# Supplementary material for: Representation learning-based genome-wide association mapping discovers genes underlying complex traits.
Source: Research Square preprint supplement (doi:10.21203/rs.3.rs-7624342/v1), 2025-09-23
Supplement: Supplementary file 1 [file c965033f2905e4d317f810de.xlsx]

## Sheet: 1. Autism Spectrum Disorder
Supplementary Data Table 1.Autism Spectrum Disorder showing gene-disease associations for methods compared including RBAM-ED, RBAM-D, RBAM-E, RBAM-XAI, SKAT, REGENIE. )The table includes gene name, chromosome, region start and end).
Gene_name	Gene_chromosome	Region_start	Region_end	Q_test (RBAM_ED)	pvalue (RBAM_ED)	Q_test (RBAM_D)	pvalue (RBAM_D)	Q_test (RBAM_E)	pvalue (RBAM_E)	Q_test (RBAM_XAI)	pvalue (RBAM_XAI)	Q_test (SKAT)	pvalue (SKAT)	CHISQ (REGENIE)	pvalue (REGENIE)
A1BG	19	57845178	58853492	1548.32	0.470148	1594.6	0.449493	5.51561	0.81684	7.45075e-21	0.792412	1.38093e+06	0.103567	0.645091	0.374818
A1CF	10	50299409	51385675	2483.53	0.398797	2679.68	0.395411	8.20867	0.739877	1.27261e-20	0.27843	2.08719e+06	0.014059	5.64653e-05	0.00261166
A2M	12	8567664	9616229	17253.8	0.000708789	18210.8	0.00048335	72.9365	0.0114205	2.8393e-20	0.185001	1.39113e+06	0.361457	0.288486	0.228271
A2ML1	12	8322621	9387001	17344.8	0.000420313	18246.8	0.000284809	81.7787	0.0176211	3.11673e-20	0.221255	1.38034e+06	0.244115	0.00150803	0.0136658
A3GALT2	1	32806766	33821098	3036.9	0.549695	3298.15	0.49748	11.1458	0.342747	6.63976e-21	0.606465	946862	0.671904	0.297618	0.232563
A4GALT	22	42192121	43221298	7926.89	0.00278725	8296.78	0.00244348	56.4498	0.0708732	3.22662e-20	0.121015	1.31807e+06	0.143981	0.0301688	0.0644384
A4GNT	3	137623713	138632390	1649.44	0.213679	1707.75	0.245529	11.6468	0.51884	5.84245e-21	0.707971	502108	0.507785	0.799761	0.430433
AAAS	12	52807456	53824864	3663.09	0.436243	3824.92	0.415188	18.8535	0.126618	5.95753e-21	0.708277	1.40954e+06	0.0819213	0.285184	0.226709
AACS	12	124565434	125643333	13368	0.0359292	13677.2	0.0287116	39.2048	0.256727	4.022e-20	0.114952	1.28389e+06	0.0220539	2.6903	0.995848
AADAC	3	151314073	152328488	1114.49	0.939447	1150.7	0.944263	5.75139	0.986002	1.15498e-20	0.731947	357746	0.22318	3.64779	1.2507
AADACL2	3	151233916	152261339	1117.98	0.950454	1154.96	0.955795	5.78976	0.990376	1.15615e-20	0.75022	478210	0.196381	3.10659	1.10804
AADACL3	1	12216110	13228760	3678.46	0.456184	3886.28	0.408907	53.52	0.0353237	1.66946e-20	0.325461	1.49425e+06	0.0819199	0.306296	0.2366
AADACL4	1	12144085	13167076	5106.04	0.423066	5349.71	0.382228	54.2775	0.034603	1.82171e-20	0.32256	1.56083e+06	0.0816095	0.513445	0.324541
AADAT	4	169560222	170591699	2905.51	0.873255	2976.24	0.872051	16.0764	0.351578	1.12126e-20	0.609947	444036	0.530811	0.793165	0.428123
AAGAB	15	66700667	67755195	6430.54	0.0195471	6384.21	0.0206434	10.6174	0.941733	1.30337e-20	0.700134	2.03186e+06	0.0699208	0.640705	0.373192
AAK1	2	68957997	70174349	1329.76	0.385919	1278.08	0.426066	2.39335	0.781622	2.68748e-21	0.777268	4.36184e+06	0.00546857	0.0876445	0.115095
AAMDC	11	77321109	78418432	651.816	0.847162	703.808	0.845572	12.1781	0.430975	7.2947e-21	0.625052	1.17992e+06	0.74208	0.0653866	0.0979012
AAMP	2	217764129	218770178	2546.29	0.677185	2527.82	0.66643	21.9503	0.25425	1.11727e-20	0.324722	118684	0.185321	0.434709	0.292696
AANAT	17	75953351	76970117	10908.2	0.0650533	11174.9	0.0570426	80.4675	0.000422831	6.16379e-20	0.00172779	1.91045e+06	0.00778579	0.78735	0.426082
AAR2	20	35736131	36770918	994.555	0.432256	937.306	0.46019	12.3073	0.139415	1.46166e-20	0.0135111	1.74814e+06	0.0353667	0.0513028	0.0857565
AARD	8	116438207	117444487	2418.84	0.417605	2858.91	0.354706	60.5887	0.02509	2.28673e-20	0.119254	1.65317e+06	0.0464917	0.00738076	0.0307999
AARS1	16	69751983	70789707	1038.61	0.793352	1035.42	0.780941	1.90855	0.816223	3.38747e-21	0.558563	1.76028e+06	0.194047	5.38119	1.69133
AARS2	6	43798731	44813347	7761.97	0.0687882	7873.91	0.0661975	43.5716	0.0980857	1.94159e-20	0.844014	1.09177e+06	0.746649	1.68864	0.71269
AARSD1	17	42450526	43464498	2706.93	0.415564	2739.56	0.413083	6.88446	0.344122	4.84257e-21	0.449062	1.4778e+06	0.173752	1.71591	0.720742
AASDH	4	55838287	56887508	2800.72	0.88684	2912.61	0.887841	15.1521	0.697784	1.79588e-20	0.504204	1.3699e+06	0.180064	0.837396	0.443526
AASDHPPT	11	105575501	106598699	2305.91	0.702229	2224.48	0.703636	6.40176	0.678098	1.05803e-20	0.601488	1.16632e+06	0.274964	0.0161427	0.0462898
AASS	7	121564583	122644308	1003.27	0.793134	1020.91	0.787956	6.74608	0.62951	6.03239e-21	0.429686	1.09966e+06	0.0478699	2.43146	0.924738
AATK	17	80610487	81666221	7629.61	0.443071	8267.32	0.394272	83.553	0.166084	4.92121e-20	0.0571795	1.58044e+06	0.204105	0.299741	0.233554
ABAT	16	8174596	9284575	13969.3	0.1967	14485.2	0.169517	84.038	0.0897434	4.67939e-20	0.659675	1.0288e+06	0.715801	0.485058	0.313239
ABCA1	9	104281006	105428155	5016.16	0.424083	5100.89	0.427659	19.8923	0.641611	2.95465e-20	0.407663	1.52435e+06	0.129364	0.34238	0.253009
ABCA10	17	68647214	69744846	4484.39	0.307615	4388.93	0.292605	15.1733	0.54904	3.23357e-20	0.0781918	1.00764e+06	0.451653	1.17986	0.556918
ABCA12	2	214431542	215638626	14304.1	0.0299264	14133	0.0301115	20.0475	0.685022	1.7955e-20	0.680312	3.96253e+06	0.000253848	2.75883	1.01449
ABCA13	7	47671458	49147497	8165.56	0.0270828	8164.4	0.0273687	31.3924	0.168825	2.60359e-20	0.54677	171806	0.388923	0.0668542	0.0991015
ABCA2	9	136507234	137528915	8073.42	0.475498	8436.34	0.429134	24.0305	0.759923	2.91897e-20	0.437763	1.85212e+06	0.11582	0.0517595	0.0861706
ABCA3	16	1775881	2840746	14914.2	0.000576801	14929.8	0.000384189	137.662	0.00890845	7.60102e-20	0.000136248	443866	0.6558	0.0758804	0.106261
ABCA4	1	93492834	94621148	4419.53	0.45776	4465.81	0.464304	13.0993	0.654494	1.53618e-20	0.552487	2.13574e+06	0.0103447	0.221549	0.195273
ABCA5	17	68744311	69827244	4381.51	0.250926	4299.78	0.238685	15.0169	0.52302	1.38687e-20	0.626723	796370	0.472317	0.0283323	0.0623167
ABCA6	17	68578702	69641895	4364	0.233402	4288.74	0.223146	16.1066	0.51775	3.48531e-20	0.0845067	3.76745e+06	0.000237974	2.11494	0.83604
ABCA7	19	539997	1565572	8730.87	0.63903	9079.55	0.608535	51.4377	0.307679	6.04204e-20	0.0881431	3.9414e+06	0.000239387	0.34496	0.25416
ABCA8	17	68367289	69455392	3305.79	0.365576	3368.71	0.340911	13.5247	0.620396	3.28615e-20	0.119131	2.14233e+06	0.0201107	0.309023	0.237861
ABCA9	17	68474488	69560949	4412.51	0.223685	4353.6	0.216509	16.8224	0.561278	3.53882e-20	0.090831	4.09466e+06	0.000152068	0.0281391	0.06209
ABCB1	7	87003017	88213323	1558.27	0.350436	1602.31	0.348784	4.22441	0.579856	6.66814e-21	0.498693	3.94607e+06	0.000249861	0.0189459	0.0503555
ABCB10	1	229016582	230058707	3463.14	0.527839	3474.45	0.531053	18.287	0.295354	1.82911e-20	0.582069	3.17673e+06	0.0183084	0.0956764	0.120858
ABCB11	2	168415498	169531324	8934.88	0.193519	8833.23	0.200394	18.0958	0.831682	2.73007e-20	0.324504	68425.8	0.86953	0.000887289	0.0104449
ABCB4	7	86901696	87980435	928.361	0.575365	981.323	0.561537	4.15512	0.566483	4.6224e-21	0.641034	431941	0.70151	0.267962	0.218458
ABCB5	7	20115667	21277038	9051.05	0.0552681	9641.75	0.043186	62.025	0.26181	3.03554e-20	0.553322	1.37318e+06	0.222393	1.05329	0.516057
ABCB6	2	218709772	219718994	3986.6	0.315946	4320.58	0.24078	35.6361	0.0174031	1.32758e-20	0.224179	2.90436e+06	0.0459053	0.793289	0.428166
ABCB8	7	150528422	151547782	4392.18	0.1983	4424.53	0.19866	14.5019	0.726443	1.46642e-20	0.929929	234791	0.0213742	3.83024	1.29812
ABCB9	12	122420951	123481649	968.579	0.716881	1079.88	0.650448	12.261	0.559395	2.22879e-20	0.0976652	1.72806e+06	0.0253167	0.0300169	0.0642652
ABCC1	16	15449138	16643257	7347.7	0.0452384	7376.26	0.0544861	44.153	0.131555	2.21533e-20	0.189535	1.10748e+06	0.20338	0.161586	0.162601
ABCC10	6	42927366	43950427	2496.67	0.634867	2704.59	0.609833	21.485	0.105195	1.16783e-20	0.844698	1.80262e+06	0.0701177	2.56546	0.961695
ABCC11	16	47665773	48747568	743.629	0.912956	779.858	0.901016	3.10382	0.659875	5.05646e-21	0.500547	1.88194e+06	0.167719	0.263935	0.216504
ABCC12	16	47580882	48656018	469.704	0.954466	503.862	0.946829	2.69206	0.51454	4.74637e-21	0.402932	1.05241e+06	0.362631	0.262153	0.215636
ABCC2	10	99282640	100352594	2067.41	0.951492	1931.5	0.969016	12.6322	0.821106	1.0093e-20	0.777588	1.01515e+06	0.308347	0.048745	0.0834084
ABCC3	17	50134777	51192253	21083.6	3.14686e-05	21125.1	3.29722e-05	26.7071	0.578961	2.79804e-20	0.493146	1.06123e+06	0.0139793	0.568759	0.346062
ABCC4	13	94519835	95801475	12382.4	0.254917	12219.3	0.259128	35.3097	0.232824	5.65684e-20	0.0799145	2.10573e+06	0.0111646	0.0195476	0.051192
ABCC5	3	183419934	184517939	2233.78	0.641875	2202.55	0.646189	9.58045	0.635136	1.2047e-20	0.709276	1.69057e+06	0.111954	0.0195476	0.051192
ABCC6	16	15649565	16723522	7720.13	0.0340382	7701.95	0.0382397	45.5415	0.0544772	2.21882e-20	0.106316	183999	0.381112	2.22158	0.866161
ABCC8	11	16892498	17976894	3385.31	0.349875	3575.58	0.338964	22.5097	0.270298	1.48277e-20	0.669457	1.71281e+06	0.0790685	2.33663	0.898382
ABCC9	12	21297389	22442543	4479.09	0.673676	4839.65	0.659772	29.8908	0.357095	2.09067e-20	0.242709	1.83818e+06	0.056584	0.143359	0.151833
ABCD2	12	39050033	40119803	3078.85	0.354032	3148.92	0.374743	4.30988	0.894857	1.37422e-20	0.204647	1.88267e+06	0.215844	0.168484	0.166558
ABCD3	1	93918389	95018666	6342.79	0.477595	6369.18	0.473549	16.4299	0.786123	2.28627e-20	0.604207	2.11195e+06	0.0463973	0.00460115	0.0241458
ABCD4	14	73785269	74803055	1851.19	0.772629	1821.41	0.779793	5.04584	0.772564	5.25921e-21	0.946694	1.23127e+06	0.098823	3.15101	1.11987
ABCE1	4	144598288	145629524	866.763	0.637773	938.367	0.656812	4.42773	0.902418	6.04779e-21	0.676914	1.28585e+06	0.054464	0.918496	0.47125
ABCF1	6	30071393	31097179	876.438	0.919285	905.712	0.907015	6.95151	0.905133	8.92629e-21	0.745947	319578	0.555025	1.52717	0.664467
ABCF2	7	150711484	151727205	12178.4	0.0017114	12160.3	0.00154709	25.5065	0.43505	2.07638e-20	0.724553	1.21614e+06	0.42217	0.449572	0.298831
ABCF2-H2BK1	7	150707837	151727166	12178.4	0.0017114	12160.3	0.00154709	25.5065	0.43505	2.07638e-20	0.724553	1.09364e+06	0.0676967	0.296706	0.232136
ABCF3	3	183686095	184694012	3880.37	0.248181	3827.78	0.240934	15.7686	0.351143	1.27943e-20	0.663091	1.09795e+06	0.0674044	0.985501	0.493705
ABCG1	21	41699689	42797244	8792.06	0.435935	8861.18	0.473476	71.5196	0.225549	4.35749e-20	0.607184	145265	0.333877	0.985501	0.493705
ABCG2	4	87590150	88731628	5148.34	0.234038	5486.2	0.189861	19.6249	0.0614496	2.44536e-20	0.0868829	1.13411e+06	0.335079	0.985501	0.493705
ABCG4	11	118649052	119662653	4661.29	0.154607	4754.34	0.147242	18.598	0.055577	1.78358e-20	0.0752124	2.95932e+06	0.0274938	0.937718	0.477731
ABCG5	2	43312472	44338865	2289.8	0.462838	2436.17	0.422308	28.2263	0.312159	1.69155e-20	0.312276	1.49912e+06	0.0410429	0.967974	0.487868
ABCG8	2	43331942	44382988	2289.8	0.462838	2436.17	0.422308	28.2263	0.312159	1.69155e-20	0.312276	1.56349e+06	0.384815	1.61181e-05	0.0013934
ABHD1	2	26623789	27630812	912.261	0.897283	915.872	0.903865	2.16665	0.707938	2.19019e-21	0.83412	1.55412e+06	0.384476	0.982588	0.492737
ABHD10	3	111479010	112493368	11324.2	0.039403	11724.7	0.0309716	34.1731	0.282385	5.32148e-20	0.00423827	1.34328e+06	0.831869	0.100767	0.124411
ABHD11	7	73236094	74238852	4653.05	0.271252	4836.46	0.243182	10.9218	0.574467	1.0766e-20	0.549392	910027	0.337806	1.49583	0.654991
ABHD12	20	24794742	25890835	778.124	0.879633	835.265	0.872415	5.64536	0.701607	7.67555e-21	0.761723	2.01287e+06	0.0190757	0.10673	0.128487
ABHD12B	14	50372053	51404970	6970.1	0.170935	7246.19	0.14787	27.073	0.70882	2.40285e-20	0.516774	1.35316e+06	0.381924	0.0670752	0.0992813
ABHD13	13	107718392	108734243	7800.54	0.260431	7985.94	0.262765	76.7022	0.104512	4.22212e-20	0.336524	2.07064e+06	0.016431	0.208277	0.188344
ABHD14A	3	51471426	52481196	504.395	0.641343	509.833	0.621562	4.06988	0.306359	2.44138e-21	0.400285	1.18536e+06	0.086028	1.62352	0.693357
ABHD14A-ACY1	3	51474706	52489183	504.395	0.641343	509.833	0.621562	4.06988	0.306359	2.44138e-21	0.400285	1.18966e+06	0.190349	0.107911	0.129283
ABHD14B	3	51468510	52483409	504.395	0.641343	509.833	0.621562	4.06988	0.306359	2.44138e-21	0.400285	1.19173e+06	0.191632	0.139127	0.149262
ABHD15	17	29060547	30067037	629.844	0.248675	620.68	0.232345	1.31233	0.314187	2.44475e-21	0.329596	1.19023e+06	0.192645	0.0755614	0.106014
ABHD16A	6	31186955	32203356	2011.28	0.822936	2082.55	0.837087	31.3065	0.60671	4.26146e-20	0.616257	3.17579e+06	0.00121562	1.10199	0.531903
ABHD16B	20	63361498	64362988	10869.9	0.120061	10970.3	0.119474	25.3204	0.494435	2.77416e-20	0.179187	1.11113e+06	0.31743	0.281699	0.225053
ABHD17A	19	1376810	2385496	6413.5	0.329248	6512.51	0.335589	31.7465	0.188895	3.56454e-20	0.116005	1.34448e+06	0.294635	0.486062	0.313642
ABHD17B	9	71362452	72411193	9370.48	0.00599535	9927.07	0.00470879	27.2077	0.372766	3.01248e-20	0.173598	2.12888e+06	0.00612233	0.684466	0.389283
ABHD17C	15	80179684	81255621	5788.13	0.454115	5891.94	0.438174	14.4933	0.8941	2.05709e-20	0.700872	1.86508e+06	0.025538	0.320766	0.243251
ABHD18	4	127465315	128539953	184.953	0.827392	204.525	0.844543	1.15874	0.90359	1.67228e-21	0.946586	1.01093e+06	0.751069	2.72082	1.00416
ABHD2	15	88587459	89702355	7400.71	0.0395187	7675.68	0.0349851	41.2034	0.161486	2.81257e-20	0.0298184	1.31665e+06	0.0933729	2.0909	0.829215
ABHD3	18	21150901	22204780	1030.21	0.218564	1068.6	0.248139	10.5052	0.144697	1.0938e-20	0.136668	1.58458e+06	0.114791	1.03595	0.510372
ABHD4	14	22098290	23112963	7342.02	0.442895	7278.54	0.466611	26.825	0.561201	3.35419e-20	0.46365	1.56775e+06	0.459267	2.88239	1.04792
ABHD5	3	43190108	44234371	3406.94	0.748355	3397.64	0.779568	6.40033	0.989779	1.12813e-20	0.830335	1.88996e+06	0.0760293	1.65092	0.701509
ABHD6	3	57737532	58795693	6655.86	0.0916771	6966.31	0.0812944	18.2345	0.317677	1.58314e-20	0.443094	1.91059e+06	0.256851	0.182031	0.174163
ABHD8	19	16792131	17810236	11049.5	0.00723369	10748.8	0.00616555	59.4937	0.0374863	4.06146e-20	0.0442308	1.4308e+06	0.0825112	0.1543	0.158353
ABI1	10	26246593	27361087	3868.03	0.724507	3858.15	0.747418	15.6245	0.892067	1.13727e-20	0.922874	1.83256e+06	0.0336074	0.102315	0.125478
ABI2	2	202828280	203947728	10353.1	0.0086158	10318.1	0.00849767	11.1051	0.133885	7.42125e-21	0.211121	2.01603e+06	0.352654	2.58768	0.967791
ABI3	17	48710411	49723225	3482.82	0.204321	3386.67	0.212722	8.15168	0.736685	1.37697e-20	0.302969	1.14412e+06	0.0561171	2.38145	0.910861
ABI3BP	3	100249156	101493515	2363.3	0.688645	2377.36	0.656965	28.0793	0.0856834	2.14891e-20	0.133937	1.71869e+06	0.106525	2.74112	1.00968
ABITRAM	9	108434400	109450744	4570.06	0.0588413	4749.37	0.0590524	35.3029	0.236538	2.44007e-20	0.187264	1.19835e+06	0.00722727	0.761601	0.416996
ABL1	9	130213043	131387675	4813.2	0.970354	4935.65	0.97296	21.8263	0.940168	2.46684e-20	0.950435	789866	0.106012	0.433703	0.292279
ABL2	1	178599330	179729684	3951.14	0.353214	4114.02	0.333	20.7614	0.598334	1.26645e-20	0.662896	1.30528e+06	0.0953254	0.177653	0.171728
ABLIM1	10	113931112	115268061	7010.63	0.103441	7176.85	0.110907	51.1588	0.0634652	5.53759e-20	0.00270672	550048	0.0149565	1.50883	0.658927
ABLIM2	4	7465310	8658832	14110.5	0.706508	14930.1	0.658052	101.684	0.355974	5.42445e-20	0.728493	1.66195e+06	0.0144751	0.0306927	0.0650333
ABLIM3	5	148641483	149760542	3566.81	0.350609	3557.77	0.378945	8.15662	0.907274	1.54093e-20	0.844893	1.80954e+06	0.115818	0.0748714	0.105478
ABO	9	132733278	133776024	8005.18	0.340215	7767.58	0.384502	60.7381	0.0277442	3.67677e-20	0.174968	320868	0.240071	1.81144	0.748763
ABR	17	503519	1729738	14590.3	0.110718	15059.9	0.095161	39.1899	0.474145	4.01441e-20	0.368509	798610	0.219995	1.69269	0.713887
ABRA	8	106259483	107270244	1607.68	0.429641	1613.57	0.426463	8.38547	0.678211	1.25799e-20	0.448765	2.60466e+06	0.00805773	2.34252	0.900022
ABRACL	6	138528745	139543302	1461.9	0.952803	1511.57	0.955304	7.10129	0.951093	1.05662e-20	0.815544	900349	0.686839	3.1185	1.11121
ABRAXAS1	4	82959517	84023348	7984.73	0.347466	8188.45	0.33016	22.224	0.742398	3.26686e-20	0.0775397	512259	0.634038	1.29784	0.594128
ABRAXAS2	10	124301819	125336667	5427.2	0.439223	5441.8	0.495023	25.619	0.477692	2.05768e-20	0.476425	1.0441e+06	0.190322	2.09755	0.831103
ABT1	6	26096953	27100739	3209.12	0.080374	3300.19	0.0669794	20.388	0.121186	7.27003e-21	0.16616	1.44742e+06	0.00608239	1.09803	0.530622
ABTB1	3	127172935	128180926	3989.94	0.285096	4006.74	0.297602	44.7823	0.119165	2.52893e-20	0.196314	1.7715e+06	0.280039	0.515117	0.325201
ABTB2	11	33650987	34858010	16205.1	0.00185223	16041.7	0.001852	32.1278	0.585555	4.22507e-20	0.190618	1.13967e+06	0.12661	0.0474493	0.0821992
ABTB3	12	106818421	108159642	5164.75	0.270078	5054.89	0.286969	11.1563	0.850923	9.22278e-21	0.862716	2.5972e+06	0.00371668	0.105284	0.127507
ACAA1	3	37603129	38637242	7806.56	0.0259533	8311.05	0.0212365	46.7866	0.0606797	2.25733e-20	0.0533471	1.28842e+06	0.488977	1.3125	0.598697
ACAA2	18	49282164	50313953	2229.93	0.652679	2280.41	0.648134	14.1808	0.0917597	1.49366e-20	0.428512	2.35781e+06	0.010719	0.159547	0.161419
ACACB	12	108616587	109768226	1538.98	0.79279	1584.77	0.779925	7.03631	0.845498	8.5512e-21	0.921815	1.41138e+06	0.164561	0.151665	0.156799
ACAD10	12	111186053	112257107	2349.53	0.00806655	2705.37	0.00583784	17.4228	0.126664	2.9502e-21	0.304339	2.30763e+06	0.0301364	1.2853	0.590209
ACAD11	3	132058138	133160082	3000.81	0.747625	2893.1	0.781663	4.27588	0.842142	1.24803e-20	0.449461	839343	0.283777	0.363964	0.262558
ACAD8	11	133753548	134765855	5285.62	0.580089	5219.91	0.618642	37.6143	0.416068	2.7952e-20	0.612367	771927	0.500308	0.265801	0.217411
ACAD9	3	128379596	129424003	12910.3	0.00189892	13290.6	0.00188157	10.2599	0.426603	1.49519e-20	0.411621	698537	0.123485	1.86978	0.765736
ACADL	2	209687126	210725447	2788.81	0.06323	2904.44	0.070648	2.74087	0.50462	1.1855e-20	0.148591	858846	0.00803565	0.0233866	0.0562799
ACADM	1	75224431	76287575	3443.57	0.279045	3286.45	0.304989	21.9598	0.216064	1.11879e-20	0.819631	712578	0.293841	0.578371	0.34974
ACADS	12	120225774	121240008	5253.76	0.4882	5436.83	0.463801	19.7581	0.0290773	1.79884e-20	0.127289	78606.4	0.29533	4.21528	1.39727
ACADSB	10	122508979	123558290	6374.72	0.467957	6364.36	0.444168	61.5403	0.0105675	3.45781e-20	0.00854189	1.64897e+06	0.0505086	0.76007	0.416454
ACADVL	17	6717125	7725266	3804.46	0.788285	3818.18	0.78548	44.6596	0.127892	1.92993e-20	0.564957	1.17836e+06	0.286744	4.56761	1.48702
ACAN	15	88303436	89375353	6657.32	0.0510835	6965.01	0.0507805	39.7528	0.227759	3.27695e-20	0.00907694	1.09988e+06	0.232848	0.257992	0.213601
ACAP1	17	6836529	7851477	5598.7	0.493543	5447.66	0.52133	48.6688	0.101589	2.17016e-20	0.576993	1.37781e+06	0.520288	4.50742	1.47175
ACAP2	3	194774745	195943044	9684.82	0.226961	9942.65	0.22859	52.7926	0.41034	4.45079e-20	0.426676	1.35203e+06	0.267999	2.29921	0.887933
ACAP3	1	792390	1809609	20834.5	0.00440673	21001	0.00426488	51.4464	0.0120469	3.25971e-20	0.222903	1.49928e+06	0.279608	1.79353	0.74353
ACAT1	11	107616695	108647603	1559.14	0.662337	1512.07	0.690996	5.77262	0.941317	7.80245e-21	0.61451	107535	0.713927	0.919577	0.471616
ACAT2	6	159262045	160279112	4580.32	0.2522	4486.36	0.263162	30.7704	0.131028	2.90543e-20	0.159788	1.87224e+06	0.0302368	0.443179	0.2962
ACBD3	1	225644679	226686741	4661.31	0.750328	4752.15	0.732635	18.4599	0.377888	2.15859e-20	0.431215	1.2011e+06	0.110715	0.320638	0.243193
ACBD4	17	44632600	45644181	2643.46	0.212912	2497.56	0.244661	8.02431	0.784914	3.91351e-21	0.986817	356527	0.616348	6.67767	2.01043
ACBD5	10	26668135	27743046	7275.18	0.16125	7060.72	0.187317	16.7083	0.777096	1.6771e-20	0.68508	22457.9	0.998584	0.0701255	0.101739
ACBD6	1	179769653	181002954	4516.03	0.551406	4410.67	0.567084	12.5844	0.663126	8.28691e-21	0.950415	1.11301e+06	0.467546	0.376369	0.267966
ACBD7	10	14575475	15588776	7745.11	0.157545	7665.98	0.167289	13.9599	0.974892	2.59989e-20	0.579379	1.94668e+06	0.332833	7.59934	2.23366
ACCS	11	43565925	44584237	5150.15	0.738208	5340.25	0.725934	20.7156	0.833432	2.02133e-20	0.73549	486094	0.671129	7.59934	2.23366
ACCSL	11	43547981	44559977	5143.58	0.731304	5327.38	0.714602	19.6635	0.750776	1.95272e-20	0.629697	1.06895e+06	0.310957	7.59934	2.23366
ACD	16	67157512	68160810	43.4821	1	46.1214	1	0.0931921	0.9015	9.92556e-23	1	1.49775e+06	0.407151	0.627089	0.368125
ACE	17	62977061	63998380	1695.75	0.439845	1783.07	0.412854	5.35418	0.216957	7.44784e-21	0.0849608	1.49189e+06	0.392856	0.0207402	0.0528168
ACER1	19	5806142	6833612	7182.82	0.497289	7187.9	0.484457	18.5957	0.401234	2.37154e-20	0.821033	1.79276e+06	0.0853051	0.69989	0.394888
ACER2	9	18909009	19952505	5608.47	0.513559	5804.11	0.477708	18.1876	0.848608	3.06548e-20	0.475972	1.34203e+06	0.385117	0.994958	0.496845
ACER3	11	76360859	77526797	4695.72	0.370178	4670.27	0.397479	20.3253	0.456157	1.29098e-20	0.654504	1.64448e+06	0.290422	0.0594305	0.0929122
ACHE	7	100389994	101396974	2438.03	0.264318	2374.6	0.299153	21.2376	0.124334	1.14614e-20	0.413962	2.94796e+06	0.0125687	1.88225	0.769349
ACIN1	14	22558564	23595614	9445.8	0.072367	9013.39	0.0981603	34.4299	0.0963003	3.12638e-20	0.345057	1.70478e+06	0.0119242	5.4661	1.71245
ACKR1	1	158704875	159706500	7769.39	0.192284	7730.67	0.204141	9.94964	0.809306	1.86541e-20	0.655069	878511	0.0350965	0.211903	0.190252
ACKR2	3	42304752	43387974	3528.45	0.88333	3552.33	0.887234	7.85657	0.999001	7.42049e-21	0.995155	1.19139e+06	0.314429	0.950313	0.481961
ACKR3	2	236067787	237082354	1142.86	0.910158	1232.72	0.902634	8.51793	0.679039	1.05021e-20	0.481157	491524	0.176935	0.212555	0.190594
ACKR4	3	132097270	133118967	2958.56	0.752583	2852.68	0.783939	4.08824	0.702726	1.15126e-20	0.470233	1.61964e+06	0.106499	1.18875	0.55975
ACLY	17	41366917	42430542	2500.96	0.869594	2630.56	0.846513	15.131	0.778795	1.46959e-20	0.643873	111725	0.122223	1.46566	0.645832
ACMSD	2	134338616	135402034	1090.02	0.506033	1037.55	0.524292	3.5012	0.528954	5.56468e-21	0.31593	672971	0.0701373	0.530181	0.33112
ACO1	9	31884603	32954769	7319.42	0.467284	7145.62	0.496562	23.3333	0.664244	4.64371e-20	0.0025033	1.65338e+06	0.0562696	0.798601	0.430027
ACO2	22	40947830	42029273	1113.08	0.603893	1198.01	0.613786	11.8247	0.23756	1.7829e-20	0.0405266	368151	0.446378	0.176339	0.170993
ACOD1	13	76448511	77458638	1089.64	0.783044	1041.44	0.808428	10.4774	0.716584	5.87883e-21	0.901441	1.24791e+06	0.556503	0.473929	0.308755
ACOT1	14	73037143	74043796	839.059	0.943243	820.767	0.942974	3.72248	0.493903	1.05553e-20	0.459624	1.56518e+06	0.254396	1.28221	0.589244
ACOT11	1	54042257	55139192	10319.1	0.167546	10572.6	0.14648	42.5204	0.278359	4.04703e-20	0.15789	1.48685e+06	0.00975756	0.0878952	0.115278
ACOT12	5	80829996	81894179	4987.37	0.12221	4803.32	0.129305	45.3018	0.0165128	1.52315e-20	0.618794	2.07535e+06	0.0112987	0.235797	0.202553
ACOT13	6	24167035	25205065	3937.19	0.783097	4036.16	0.787731	19.0841	0.633227	1.25147e-20	0.972328	3.12342e+06	0.0267028	0.0975598	0.122181
ACOT2	14	73067620	74075658	839.059	0.943243	820.767	0.942974	3.72248	0.493903	1.05553e-20	0.459624	1.09098e+06	0.56706	1.60767	0.68863
ACOT4	14	73091873	74095766	839.059	0.943243	820.767	0.942974	3.72248	0.493903	1.05553e-20	0.459624	1.28855e+06	0.392411	1.59858	0.685912
ACOT6	14	73110945	74119888	839.059	0.943243	820.767	0.942974	3.72248	0.493903	1.05553e-20	0.459624	2.00787e+06	0.0147774	1.10878	0.5341
ACOT7	1	5764269	6893767	3485.85	0.620432	3605.45	0.609202	20.3919	0.209527	1.6071e-20	0.444414	2.01445e+06	0.0131822	0.474726	0.309077
ACOT8	20	45341721	46357405	1972.46	0.631431	2103.93	0.613793	26.1488	0.338348	1.15651e-20	0.560459	2.00681e+06	0.0144155	0.192285	0.179784
ACOX1	17	75441507	76479177	6967.25	0.0393259	7202.15	0.0325428	40.4676	0.104453	1.86973e-20	0.25244	1.77079e+06	0.356697	0.463359	0.304467
ACOX2	3	58005136	59037283	5222.12	0.109461	5530.39	0.0992035	16.6681	0.331233	1.45737e-20	0.466394	1.09961e+06	0.390371	1.56362	0.675437
ACOX3	4	7866282	8940723	11745.4	0.714355	12024.6	0.668449	30.0133	0.967595	3.40949e-20	0.946087	1.70675e+06	0.0290243	0.247992	0.208666
ACOXL	2	110232539	111618548	6944.32	0.161759	6787.09	0.156909	22.6402	0.406252	2.6582e-20	0.234057	1.41612e+06	0.148467	0.00837463	0.0328805
ACP1	2	1	778283	2788.23	0.582947	3097.85	0.503537	22.8148	0.0595682	2.01012e-20	0.378155	1.52649e+06	0.239273	0.645421	0.37494
ACP2	11	46739302	47748906	8419.81	0.000407423	8815.71	0.000311512	10.5545	0.358908	1.636e-21	0.860718	1.91041e+06	0.0677422	0.125563	0.140815
ACP3	3	131817369	132868302	4940.67	0.15359	5069.96	0.158472	12.2958	0.311486	1.14796e-20	0.216327	1.78051e+06	0.0018342	5.52095	1.72607
ACP4	19	50290415	51295219	9717.08	0.105706	9929.42	0.099782	34.7796	0.908169	4.13277e-20	0.510852	1.01425e+06	0.117037	1.65203	0.70184
ACP5	19	11074653	12079993	2703.5	0.683585	2623.12	0.727747	15.9246	0.508696	1.6691e-20	0.276468	813449	0.0552188	0.106198	0.128126
ACP6	1	147129652	148170524	9358.92	0.0356371	9095.01	0.0361263	24.0355	0.0681733	2.69231e-20	0.0857972	2.06227e+06	0.011674	2.67308	0.99115
ACP7	19	38583913	39611493	3642.33	0.524668	4099.01	0.467214	34.7816	0.0872199	2.10969e-20	0.210667	1.40643e+06	0.215829	0.145079	0.15287
ACR	22	50238196	51245339	3173.79	0.303394	3559.12	0.284627	38.3155	0.257127	2.11619e-20	0.297379	1.14267e+06	0.00917504	4.26505	1.41
ACRBP	12	6138075	7147433	10413.7	0.0179371	10526	0.0172444	39.399	0.304968	3.34389e-20	0.308096	1.88145e+06	0.138435	0.0425233	0.0774689
ACRV1	11	125171522	126180874	2513.2	0.61737	2650.57	0.587364	15.9781	0.721725	1.76104e-20	0.838157	2.06592e+06	0.0112745	0.0425233	0.0774689
ACSBG1	15	77667468	78745688	14112.3	0.110192	14334.8	0.11529	29.4678	0.666594	2.27649e-20	0.877992	1.65356e+06	0.342121	2.40945	0.918637
ACSBG2	19	5635247	6693094	5512.28	0.773435	5479.66	0.758028	14.5356	0.460118	2.06856e-20	0.922125	706169	0.755978	0.531474	0.331625
ACSF2	17	49926158	50974845	22657	0.000212485	22707.9	0.000223134	30.7098	0.645306	3.57511e-20	0.540192	1.34979e+06	0.514122	0.777129	0.422484
ACSF3	16	88588375	89664121	6758.46	0.688106	6881.84	0.689205	33.0359	0.516941	5.27264e-20	0.0481659	1.91122e+06	0.183671	0.463777	0.304637
ACSL1	4	184255595	185326818	11493.7	0.0717187	11933.7	0.0646664	29.4119	0.692689	2.98904e-20	0.659774	2.03041e+06	0.00141707	0.000519543	0.00797033
ACSL3	2	222360942	223444639	3509.86	0.399713	3566.51	0.391647	13.6749	0.627056	1.28509e-20	0.816791	1.49669e+06	0.133381	0.755359	0.414782
ACSL5	10	111874116	112928379	8128.02	0.0483747	8400.3	0.0512108	22.025	0.397559	1.35543e-20	0.819268	186870	0.103136	0.0381908	0.0731122
ACSL6	5	131449973	132512243	913.025	0.64429	973.652	0.628469	2.52081	0.823571	5.95921e-21	0.408961	130633	0.970242	0.390908	0.274233
ACSM1	16	20123235	21198890	9858.51	0.0217986	9416.6	0.0291959	41.7592	0.00980107	2.14176e-20	0.150808	1.1805e+06	0.247002	0.861673	0.451892
ACSM2A	16	19951461	20987669	12525.5	0.00455091	12122.6	0.00646077	54.4651	0.00550473	2.52304e-20	0.073014	753947	0.518876	0.0487357	0.0833997
ACSM2B	16	20036226	21076427	12002.5	0.00466371	11607.1	0.0060628	42.6582	0.00836611	2.67601e-20	0.0834209	2.75066e+06	0.0378	10.0488	2.81689
ACSM3	16	20110243	21297581	10266.1	0.0244075	9865.67	0.0332031	42.8691	0.0100561	2.56405e-20	0.101724	2.86548e+06	0.0083144	0.800725	0.43077
ACSM4	12	6804072	7828719	7252.98	0.623927	7147.91	0.684508	20.8791	0.915859	2.69415e-20	0.630629	2.84442e+06	0.00889412	0.04789	0.082612
ACSM5	16	19909534	20941336	12513.8	0.00452639	12110.5	0.0064251	54.461	0.00550312	2.4518e-20	0.0604806	2.95765e+06	0.0524433	0.0155218	0.0453471
ACSM6	10	94694200	95728929	1992.68	0.589703	2098.09	0.572036	9.37088	0.765296	1.30153e-20	0.354141	1.52491e+06	0.298015	0.0253742	0.0587679
ACSS1	20	24506230	25558980	526.835	0.951874	547.487	0.957284	4.97548	0.92015	9.00668e-21	0.849377	2.67893e+06	0.0143682	0.307653	0.237228
ACSS2	20	34372146	35427962	1025.68	0.678778	1054.8	0.672155	5.28621	0.383891	4.84602e-21	0.320115	1.49623e+06	0.112103	0.303809	0.235447
ACSS3	12	80436414	81761210	4748.26	0.59499	5520.89	0.442025	85.8787	0.000247461	2.27332e-20	0.418593	1.05495e+06	0.513339	1.07509	0.523171
ACTA1	1	228930365	229934104	2917.59	0.733278	3081.82	0.729309	10.3352	0.782613	1.98141e-20	0.654278	1.52872e+06	0.145446	0.985501	0.493705
ACTA2	10	88435074	89491339	3244.47	0.392015	3277.85	0.403633	19.9752	0.528958	1.3393e-20	0.660946	1.45586e+06	0.653768	0.609995	0.361721
ACTB	7	5026409	6063902	20399.5	4.02726e-05	20352.7	4.33007e-05	36.0782	0.19562	3.54543e-20	0.16021	58234.9	0.913796	1.82167	0.751746
ACTBL2	5	56980018	57982811	3957.28	0.176609	3905.28	0.192029	16.2743	0.0732564	2.41478e-20	0.0627457	1.33967e+06	0.237207	1.27308	0.586383
ACTC1	15	34290107	35295589	9075.99	0.0473106	9220.12	0.0492068	36.9026	0.231672	1.70073e-20	0.867653	1.58548e+06	0.288352	0.533419	0.332386
ACTG1	17	81009413	82023847	9924.56	0.0549711	9954.72	0.0644238	93.795	0.100123	5.47861e-20	0.00589929	1.33896e+06	0.0147776	2.18658	0.856303
ACTG2	2	73392314	74419865	3647.94	0.179024	3688.52	0.180971	3.17217	0.679774	2.77886e-21	0.975965	1.4328e+06	0.179943	0.112272	0.132196
ACTL10	20	33166943	34168525	1769.23	0.73472	1860.3	0.725148	5.70517	0.634281	2.56893e-21	0.938856	1.0932e+06	0.453057	0.45927	0.302801
ACTL6A	3	179062886	180088407	1975.37	0.836102	1950.07	0.842213	6.75194	0.6501	1.02708e-20	0.742441	1.9923e+06	0.0193644	0.268942	0.218933
ACTL6B	7	100143097	101156448	2371.37	0.221747	2309.71	0.253495	21.0673	0.124741	8.21006e-21	0.462609	1.28382e+06	0.213232	0.633546	0.370532
ACTL7A	9	108362266	109363756	5180.39	0.0388593	5333.34	0.0405246	35.4788	0.229123	2.6871e-20	0.126772	515540	0.0236509	0.364931	0.262982
ACTL7B	9	108354588	109355986	5180.39	0.0388593	5333.34	0.0405246	35.4788	0.229123	2.6871e-20	0.126772	1.05009e+06	0.00434418	0.593604	0.355533
ACTL8	1	17255333	18327063	14485.5	0.0781591	14537.4	0.0799568	44.4386	0.610531	4.50392e-20	0.0674473	848154	0.146614	0.444897	0.296908
ACTL9	19	8197400	9198795	7036.74	0.304523	7345.41	0.27526	21.2873	0.424978	2.43505e-20	0.510283	847132	0.145295	0.722682	0.403111
ACTMAP	19	40240856	41251553	1834.98	0.771315	1932.57	0.764654	16.3716	0.484495	1.98929e-20	0.190537	1.19984e+06	0.506288	0.172851	0.169033
ACTN1	14	68374128	69479440	4223.54	0.649376	4140.84	0.683371	18.4882	0.495853	2.19033e-20	0.32732	1.35351e+06	0.165591	0.33109	0.247938
ACTN2	1	236164141	237264631	8998.56	0.36145	8960.38	0.368735	44.1869	0.0803396	4.23309e-20	0.235482	1.04496e+06	0.508825	0.369562	0.265006
ACTN3	11	66046395	67063334	1948.04	0.616451	1849.56	0.63635	3.40627	0.71892	2.70776e-21	0.82448	4.12438e+06	0.000167329	0.0953363	0.120618
ACTN4	19	38147649	39231589	1310.36	0.934391	1334.52	0.930358	13.671	0.692484	2.17937e-20	0.19312	146970	0.114838	1.77103	0.736946
ACTR10	14	57700080	58735636	4032.22	0.124033	4146.07	0.122076	10.9921	0.671662	8.92468e-21	0.808729	1.48267e+06	0.0371668	0.921891	0.472397
ACTR1A	10	101961881	103002712	1687.86	0.64718	1605.7	0.664924	7.4177	0.186868	5.89812e-21	0.260232	2.46554e+06	0.0443334	0.0475315	0.0822763
ACTR1B	2	97155939	98164044	28.9972	0.990381	32.8327	0.988731	0.905033	0.911121	5.819e-22	0.95706	1.45323e+06	0.0417106	0.928622	0.474668
ACTR2	2	64727788	65771253	8041.17	0.0524311	8029.74	0.0494348	22.04	0.46396	2.16853e-20	0.417844	537085	0.64219	0.89916	0.464697
ACTR3	2	113390063	114462596	2005.06	0.647414	1962.08	0.650959	3.11899	0.737133	1.07799e-20	0.432184	753021	0.153061	0.310281	0.238442
ACTR3B	7	152259749	153355378	9282.66	0.258023	9558.3	0.221227	43.4779	0.16953	4.28244e-20	0.193157	1.37944e+06	0.43602	0.420858	0.286922
ACTR3C	7	149743916	150823725	21092.2	3.60413e-05	21184.2	3.53216e-05	57.7522	0.0974521	2.23535e-20	0.681979	749918	0.640473	0.035984	0.0708118
ACTR5	20	38248460	39272520	2923.59	0.610213	3026.11	0.602934	12.1683	0.344664	7.10802e-21	0.491889	1.0551e+06	0.0154882	1.03775	0.510963
ACTR6	12	99699122	100741865	3209.59	0.244885	3322.32	0.23175	4.92053	0.745763	5.93963e-21	0.869045	1.5224e+06	0.0121736	2.43612	0.92603
ACTR8	3	53367066	54382152	2074.65	0.851268	2123.71	0.852358	21.029	0.269943	1.4045e-20	0.503699	2.30504e+06	0.0600588	0.140416	0.150048
ACTRT2	1	2521467	3522903	8739.45	0.17393	8771.89	0.181311	13.2779	0.863704	1.48353e-20	0.871545	1.32447e+06	0.000142221	0.581579	0.350963
ACTRT3	3	169266921	170269561	963.285	0.82703	961.159	0.834103	3.3392	0.783634	2.93579e-21	0.814297	2.63961e+06	0.0163069	0.447752	0.298083
ACVR1	2	157236251	158376330	7886.26	0.133926	7441.94	0.188626	40.0719	0.0595662	1.65097e-20	0.521631	1.60661e+06	0.506747	1.3967	0.624745
ACVR1B	12	51451699	52497078	2269.37	0.644592	2184.94	0.690181	10.9836	0.940515	2.14078e-20	0.394579	401090	0.519479	2.06058	0.820583
ACVR1C	2	157026767	158128864	7091	0.0183396	6653.24	0.0296539	40.7478	0.0139934	1.62791e-20	0.347618	680565	0.439899	7.74373	2.26842
ACVR2A	2	147344517	148430826	1562.09	0.433272	1594.96	0.445688	6.63577	0.405214	9.87423e-21	0.362968	1.20221e+06	0.21212	0.278133	0.223352
ACVR2B	3	37953890	38993142	8230.66	0.0425472	8719.09	0.0307235	54.5292	0.00715621	2.53804e-20	0.128534	437258	0.23363	0.128779	0.142848
ACVRL1	12	51406908	52423361	2319.24	0.695722	2242.35	0.74322	11.2496	0.952122	2.14411e-20	0.40037	1.5378e+06	0.000375206	1.18051	0.557125
ACY1	3	51483340	52489197	504.395	0.641343	509.833	0.621562	4.06988	0.306359	2.44138e-21	0.400285	2.13863e+06	0.0432054	1.45953	0.643965
ACY3	11	67142555	68150730	13031.4	0.00552396	13224.7	0.00483205	23.6396	0.153773	1.88929e-20	0.241065	780210	0.821991	1.47278	0.647996
ACYP1	14	74553237	75569483	5964	0.127831	5851.93	0.137554	42.1514	0.0520524	1.56528e-20	0.279277	1.1898e+06	0.179659	0.038906	0.0738454
ACYP2	2	53470838	54805300	1378.55	0.651561	1409.49	0.653655	4.58531	0.672668	1.38502e-20	0.324755	1.80277e+06	0.0846915	0.0729569	0.103982
ADA	20	44084896	45152252	5985.53	0.179952	6451.98	0.154362	27.6482	0.24288	2.04002e-20	0.108996	1.16037e+06	0.211581	0.139411	0.149435
ADA2	22	16678790	17758235	4415.06	0.863014	4456.34	0.873455	42.4842	0.193125	3.75758e-20	0.436377	3.33167e+06	0.0257771	0.00410408	0.0227704
ADAD1	4	121878966	122929802	2948.13	0.137884	2904.35	0.161133	26.0302	0.118836	9.09832e-21	0.498029	894234	0.809139	0.0116924	0.0391054
ADAD2	16	83691138	84697168	33539.4	0.000370489	33551	0.000350244	88.4849	0.236406	9.33895e-20	0.038934	1.88767e+06	0.0894045	0.125653	0.140873
ADAL	15	42830672	43854569	1807.11	0.379783	1764.03	0.379746	27.7318	0.121694	4.37665e-21	0.368032	917761	0.065663	4.40917	1.44677
ADAM10	15	58088809	59249791	8641.35	0.0772382	8570.26	0.0946807	37.4647	0.444938	4.63436e-20	0.0624198	1.94944e+06	0.00420258	0.0223587	0.0549566
ADAM11	17	44258988	45281846	2624.85	0.225474	2460.16	0.268798	8.60243	0.855524	7.24625e-21	0.832257	1.88557e+06	0.165426	0.183432	0.174937
ADAM12	10	125512381	126888477	7179.51	0.694224	7099.41	0.68581	21.2251	0.976454	2.27981e-20	0.916119	1.35637e+06	0.186625	1.11996	0.537712
ADAM15	1	154550566	155562775	22622.9	2.81766e-08	24261.3	2.39565e-09	44.5096	0.042497	1.93032e-20	0.689791	920263	0.649601	1.89631	0.773422
ADAM17	2	8988486	10056732	5308.71	0.318997	5685.07	0.277653	35.8708	0.0498337	3.02537e-20	0.156906	1.15372e+06	0.587929	0.000990879	0.0110452
ADAM18	8	39084489	40230065	2485.57	0.748547	2437.94	0.747866	20.7139	0.247051	2.36072e-20	0.0426772	324219	0.571042	4.05991	1.35741
ADAM19	5	156895534	158075775	2505.46	0.73033	2642.07	0.723217	13.016	0.602815	2.05534e-20	0.59903	1.75427e+06	0.292862	0.412017	0.283206
ADAM2	8	39243735	40338227	2040.47	0.809194	2061.2	0.798443	10.4257	0.619872	2.30613e-20	0.0331615	2.14917e+06	0.0625918	1.98292	0.798377
ADAM20	14	70022358	71035015	9029.46	0.00352195	9293.98	0.00451018	26.8852	0.332446	1.85013e-20	0.392677	449550	0.200348	1.19692	0.562349
ADAM21	14	69917107	70960427	9148.82	0.00375596	9407.3	0.00473409	27.2046	0.353349	2.00008e-20	0.471711	2.03796e+06	0.0816661	1.46129	0.6445
ADAM22	7	87434143	88702889	1459.5	0.755296	1393.01	0.797004	8.69163	0.722985	6.73393e-21	0.846079	1.91978e+06	0.26604	0.156726	0.159775
ADAM23	2	205943532	207121127	1671.84	0.673134	1627.85	0.683904	13.6077	0.187169	1.37949e-20	0.397628	1.93792e+06	0.169661	0.200256	0.184081
ADAM28	8	23794069	24859014	10586.8	0.000184801	9384.48	0.000452138	64.7685	0.000139691	3.30652e-20	1.93146e-05	2.95544e+06	0.0327057	0.147478	0.154308
ADAM29	4	174329668	175478180	8529.81	0.0876317	8417.05	0.102425	26.1946	0.43593	2.38194e-20	0.14862	104720	0.00503112	0.0620719	0.0951489
ADAM30	1	119393533	120396515	2448.81	0.516124	2378.46	0.563405	25.28	0.0988892	1.59682e-20	0.495962	1.87239e+06	0.098309	1.36576	0.615215
ADAM32	8	38606990	39784917	3612.06	0.282782	3324.84	0.329896	34.6616	0.106932	1.76658e-20	0.399639	262927	0.753196	0.033746	0.0684159
ADAM33	20	3167965	4182246	3489.27	0.631668	3688.7	0.630107	36.373	0.408605	1.93985e-20	0.708764	709099	0.376226	0.455114	0.301103
ADAM7	8	23940930	25026970	11077	0.000611198	9862.81	0.0015205	67.1625	0.000191045	3.84677e-20	0.000249116	2.38143e+06	0.0663778	0.0956878	0.120866
ADAM8	10	132762420	133776868	16545.1	0.000283097	16571	0.000245323	22.9876	0.158689	2.70572e-20	0.0100134	1.62728e+06	0.793304	0.182079	0.174189
ADAM9	8	38496754	39605445	5045.34	0.160885	4884.25	0.188419	35.487	0.128075	2.25806e-20	0.346122	1.62147e+06	0.318267	0.123448	0.139467
ADAMDEC1	8	23884285	24906013	10519	8.4739e-05	9336.38	0.000225718	65.9361	0.000149294	3.32805e-20	1.96887e-05	791274	0.217351	3.24724	1.14543
ADAMTS1	21	26335755	27345409	8693.74	0.0312535	9100.93	0.0298617	64.9986	0.105283	4.64902e-20	0.135769	2.06295e+06	0.129443	0.218207	0.193542
ADAMTS10	19	8080240	9110735	7528.62	0.606068	7826.52	0.559786	21.5342	0.6039	2.4536e-20	0.617059	1.71401e+06	0.113091	0.00324171	0.0201803
ADAMTS12	5	33023535	34392019	13702.1	0.0216815	13762.2	0.0204636	28.6804	0.251134	2.72512e-20	0.0388347	1.61572e+06	0.568518	1.02781	0.507694
ADAMTS13	9	132914358	133959402	17877.2	0.00748007	18421.1	0.00547397	76.6233	0.0125762	4.59951e-20	0.170756	1.49031e+06	0.172539	0.335908	0.250109
ADAMTS14	10	70172506	71262441	13461	0.0523184	13104.4	0.0665937	62.6136	0.338789	4.65327e-20	0.312446	2.16641e+06	0.0162875	0.00129587	0.0126539
ADAMTS15	11	129948645	130976645	2731.35	0.373915	2878.7	0.379496	21.6241	0.628282	1.94831e-20	0.619669	1.26471e+06	0.0635846	3.7062	1.26591
ADAMTS16	5	4640330	5820304	15255.7	0.138661	14925.2	0.1609	51.1846	0.221496	5.088e-20	0.217296	1.76897e+06	0.247954	0.0158674	0.0458739
ADAMTS17	15	99471437	100842005	12855.6	0.0338962	13188.8	0.0287053	61.8948	0.200018	5.60341e-20	0.261056	788693	0.825499	0.531341	0.331573
ADAMTS18	16	76747813	77935034	9520.23	0.324322	9881.46	0.287635	39.9423	0.652549	3.21874e-20	0.613686	1.84953e+06	0.247336	0.894077	0.462969
ADAMTS19	5	128960281	130238683	3806.95	0.569706	3862.59	0.542148	6.44083	0.968416	8.45082e-21	0.6322	1.54717e+06	0.000734427	0.230931	0.200085
ADAMTS2	5	178610853	179845461	17294.4	0.0221542	16767	0.0302695	65.2392	0.43807	4.66986e-20	0.325464	1.28027e+06	0.371938	0.826987	0.43992
ADAMTS20	12	42853866	44052203	4629.17	0.54506	5089.96	0.493262	30.0374	0.340862	1.58934e-20	0.440178	1.073e+06	0.745473	0.371707	0.26594
ADAMTS3	4	71780969	73069221	6959.79	0.0557776	7291.7	0.0457699	10.8711	0.448037	1.49191e-20	0.451305	555902	0.0156767	0.0120516	0.0397271
ADAMTS4	1	160684302	161699054	6282.75	0.361922	6369.35	0.359942	42.1592	0.0335251	5.88238e-20	0.000769109	2.05896e+06	0.235016	0.0981286	0.122579
ADAMTS5	21	26417922	27467088	8428.08	0.0486458	8855.46	0.0409459	63.1328	0.117055	4.62098e-20	0.143904	2.53565e+06	0.0234716	0.668875	0.383583
ADAMTS6	5	64648738	65981920	2321.17	0.540898	2365.87	0.56521	10.5	0.698737	5.21063e-21	0.877026	411101	0.304292	0.0285599	0.0625828
ADAMTS7	15	78259206	79311464	15416.8	0.0129545	14957.7	0.0182959	34.7646	0.0102816	4.12196e-20	0.0540122	1.52216e+06	0.762141	0.150132	0.15589
ADAMTS8	11	129904923	130928609	2853.36	0.414985	3014.59	0.423365	21.9981	0.641132	1.97521e-20	0.631823	1.97056e+06	0.358936	0.0785515	0.108312
ADAMTS9	3	64015654	65188000	20133.4	4.94973e-05	20357.3	5.93482e-05	40.123	0.308669	4.71902e-20	0.029825	2.25705e+06	0.0227142	2.35862	0.904508
ADAMTSL1	9	17406563	19410950	17525	0.0437137	17061.5	0.0615535	92.7395	0.404344	6.11864e-20	0.415334	704971	0.912944	0.515626	0.325402
ADAMTSL2	9	133032164	134075519	19163.8	0.0125069	19615.8	0.00945961	56.8577	0.0543063	5.32784e-20	0.0927187	2.62196e+06	0.0920228	3.71912	1.26928
ADAMTSL3	15	83154088	84539842	5426.14	0.0325882	5690.42	0.0330389	11.8799	0.584224	1.0252e-20	0.872135	4.19138e+06	0.0208908	3.71824	1.26905
ADAMTSL4	1	150049369	151060937	2954.93	0.558612	2933.07	0.570113	7.76859	0.695509	4.04279e-21	0.778755	1.27345e+06	0.0610773	0.264572	0.216814
ADAMTSL5	19	1005022	2013604	7619.71	0.337732	7911.63	0.311193	35.9579	0.435879	4.05365e-20	0.181408	1.94625e+06	0.00388426	0.655238	0.378568
ADAP1	7	397900	1455407	10952.8	0.0582312	10968.6	0.0566163	50.0997	0.022244	4.91725e-20	0.0182293	1.79938e+06	0.010564	1.84365	0.758146
ADAP2	17	30406344	31459322	2347.57	0.363077	2364.17	0.379523	9.31873	0.564812	7.84462e-21	0.603727	2.1511e+06	0.0130055	2.40128	0.916369
ADAR	1	154081695	155128013	23631.7	3.97162e-07	25314.2	2.02592e-07	46.1498	0.0660807	2.60971e-20	0.692566	2.6658e+06	0.00262418	0.454372	0.300799
ADARB1	21	44573853	45726560	9874.01	0.0800154	9838.43	0.0903649	21.6132	0.718045	4.9095e-20	0.0637695	1.43329e+06	0.0750416	0.291187	0.229545
ADARB2	10	677313	2237525	17457.6	0.171644	17532.8	0.193815	106.379	0.037282	7.38138e-20	0.0503078	405576	0.638935	0.769696	0.419861
ADAT1	16	75096868	76123300	4218.86	0.275182	4133.65	0.308473	7.16664	0.841613	8.02139e-21	0.916198	1.30173e+06	0.558211	1.12596	0.539646
ADAT2	6	142922832	143950695	1671.2	0.669178	1655.56	0.687393	11.2236	0.353398	1.64143e-20	0.0978222	3.30178e+06	0.00218487	0.305352	0.236163
ADAT3	19	1405399	2413447	6388.1	0.400485	6483.62	0.410219	31.191	0.181327	3.60939e-20	0.121166	1.38002e+06	0.102665	0.842818	0.445399
ADCK1	14	77300109	78435014	4328.99	0.615404	4305.91	0.593819	30.6206	0.418087	2.3463e-20	0.430478	531675	0.0485539	1.75098	0.731062
ADCK2	7	140172945	141196261	5507.76	0.204154	5627.66	0.206863	8.25194	0.900607	1.66494e-20	0.535409	2.12546e+06	0.00593353	1.11836	0.537194
ADCK5	8	143873101	144893242	27521.8	3.9368e-07	28583.7	3.39771e-07	15.4785	0.0244027	6.01874e-21	0.154566	1.2341e+06	0.719942	0.00121688	0.0122567
ADCY1	7	45074140	46223116	6455.21	0.256183	7170.64	0.187228	54.3103	0.0656505	2.7911e-20	0.194066	397366	0.415924	0.902203	0.46573
ADCY10	1	167309386	168414215	21232.9	4.89387e-07	20861.6	5.78407e-07	22.5646	0.223544	2.82552e-20	0.36425	347776	0.00955037	0.0325859	0.067147
ADCY2	5	6896138	8330081	7078.56	0.433673	7142.28	0.39584	51.365	0.166685	4.08876e-20	0.164748	1.39575e+06	0.313866	0.1994	0.183622
ADCY3	2	24319169	25420237	575.236	0.998364	587.653	0.997878	3.84619	0.986335	5.89812e-21	0.972491	354093	0.479057	0.031056	0.0654432
ADCY4	14	23818349	24835093	7378.42	0.299023	7487.99	0.262482	34.335	0.23734	3.6153e-20	0.05801	2.03423e+06	0.2384	0.0680792	0.100095
ADCY5	3	122782296	123949090	22005.1	1.62021e-05	22799.4	1.22181e-05	86.1199	0.000482151	5.6065e-20	0.000327074	1.33757e+06	0.422109	0.381617	0.270237
ADCY6	12	48266194	49289089	977.129	0.697715	1045.8	0.652262	10.2506	0.818355	2.17082e-20	0.0774105	1.79184e+06	0.0904168	0.00441465	0.0236384
ADCY7	16	49746137	50818135	5253.32	0.256405	5478.92	0.245454	23.6828	0.268911	1.58148e-20	0.475046	1.21592e+06	0.15168	0.871777	0.455357
ADCY8	8	130280301	131540909	5682.55	0.156354	5557.45	0.152436	16.8005	0.672311	3.31179e-20	0.214354	1.42802e+06	0.162804	0.0130937	0.0414845
ADCY9	16	3453387	4616442	15328.7	0.00169812	16367.2	0.00111569	33.0216	0.21182	1.56247e-20	0.795768	2.11691e+06	0.00208802	0.00169558	0.0145042
ADCYAP1	18	404871	1412172	9075.29	0.263212	9254.07	0.242934	44.5312	0.116875	5.22416e-20	0.0553953	1.35879e+06	0.182996	0.0779985	0.10789
ADCYAP1R1	7	30552308	31611474	3540.56	0.528504	3374.2	0.570327	7.51357	0.901024	1.04877e-20	0.831375	1.76844e+06	0.67221	8.11418	2.35733
ADD1	4	2343844	3430076	4405.53	0.257706	4198.11	0.2577	29.3823	0.0585069	1.89723e-20	0.193332	2.52239e+06	0.00271405	0.236122	0.202718
ADD2	2	70107618	71268225	9972.71	0.00789419	10037.1	0.00738674	19.7365	0.710825	1.33194e-20	0.867473	1.14406e+06	0.294927	4.64915	1.50767
ADD3	10	109496368	110635565	5100.29	0.084868	5008.07	0.0909387	7.57129	0.808845	6.48818e-21	0.73176	1.79574e+06	0.412605	0.15027	0.155972
ADGB	6	146098967	147315462	685.03	0.944104	648.562	0.94686	3.35387	0.821257	7.78869e-21	0.44167	2.00695e+06	0.24372	0.022232	0.0547917
ADGRA1	10	132587924	133631675	15530.8	0.0007097	15556.2	0.000662751	22.9841	0.105136	2.48673e-20	0.0267417	1.04622e+06	0.0119712	0.0291695	0.0632912
ADGRA2	8	37284191	38344896	1202.45	0.85777	1069.25	0.905413	13.7708	0.255337	7.16562e-21	0.728532	247734	0.522854	0.0208562	0.0529727
ADGRA3	4	21845071	23016066	3931.21	0.447513	3967.24	0.472595	19.2868	0.634438	1.50678e-20	0.5968	796703	0.213282	0.154257	0.158328
ADGRB1	8	141949430	143045009	8215.65	0.235203	8227.2	0.257621	13.6518	0.979611	1.66823e-20	0.951546	2.13371e+06	0.00168952	1.97102	0.794959
ADGRB2	1	31227117	32264893	6171.18	0.0371039	5973.05	0.0377394	10.567	0.196169	1.36841e-20	0.205509	2.20073e+06	0.0797331	3.66788	1.25594
ADGRB3	6	68135282	69890571	5318.81	0.791802	5019.28	0.834974	37.8231	0.265067	3.8318e-20	0.153755	485120	0.484061	0.33934	0.251649
ADGRD1	12	130453907	131641469	16833.4	0.102392	16738.4	0.109469	39.5105	0.834996	5.91211e-20	0.267137	1.02308e+06	0.375519	13.448	3.61036
ADGRD2	9	123950451	124978589	3174.99	0.371425	3192.5	0.34544	16.6074	0.203951	1.1213e-20	0.417599	4.56813e+06	0.000395169	1.88413	0.769894
ADGRE1	19	6387566	7440459	10608.6	0.263014	10630	0.279883	24.813	0.740455	2.78375e-20	0.965302	1.3043e+06	0.128259	1.293	0.592617
ADGRE2	19	14232392	15278560	4965.17	0.854883	5050.38	0.857184	34.0834	0.707293	3.46441e-20	0.459261	1.56065e+06	0.00324392	0.0356028	0.0704083
ADGRE3	19	14119117	15190027	4616.88	0.894214	4725.08	0.891984	33.3739	0.798059	3.22082e-20	0.586099	1.24251e+06	0.671729	0.25888	0.214037
ADGRE5	19	13880501	14908725	3395.59	0.9157	3341.75	0.922081	24.9038	0.81863	2.13267e-20	0.63676	985482	0.671393	3.14681	1.11875
ADGRF1	6	46497708	47542350	4249.84	0.523767	4363.91	0.53148	15.7711	0.583289	1.07694e-20	0.783505	1.07861e+06	0.58281	0.988572	0.494726
ADGRF3	2	25808173	26846817	7072.26	0.076255	7116.36	0.0761662	6.76766	0.957029	1.4125e-20	0.365283	1.10084e+06	0.483221	0.867868	0.454018
ADGRF4	6	47185864	48222021	2156.67	0.785848	2191.46	0.793148	5.28507	0.924743	9.312e-21	0.632552	1.10642e+06	0.148176	0.528861	0.330603
ADGRF5	6	46352522	47454943	4281.52	0.5519	4398.29	0.562688	15.8267	0.629291	1.09468e-20	0.828921	2.0477e+06	0.141166	0.00539679	0.0262084
ADGRG1	16	57110652	58165580	7403.05	0.066253	7357.11	0.0802363	54.799	0.0921808	3.63659e-20	0.183572	1.08072e+06	0.124208	1.67558	0.708824
ADGRG3	16	57168277	58189378	7052.28	0.0623653	7034.21	0.074859	51.1685	0.0925848	3.33366e-20	0.184382	1.05544e+06	0.117603	0.264841	0.216944
ADGRG5	16	57042643	58091681	7416.85	0.06787	7368.61	0.0816358	54.8876	0.0943505	3.64884e-20	0.186231	1.48805e+06	0.0152447	0.770983	0.420316
ADGRG6	6	141801854	142946266	2905.64	0.506771	3000.53	0.477278	4.3329	0.802442	1.61624e-20	0.25997	1.64423e+06	0.00737743	0.509668	0.323048
ADGRG7	3	100109601	101195479	6973.25	0.0264852	7052.06	0.0192432	25.2027	0.0999579	1.86599e-20	0.0714641	1.48482e+06	0.0157321	0.808323	0.433425
ADGRL1	19	13647743	14706187	4187.21	0.695889	4094.87	0.691809	21.8379	0.798195	1.88897e-20	0.676569	523187	0.592597	0.27412	0.221428
ADGRL2	1	80806147	82493932	10987.4	0.265101	10867.7	0.245389	36.2882	0.656596	3.27339e-20	0.686113	1.07734e+06	0.00658641	0.127267	0.141895
ADGRL3	4	60700326	62578335	6828.8	0.324533	6949.65	0.316066	33.3674	0.289818	2.50439e-20	0.889815	1.13706e+06	0.703235	1.56954	0.677215
ADGRL4	1	78389764	79782124	3823.02	0.912489	3862.84	0.911156	17.8137	0.811672	1.70195e-20	0.829844	2.03534e+06	0.368171	2.64978	0.984791
ADGRV1	5	90029344	91664437	5600.54	0.249939	5714.45	0.244133	29.7283	0.278976	3.0518e-20	0.268876	2.9675e+06	0.0019772	0.359054	0.260402
ADH1A	4	98776369	99791003	6116.07	0.107777	6316.83	0.0967618	15.6959	0.468945	1.47366e-20	0.455508	2.36169e+06	0.0827427	0.185355	0.175997
ADH1B	4	98804971	99821401	5970.64	0.106713	6150.57	0.0954007	14.9987	0.468866	1.40327e-20	0.455116	995394	0.474915	0.10597	0.127972
ADH1C	4	98836497	99852746	6183.61	0.115769	6362.19	0.103886	15.0512	0.468074	1.46588e-20	0.451645	1.2022e+06	0.229236	0.208112	0.188257
ADH4	4	98623657	99657792	5741.4	0.0679935	5985.24	0.0605965	11.5421	0.558289	7.17242e-21	0.819733	1.4361e+06	0.0658616	0.5953	0.356176
ADH5	4	98570978	99588801	6553.85	0.0595279	6736.55	0.0531025	12.7378	0.516929	7.22242e-21	0.817957	1.4143e+06	0.0617572	0.470744	0.307466
ADH6	4	98702638	99719537	5956.86	0.0882596	6200.55	0.0791675	11.5421	0.558291	7.22938e-21	0.822899	1.42254e+06	0.239992	0.164662	0.164373
ADH7	4	98912261	99935510	5352.4	0.135938	5461.31	0.121884	12.9709	0.397611	1.3677e-20	0.319887	1.38087e+06	0.264533	1.67375	0.708283
ADHFE1	8	65932492	66968907	5236.97	0.0191529	5181.27	0.0197638	2.27085	0.173107	8.26537e-21	0.0736776	1.1533e+06	0.385298	0.165877	0.165069
ADI1	2	2997366	4019531	12221	0.0468845	12676.7	0.0395794	56.8814	0.158307	2.80206e-20	0.530138	1.35451e+06	0.0591907	0.889407	0.461378
ADIG	20	38081195	39088463	3100.06	0.776277	3143.24	0.767479	13.6536	0.443277	9.6056e-21	0.552275	1.38598e+06	0.0480342	0.710598	0.39876
ADIPOQ	3	186342704	187358463	7030.31	0.319987	7276.89	0.291564	22.5043	0.806276	3.41234e-20	0.257573	1.5822e+06	0.831605	3.0593	1.09541
ADIPOR1	1	202440826	203458572	7255.11	0.191502	7504.23	0.161072	29.9012	0.198355	2.31912e-20	0.582345	2.16492e+06	0.0665073	1.08633	0.526827
ADIPOR2	12	1188574	2288674	6011.07	0.394724	6097.27	0.391017	64.0598	0.0864267	5.1333e-20	0.0388915	395734	0.389948	0.520995	0.327517
ADIRF	10	86468432	87483934	1840.98	0.771721	2001.07	0.750261	15.2996	0.775155	8.48635e-21	0.825613	1.03407e+06	0.0607609	0.248903	0.209118
ADISSP	20	3253508	4267781	3735.64	0.698485	3940.65	0.699374	39.0599	0.509705	2.17762e-20	0.784654	2.29507e+06	0.00967369	0.0495147	0.0841202
ADK	10	73651202	75209963	3697.87	0.0287131	3433.42	0.0392768	6.91003	0.0634611	1.2368e-20	0.300366	1.02591e+06	0.631853	2.94509e-05	0.00188457
ADM	11	9805073	10807397	2236.76	0.917643	2087.69	0.928721	7.05029	0.990537	6.91916e-21	0.986346	1.47007e+06	0.857635	0.027155	0.0609247
ADM2	22	49981543	50986440	3526.84	0.439309	3897.48	0.407357	38.7849	0.315376	2.23161e-20	0.448586	2.28685e+06	0.062054	0.456604	0.301712
ADM5	19	49189594	50190575	11614.6	0.0137622	11826.7	0.0117709	59.4295	0.0108225	1.5841e-20	0.225497	2.11808e+06	0.0211448	0.416467	0.285079
ADNP	20	50388916	51431437	4666	0.294116	4491.36	0.299423	11.6269	0.482297	1.90345e-20	0.596275	2.01543e+06	0.00159856	0.946442	0.480662
ADNP2	18	79609262	80647523	6667.67	0.0176462	6747.22	0.0145396	12.6245	0.639682	1.32693e-20	0.312078	1.36483e+06	0.244045	0.619412	0.365255
ADO	10	62304720	63308479	9882.93	0.0126144	9934.4	0.0127475	18.9886	0.516305	1.10331e-20	0.830367	1.99995e+06	0.0284625	0.720677	0.40239
ADORA1	1	202590654	203667405	7350.71	0.167051	7595.69	0.141527	29.932	0.185436	2.43507e-20	0.531098	1.21476e+06	0.756734	0.11415	0.133436
ADORA2A	22	23917879	24942357	4614.06	0.354417	4805.08	0.314346	17.9176	0.283944	1.46434e-20	0.368038	1.36037e+06	0.150073	1.25048	0.579285
ADORA2B	17	15445130	16475746	7966.25	0.00647127	8289.95	0.00599928	43.1132	0.00616652	2.1175e-20	0.0271388	1.12673e+06	0.0521647	0.221886	0.195447
ADORA3	1	110999429	112003633	6330.62	0.197378	6572.95	0.210575	17.7561	0.886642	2.07292e-20	0.717172	1.63444e+06	0.191431	1.07338	0.522613
ADPGK	15	72251294	73285846	15649.6	0.00233137	16127.5	0.00230617	32.7763	0.0851754	1.51051e-20	0.0644927	1.67583e+06	0.0407175	1.50426	0.657545
ADPRH	3	119079268	120089945	3308.27	0.347024	3448.7	0.348921	13.2758	0.620993	1.17793e-20	0.601877	743017	0.711793	3.25532	1.14757
ADPRHL1	13	112899611	113953488	5483.61	0.746195	5440.8	0.76684	23.2821	0.649457	1.99788e-20	0.542985	2.16398e+06	0.0157701	0.168294	0.16645
ADPRM	17	10197594	11211558	2233.85	0.929246	2304.29	0.932689	11.3153	0.785149	9.22099e-21	0.963342	901978	0.131639	1.59768	0.685644
ADPRS	1	35588892	36593932	1940.3	0.577883	2035.24	0.560473	23.0678	0.394227	1.94818e-20	0.0420592	539886	0.923027	0.346263	0.254741
ADRA1A	8	26248150	27367278	3112.73	0.989097	3111.26	0.98973	26.7013	0.466116	2.41225e-20	0.638409	2.03852e+06	0.016676	0.154996	0.158762
ADRA1B	5	159365080	160473012	4784.92	0.338037	4825.66	0.313523	12.775	0.863286	2.67015e-20	0.323071	1.73019e+06	0.0454033	0.328621	0.246821
ADRA1D	20	3720630	4749287	9880.28	0.14912	10262.3	0.144424	65.6692	0.268819	3.7594e-20	0.464923	2.01807e+06	0.351674	0.385222	0.271791
ADRA2A	10	110577029	111580907	8011.61	0.104712	8089.05	0.123964	11.1232	0.867883	1.35619e-20	0.647295	399973	0.489243	0.708224	0.397903
ADRA2B	2	95612876	96616571	570.301	0.309047	660.839	0.300683	4.02595	0.255936	2.90643e-21	0.41541	1.83965e+06	0.221117	0.0460258	0.0808544
ADRA2C	4	3266348	4268526	5741.58	0.535394	5977.6	0.517453	53.5984	0.55984	2.79236e-20	0.839095	1.60906e+06	0.0753757	2.29978	0.888093
ADRB1	10	113543866	114546904	6759.42	0.0645426	6831.68	0.0745891	26.5631	0.18255	5.50219e-20	0.0102592	1.19097e+06	0.164907	0.353916	0.258136
ADRB2	5	148326611	149328623	1383.83	0.657455	1427.28	0.660326	1.79754	0.957521	7.43658e-21	0.687323	1.45129e+06	0.848739	0.462935	0.304295
ADRB3	8	37462990	38466599	1026.3	0.729864	1120	0.70721	55.4106	0.00856154	1.12828e-20	0.303102	827258	0.365256	0.161331	0.162453
ADRM1	20	61802093	62808862	6115.75	0.607636	6309.45	0.584094	19.9538	0.97497	2.15684e-20	0.607717	271310	0.683472	1.58731	0.682542
ADSL	22	39846461	40890463	990.326	0.472237	1003.79	0.477716	2.63701	0.699797	3.2223e-21	0.707333	2.35671e+06	0.00504737	0.255836	0.212543
ADSS1	14	104224174	105247325	6243.22	0.120658	6487.37	0.0987657	60.9841	0.00339823	5.05708e-20	0.00113438	1.26486e+06	0.0354922	0.0196453	0.0513268
ADSS2	1	243908494	244951909	15385.6	0.000402973	15177.7	0.00062061	26.2373	0.578464	2.85884e-20	0.32876	1.11047e+06	0.77217	0.192803	0.180066
ADTRP	6	11212054	12307046	6538.53	0.215008	6729.28	0.208471	62.9432	0.0269751	2.91835e-20	0.244714	1.01507e+06	0.380298	0.046799	0.0815869
AEBP1	7	43604345	44614562	876.121	0.446208	886.191	0.453486	5.90227	0.563137	5.65018e-21	0.626436	904775	0.00399759	0.446465	0.297553
AEBP2	12	18904045	20220801	12179.1	0.0215358	12239.9	0.0238195	35.7852	0.333495	4.02354e-20	0.229131	1.5474e+06	0.193244	1.18664	0.559078
AEN	15	88121337	89132281	5750.11	0.141462	6037.83	0.125577	39.6451	0.428715	3.28185e-20	0.0252069	1.43675e+06	0.512878	1.37123	0.616901
AFAP1	4	7258714	8439926	15269.8	0.616889	16047.8	0.585269	108.989	0.333012	5.96638e-20	0.798969	3.56514e+06	0.0380635	2.60648	0.972944
AFAP1L1	5	148771859	149843637	3812.72	0.377162	3764.17	0.39178	9.1625	0.937524	1.57385e-20	0.888028	752955	0.952371	2.60648	0.972944
AFAP1L2	10	113794824	114904756	7186.44	0.104865	7224.08	0.119046	25.2732	0.140059	5.5486e-20	0.00694801	1.78571e+06	0.184399	2.85289	1.03996
AFDN	6	167326893	168472023	4253.72	0.733039	4143.31	0.775039	34.0274	0.803926	4.26494e-20	0.474012	310904	0.261298	2.12441	0.838727
AFF1	4	86435002	87641039	16481	4.56228e-07	16850	5.05774e-07	22.3852	0.20759	1.31033e-20	0.38725	1.37296e+06	0.0614127	2.12441	0.838727
AFF3	2	99045419	100692428	3019.81	0.203708	3192.12	0.16594	32.1393	0.066263	2.616e-20	0.0244859	350795	0.532592	0.112812	0.132553
AFF4	5	132375395	133463634	3589.01	0.62724	3704.83	0.619673	11.8189	0.978088	1.15147e-20	0.955576	1.17357e+06	0.613803	0.0654487	0.0979522
AFG1L	6	107794991	109026796	3404.04	0.133532	3528.62	0.127297	32.4617	0.329166	1.89233e-20	0.143312	2.101e+06	0.00345625	1.81013	0.748379
AFG3L2	18	11828944	12877227	6475.29	0.399293	6586.22	0.401685	23.6473	0.456008	2.38663e-20	0.514691	930042	0.171658	0.383866	0.271207
AFM	4	72981745	74004001	5361.86	0.084919	5385.92	0.0854613	7.68931	0.418367	8.56038e-21	0.198534	1.36537e+06	0.091496	0.259893	0.214532
AFMID	17	77687358	78707702	5444.01	0.477072	5497.09	0.492613	57.972	0.00476917	5.58162e-20	0.0178287	1.37517e+06	0.235504	0.404713	0.280118
AFP	4	72931138	73956174	5296.55	0.0835388	5307.6	0.0837306	7.09932	0.408765	7.62809e-21	0.164704	2.06343e+06	0.0121305	1.10771	0.533755
AFTPH	2	64024299	65093005	3420.68	0.578202	3352.16	0.585899	29.0713	0.403993	1.51229e-20	0.668632	1.28315e+06	0.488854	2.07063	0.823448
AGA	4	176930774	177942437	9061.17	0.298444	9360.45	0.270929	43.4339	0.0407237	5.14412e-20	0.0360476	1.9027e+06	0.0267611	0.033873	0.0685538
AGAP1	2	234994043	236631793	4963.07	0.149501	4761.82	0.168629	21.3545	0.455469	2.78349e-20	0.158967	2.51848e+06	0.0943603	0.323445	0.244472
AGAP2	12	57223761	58242157	2209.66	0.36614	2353.78	0.35766	10.3785	0.370233	8.96121e-21	0.581355	369025	0.609344	0.743684	0.410628
AGAP3	7	150585831	151644436	5050.08	0.178138	4966	0.197149	20.6366	0.495737	1.64807e-20	0.917698	83763.9	0.318196	1.5098	0.65922
AGAP4	10	45325594	46353875	352.056	0.187237	386.169	0.204223	3.32955	0.218037	4.81916e-21	0.140869	1.72558e+06	0.00640214	0.117641	0.135722
AGAP5	10	73174287	74198109	3424.96	0.00814869	3139.36	0.00833576	6.41726	0.00960909	1.36657e-21	0.873258	1.72507e+06	0.0259834	1.45107	0.641387
AGAP6	10	49482190	50511654	18692	4.31114e-06	18518.9	7.46478e-06	22.6844	0.357676	1.70198e-20	0.0700523	1.10252e+06	0.402456	1.82931	0.753973
AGAP9	10	47001854	48023638	693.69	0.33512	728.46	0.328421	1.01923	0.612313	5.93494e-22	0.800231	2.08509e+06	0.0168435	0.3522	0.257377
AGBL1	15	85579871	87549169	7369.28	0.487393	7477.6	0.494748	21.3661	0.978316	3.47399e-20	0.514434	1.8647e+06	0.0192204	0.3522	0.257377
AGBL2	11	47159591	48215389	214.618	0.990234	219.111	0.989484	0.863576	0.997985	2.06455e-21	0.974844	1.01665e+06	0.0947881	0.00944728	0.0350007
AGBL3	7	134486508	135647963	7416.75	0.0313383	7857.22	0.0253189	14.056	0.388712	8.20565e-21	0.917745	2.26673e+06	0.305352	0.716939	0.401046
AGBL4	1	48032854	50523954	11509.9	0.102523	11932	0.0769925	31.185	0.519039	2.20119e-20	0.670625	1.0788e+06	0.127837	2.66357	0.988556
AGBL5	2	26542364	27570622	1590.66	0.970204	1582.44	0.972056	2.52672	0.924727	3.89284e-21	0.808636	739036	0.0259234	4.64119	1.50566
AGER	6	31680968	32684322	6452.77	0.016148	6615.02	0.0201835	52.887	0.27124	6.71336e-20	0.112515	3.74594e+06	0.0366344	2.02283	0.809809
AGFG1	2	226972152	228061217	8708.64	0.240425	8684.27	0.251877	41.0449	0.320588	3.35116e-20	0.442319	1.39525e+06	0.852338	0.00294319	0.0192083
AGFG2	7	100039203	101068220	1016.89	0.579591	1030.68	0.596233	1.49965	0.809751	4.44227e-21	0.667198	1.12561e+06	0.30118	0.0883012	0.115574
AGGF1	5	76529251	77565234	4940.21	0.0658001	4637.05	0.086793	26.97	0.0914265	1.93243e-20	0.179946	109991	0.645097	4.62323	1.50111
AGK	7	141051278	142155244	3428.46	0.398326	3743.28	0.374097	17.6799	0.103055	1.68536e-20	0.226932	1.04236e+06	0.00685534	0.0834095	0.111973
AGL	1	99350361	100424023	3929.99	0.521683	4242.66	0.453148	12.856	0.317945	1.71028e-20	0.410995	1.54038e+06	0.0121564	1.08146	0.525243
AGMAT	1	15071699	16085051	3181.14	0.523222	3386.82	0.528	21.4279	0.573052	3.20878e-20	0.0322334	395138	0.879876	2.15071	0.846174
AGMO	7	14700317	16062015	6307.04	0.481243	6187.64	0.498207	79.7433	0.00713049	3.5903e-20	0.0625405	1.09551e+06	0.00615546	0.760821	0.41672
AGO1	1	35369808	36430532	1808.72	0.629994	1907.09	0.604508	13.1272	0.0689533	1.73765e-20	0.013897	1.25017e+06	0.173185	3.81706	1.29471
AGO2	8	140020156	141135633	2572.2	0.519799	2702.85	0.503364	16.516	0.576821	6.54289e-21	0.979085	1.58922e+06	0.181477	0.303528	0.235316
AGO3	1	35430718	36572500	1940.3	0.577883	2035.24	0.560473	23.0678	0.394227	1.94818e-20	0.0420592	1.7679e+06	0.0338433	0.0125787	0.0406243
AGO4	1	35308016	36357890	983.29	0.873495	1055.14	0.856348	6.24899	0.375561	9.19552e-21	0.175234	469426	0.356599	0.513887	0.324716
AGPAT1	6	31668212	32678096	6445.58	0.0160597	6605.91	0.020045	52.7733	0.270053	6.68656e-20	0.110786	1.86098e+06	0.0384218	4.17452	1.38683
AGPAT2	9	136173143	137187457	7513.6	0.510829	7843.95	0.474645	28.7546	0.552041	2.87515e-20	0.215606	1.83595e+06	0.0197469	0.530365	0.331192
AGPAT3	21	43365223	44487592	3540.75	0.532734	3450.44	0.616554	11.6369	0.917728	1.86462e-20	0.561327	1.14639e+06	0.282696	0.233317	0.201297
AGPAT4	6	160629967	161774061	4515.99	0.375077	4524.29	0.367204	16.4092	0.679888	1.98673e-20	0.771704	299331	0.980964	1.73687	0.726915
AGPAT5	8	6208642	7261503	18866.5	0.0103418	18899.1	0.011571	95.8541	0.00617832	8.0162e-20	0.00941737	1.5323e+06	0.433763	3.95633	1.33073
AGPS	2	176892746	178067024	2379.19	0.712416	2345.95	0.744769	6.73493	0.726732	1.40048e-20	0.373609	448963	0.319282	1.44038	0.638126
AGR2	7	16291811	17333433	3978.37	0.969494	4185.83	0.966566	34.2162	0.701013	5.03746e-20	0.0689867	1.5554e+06	0.420615	0.884068	0.459558
AGR3	7	16359412	17381987	3683.7	0.951631	3810.84	0.950794	21.4383	0.916636	4.20006e-20	0.121131	438261	0.681983	1.07042	0.521649
AGRN	1	520120	1556118	12107	0.077279	11902.9	0.082136	39.7505	0.0229028	2.07413e-20	0.528422	1.81007e+06	0.0512422	0.0845491	0.112819
AGRP	16	66982571	67983547	11285	3.01064e-06	11167	3.05617e-06	0.324656	0.00735915	7.72641e-22	0.227388	1.55971e+06	0.174377	0.0296438	0.0638378
AGT	1	230190776	231245576	5890.67	0.482577	6341.27	0.449477	26.2972	0.818772	2.50238e-20	0.852362	2.17551e+06	0.0229958	3.70134	1.26465
AGTPBP1	9	85046539	86242029	4733.89	0.0337362	4790.3	0.0289766	11.0773	0.852843	2.45509e-20	0.0641972	2.14964e+06	0.102971	0.444467	0.296731
AGTR1	3	148197784	149243008	5763.59	0.340276	5781.05	0.330102	23.8751	0.391222	1.9365e-20	0.15186	20120.6	0.98123	1.03473	0.509971
AGTRAP	1	11236084	12254802	5672.73	0.473243	5746.8	0.482385	13.6925	0.754587	1.58046e-20	0.829534	1.74687e+06	0.0499228	0.958085	0.484563
AGXT	2	240368824	241380502	1363.38	0.956964	1329.02	0.96898	7.29287	0.995141	1.16681e-20	0.995576	709232	0.0606616	0.206429	0.187367
AGXT2	5	34498101	35548135	5823.23	0.398083	5848.18	0.403752	17.0585	0.858793	1.83153e-20	0.824301	1.37756e+06	0.214819	0.720447	0.402308
AHCTF1	1	246339098	247431948	11900.9	0.112744	11976.7	0.108626	43.4336	0.182705	2.41262e-20	0.656857	51656.5	0.551499	0.0480495	0.082761
AHCY	20	33780268	34811802	836.495	0.751492	909.743	0.729301	5.29214	0.613657	2.45543e-21	0.861394	1.43799e+06	0.16652	0.0270576	0.0608084
AHCYL1	1	109484765	110523742	4011.09	0.204154	3793.3	0.237124	17.6609	0.273478	1.78767e-20	0.355157	105213	0.382458	0.204295	0.186235
AHCYL2	7	128725030	129930211	3653.06	0.937631	3696.47	0.938515	15.7614	0.60731	1.09772e-20	0.980643	2.30511e+06	0.00556797	1.03635	0.510503
AHDC1	1	27034035	28104431	5226.28	0.257495	5270.01	0.257552	11.8105	0.415994	5.55416e-21	0.398832	912117	0.01169	0.118578	0.136331
AHI1	6	134783407	135998434	1620.04	0.184215	1602.1	0.184873	1.37133	0.914209	2.25654e-21	0.810225	1.03925e+06	0.536554	0.195105	0.181312
AHNAK	11	61933542	63056235	22449.1	7.73585e-06	23117.8	5.72279e-06	35.7439	0.0890867	2.98348e-20	0.284408	1.79449e+06	0.226237	1.27792	0.5879
AHNAK2	14	104437244	105478374	6827.64	0.126193	6826.02	0.114433	50.4073	0.0418436	5.02281e-20	0.00109218	833701	0.0219946	0.48909	0.314855
AHR	7	16416359	17846152	7024.99	0.802695	7337.48	0.787747	33.0635	0.859775	5.66452e-20	0.0788837	1.54609e+06	0.0125459	2.72686	1.0058
AHRR	5	1	938291	11220.3	0.00102454	11547.1	0.000991856	49.6628	0.474519	2.34861e-20	0.416922	973318	0.393064	2.00224	0.803914
AHSA1	14	76957870	77969472	5730.32	0.461701	5499.16	0.505638	32.105	0.429979	2.63304e-20	0.664445	2.13097e+06	0.187488	0.232686	0.200977
AHSG	3	186113060	187121318	7369.79	0.555938	7488.02	0.504884	20.7294	0.855722	2.92136e-20	0.700115	2.01485e+06	0.00151935	0.0719417	0.103182
AHSP	16	31027900	32028803	27040.5	4.43364e-07	27507.1	4.34003e-07	19.0748	0.00102229	3.46205e-20	0.00875471	999219	0.683703	0.140243	0.149942
AICDA	12	8102155	9113242	10422.4	0.0782201	10720	0.0659167	103.917	0.00474547	4.85159e-20	0.0249493	422272	0.369422	0.20105	0.184505
AIDA	1	222168013	223213210	5608.97	0.217116	5794.55	0.214049	29.1948	0.350254	2.24413e-20	0.420994	1.08869e+06	0.276812	0.0120778	0.0397722
AIF1	6	31115217	32117021	2225.3	0.870891	2288.13	0.884243	30.7828	0.726398	4.3108e-20	0.695806	1.41787e+06	0.209218	0.301965	0.23459
AIF1L	9	130596476	131623152	3518.16	0.864001	3421.98	0.891165	12.9537	0.948312	1.8294e-20	0.749499	112940	0.941108	2.15596	0.847659
AIFM2	10	69598223	70632934	8905.56	0.61647	8634.81	0.663407	63.9089	0.0613258	3.82333e-20	0.747017	1.11171e+06	0.314113	0.243887	0.20662
AIFM3	22	20465108	21481360	18118.2	0.00636226	18030.7	0.00595478	45.3184	0.0639506	2.64265e-20	0.249796	1.20241e+06	0.115149	0.0156674	0.0455696
AIG1	6	142560496	143841058	2454.99	0.769436	2399.88	0.783618	12.5063	0.404362	2.4446e-20	0.118017	1.82055e+06	0.190174	0.0141467	0.0431965
AIM2	1	158561599	159687843	8278.11	0.195331	8176.3	0.204866	11.7871	0.737109	1.83395e-20	0.582852	1.68814e+06	0.411197	0.333495	0.249023
AIMP1	4	105815544	106849456	1814.37	0.89003	1870.27	0.884997	2.26629	0.974727	4.32789e-21	0.787082	397564	0.12848	3.30876	1.16171
AIMP2	7	5509255	6523834	19016.8	0.000155598	18931.6	0.000170508	30.3992	0.175633	2.69135e-20	0.0839434	577207	0.195656	9.0972	2.59176
AIP	11	66968174	67991154	12998	0.00817576	13189.3	0.00709413	23.6367	0.148156	1.78364e-20	0.190799	986700	0.677915	2.32784	0.89593
AIPL1	17	5893693	6935199	9187.69	0.209682	9053.61	0.203861	34.2744	0.257663	2.69145e-20	0.388983	1.65075e+06	0.281215	1.31665	0.59999
AIRE	21	43785838	44798648	5697.17	0.483284	5656.05	0.511599	11.3894	0.437648	3.76504e-20	0.0305329	2.17112e+06	0.100189	0.0522177	0.0865844
AJAP1	1	4154609	5292534	3480.92	0.996215	3481.45	0.996349	35.1994	0.833552	5.11738e-20	0.420729	1.58445e+06	0.400197	0.0618593	0.0949703
AJM1	9	136342478	137348801	7935.33	0.40911	8332.45	0.375555	28.1482	0.499062	3.15635e-20	0.22693	1.15067e+06	0.705823	0.128149	0.142451
AJUBA	14	22471177	23482551	10326.5	0.170223	9908.21	0.222157	38.757	0.125793	2.87994e-20	0.743478	2.07456e+06	0.0558002	3.14138	1.11731
AK1	9	127366486	128377675	6217.33	0.24419	6414.46	0.204045	14.6026	0.667092	1.01585e-20	0.792193	377294	0.788213	2.04208	0.815307
AK2	1	32507986	33580996	6596.2	0.0871349	7283.92	0.0655225	23.2019	0.0180786	8.35747e-21	0.240253	1.41778e+06	0.26127	0.605574	0.360056
AK3	9	4209556	5242043	7340.24	0.325833	7345.57	0.353315	58.175	0.0800512	4.34228e-20	0.0208051	1.31012e+06	0.101022	0.0276478	0.0615106
AK4	1	64647549	65732145	2427.9	0.139211	2363.79	0.149004	10.9788	0.289967	2.04566e-20	0.0358923	1.13534e+06	0.681092	2.70423	0.999642
AK4P3	12	31115023	32152095	4948.68	0.856407	4954.27	0.846595	28.9647	0.593083	2.38171e-20	0.454551	1.88542e+06	0.0386638	2.19094	0.857533
AK5	1	76782019	78059966	7505.94	0.105564	7460.46	0.110593	15.5427	0.430715	2.63468e-20	0.213032	1.50906e+06	0.542515	3.15936	1.1221
AK6	5	68850984	69870013	2492.9	0.188657	2472.76	0.181784	5.30172	0.73584	1.63774e-20	0.10649	1.12453e+06	0.319121	0.045567	0.0804173
AK7	14	95892128	96989427	2937.25	0.877548	3134.4	0.842809	54.496	0.103125	2.36794e-20	0.427018	1.40326e+06	0.558831	0.0362124	0.0710527
AK8	9	132225578	133378777	10289.6	0.072842	10524.4	0.0652934	68.661	0.00766319	4.82458e-20	0.0739412	3.55527e+06	0.000284846	1.11674	0.536672
AK9	6	108992855	110191217	3045.84	0.23164	3236.8	0.202174	12.0934	0.432499	1.06589e-20	0.336631	1.09297e+06	0.158222	0.779415	0.42329
AKAIN1	18	4642911	5697503	15832.1	0.00138005	15802.5	0.00113967	46.3884	0.243096	3.31386e-20	0.471297	929129	0.225774	1.75278	0.731592
AKAP1	17	56585092	57621346	5383.36	0.884353	5516.64	0.892554	26.8064	0.680728	2.97531e-20	0.840129	1.06253e+06	0.0122531	1.49568	0.654945
AKAP10	17	19404302	20478343	3215.59	0.304528	3121.71	0.296865	7.01835	0.726093	4.33006e-21	0.899434	1.6226e+06	0.227011	1.17303	0.55474
AKAP11	13	41772152	42823261	3027.88	0.493197	2950	0.529418	13.9518	0.500979	2.28448e-20	0.232842	1.43414e+06	0.0135735	2.28481	0.883903
AKAP12	6	150739967	151858559	4035.54	0.647807	4106.24	0.65333	16.1508	0.720621	2.44399e-20	0.467051	2.71124e+06	0.0139014	0.95157	0.482382
AKAP13	15	84880571	86249358	3568.4	0.72689	3598.55	0.729057	49.454	0.205558	3.18635e-20	0.294552	1.12273e+06	0.28313	0.0762829	0.106572
AKAP3	12	4115508	5149051	9682.54	0.458413	9597.42	0.479633	33.0466	0.400869	3.98866e-20	0.550316	1.05564e+06	0.077225	0.247744	0.208542
AKAP5	14	63965499	64974503	6574.76	0.228493	6674.96	0.228199	9.78939	0.735149	8.2059e-21	0.430167	1.84829e+06	0.0455347	0.094893	0.120304
AKAP6	14	31829298	33337684	17341	0.0840282	17128.6	0.0935977	40.2038	0.665257	4.29737e-20	0.613794	1.72479e+06	0.140675	0.00700815	0.0299865
AKAP7	6	130635467	131783535	1570.25	0.867758	1553	0.873031	5.73015	0.903543	7.05164e-21	0.706817	2.51453e+06	0.08704	0.733273	0.406909
AKAP8	19	14853385	15879815	4798.86	0.414201	4949.53	0.415406	43.5866	0.0939851	2.89156e-20	0.423516	1.64589e+06	0.608297	5.77756	1.78963
AKAP8L	19	14880050	15919141	4816.92	0.421235	4966.22	0.42179	43.6134	0.0945079	2.90209e-20	0.432244	1.32839e+06	0.167087	0.000448786	0.007403
AKAP9	7	91440840	92610673	1713.25	0.488279	1598.72	0.547151	6.21355	0.303843	6.91644e-21	0.585809	1.28878e+06	0.128834	5.81741e-05	0.002651
AKIP1	11	8411139	9420084	3175.39	0.19764	3083.2	0.204764	12.443	0.570549	1.25411e-20	0.768454	1.30066e+06	0.131805	0.0812775	0.110377
AKIRIN1	1	38491276	39506059	11134.4	0.0210772	10883	0.0239477	36.0907	0.151833	3.17439e-20	0.0408394	642168	0.497476	6.23877	1.90315
AKIRIN2	6	87174860	88202233	7115.76	0.0585657	6999.09	0.0757982	29.0146	0.078746	2.56749e-20	0.187955	1.3096e+06	0.243262	2.51374	0.947469
AKNA	9	113834156	114894405	5467.63	0.27509	5502.01	0.280931	22.9858	0.239035	4.62331e-20	0.0149363	1.86316e+06	0.169553	0.156337	0.159548
AKNAD1	1	108315898	109463484	8986.22	0.0591683	9035.01	0.0595675	30.793	0.331692	1.89552e-20	0.534092	2.99119e+06	0.0187116	0.174728	0.17009
AKR1A1	1	45050543	46070049	450.783	0.866666	479.618	0.865498	2.7988	0.840009	2.39478e-21	0.918214	1.34813e+06	0.05701	1.12829	0.540394
AKR1B1	7	133942356	134959284	3363.69	0.478927	3521.07	0.478139	6.28439	0.973905	7.3834e-21	0.959984	915559	0.162535	1.45385	0.642235
AKR1B10	7	134027567	135041412	3707.14	0.427305	3887.14	0.42068	6.83394	0.962425	6.3225e-21	0.982422	1.21086e+06	0.259201	0.568691	0.346036
AKR1B15	7	134049110	135079875	3707.14	0.427305	3887.14	0.42068	6.83394	0.962425	6.3225e-21	0.982422	214880	0.931442	0.000117415	0.00377104
AKR1C1	10	4463253	5483283	7196.62	0.349385	7608.43	0.322688	61.9114	0.11205	4.44637e-20	0.217702	224376	0.921213	0.533288	0.332334
AKR1C2	10	4487775	5518031	7301.28	0.371995	7710.91	0.343036	63.2425	0.126513	4.56061e-20	0.298172	322916	0.679276	1.07613	0.52351
AKR1C3	10	4535354	5607686	7760.44	0.540488	8173.08	0.515243	62.9528	0.206118	4.60244e-20	0.508167	1.8112e+06	0.0954573	4.60229	1.49581
AKR1C4	10	4695462	5718949	5784.88	0.825215	5958.18	0.818116	51.5864	0.238221	4.46061e-20	0.535485	1.81598e+06	0.0970288	1.17485	0.55532
AKR1C8	10	4653920	5685187	6056.24	0.889966	6244.35	0.884464	54.7741	0.279751	4.64237e-20	0.564531	1.84992e+06	0.0916907	0.864894	0.452998
AKR1D1	7	137502324	138618305	3279.93	0.653355	3280.85	0.695734	12.5812	0.93352	2.28201e-20	0.722515	1.66295e+06	0.188371	2.69386	0.996818
AKR1E2	10	4286629	5348062	8333.57	0.284303	8752.56	0.261156	62.3844	0.126238	4.33475e-20	0.239246	1.60499e+06	0.215484	0.979805	0.491811
AKR7A2	1	18803965	19812144	6058.75	0.0205364	6165.71	0.0175509	42.6299	0.0743818	2.37168e-20	0.368159	514095	0.501663	0.8591	0.451008
AKR7A3	1	18782573	19788770	6046.23	0.0261078	6163.97	0.0234506	42.1939	0.0746484	2.33225e-20	0.363621	2.07843e+06	0.0686759	0.8591	0.451008
AKR7L	1	18765982	19774194	6197.71	0.0432406	6247.02	0.0395175	62.7888	0.0877185	2.5536e-20	0.330876	2.99864e+06	0.0256985	0.226885	0.198018
AKT1	14	104269349	105295751	6242.85	0.11678	6487.12	0.0964571	60.9738	0.00277552	5.05635e-20	0.000873278	2.95616e+06	0.027524	2.47143	0.935796
AKT1S1	19	49369033	50378459	12449.9	0.0277783	12658.8	0.0248275	68.2738	0.02016	2.0985e-20	0.396441	2.91441e+06	0.030215	0.647711	0.375788
AKT2	19	39730317	40785536	892.816	0.9947	839.003	0.996724	29.9776	0.295143	1.49749e-20	0.543235	966390	0.431893	0.0841187	0.1125
AKT3	1	242988233	244351079	16764.3	2.30244e-05	16672.8	2.81541e-05	24.6697	0.312125	1.8111e-20	0.252981	1.36616e+06	0.105227	0.193693	0.180548
AKTIP	16	52991040	54004411	5579.8	0.0535809	6008.02	0.0455735	25.7054	0.231738	3.40343e-20	0.00660265	1.31027e+06	0.541095	0.306111	0.236515
ALAD	9	112886312	113901290	6101.45	0.185234	6092.85	0.201508	25.1219	0.667744	2.43171e-20	0.716805	522437	2.5029e-06	0.0195859	0.0512449
ALAS1	3	51698086	52714327	707.15	0.629816	730.809	0.612447	4.61487	0.381773	2.88158e-21	0.464293	1.59098e+06	0.0173404	1.65712	0.703351
ALB	4	72897114	73921482	5304.4	0.0969716	5316.24	0.0971637	7.14513	0.654978	7.70671e-21	0.358614	517400	0.85824	0.259244	0.214215
ALCAM	3	104866909	106076900	6903.53	0.454961	7062.83	0.441621	32.3824	0.13646	1.97005e-20	0.780017	1.22128e+06	0.162454	0.433318	0.292119
ALDH16A1	19	48953225	49971050	8773.26	0.111174	9253	0.0874622	56.2575	0.0256088	1.88747e-20	0.174399	1.9302e+06	0.0397198	1.35327	0.611354
ALDH18A1	10	95105941	96156711	3606.79	0.265251	3685.37	0.2686	25.8928	0.158727	2.17091e-20	0.106888	1.35442e+06	0.305662	0.0495053	0.0841116
ALDH1A1	9	72400671	73580442	4761.21	0.0601567	4624.01	0.0798138	33.8536	0.0397332	2.79734e-20	0.0187052	1.25032e+06	0.268853	6.20043	1.89374
ALDH1A2	15	57453424	58997866	14042.9	0.0722175	14179.3	0.0858696	61.4639	0.460621	5.6264e-20	0.160994	877729	0.67163	0.494929	0.31719
ALDH1A3	15	100377714	101416626	14302.4	0.134176	14392.9	0.140417	41.7381	0.0776389	4.36927e-20	0.561537	2.54578e+06	0.0100411	4.81607	1.54982
ALDH1B1	9	37892702	38898661	2977.61	0.781348	2952.27	0.81584	18.311	0.842849	2.83795e-20	0.604276	1.82347e+06	0.0937949	3.32968	1.16724
ALDH1L1	3	125603562	126697994	4647.09	0.399137	4721.73	0.387246	33.406	0.159907	3.20997e-20	0.219621	935647	0.0261458	0.358022	0.259948
ALDH1L2	12	104519784	105607643	2078.64	0.779759	2375.38	0.724444	45.7387	0.353221	1.60259e-20	0.394482	2.08504e+06	0.0277871	2.65159	0.985284
ALDH2	12	111266887	112317532	2349.53	0.00806655	2705.37	0.00583784	17.4228	0.126664	2.9502e-21	0.304339	1.06796e+06	0.453615	0.799486	0.430337
ALDH3A1	17	19237984	20248943	9639.28	0.00148011	9108.27	0.00172655	14.5887	0.0827875	4.56255e-21	0.842125	1.16192e+06	0.31832	3.30288	1.16015
ALDH3A2	17	19148136	20185760	9639.28	0.00148011	9108.27	0.00172655	14.5887	0.0827875	4.56255e-21	0.842125	708890	0.520022	0.142997	0.151614
ALDH3B1	11	67508578	68529282	10624	0.0658443	10588.9	0.0701192	32.0304	0.20586	2.5034e-20	0.205982	2.40936e+06	0.03418	1.057	0.517268
ALDH3B2	11	67162155	68181224	13952.7	0.00338943	14014.4	0.00314875	28.7073	0.0964033	2.00745e-20	0.19826	2.74155e+06	0.0278025	2.90954	1.05524
ALDH4A1	1	18371430	19402724	4514.07	0.755137	4778.13	0.719761	74.0955	0.0676661	3.17678e-20	0.152499	1.35281e+06	0.193264	0.40449	0.280023
ALDH5A1	6	23994867	25037207	4971.22	0.807184	5127.75	0.794052	21.8344	0.703829	2.18989e-20	0.68578	1.80358e+06	0.0905812	0.902104	0.465697
ALDH6A1	14	73556847	74584492	1930.96	0.895697	1912.11	0.900874	5.58023	0.79047	5.57199e-21	0.982916	3.04129e+06	0.0169342	1.3081	0.597328
ALDH7A1	5	126031200	127095362	2778.87	0.194682	2885.63	0.191751	6.22518	0.843156	1.93728e-20	0.487655	1.49226e+06	0.37195	0.902104	0.465697
ALDH8A1	6	134417393	135450115	796.597	0.936472	927.158	0.925989	16.2834	0.72682	3.63877e-21	0.96647	1.69879e+06	0.0645966	1.29177	0.592232
ALDH9A1	1	165162216	166198562	5807.84	0.258702	5730.5	0.28314	42.6318	0.122353	2.62973e-20	0.284909	683493	0.627069	1.50122	0.656622
ALDOA	16	29564164	30570457	6891.84	0.00706284	6771.18	0.00821049	7.85456	0.480439	1.44871e-20	0.297268	518483	0.174103	2.03408	0.813022
ALDOB	9	100920560	101949664	930.516	0.97794	1005.1	0.972177	12.6931	0.708222	1.62573e-20	0.403744	386670	0.255963	4.81607	1.54982
ALDOC	17	28073115	29076948	3261.38	0.126079	3129.43	0.126907	4.60274	0.579621	7.46225e-21	0.619802	1.6653e+06	0.261948	0.0322703	0.0667985
ALG1	16	4533702	5587379	12288.5	0.11908	11634.6	0.160675	48.6282	0.532109	2.65305e-20	0.988084	704137	0.503282	0.415943	0.284859
ALG10	12	33522468	34529694	740.348	0.484019	693.577	0.505777	9.08953	0.236076	5.68775e-21	0.337652	1.07142e+06	0.527406	3.41441	1.18957
ALG10B	12	37816762	38829721	5245.65	0.145456	5292.28	0.14947	7.25363	0.0548053	5.7206e-21	0.0798307	1.84011e+06	0.0896799	0.0875191	0.115004
ALG11	13	51512391	52579232	1225.36	0.956602	1261.57	0.960209	6.48167	0.868613	5.97682e-21	0.773538	1.89315e+06	0.00179745	0.085816	0.113755
ALG12	22	49400229	50418438	8686.85	0.0321802	8797.79	0.0307355	34.6118	0.269995	2.60051e-20	0.191226	2.42846e+06	0.00750737	0.0942191	0.119827
ALG14	1	94474405	95572951	5437.76	0.799307	5595.47	0.796631	21.7156	0.776877	2.19475e-20	0.813432	1.20142e+06	0.215868	2.61954	0.976522
ALG1L2	3	129581831	130613227	16114	0.000948695	16660.3	0.000775909	36.1447	0.0521405	2.26174e-20	0.144488	1.50863e+06	0.0606305	2.76449	1.01603
ALG2	9	98716425	99721942	3025.21	0.444279	3238.09	0.381233	11.8609	0.286664	6.3308e-21	0.717044	1.32274e+06	0.131203	1.49757	0.655517
ALG3	3	183742301	184749548	3981.91	0.302771	3923.01	0.29547	16.9017	0.303493	1.7514e-20	0.432919	923179	0.756877	0.734492	0.407345
ALG5	13	36449738	37500763	4725.84	0.715097	4819.78	0.729683	26.8268	0.306435	1.55002e-20	0.787726	1.08399e+06	0.464509	0.989054	0.494886
ALG6	1	62867575	63938553	7958.24	0.0806813	7948.71	0.0805807	15.5734	0.731391	1.88832e-20	0.563133	146950	0.315702	1.44405	0.639245
ALG8	11	77595244	78639660	600.426	0.763301	648.061	0.779514	13.4856	0.465666	7.7982e-21	0.528381	1.35912e+06	0.348728	0.36619	0.263533
ALG9	11	111282195	112371581	21231.2	1.38402e-06	21829.1	7.1781e-07	14.8574	0.196827	7.58707e-21	0.850546	1.53048e+06	0.235398	5.30742	1.67295
ALK	2	28692774	30421586	7157.17	0.818431	6961.68	0.85122	47.5413	0.426807	4.09275e-20	0.369263	1.23868e+06	0.607816	0.119965	0.137229
ALKAL1	8	52034037	53065430	10617.6	0.000723364	10131.5	0.000881332	22.8502	0.023116	1.38978e-20	0.425479	723640	0.611055	0.119737	0.137082
ALKAL2	2	1	788851	2993.15	0.556668	3294.53	0.481099	22.8992	0.0592096	2.19632e-20	0.3492	3.94572e+06	0.0101083	0.0106077	0.0371725
ALKBH1	14	77172404	78208023	4110.08	0.747111	4004.84	0.754583	36.644	0.295851	2.38728e-20	0.506459	1.47213e+06	0.108853	0.91926	0.471508
ALKBH2	12	108588188	109593631	833.538	0.876669	806.959	0.882596	1.02448	0.957214	5.60145e-21	0.826389	1.79379e+06	0.00172702	0.359596	0.260641
ALKBH3	11	43380811	44420274	4379.06	0.635933	4591.24	0.620332	11.4202	0.865242	1.77367e-20	0.586331	1.03609e+06	0.837427	0.667679	0.383144
ALKBH4	7	101956238	102964863	6231.7	0.0228759	6216.8	0.0260229	14.8746	0.411835	1.13272e-20	0.379195	724888	0.260396	1.11317	0.535519
ALKBH5	17	17683078	18709954	1715.63	0.46587	1721.03	0.48088	11.8349	0.187929	1.60963e-20	0.08431	1.492e+06	0.425529	0.0509673	0.0854513
ALKBH6	19	35509120	36514239	10684.8	0.000727512	11163.3	0.000614412	23.6621	0.242525	9.31702e-21	0.651364	519900	0.664495	0.345749	0.254512
ALKBH7	19	5872794	6875250	6648.97	0.457436	6674.26	0.444394	16.37	0.434916	1.73429e-20	0.927556	1.31773e+06	0.0668812	0.0834095	0.111973
ALKBH8	11	107002727	108065742	3308.25	0.424804	3380.9	0.425133	12.9097	0.639711	1.98743e-20	0.40241	1.7397e+06	0.0400151	0.0651484	0.0977053
ALLC	2	3158200	4202671	6858.01	0.475558	7071.09	0.462613	47.7099	0.211452	2.1663e-20	0.532212	1.52577e+06	0.389787	0.0780898	0.107959
ALMS1	2	72885758	74125166	4294.19	0.161769	4349.95	0.168047	3.51997	0.611331	4.16486e-21	0.957257	1.10928e+06	0.341352	0.695244	0.393204
ALOX12	17	6496049	7510754	4753.75	0.466933	4669.86	0.456748	22.027	0.297184	1.2174e-20	0.84833	1.67099e+06	0.866056	0.1208	0.137768
ALOX12B	17	7572636	8587716	12910.8	0.000352393	12659.8	0.000371729	34.5181	0.0971741	2.5587e-20	0.0996318	2.37442e+06	0.0227072	0.227651	0.19841
ALOX15	17	4130919	5142294	15378.9	0.00484277	15416.2	0.00525967	22.1825	0.879614	3.68457e-20	0.348782	1.22334e+06	0.540643	1.02692	0.507401
ALOX15B	17	7539034	8549134	7545.83	0.0612874	7505.52	0.0651792	31.2037	0.140041	2.31391e-20	0.126969	1.44378e+06	0.144444	4.49927	1.46968
ALOX5	10	44874176	45946119	968.513	0.690227	1048.28	0.675573	5.4624	0.80055	5.66415e-21	0.742132	1.69812e+06	0.120537	0.741731	0.409931
ALOX5AP	13	30213478	31264426	17098.7	0.00344309	16806.7	0.00461767	56.8148	0.0777557	5.87792e-20	0.0722583	1.53539e+06	0.134418	0.930062	0.475154
ALOXE3	17	7595900	8619047	12930.1	0.000782719	12680.8	0.000867555	34.5066	0.0975994	2.55057e-20	0.0991059	1.20196e+06	0.377028	0.0157593	0.0457096
ALPG	2	231906844	232910714	4365.29	0.0566086	4709.87	0.0531999	22.531	0.325028	2.01978e-20	0.308866	1.29206e+06	0.0837469	0.212469	0.190549
ALPI	2	231956125	232960753	3837.17	0.0611641	4137.34	0.0568557	21.1442	0.354491	1.92063e-20	0.373795	1.40803e+06	0.180436	0.0105537	0.0370739
ALPK1	4	111785509	112942621	4059.63	0.159028	4102.04	0.15726	9.81574	0.255971	7.46228e-21	0.531825	334906	0.165781	4.26194	1.40921
ALPK2	18	57981247	59129091	3722.46	0.935169	3904.09	0.927521	12.3791	0.978604	2.03001e-20	0.633126	332064	0.167373	1.57394	0.678535
ALPK3	15	84317356	85373479	2172.29	0.193367	2087.18	0.238491	60.7191	0.0242187	2.11449e-20	0.163562	1.1965e+06	0.25437	0.171737	0.168404
ALPL	1	21009397	22078410	17660	0.00124807	17961	0.00127314	68.1694	0.0496054	3.53111e-20	0.214692	1.46456e+06	0.167107	0.143767	0.152079
ALPP	2	231878724	232882889	4360.39	0.0577772	4698.32	0.0538984	21.3792	0.310121	1.95288e-20	0.333964	1.83611e+06	0.013628	0.33934	0.251649
ALS2	2	201200267	202282112	8458.68	0.158153	8745.32	0.178317	60.1531	0.169757	3.21131e-20	0.0957824	1.44801e+06	0.753698	0.930062	0.475154
ALS2CL	3	46168995	47193704	2358.31	0.623178	2371.99	0.651232	3.03341	0.956556	6.83112e-21	0.850737	335631	0.168146	1.68512	0.71165
ALX1	12	84780220	85801784	2730.62	0.183366	2711.36	0.208431	7.09153	0.446894	3.12796e-21	0.773156	145916	0.66976	0.105316	0.127528
ALX3	1	109559870	110570672	4183.6	0.183253	3925.11	0.218688	20.3942	0.218492	1.95811e-20	0.286914	922295	0.18871	1.03588	0.510348
ALX4	11	43760440	44810139	10234.3	0.170126	10102.8	0.206505	43.9105	0.436835	3.49957e-20	0.409656	1.64602e+06	0.0319493	1.03588	0.510348
ALYREF	17	81387835	82391586	8392.98	0.035641	7893.58	0.0523269	46.5755	0.0631019	3.3561e-20	0.0148237	915467	0.014588	0.00230785	0.0169675
AMACR	5	33486165	34508104	19486.7	0.000326474	19743.2	0.000300618	27.9875	0.0551696	2.34662e-20	0.011509	1.24337e+06	0.635762	0.00714384	0.030285
AMBN	4	70092256	71107288	2134.3	0.873903	2064.57	0.880413	2.77593	0.994751	8.55935e-21	0.956854	1.28606e+06	0.280162	0.0110356	0.0379454
AMBP	9	113560127	114578328	8779.73	0.177871	8659.33	0.190241	34.5524	0.138555	5.12467e-20	0.03838	1.8989e+06	0.00194267	0.0484256	0.0831116
AMBRA1	11	45896414	47094125	11042.4	4.80687e-05	11373.3	4.06554e-05	23.1193	0.162	8.51931e-21	0.203398	1.65582e+06	0.34287	3.57683	1.23217
AMD1	6	110374770	111398879	4661.7	0.132957	4677.55	0.150639	10.4712	0.375316	2.15781e-20	0.189451	860154	0.33146	0.00223903	0.0167078
AMDHD1	12	95443331	96468720	3683.55	0.261058	3514.5	0.322083	31.787	0.601367	3.16578e-20	0.0756044	1.28804e+06	0.165705	0.782996	0.424551
AMDHD2	16	2020357	3031422	13488.9	7.27437e-05	13222.5	7.39265e-05	31.4305	0.0586121	5.72453e-20	1.69591e-07	1.54644e+06	0.0889559	0.045486	0.08034
AMER2	13	24661679	25672288	17933.3	0.000878704	17402.7	0.00129455	35.5335	0.305072	2.87263e-20	0.366351	946564	0.561438	1.68011	0.710165
AMER3	2	130255540	131268134	3692.68	0.606492	3840.37	0.588208	11.0503	0.214704	4.35251e-20	3.70272e-05	1.61269e+06	0.0525777	4.08447	1.36372
AMFR	16	55861452	56925545	8799.81	0.0204016	8917.47	0.02195	9.07109	0.702813	3.58269e-20	0.0258012	1.02006e+06	0.570379	0.82254	0.438376
AMH	19	1749309	2752073	5798.11	0.549785	5817.85	0.550143	32.3189	0.385026	3.38404e-20	0.277963	1.16397e+06	0.117887	0.289809	0.228895
AMHR2	12	52923855	53931672	6147.23	0.0831841	6373.72	0.0716537	22.2742	0.0430887	1.57663e-20	0.0930258	1.32351e+06	0.208048	0.146751	0.153873
AMIGO1	1	109004178	110009738	6936.9	0.141009	6976.81	0.136259	20.9446	0.372709	1.84444e-20	0.40173	2.10281e+06	0.00798116	0.360457	0.26102
AMIGO2	12	46575707	47579959	3274.49	0.626145	3331.08	0.636618	13.1543	0.727276	1.3036e-20	0.791778	1.49328e+06	0.0243538	0.00121424	0.0122432
AMIGO3	3	49216829	50219684	4219.36	0.0191328	4540.12	0.0166121	10.7488	0.0431824	1.02936e-20	0.144748	609163	0.232194	0.350304	0.256536
AMMECR1L	2	127361630	128385967	6576.43	0.102241	6600.28	0.0962791	13.3151	0.15285	1.90411e-20	0.122839	1.03225e+06	0.109015	1.98541	0.799089
AMN	14	102422663	103433596	4760.27	0.137304	4572.99	0.168505	39.5106	0.149546	2.26904e-20	0.292176	1.37219e+06	0.227932	2.82944	1.03362
AMN1	12	31171142	32229121	4672.4	0.895948	4768.27	0.874312	31.8848	0.583781	2.43443e-20	0.565131	1.32292e+06	0.10082	0.760046	0.416445
AMOTL1	11	94206431	95376748	5654.28	0.264215	5688.82	0.260488	33.0787	0.190748	2.19251e-20	0.441517	804439	0.427616	2.57669	0.964777
AMOTL2	3	133855347	134875479	5288.43	0.183389	5187.42	0.193862	18.9217	0.648027	2.03474e-20	0.529132	1.12318e+06	0.327325	0.0801765	0.109546
AMPD1	1	114173090	115195618	1684.44	0.931824	1673.89	0.921219	10.295	0.818084	1.54803e-20	0.501661	1.49469e+06	0.0956927	0.0642563	0.0969692
AMPD2	1	109116104	110132051	5291.98	0.212061	5302.88	0.20392	28.9601	0.223221	1.8398e-20	0.396728	859391	0.00695556	0.0669737	0.0991987
AMPD3	11	9808313	11007579	2826.54	0.943136	2695.11	0.950053	11.3145	0.963518	8.83066e-21	0.992275	1.41198e+06	0.0166696	0.963801	0.486475
AMPH	7	37883704	39131420	2625.72	0.947629	2765.61	0.944472	18.6934	0.946138	2.51418e-20	0.740575	682059	0.077886	0.761861	0.417089
AMT	3	48916778	49922685	3561.41	0.0182275	3902.41	0.0162375	10.2867	0.0159016	5.82746e-21	0.298713	2.3127e+06	0.0219603	0.915035	0.47008
AMTN	4	70018569	71032743	2250.23	0.821418	2189.88	0.825005	2.99049	0.99387	7.99619e-21	0.977492	2.36509e+06	0.0875604	0.199955	0.18392
AMY1A	1	103155760	104164554	2593.18	0.235821	2714.17	0.23695	2.91944	0.658134	4.61152e-21	0.49686	1.26625e+06	0.263858	0.0292122	0.0633405
AMY1B	1	103187415	104196454	2593.18	0.235821	2714.17	0.23695	2.91944	0.658134	4.61152e-21	0.49686	1.93794e+06	0.255824	0.152384	0.157224
AMY1C	1	103245323	104258726	3153.69	0.178703	3215.59	0.18573	4.56511	0.512384	6.12147e-21	0.382851	1.4071e+06	0.0569404	2.31069	0.891142
AMY2A	1	103117427	104125780	2593.18	0.235821	2714.17	0.23695	2.91944	0.658134	4.61152e-21	0.49686	1.40835e+06	0.0521252	0.802911	0.431535
AMY2B	1	103053815	104079534	2630.15	0.281355	2748.07	0.280444	3.0358	0.685222	4.85679e-21	0.600305	1.32168e+06	0.0438845	0.0978717	0.122399
AMZ1	7	2179522	3275500	6454.14	0.245981	6349.7	0.258779	28.7015	0.314249	2.61986e-20	0.816617	1.39692e+06	0.0562121	0.0199574	0.0517552
AMZ2	17	67705481	68757712	6786.8	0.00400249	7370.53	0.00313021	22.4011	0.0748046	3.58193e-20	0.0374016	1.42806e+06	0.0628399	0.562507	0.34366
ANAPC1	2	111111639	112384690	7293.99	0.204704	7227.93	0.194805	30.6136	0.546031	2.96344e-20	0.201394	2.00864e+06	0.130597	0.00463744	0.0242434
ANAPC10	4	144331908	145598541	1604.93	0.498265	1666.04	0.512624	4.78813	0.936246	6.60147e-21	0.807642	1.39633e+06	0.266763	0.000845424	0.0101926
ANAPC11	17	81390790	82400991	8150.85	0.02855	7653.11	0.0431304	46.6401	0.064535	3.37061e-20	0.0178627	867495	0.71094	4.49927	1.46968
ANAPC13	3	133977706	134986716	3709.35	0.534668	3653.29	0.542769	8.54729	0.932088	1.21446e-20	0.909849	385001	0.515404	0.00526129	0.0258678
ANAPC15	11	71606378	72612780	8391.62	0.113334	7966.6	0.143479	20.5925	0.0710174	1.29358e-20	0.177705	1.29626e+06	0.303673	2.80312	1.0265
ANAPC16	10	71716000	72735860	2364.92	0.184255	2426.43	0.188068	1.78193	0.729169	1.54843e-20	0.106111	216957	0.924842	0.00404385	0.0225985
ANAPC2	9	136674784	137688560	6939.25	0.332996	7309.99	0.275337	15.2875	0.803802	1.64643e-20	0.673128	1.78449e+06	0.0325631	0.00204939	0.0159717
ANAPC4	4	24877263	25918498	3907.31	0.880029	4150.11	0.854047	30.4877	0.692612	2.69444e-20	0.723923	1.90752e+06	0.0177385	0.123151	0.139278
ANAPC5	12	120808245	121899896	7494.43	0.290741	7728.2	0.273874	19.6051	0.131883	1.68444e-20	0.467891	355287	0.656257	1.00479	0.5001
ANAPC7	12	109872900	110903730	457.742	0.780699	442.083	0.767661	1.00629	0.760812	3.43319e-21	0.408445	1.34257e+06	0.30309	0.787128	0.426004
ANG	14	20184177	21198971	15847.3	0.149013	16048.9	0.139801	112.608	0.00921543	1.0752e-19	0.000182114	1.38633e+06	0.139944	0.00623253	0.0282255
ANGEL1	14	76286009	77326246	15839.9	0.0143052	16185.5	0.0119024	54.3297	0.324557	4.42385e-20	0.341126	1.6095e+06	0.0012211	0.631628	0.369817
ANGEL2	1	212492182	213515867	3639.65	0.512789	3628.31	0.513556	31.2325	0.299738	2.07429e-20	0.274924	2.6244e+06	0.014435	0.279844	0.224169
ANGPT1	8	106749482	107998055	2166.05	0.819987	2294.5	0.77896	27.1082	0.255043	1.92755e-20	0.750875	1.70411e+06	0.00782209	0.153978	0.158164
ANGPT2	8	5999632	7063409	20376.5	0.0137987	20287.6	0.0157893	110.225	0.00494643	1.0053e-19	0.00425568	65315.1	0.787957	0.458644	0.302545
ANGPT4	20	369900	1416334	10436.6	0.505266	10240.2	0.535541	65.6236	0.199675	6.03363e-20	0.202668	960064	0.764103	0.60795	0.360951
ANGPTL1	1	178349535	179371077	3772.63	0.208189	3382.88	0.290312	35.5906	0.128261	8.05065e-21	0.857443	1.6967e+06	0.32947	1.89331	0.772552
ANGPTL2	9	126587348	127622635	2271.76	0.84508	2240.71	0.866493	13.9471	0.37493	1.15695e-20	0.681145	2.6857e+06	0.00137229	2.29556	0.886912
ANGPTL3	1	62097520	63106313	3411.97	0.68297	3326.95	0.687834	19.2018	0.683941	1.19104e-20	0.91549	224181	0.22223	2.29556	0.886912
ANGPTL4	19	7863289	8874370	6881.9	0.626141	7169.66	0.580567	27.4314	0.460024	1.65997e-20	0.823537	432020	0.962329	2.18815	0.856748
ANGPTL5	11	101390674	102416522	1351.82	0.666864	1449.8	0.609619	10.1166	0.548636	1.07415e-20	0.487865	1.37368e+06	0.0298402	1.97037	0.794772
ANGPTL6	19	9592338	10602678	5268.87	0.218861	4807.62	0.295298	33.7658	0.0440129	1.3935e-20	0.476809	1.42152e+06	0.231284	0.912885	0.469352
ANGPTL7	1	10689355	11695981	3260.02	0.673566	3325.55	0.681204	19.8568	0.618068	1.33013e-20	0.763481	727362	0.328619	1.30528	0.596448
ANGPTL8	19	10737502	11741943	3211.68	0.543939	3164.1	0.580215	8.71696	0.737787	1.10119e-20	0.432378	2.82024e+06	0.0725944	0.130628	0.144008
ANHX	12	132718312	133735877	4036.54	0.166142	3921.41	0.171175	13.695	0.17407	1.06967e-20	0.240647	1.35366e+06	0.207459	0.0984042	0.122771
ANK1	8	41153220	42396741	2339.37	0.773064	2348.52	0.783643	17.225	0.388358	1.42685e-20	0.808217	1.34506e+06	0.198107	0.00623253	0.0282255
ANK2	4	112318032	113884221	4925.71	0.431589	4937.89	0.431722	15.7948	0.308904	1.99206e-20	0.495693	752957	0.235571	0.496971	0.318005
ANK3	10	59526298	61233490	6619.34	0.406389	6903.42	0.375266	56.5741	0.0419981	2.20183e-20	0.318862	1.86635e+06	0.144941	0.0984042	0.122771
ANKAR	2	189174290	190261193	3985.85	0.514558	4103.82	0.487923	11.2424	0.739554	9.07708e-21	0.679401	1.405e+06	0.386323	0.205649	0.186953
ANKDD1A	15	64411902	65458691	5744.44	0.084867	5767.97	0.0843872	13.5141	0.267175	1.24006e-20	0.170538	3.21398e+06	0.0726419	0.0479532	0.082671
ANKDD1B	5	75111182	76181773	2181.06	0.12946	2170.52	0.125055	2.02788	0.878602	8.69465e-21	0.332321	196414	0.952468	7.06988	2.10574
ANKEF1	20	9486126	10558303	5710.2	0.436176	5697.54	0.482646	70.1236	0.022601	3.4895e-20	0.232311	2.27866e+06	0.0500395	4.92015	1.57601
ANKFN1	17	55382301	57017016	4482.59	0.610198	4557.46	0.610426	26.3162	0.330683	2.57692e-20	0.598268	1.39272e+06	0.110982	4.46464	1.46088
ANKFY1	17	3663821	4763995	15248.3	0.00592721	15194.9	0.00769063	27.2722	0.7379	4.27906e-20	0.199874	2.95681e+06	0.0856954	4.47541	1.46362
ANKH	5	14204800	15371778	1813.41	0.930718	2026.27	0.909626	25.3063	0.305168	2.16814e-20	0.0395572	1.94616e+06	0.367041	2.24071	0.871538
ANKHD1	5	139901814	141039856	2024.34	0.62906	2083.92	0.61269	6.376	0.539817	3.89388e-21	0.825565	1.94415e+06	0.391684	3.76213	1.28046
ANKHD1-EIF4EBP3	5	139901908	141049569	2024.34	0.62906	2083.92	0.61269	6.376	0.539817	3.89388e-21	0.825565	1.07639e+06	0.68139	0.0334624	0.0681075
ANKIB1	7	91745974	92901383	1140.64	0.755942	1064.35	0.800142	3.83252	0.208084	5.32912e-21	0.385949	443774	0.364808	0.290244	0.229101
ANKK1	11	112887779	113900416	3342.64	0.445019	3336.17	0.463237	9.01835	0.900933	1.17152e-20	0.743417	477887	0.374924	0.0081164	0.0323515
ANKLE1	19	16781645	17787646	11049.5	0.00723369	10748.8	0.00616555	59.4937	0.0374863	4.06146e-20	0.0442308	565419	0.747911	0.141959	0.150986
ANKLE2	12	132225503	133261832	7312.7	0.282874	7058.38	0.301988	29.4388	0.198792	2.61948e-20	0.36753	517212	0.853833	0.31184	0.239161
ANKMY1	2	239979422	241069209	2516.87	0.972952	2514.31	0.973611	17.9609	0.865	1.90171e-20	0.967354	1.8383e+06	0.0365206	3.26858	1.15108
ANKMY2	7	16099779	17145817	3756.67	0.957613	3972.27	0.951904	32.3965	0.676497	4.12084e-20	0.155503	892801	0.209328	0.776724	0.422342
ANKRA2	5	73052190	74065667	7828.44	0.0229766	8234.83	0.0182989	123.733	0.001547	3.72573e-20	0.029946	56982.1	0.660208	0.00627101	0.0283152
ANKRD1	10	90412096	91421087	4866.35	0.120428	5023.06	0.118556	7.63969	0.767078	1.23075e-20	0.394073	2.18096e+06	0.0158951	0.0459203	0.0807541
ANKRD10	13	110378540	111415069	9931.88	0.342447	10026.7	0.385142	43.9622	0.636961	5.46721e-20	0.44791	2.07065e+06	0.0122243	1.96643	0.79364
ANKRD11	16	88767630	89990561	6893.83	0.582941	6863.8	0.593577	24.3648	0.297588	5.49712e-20	0.0119581	535777	0.65765	3.01258	1.08291
ANKRD12	18	8636228	9785985	9664.29	0.259253	10089.6	0.247498	51.3552	0.391797	3.55218e-20	0.786221	1.55133e+06	0.0915719	1.96643	0.79364
ANKRD13A	12	109499186	110539763	1142.31	0.535601	1198.21	0.505567	6.43698	0.762535	5.702e-21	0.720108	1.49453e+06	0.117179	1.96643	0.79364
ANKRD13B	17	29089769	30114761	629.844	0.248675	620.68	0.232345	1.31233	0.314187	2.44475e-21	0.329596	2.20489e+06	0.200416	1.53328	0.66631
ANKRD13C	1	69758999	70854734	6601.88	0.0230652	6510.37	0.0222926	8.03813	0.468696	1.17974e-20	0.613439	914038	0.0121987	0.0625307	0.0955334
ANKRD13D	11	66789300	67802485	8902.99	0.0311924	8970.35	0.0295433	8.14896	0.652743	9.82976e-21	0.474894	3.18749e+06	0.00172744	1.49242	0.653959
ANKRD16	10	5361616	6389906	20721.1	0.016406	21202.1	0.0140238	72.8585	0.185213	6.50767e-20	0.190384	1.99866e+06	0.15497	2.46344	0.933588
ANKRD17	4	72573376	73758798	4063.85	0.0464307	4079.93	0.0487014	6.90332	0.475255	9.69822e-21	0.383205	2.0008e+06	0.0612735	0.109029	0.130034
ANKRD18A	9	38040567	39120596	6567.47	0.232787	6315.88	0.283166	23.6702	0.680032	3.47508e-20	0.421891	1.6555e+06	0.225675	3.51403	1.21573
ANKRD18B	9	33024251	34108848	4229.83	0.651985	4525.68	0.618054	37.2183	0.119545	2.23763e-20	0.446388	2.29212e+06	0.0357165	0.384025	0.271275
ANKRD2	10	97072499	98083884	4281.13	0.334027	4101.02	0.322016	8.63363	0.764637	9.54209e-21	0.916744	2.25094e+06	0.0776412	0.00521905	0.0257608
ANKRD20A1	9	67332765	68420552	6796.2	0.000343452	6719.83	0.000293228	11.1278	0.0800993	1.76929e-20	0.0136361	1.32807e+06	0.209342	0.0788427	0.108534
ANKRD22	10	88319896	89351844	3203.57	0.575631	3220.06	0.583316	19.1748	0.5845	1.25053e-20	0.773548	711706	0.0886637	1.0505	0.515142
ANKRD23	2	96324526	97357934	1450.56	0.11634	1309.96	0.132307	4.35584	0.311608	5.91826e-21	0.459273	1.59765e+06	0.115612	1.10954	0.534348
ANKRD24	19	3682689	4724814	6929.5	0.644862	6769.49	0.682354	29.9467	0.712411	2.26063e-20	0.624688	1.33536e+06	0.26801	0.106299	0.128195
ANKRD26	10	26473793	27600494	6742.9	0.318465	6527.76	0.362383	16.9539	0.867097	1.72961e-20	0.810781	908643	0.120899	2.16466	0.850116
ANKRD27	19	32097006	33176597	2146.36	0.7939	2114.66	0.805347	14.199	0.60563	1.65618e-20	0.355102	1.87391e+06	0.370338	3.37066	1.17805
ANKRD28	3	15167236	16359771	4099.79	0.186073	4635.08	0.129835	47.9244	0.00256785	3.52104e-20	0.0389757	1.47938e+06	0.856801	1.96212	0.792401
ANKRD29	18	23098926	24162911	9209.55	0.00109608	9460.97	0.00109601	32.508	0.0656372	4.71611e-20	0.00224836	1.35378e+06	0.335994	0.0606439	0.0939446
ANKRD30A	10	36625598	37732567	3923.1	0.173941	3868.85	0.198776	26.6694	0.171496	1.37867e-20	0.222913	1.97933e+06	0.0309115	0.431142	0.291215
ANKRD30B	18	14228272	15354667	11453.4	0.0477555	11605.1	0.0457305	60.1562	0.0121566	5.2733e-20	0.00378115	1.82949e+06	0.221635	0.270249	0.219564
ANKRD30BL	2	131647591	132757969	5553.52	0.184527	5760.85	0.164329	19.125	0.54604	2.38544e-20	0.224025	1.69067e+06	0.136027	4.19334	1.39165
ANKRD31	5	74568275	75736911	4227.06	0.146418	4199.39	0.153042	8.53308	0.0938845	1.47724e-20	0.0869185	1.0206e+06	0.698355	0.266434	0.217718
ANKRD33	12	51388009	52391727	2138	0.814559	2098.18	0.842841	8.51903	0.955288	2.02394e-20	0.391713	816290	0.175554	0.00431739	0.0233698
ANKRD33B	5	10064070	11157816	7846.48	0.214487	7761.29	0.243147	41.8639	0.088296	4.23619e-20	0.084198	1.36996e+06	0.191551	0.183619	0.175041
ANKRD34A	1	145459441	146464575	10276.4	0.0027201	9559.43	0.00483272	97.2737	6.31053e-07	3.08823e-20	4.21171e-06	786686	0.843941	1.29408	0.592953
ANKRD34B	5	80056755	81070280	4039.22	0.435624	4399.98	0.36482	49.4881	0.0949821	2.30113e-20	0.454957	2.17277e+06	0.0195292	0.0412088	0.076168
ANKRD34C	15	78782722	79798239	14531.6	0.000282406	13876.2	0.000473974	41.4213	0.0140944	4.35594e-20	0.00140072	311579	0.0561283	0.0131198	0.0415277
ANKRD35	1	145366560	146385866	7772.87	0.00449455	7091.51	0.00828234	94.3542	5.34289e-07	2.92386e-20	4.71622e-06	798893	0.837759	0.0073799	0.0307981
ANKRD36	2	96613153	97764521	1440.92	0.118799	1301.89	0.137247	4.56241	0.449834	4.9394e-21	0.545198	1.80746e+06	0.118932	0.0208568	0.0529734
ANKRD36B	2	96992663	98089877	1338.34	0.111787	1222.22	0.128446	3.79786	0.432806	2.79945e-21	0.498809	316871	0.0699821	6.04386	1.85528
ANKRD36C	2	95336919	96491831	559.463	0.442747	650.092	0.424442	4.02637	0.264703	1.81903e-21	0.681783	732807	0.221615	0.0466662	0.0814616
ANKRD37	4	184896021	185900628	6370.02	0.77958	6560.78	0.764934	36.5919	0.573819	3.00855e-20	0.813886	747958	0.101076	0.888003	0.4609
ANKRD39	2	96336611	97358016	1450.56	0.11634	1309.96	0.132307	4.35584	0.311608	5.91826e-21	0.459273	1.03081e+06	0.591719	2.55674	0.959301
ANKRD40	17	50193198	51207914	20280.2	2.58759e-05	20414.7	2.76108e-05	21.8758	0.648094	2.63597e-20	0.486678	285944	0.0947754	1.67648	0.70909
ANKRD40CL	17	50261029	51267557	19662.7	1.31241e-05	19776.1	1.33299e-05	20.8383	0.404966	1.98826e-20	0.46207	900354	0.119924	2.4598	0.93258
ANKRD42	11	82693712	83760694	2451.63	0.199108	2391.81	0.18655	5.26703	0.726781	3.81963e-21	0.96159	2.05694e+06	0.0111116	0.900545	0.465168
ANKRD44	2	196467017	197811173	5804.1	0.0464904	5524.67	0.0593467	35.5597	0.0100065	1.60655e-20	0.204957	2.07057e+06	0.0115919	0.458798	0.302608
ANKRD45	1	173108336	174169851	3013.3	0.442634	3040.29	0.450621	10.4701	0.288985	2.45126e-20	0.0046503	1.12909e+06	0.138077	0.575132	0.348502
ANKRD46	8	100009752	101059784	1959.91	0.397775	1975.84	0.388453	21.3133	0.105612	2.25322e-20	0.0485634	347909	0.158797	0.586516	0.352842
ANKRD49	11	93993979	94999578	4177.3	0.108848	4161.66	0.113444	7.3627	0.490334	8.68651e-21	0.339655	263623	0.164844	0.177943	0.17189
ANKRD50	4	124164048	125212732	3784.93	0.345992	3768.81	0.334644	50.1809	0.0700569	1.5606e-20	0.227163	1.04227e+06	0.00802266	0.00106047	0.0114314
ANKRD52	12	55737807	56758384	11688.9	0.00177816	12149.2	0.00181594	25.7818	0.0771034	4.23819e-21	0.908112	1.20147e+06	0.09619	3.56573	1.22927
ANKRD53	2	70478380	71485499	10181.4	0.0116209	10285.9	0.012614	19.4662	0.6148	1.67875e-20	0.564524	1.54966e+06	0.00383516	0.0740245	0.104818
ANKRD54	22	37330855	38349327	2835.9	0.30061	2951.09	0.312313	11.0911	0.697779	9.74731e-21	0.91296	1.46262e+06	0.204616	2.38646	0.912252
ANKRD55	5	55599680	56733330	3436.61	0.594076	3546.18	0.61223	58.0784	0.189151	2.87397e-20	0.111328	2.06657e+06	0.0814193	0.890263	0.46167
ANKRD6	6	88933152	90133834	9297.34	0.03765	9377.9	0.0367409	25.5868	0.19102	2.11503e-20	0.518688	2.10453e+06	0.00172942	0.0349526	0.0697159
ANKRD60	20	57716126	58728653	3064.59	0.943364	3267.62	0.931917	35.9362	0.203599	2.00125e-20	0.471987	1.57519e+06	0.285531	0.21293	0.19079
ANKRD61	7	5531376	6536552	19779.7	5.44615e-05	19668.8	5.84516e-05	30.4005	0.173567	2.81214e-20	0.0662084	1.5513e+06	0.0919826	0.238445	0.20389
ANKRD62	18	11593843	12629764	13674.1	0.00667108	13345.9	0.00891258	33.5445	0.217953	2.88337e-20	0.336146	1.45139e+06	0.0409031	5.30179	1.67155
ANKRD63	15	39778372	40783064	4511.36	0.471625	4306.46	0.516376	25.7225	0.255245	1.61976e-20	0.404113	1.63229e+06	0.287469	4.43488	1.45331
ANKRD65	1	918420	1921769	14896.9	0.0225128	15156.4	0.0220464	26.4871	0.263903	2.08505e-20	0.609824	1.39835e+06	0.161303	0.339935	0.251915
ANKRD66	6	46246933	47259506	4250.12	0.509676	4394.7	0.511037	17.0061	0.541693	1.30158e-20	0.628607	1.17102e+06	0.632081	3.79756	1.28965
ANKRD7	7	117714669	118996171	2949.47	0.543747	3097	0.55006	15.2059	0.691279	3.12922e-21	0.95834	1.89786e+06	0.0217243	0.368778	0.264664
ANKRD9	14	102001767	103009799	2113.34	0.590829	2139.95	0.587506	11.8536	0.12571	2.19897e-20	0.0123842	911590	0.14835	0.406039	0.28068
ANKS1A	6	34389255	35591406	5048.73	0.0276797	4972.86	0.0310559	18.4803	0.323272	1.58461e-20	0.389283	2.23531e+06	0.0738852	0.0159893	0.0460583
ANKS1B	12	98226457	100484936	7303.27	0.191888	7501.84	0.179948	25.4965	0.154692	3.0387e-20	0.209849	518787	0.612757	0.0122494	0.040066
ANKS3	16	4196510	5234378	11056.1	0.0648556	10481.9	0.0857683	44.2728	0.511875	1.81391e-20	0.990427	1.65228e+06	0.138532	0.20105	0.184505
ANKS4B	16	20733699	21753850	2902.74	0.240111	2867.79	0.235924	3.95102	0.720745	1.1782e-20	0.274331	2.70706e+06	0.0713067	0.101102	0.124643
ANKS6	9	98231329	99296965	4558.53	0.461199	4821.98	0.418237	18.7381	0.286888	1.07659e-20	0.886455	1.88449e+06	0.0447181	0.0412786	0.0762374
ANKUB1	3	149261100	150468385	4015.47	0.542959	4180.29	0.518282	19.204	0.787768	2.47125e-20	0.200609	1.53324e+06	0.393785	0.0128186	0.041027
ANKZF1	2	218729783	219736679	3986.6	0.315946	4320.58	0.24078	35.6361	0.0174031	1.32758e-20	0.224179	1.51424e+06	0.307796	2.97877	1.07384
ANLN	7	35889821	36953791	11391	0.271702	11580.5	0.264921	67.5333	0.0710237	3.40227e-20	0.29003	731294	0.0484186	0.360536	0.261054
ANO1	11	69485907	70689530	8409.5	0.340659	8313.06	0.389695	44.4605	0.416862	5.86935e-20	0.090199	257439	0.0241295	6.22402	1.89953
ANO10	3	42854859	44191594	4807.97	0.83412	4826.18	0.855329	7.8788	0.995449	1.39453e-20	0.934102	2.03228e+06	0.076248	7.0013	2.08911
ANO2	12	5031869	6446232	6586.32	0.826089	6737.41	0.807822	47.5111	0.486727	4.63617e-20	0.382124	1.86365e+06	0.210696	0.919942	0.471739
ANO3	11	25688842	27163289	14327	0.148704	15004.8	0.131909	47.831	0.286576	3.25945e-20	0.1939	2.22254e+06	0.277668	4.37289	1.43753
ANO4	12	100217526	101628641	3157.67	0.66996	3335.2	0.649342	21.1351	0.263269	1.51006e-20	0.792231	2.32771e+06	0.307047	0.327458	0.246295
ANO5	11	21282659	22783567	6347.2	0.395985	6397.53	0.389844	14.0358	0.859784	2.36043e-20	0.576456	2.68043e+06	0.176053	2.09998	0.831793
ANO6	12	44715987	45982280	4836.53	0.368687	4633.06	0.403792	13.1208	0.262452	8.76904e-21	0.575749	1.31317e+06	0.00905699	0.0807815	0.110003
ANO7	2	240688509	241725976	1506.67	0.77468	1478.7	0.789021	6.4067	0.958687	9.76244e-21	0.9354	2.67102e+06	0.110292	0.501012	0.319614
ANO8	19	16823223	17834855	11108.8	0.0122352	10815.4	0.0105895	59.7913	0.0381088	4.09783e-20	0.0466905	1.41531e+06	0.416145	0.10888	0.129934
ANO9	11	1	942011	11670.2	0.0160834	12446.4	0.00956719	57.8724	0.00485176	4.22213e-20	0.00351473	55309.5	0.731666	0.0607449	0.0940302
ANP32A	15	68278535	69320897	10139.4	0.0777988	10214.8	0.0783222	34.1175	0.0796317	2.23705e-20	0.172488	1.81134e+06	0.040139	0.684615	0.389338
ANP32B	9	97483341	98515943	2572.49	0.563153	2575.69	0.579957	12.8746	0.480743	1.39675e-20	0.472532	2.01535e+06	0.00157045	0.116735	0.135131
ANP32D	12	47972559	48973622	1286.52	0.352647	1336.25	0.341442	11.2217	0.84613	1.44632e-20	0.220543	3.30234e+06	0.000180664	0.138171	0.148677
ANP32E	1	149718417	150736156	2130.52	0.714981	2112.46	0.728214	6.73558	0.766107	3.23499e-21	0.707627	708479	0.49708	1.43383	0.636123
ANPEP	15	89284895	90315401	6417.87	0.0503413	6509.55	0.047514	15.0926	0.29026	2.39681e-20	0.148923	1.50817e+06	0.117817	2.26359	0.87796
ANTKMT	16	220581	1222590	4089.01	0.953173	4031.62	0.956799	12.6961	0.797651	1.61965e-20	0.349593	1.35485e+06	0.0131566	0.0546019	0.0887141
ANTXR1	2	68513176	69749327	2161.43	0.428003	2128.54	0.464542	5.09362	0.793082	1.06395e-20	0.496614	923986	0.092407	0.00677664	0.0294709
ANTXR2	4	79401146	80625454	2324.38	0.477817	2371.54	0.478776	13.9814	0.233517	2.0878e-20	0.200203	2.46712e+06	0.00121369	0.611779	0.362392
ANTXRL	10	45786345	46830207	3602.93	0.0186963	3666.73	0.0223813	8.09491	0.057734	1.26153e-20	0.0360597	4.10559e+06	0.00029579	0.716597	0.400923
ANXA1	9	72651865	73670393	5580.13	0.043253	5432.33	0.0586221	33.7722	0.0502138	3.18455e-20	0.017527	1.32471e+06	0.795659	4.7083	1.52263
ANXA10	4	167592537	168687736	9882.34	0.00288984	9904.95	0.00290222	16.5387	0.50444	2.53543e-20	0.10658	1.0338e+06	0.129149	0.732752	0.406722
ANXA11	10	79650889	80705572	3998.97	0.41301	3902.83	0.442268	7.46199	0.747401	1.38756e-20	0.550109	1.8057e+06	0.0458805	0.00174132	0.0147017
ANXA13	8	123180794	124237402	7841.93	0.116247	7970.36	0.114266	24.7497	0.645471	1.79802e-20	0.580651	277515	0.407424	2.94299	1.06424
ANXA2	15	59847134	60902883	9756.51	0.231351	9827.82	0.224445	34.5745	0.376135	3.46745e-20	0.105349	1.1553e+06	0.836704	0.0558855	0.0898446
ANXA2R	5	42539233	43543170	4095.15	0.00755304	4098.83	0.00628732	13.0847	0.345284	1.75901e-20	0.0188295	969854	0.0108397	0.0267456	0.0604345
ANXA3	4	78051747	79110451	4149	0.335616	4396.69	0.320629	21.0853	0.0120193	1.76132e-20	0.226636	1.46963e+06	0.263284	1.1344	0.542363
ANXA4	2	69144425	70327112	196.807	0.882451	212.466	0.874602	1.57511	0.823729	1.94167e-21	0.886732	1.44181e+06	0.169148	0.3998	0.278031
ANXA5	4	121167946	122196995	3485.55	0.603695	3578.83	0.580603	23.7917	0.231271	2.41399e-20	0.253026	2.08815e+06	0.0443851	0.641461	0.373473
ANXA6	5	150600706	151657815	6198.8	0.0763523	6206.5	0.0776545	30.0549	0.348328	3.81859e-20	0.0140094	3.02036e+06	0.0441344	0.471079	0.307601
ANXA7	10	72875101	73914076	3522.53	0.0111037	3227.17	0.0111033	6.6841	0.0164434	1.32739e-21	0.680301	1.20762e+06	0.106246	3.35166	1.17303
ANXA8	10	46960162	47984158	665.785	0.449813	698.994	0.440479	0.531649	0.621927	1.16095e-22	0.736648	1.71007e+06	0.0263944	0.61695	0.364332
ANXA8L1	10	45875627	46891784	3602.93	0.0186963	3666.73	0.0223813	8.09491	0.057734	1.26153e-20	0.0360597	1.96907e+06	0.0437851	0.713982	0.39998
ANXA9	1	150482249	151495634	2820.32	0.756	2836.2	0.763951	15.1978	0.588962	6.35028e-21	0.823615	1.01545e+06	0.117484	0.718534	0.40162
AOAH	7	36012941	37224549	11885.5	0.238774	12001.9	0.242754	70.9337	0.0904354	4.22105e-20	0.191318	1.03329e+06	0.135431	1.26535	0.583957
AOC1	7	150324627	151361504	4599.72	0.388638	4755.54	0.375143	21.4827	0.448239	1.82642e-20	0.850647	1.78889e+06	0.024231	2.19362	0.858289
AOC2	17	42344580	43350707	2766.56	0.412541	2812.81	0.410721	8.51025	0.409324	6.41018e-21	0.525104	2.31592e+06	0.0706904	0.0758437	0.106232
AOC3	17	42351184	43358130	2766.56	0.412541	2812.81	0.410721	8.51025	0.409324	6.41018e-21	0.525104	2.13015e+06	0.0205801	4.05838	1.35702
AOPEP	9	94226604	95651793	5375.08	0.181767	5604.15	0.158664	13.3576	0.262458	1.27285e-20	0.313061	1.42984e+06	0.164281	5.15134	1.63398
AOX1	2	200086014	201177064	5369.91	0.219737	5481.06	0.201943	28.7179	0.249259	2.43907e-20	0.155479	1.42869e+06	0.169507	0.00370725	0.0216145
AP1AR	4	111731740	112773110	2853.17	0.246706	2899.74	0.250395	9.6461	0.25955	7.08568e-21	0.513106	1.80621e+06	0.102431	0.0818381	0.110798
AP1B1	22	28827680	29888583	1552.08	0.906874	1537.08	0.915675	7.38611	0.932738	8.65572e-21	0.738545	156523	0.563235	0.585866	0.352595
AP1G1	16	71229000	72309201	1991.07	0.417344	2097.63	0.397739	12.0079	0.464466	4.19523e-21	0.605158	983430	0.333166	0.694905	0.39308
AP1G2	14	23059565	24068070	11341.6	0.0222268	11376	0.0300004	52.5612	0.159299	3.45663e-20	0.15627	3.08106e+06	0.00226328	1.71162	0.719479
AP1M1	19	15697854	16745906	9948.13	0.000103927	9986.28	0.000148261	21.991	0.274805	2.1075e-20	0.124163	1.8953e+06	0.0343479	0.979045	0.491558
AP1M2	19	10072671	11087315	5641.85	0.222972	5160.64	0.292385	29.6393	0.0245468	7.41069e-21	0.724513	1.78463e+06	0.20757	0.00237072	0.0172015
AP1S1	7	100654456	101661596	3179.79	0.458363	3121.55	0.481241	22.2783	0.188009	1.3619e-20	0.62358	1.55227e+06	0.0914443	0.599533	0.357777
AP1S3	2	223167680	224338027	11611.1	0.0117878	11891.7	0.00803121	73.3808	0.0246138	3.33107e-20	0.00958965	2.13827e+06	0.0142654	0.184405	0.175474
AP2A1	19	49267001	50307114	12172	0.0253441	12396.3	0.0218434	66.9039	0.0127842	1.99272e-20	0.2499	822225	0.091152	2.41541	0.920288
AP2A2	11	424881	1512245	9128.76	0.062171	9032.71	0.0641883	28.9792	0.0950221	1.67214e-20	0.63506	346164	0.576209	2.6343	0.980558
AP2B1	17	35078046	36226413	1905.36	0.686639	2038.97	0.665101	9.34759	0.838926	9.86984e-21	0.794361	1.42091e+06	0.171649	0.0390285	0.0739704
AP2M1	3	183674689	184684214	3880.37	0.248181	3827.78	0.240934	15.7686	0.351143	1.27943e-20	0.663091	2.68042e+06	0.00386608	0.227827	0.198501
AP2S1	19	46338136	47350846	10643.8	0.108643	10271.4	0.137579	25.6134	0.79734	2.19007e-20	0.83206	1.27657e+06	0.323483	0.414319	0.284176
AP3B1	5	77500522	78794762	6053.47	0.137952	5906.8	0.151603	20.801	0.223691	1.58349e-20	0.74606	142431	0.335407	0.151147	0.156492
AP3B2	15	82159281	83210112	743.506	0.838286	872.299	0.792694	15.6366	0.128034	5.37187e-21	0.435423	967246	0.116194	0.649198	0.376338
AP3D1	19	1600988	2664468	6826.42	0.543201	6851.55	0.551336	37.8142	0.394742	4.04529e-20	0.272523	1.58628e+06	0.583252	1.84372	0.758166
AP3M1	10	73620255	74650842	3495.3	0.0102612	3224.19	0.0111205	6.51226	0.0144083	5.12062e-21	0.558183	1.28008e+06	0.373551	1.71971	0.721862
AP3M2	8	41652946	42671673	2795.72	0.504129	2807.42	0.517286	18.2355	0.300079	1.41296e-20	0.442812	2.19876e+06	0.00382948	1.04126	0.512113
AP3S1	5	115341592	116414081	3749.89	0.850782	3631.64	0.868318	9.94894	0.539946	1.35843e-20	0.931966	1.65884e+06	0.0682732	0.0357957	0.0706128
AP3S2	15	89330599	90394638	6121.51	0.0423606	6181.83	0.0383241	14.304	0.279478	2.38814e-20	0.148513	1.09218e+06	0.312527	0.296191	0.231895
AP4B1	1	113394194	114405201	1920.12	0.735413	1854.88	0.725861	25.5246	0.287886	1.83461e-20	0.342647	636279	0.499013	0.131318	0.144439
AP4E1	15	50408672	51505895	1656.78	0.31109	1645.11	0.3349	10.9446	0.22312	1.73786e-20	0.0757873	846160	0.0595215	0.139137	0.149268
AP4M1	7	99601549	100610345	4271.98	0.0142397	4247.54	0.012131	1.16605	0.731519	2.83537e-21	0.736158	610390	0.815263	2.39539	0.914733
AP4S1	14	30525106	31630996	7362.97	0.0170188	7344.24	0.0179082	31.986	0.207079	9.9993e-21	0.735362	1.95459e+06	0.0488581	0.557833	0.34186
AP5B1	11	65273898	66280976	3139.17	0.162095	3068.04	0.165871	5.91975	0.591878	6.9463e-21	0.488403	1.10924e+06	0.00122988	0.10189	0.125186
AP5M1	14	56768924	57798742	10633	0.0353785	10563.5	0.0351787	38.8914	0.181555	2.3281e-20	0.0453594	1.24786e+06	0.276358	0.434709	0.292696
AP5S1	20	3320524	4328838	6521.22	0.250396	7045.48	0.214463	51.6761	0.442311	2.80629e-20	0.65604	1.26219e+06	0.254565	0.0313441	0.0657668
AP5Z1	7	4275615	5294397	2123.98	0.982137	2223.73	0.979341	16.8915	0.524574	1.95846e-20	0.850534	1.30374e+06	0.0194661	0.354217	0.258269
APAF1	12	98145290	99235433	4919.86	0.256241	5007.6	0.238283	20.826	0.0609584	2.76632e-20	0.110069	1.42574e+06	0.875536	0.354217	0.258269
APBA1	9	68927532	70172371	3590.38	0.883792	3577.35	0.890334	8.89777	0.883808	2.65282e-20	0.286049	1.9871e+06	0.0281693	1.30528	0.596448
APBA2	15	28384483	29618315	19583	0.000425619	19149.3	0.000400044	55.5595	0.0330788	3.73299e-20	0.0105391	1.48382e+06	0.321044	5.65705	1.75982
APBA3	19	3250772	4261692	7158.51	0.760091	6888.78	0.828513	24.9244	0.827687	2.40654e-20	0.817596	4.42828e+06	0.00525998	0.523272	0.328411
APBB1	11	5895125	6919414	6997.58	0.511524	7031.52	0.499809	31.4001	0.561824	3.11517e-20	0.472317	3.25456e+06	0.00192827	0.659117	0.379997
APBB1IP	10	25938341	27067803	2534.36	0.870395	2554.74	0.889932	14.903	0.856456	1.04133e-20	0.921324	1.46996e+06	0.861044	0.681641	0.388253
APBB2	4	40310027	41716714	5392.32	0.518016	5464.88	0.488459	38.1456	0.287142	2.01015e-20	0.947527	1.57344e+06	0.397493	0.385371	0.271855
APBB3	5	140058268	141064781	1718.73	0.463298	1792.82	0.444183	6.02906	0.503992	1.1391e-21	0.961883	2.03653e+06	0.220591	1.32525	0.602664
APC	5	112207518	113346239	8058.85	0.0950371	8390.35	0.0730619	36.4325	0.023954	1.30021e-20	0.899743	1.83664e+06	0.237346	0.0120726	0.0397633
APC2	19	946302	1973244	7667.7	0.422896	8009.19	0.395807	39.6016	0.420647	4.02088e-20	0.247074	438512	0.320882	0.711755	0.399177
APCDD1	18	9954635	10989949	8231.43	0.697952	8301.09	0.711468	25.4645	0.871979	3.58394e-20	0.749442	1.26688e+06	0.258739	3.55522	1.22652
APCDD1L	20	57959101	59015399	2854.72	0.863561	2978.46	0.866288	45.0694	0.129633	3.21493e-20	0.0452192	2.25049e+06	0.00968258	0.111934	0.131972
APCS	1	159087826	160088865	5991.97	0.307004	5987.64	0.337456	9.5768	0.812973	1.78881e-20	0.580214	2.14126e+06	0.0123407	0.0521707	0.0865421
APEH	3	49174014	50183971	4216.59	0.0180352	4538.26	0.01602	10.6592	0.00997643	1.02295e-20	0.0886178	1.46013e+06	0.142107	0.2238	0.196434
APELA	4	164377178	165398965	4829.01	0.348531	4863.37	0.373071	11.6327	0.687353	1.64163e-20	0.724957	349249	0.585411	0.251301	0.210306
APEX1	14	19955191	20957772	14234.7	0.243988	14506.3	0.228997	99.5682	0.0150219	9.56042e-20	0.000405175	1.36159e+06	0.245875	2.40056	0.916168
APH1A	1	149765399	150769580	2006.45	0.60417	1995.76	0.627097	6.62204	0.734627	3.10678e-21	0.646422	364225	0.444272	0.884868	0.459831
APH1B	15	62776018	63809126	17239.5	0.000354207	17471	0.000326479	32.2594	0.353864	4.57946e-20	0.00791852	2.76978e+06	0.00828522	0.615388	0.363747
API5	11	42811963	43844529	1949.18	0.932953	2035.88	0.937657	9.20416	0.962773	8.7347e-21	0.923458	1.4374e+06	0.0122965	2.40056	0.916168
APIP	11	34353094	35416379	8088.12	0.0299826	8280.05	0.0277713	25.7024	0.235464	3.27358e-20	0.0968271	1.53056e+06	0.231895	0.273305	0.221036
APLF	2	67967572	69155862	6463.23	0.0310251	6360.62	0.0331239	13.2659	0.527825	1.39894e-20	0.595435	1.91828e+06	0.159726	0.156901	0.159877
APLNR	11	56733577	57737250	4261.45	0.0361171	4295.6	0.030731	8.10464	0.372513	1.20427e-20	0.537138	1.53769e+06	0.149615	0.127349	0.141946
APLP1	19	35367899	36379792	10910.2	0.000542228	11411.9	0.000457098	25.233	0.245039	1.38701e-20	0.590553	3.21086e+06	0.000373729	1.67051	0.707323
APLP2	11	129568147	130644811	2567.89	0.830416	2673.41	0.796186	17.9352	0.485318	1.87627e-20	0.758571	1.28246e+06	0.018102	0.735459	0.40769
APMAP	20	24462925	25492751	528.484	0.95908	552.352	0.968945	5.87872	0.96343	9.10425e-21	0.89127	1.74771e+06	0.0328681	2.59363	0.969425
APOA1	11	116335751	117337622	3000.24	0.692073	2914.48	0.686796	12.8236	0.979104	1.73455e-20	0.893247	945888	0.752258	0.37604	0.267823
APOA2	1	160722292	161723631	5764.61	0.381466	5822.97	0.393349	37.341	0.019236	4.67301e-20	0.00873038	1.0431e+06	0.546108	0.0821794	0.111054
APOA4	11	116320700	117323304	2992.5	0.687279	2905.99	0.681257	12.8062	0.978811	1.70352e-20	0.878458	1.75419e+06	0.0289852	1.78792	0.74189
APOA5	11	116289367	117292420	2992.5	0.687279	2905.99	0.681257	12.8062	0.978811	1.70352e-20	0.878458	409574	0.300346	0.0393918	0.0743402
APOB	2	20501429	21544073	5220.11	0.656379	4896.23	0.70076	58.812	0.0729361	3.11153e-20	0.312471	1.75302e+06	0.0291552	4.16458e-05	0.00224196
APOBEC1	12	7149400	8165908	6002.86	0.928712	6010.64	0.938157	71.7591	0.0145576	4.92272e-20	0.0879922	1.75125e+06	0.0290545	1.63679	0.69731
APOBEC2	6	40553202	41564891	4363.32	0.568882	4620.83	0.580676	17.739	0.701333	2.93053e-20	0.205427	1.63312e+06	0.478714	0.301028	0.234154
APOBEC3A	22	38452741	39463184	2171.58	0.889591	2160.9	0.896413	9.09693	0.96025	1.08014e-20	0.865811	1.41562e+06	0.322987	1.99318	0.801319
APOBEC3B	22	38482347	39492804	2140.83	0.896248	2136.21	0.901837	8.77317	0.965295	9.92669e-21	0.899999	1.31612e+06	0.259635	0.0208749	0.0529977
APOBEC3C	22	38514257	39520352	1090.73	0.986671	1087.2	0.988607	8.77245	0.965293	7.64137e-21	0.959505	1.88377e+06	0.156341	0.0859054	0.11382
APOBEC3D	22	38521113	39533277	1090.73	0.986671	1087.2	0.988607	8.77245	0.965293	7.64137e-21	0.959505	1.86785e+06	0.164798	2.19939	0.859916
APOBEC3F	22	38540604	39555972	1090.73	0.986671	1087.2	0.988607	8.77245	0.965293	7.64137e-21	0.959505	1.8343e+06	0.167913	0.0889331	0.116033
APOBEC3G	22	38577067	39587743	977.465	0.986724	988.363	0.988799	9.3592	0.966445	7.81632e-21	0.96083	1.83821e+06	0.168318	0.0820484	0.110956
APOBEC3H	22	38597224	39604067	977.465	0.986724	988.363	0.988799	9.3592	0.966445	7.81632e-21	0.96083	1.81423e+06	0.173351	0.151144	0.15649
APOBEC4	1	183146275	184153316	4738.49	0.0301307	4435.77	0.0396366	15.1958	0.308734	1.43528e-20	0.317567	1.79019e+06	0.167007	0.0125264	0.0405361
APOBR	16	27994643	28998964	3014.69	0.0597299	3213.23	0.0444832	22.8934	0.0139613	2.58936e-20	0.00182029	1.84569e+06	0.131935	0.873808	0.456052
APOC1	19	44414247	45419349	2358.48	0.946157	2548.83	0.922707	24.227	0.216381	2.64715e-20	0.360338	294110	0.0857096	5.54164	1.73121
APOC2	19	44446035	45449565	2354.99	0.943135	2545.71	0.919242	24.2171	0.213637	2.63501e-20	0.315217	1.07366e+06	0.508453	3.38507	1.18184
APOC3	11	116329706	117333072	3000.24	0.692073	2914.48	0.686796	12.8236	0.979104	1.73455e-20	0.893247	1.04459e+06	0.494182	0.085431	0.113471
APOC4	19	44442237	45445496	2354.99	0.943135	2545.71	0.919242	24.2171	0.213637	2.63501e-20	0.315217	1.0465e+06	0.530054	0.0676827	0.0997743
APOC4-APOC2	19	44442238	45449565	2354.99	0.943135	2545.71	0.919242	24.2171	0.213637	2.63501e-20	0.315217	1.75406e+06	0.0290138	2.91474	1.05664
APOD	3	195068705	196084033	3931.68	0.367597	4076.67	0.378368	35.6411	0.375995	2.87684e-20	0.381348	1.04394e+06	0.538744	0.536503	0.333589
APOE	19	44405791	45409393	2358.48	0.946157	2548.83	0.922707	24.227	0.216381	2.64715e-20	0.360338	1.04694e+06	0.534434	0.655452	0.378647
APOF	12	55860568	56862857	8362.56	0.00875399	8524.06	0.00950515	14.5993	0.275672	3.86735e-21	0.934376	76122.3	0.465832	1.01435	0.50326
APOH	17	65712033	66756525	3432.83	0.184225	3334.72	0.186495	11.0085	0.318532	1.4314e-20	0.612768	1.04452e+06	0.498267	1.60736	0.688536
APOL1	22	35753071	36767530	3670.21	0.437224	3659.29	0.478859	14.6529	0.768585	1.18716e-20	0.966137	1.28341e+06	0.192875	1.93015	0.783197
APOL2	22	35726209	36739954	3594.28	0.321101	3581.86	0.366286	14.6451	0.825155	1.17921e-20	0.965898	1.63277e+06	0.0434784	0.618492	0.36491
APOL3	22	35640329	36666177	3681.67	0.322911	3624.3	0.375413	22.1116	0.562159	1.41947e-20	0.934798	1.73145e+06	0.0345871	2.08751	0.828249
APOL4	22	35689124	36704840	3619.13	0.334364	3612.25	0.383063	15.167	0.867185	1.21173e-20	0.973513	1.75553e+06	0.033511	0.00495653	0.0250863
APOL5	22	35217872	36229483	3682.47	0.521687	3752.79	0.539738	21.0328	0.422687	1.81223e-20	0.818576	1.74168e+06	0.0327426	0.747736	0.412071
APOL6	22	35148446	36168404	3124.66	0.674873	3121.02	0.687405	23.7746	0.513644	1.91081e-20	0.671439	1.72957e+06	0.0362306	0.0189459	0.0503555
APOLD1	12	12225917	13329975	15063.5	0.036796	15148.5	0.0405762	52.2149	0.326449	4.73893e-20	0.148728	1.0255e+06	0.249719	0.294997	0.231335
APOM	6	31152416	32158210	1985.91	0.859365	2047.13	0.869139	30.7702	0.700194	4.19288e-20	0.663494	1.08426e+06	0.375449	0.245841	0.207595
APP	21	25380535	26671128	10971.5	0.0188165	11143.3	0.0179275	46.0155	0.304044	3.29808e-20	0.216682	1.58774e+06	0.0807772	0.0453063	0.0801682
APPBP2	17	59943158	61026242	2788.67	0.154639	2915.45	0.150956	7.74539	0.155641	7.70957e-21	0.0943683	1.12177e+06	0.276574	0.253214	0.211251
APPL1	3	56727726	57778105	3761.95	0.599954	3845.44	0.58887	16.5785	0.696018	2.23309e-20	0.42319	2.37107e+06	0.0523537	0.0227414	0.0554524
APPL2	12	104673297	105736203	1895.42	0.676017	2188.13	0.594309	39.1642	0.225343	1.36067e-20	0.329172	1.37355e+06	0.352745	0.655452	0.378647
APRT	16	88309339	89311937	5696.31	0.977927	5798.5	0.978939	32.4476	0.774974	2.75993e-20	0.920888	1.28825e+06	0.0195868	0.0351738	0.069952
APTX	9	32386601	33525130	6655.64	0.431311	6854.39	0.439851	27.4817	0.537025	5.02181e-20	0.00474096	1.17085e+06	0.20468	1.70158	0.716515
AQP1	7	30411853	31425517	1012.85	0.987944	954.019	0.991745	8.577	0.77402	7.50622e-21	0.907363	1.23977e+06	0.291516	1.06091	0.518547
AQP10	1	153821090	154825325	23234.7	4.55444e-09	24905	3.32958e-09	45.2053	0.0379744	2.6167e-20	0.32034	1.40091e+06	0.448798	0.0370218	0.071901
AQP11	11	77089391	78110356	1988.17	0.212038	1983.15	0.240404	5.69862	0.829106	4.67077e-21	0.883144	1.3783e+06	0.0832641	0.572514	0.347501
AQP12A	2	240191866	241198483	2346.88	0.935042	2269.95	0.944892	11.2877	0.972156	1.53364e-20	0.98053	561263	0.227294	0.628424	0.368623
AQP12B	2	240176418	241182906	2165.61	0.936078	2095.48	0.946292	11.2226	0.971864	1.51611e-20	0.980111	1.03041e+06	0.82159	3.02464	1.08614
AQP2	12	49450737	50458878	3629.31	0.13088	3854.58	0.130683	10.8872	0.702236	1.11184e-20	0.62698	57916.3	0.603193	0.343947	0.253709
AQP3	9	32941156	33947596	3616.79	0.633075	3848.97	0.597524	34.2685	0.0758233	2.04531e-20	0.374816	57551.2	0.617411	0.240128	0.204736
AQP4	18	26352043	27365771	3221.1	0.913022	3325.71	0.906304	30.3007	0.328221	1.86887e-20	0.857739	1.6725e+06	0.0305973	4.12661	1.37454
AQP5	12	49461872	50465682	3579.87	0.120747	3798.19	0.119572	10.6583	0.68342	1.09789e-20	0.610997	968779	0.578526	1.25158	0.57963
AQP6	12	49467194	50477139	6646.98	0.0110905	6710.57	0.013166	12.6604	0.57137	1.12176e-20	0.592712	1.6017e+06	0.597479	0.0575368	0.0912832
AQP7	9	32883179	33902682	5152.62	0.418063	5387.79	0.40234	38.023	0.0709538	4.94594e-20	0.00600462	1.70097e+06	0.0274829	7.89119	2.30385
AQP7B	2	94087101	95112744	708.623	0.173918	696.968	0.174921	0.0531805	0.462444	2.07947e-22	0.630506	1.76458e+06	0.0232505	1.18819	0.55957
AQP8	16	24715731	25728932	4319.96	0.335619	4210.89	0.348529	30.5582	0.045238	3.59743e-20	0.0338486	986843	0.647917	5.91059	1.82246
AQP9	15	57638169	58685911	9253.41	0.124545	9259.84	0.148059	47.3728	0.310989	4.14745e-20	0.130101	1.3841e+06	0.0912522	0.422052	0.287422
AQR	15	34351782	35469742	9102	0.049094	9245.06	0.0509431	36.9136	0.23205	1.72377e-20	0.880312	1.20438e+06	0.367387	0.0686801	0.10058
ARAP1	11	72185069	73293599	15135	0.000388174	14780.8	0.000495549	25.2441	0.0575104	9.71886e-21	0.587086	1.44975e+06	0.0452844	0.0791109	0.108738
ARAP2	4	35448221	36744514	5448.75	0.256292	5643.45	0.232081	19.4743	0.0413378	1.96949e-20	0.29965	1.56e+06	0.148032	5.37951	1.69091
ARAP3	5	141153401	142182230	2274.62	0.849258	2316.74	0.845209	23.4206	0.489852	2.2143e-20	0.292166	2.22326e+06	0.0149318	5.73521	1.77916
ARC	8	142111049	143114479	4671.5	0.721048	4867.63	0.703095	9.21966	0.994483	6.59128e-21	0.999932	1.97396e+06	0.0525815	5.71164	1.77333
ARCN1	11	118072390	119103033	3800.72	0.159236	3903.37	0.153383	13.902	0.134882	2.08233e-20	0.0314304	373175	0.862131	0.224383	0.196734
AREG	4	73945136	74955005	2257.92	0.741113	2298.51	0.743733	13.5813	0.332831	1.10323e-20	0.296325	346214	0.376964	0.00857068	0.033277
AREL1	14	74153437	75213117	2927.32	0.621248	2989.14	0.609702	7.81466	0.573428	6.43017e-21	0.758375	1.60835e+06	0.0800875	0.0539131	0.0881029
ARF1	1	227582708	228599212	1824.68	0.723415	2244.77	0.58465	46.1209	0.00457812	8.13398e-21	0.637127	1.13074e+06	0.156598	3.80945	1.29274
ARF3	12	48435723	49457487	838.613	0.746589	859.188	0.724929	4.73266	0.973062	1.46738e-20	0.109261	1.11816e+06	0.189756	5.69307	1.76873
ARF4	3	57071363	58098220	3920.72	0.178429	4050.23	0.162965	6.82094	0.44837	1.19556e-20	0.126301	80608.7	0.310509	5.65249	1.75869
ARF5	7	127088386	128091700	1566.07	0.271871	1587.36	0.26742	3.49455	0.729638	5.94119e-21	0.446657	1.41177e+06	0.224898	0.149315	0.155404
ARF6	14	49393079	50397054	5380.94	0.014798	5433.64	0.0131174	14.7181	0.797291	3.61126e-20	0.0206005	1.46744e+06	0.0166943	0.0228686	0.0556164
ARFGAP1	20	62772785	63789790	18841	0.0131463	19060.3	0.0156377	51.0634	0.161374	4.07258e-20	0.297242	642712	0.410514	5.20478	1.64734
ARFGAP2	11	46664299	47677125	8436.21	0.000294342	8829.24	0.000225513	12.5757	0.448919	2.92184e-21	0.803724	1.41278e+06	0.0827661	5.20478	1.64734
ARFGAP3	22	42296502	43358106	9502.99	0.00370679	10128	0.00258208	78.1361	0.0238426	3.60198e-20	0.0876527	1.52752e+06	0.226557	1.08212	0.525457
ARFGEF1	8	66673511	67843781	2510.94	0.410704	2506.59	0.439279	4.67657	0.854584	7.52447e-21	0.7972	1.0258e+06	0.103836	1.05532	0.516721
ARFGEF2	20	48421711	49536693	2987.98	0.0702035	2934.68	0.0730436	4.39865	0.70854	1.53657e-20	0.22991	1.58481e+06	0.103567	2.34661	0.901164
ARFGEF3	6	137661939	138844663	3235.58	0.558199	3400.74	0.548144	12.379	0.702981	1.65825e-20	0.5767	2.16271e+06	0.0664292	2.92392	1.05911
ARFIP1	4	152279937	153418463	5134.2	0.54011	5138.75	0.537445	9.55788	0.522679	2.5185e-20	0.184352	1.4683e+06	0.242673	1.66135	0.704608
ARFIP2	11	5974683	6981479	7665.79	0.446081	7672.53	0.435668	31.9194	0.613986	2.80281e-20	0.660601	526637	0.558684	7.11413	2.11646
ARFRP1	20	63198642	64208025	13832.8	0.0499476	13981.3	0.0543141	35.2088	0.244226	3.54966e-20	0.211795	1.07691e+06	0.0158207	1.27462	0.586864
ARG1	6	130970832	132084332	1965.39	0.834185	1905.7	0.842075	6.66176	0.896585	6.12672e-21	0.664953	1.61345e+06	0.313588	0.627985	0.36846
ARG2	14	67119920	68151708	8667.46	0.0307199	8806.71	0.0278189	20.2574	0.0839815	1.33891e-20	0.0842442	1.37738e+06	0.214177	0.807192	0.43303
ARGFX	3	121067949	122090622	19270.3	3.33861e-07	18243.7	2.73153e-07	20.1873	0.0909766	6.11515e-21	0.814085	1.30649e+06	0.0567749	0.193663	0.180531
ARGLU1	13	106041673	107068137	6112.33	0.647452	6199.71	0.655848	15.2255	0.785876	2.59543e-20	0.607788	1.83175e+06	0.116265	0.0385726	0.0735043
ARHGAP1	11	46177080	47200619	9081.5	7.32919e-05	9563.29	6.91009e-05	14.6393	0.204353	5.44639e-21	0.204165	1.18643e+06	0.173616	0.206676	0.187497
ARHGAP10	4	147232063	148572776	17602.1	0.00441506	17744.3	0.00448188	33.2043	0.336919	1.93048e-20	0.275612	921716	0.490503	0.035874	0.0706956
ARHGAP11A	15	32115144	33139941	8341.6	0.119334	8447.74	0.0994241	17.7588	0.0391569	2.32959e-20	0.3554	921818	0.1848	0.0189459	0.0503555
ARHGAP11A-SCG5	15	32113860	33197095	9438.62	0.0654848	9386.39	0.0584742	24.4393	0.00555558	3.4925e-20	0.0666152	1.67729e+06	0.00140684	1.88863	0.771199
ARHGAP11B	15	30124494	31149529	4410.17	0.0547703	4466.07	0.0481943	35.129	0.00545787	3.37647e-20	0.00157326	1.30749e+06	0.327159	0.0960314	0.121108
ARHGAP12	10	31305398	32428876	1902.22	0.503426	1903.78	0.512377	17.0373	0.277938	1.275e-20	0.512705	1.33126e+06	0.332754	0.4601	0.30314
ARHGAP15	2	142591362	144268352	7113.92	0.207179	7374.36	0.209302	35.6846	0.338867	2.22348e-20	0.48228	1.16763e+06	0.315597	0.132433	0.145134
ARHGAP17	16	24419389	25515666	4797.19	0.37295	4714.79	0.407547	31.1132	0.123469	2.84415e-20	0.19703	1.19696e+06	0.320764	0.575261	0.348552
ARHGAP18	6	129076132	130210177	4074.24	0.517924	4086.57	0.5509	33.3862	0.156869	4.26978e-20	0.0186579	700224	0.0210168	0.00218388	0.0164969
ARHGAP19	10	96722173	97792673	5021.23	0.321824	4808.03	0.328774	13.9576	0.701709	1.26991e-20	0.745236	1.25301e+06	0.527141	0.424512	0.288451
ARHGAP19-SLIT1	10	96653045	97792637	5021.23	0.321824	4808.03	0.328774	13.9576	0.701709	1.26991e-20	0.745236	1.00179e+06	0.745723	3.98916	1.33919
ARHGAP20	11	110077042	111213189	1350.71	0.822706	1413.96	0.808954	12.6468	0.58734	2.37536e-20	0.084586	635918	0.177603	1.74037	0.727946
ARHGAP21	10	24083609	25223887	4336.64	0.280874	4494.71	0.248556	27.5541	0.0714384	2.56139e-20	0.0521046	658663	0.243025	0.116369	0.134892
ARHGAP22	10	47946036	49156265	4969.47	0.843493	5114.76	0.824279	19.8967	0.262019	1.70958e-20	0.502235	2.02004e+06	0.0101232	0.038425	0.073353
ARHGAP23	17	37919280	39012385	424.497	0.530855	393.982	0.581638	10.595	0.260904	5.53055e-21	0.315382	1.41173e+06	0.400347	0.197138	0.182408
ARHGAP24	4	84975150	86502668	8351.3	0.156513	8300.51	0.152756	21.5709	0.477449	2.18504e-20	0.272842	1.73945e+06	0.102897	0.450744	0.299312
ARHGAP25	2	68179601	69326833	6363.55	0.0308877	6299.22	0.0320382	5.22413	0.787236	1.28713e-20	0.507169	2.19298e+06	0.0522575	0.00133941	0.0128677
ARHGAP26	5	142270377	143729011	6709.67	0.0677241	6444.9	0.0712191	54.996	0.0237737	2.31453e-20	0.164886	2.13558e+06	0.0654649	5.15508	1.63492
ARHGAP27	17	44893902	45934421	8209.88	0.00549905	8123.02	0.00602126	10.0354	0.723409	6.95977e-21	0.942391	3.38355e+06	0.000174014	2.53864	0.954323
ARHGAP28	18	6229716	7415716	13716.5	0.35652	13555.4	0.373148	65.1918	0.152211	7.20116e-20	0.0489795	444872	0.125145	0.859639	0.451193
ARHGAP29	1	93648988	94775068	5386.59	0.477333	5522.21	0.473368	14.818	0.770882	1.63613e-20	0.710649	1.16351e+06	0.397917	0.349005	0.25596
ARHGAP30	1	160546946	161569970	4472.73	0.502176	4641.23	0.48917	28.3813	0.173025	3.7405e-20	0.020649	1.68222e+06	0.49571	1.25223	0.579836
ARHGAP31	3	118794383	119920714	4933.86	0.284776	5289.6	0.271283	28.3758	0.335699	1.64795e-20	0.609326	862306	0.422507	0.466568	0.305772
ARHGAP32	11	128465060	129779324	3686.01	0.909131	4012.98	0.861948	27.5213	0.91327	2.6709e-20	0.762259	395589	0.356451	1.74366	0.728913
ARHGAP33	19	35274532	36288822	11313.5	0.000875136	11851.9	0.000719089	26.0635	0.23749	1.78558e-20	0.608077	1.58232e+06	0.0438113	0.342148	0.252905
ARHGAP35	19	46360997	47505077	12891.9	0.0655731	12402.6	0.0862649	37.9963	0.591463	2.91496e-20	0.6002	969157	0.42185	0.126284	0.141272
ARHGAP39	8	144029179	145185846	26774.4	2.76886e-07	27768.8	2.42955e-07	15.4261	0.0247869	4.83579e-21	0.315375	1.73208e+06	0.0109447	2.01161	0.806599
ARHGAP40	20	38101809	39151035	3112.6	0.780832	3157.53	0.772736	13.711	0.449708	9.73986e-21	0.575476	1.10116e+06	0.137857	3.40879	1.18809
ARHGAP42	11	100187288	101493941	2644.28	0.337627	2615.04	0.34363	28.8998	0.39838	1.9942e-20	0.668838	333405	0.21553	0.149905	0.155755
ARHGAP44	17	12289498	13491643	8580.76	0.648788	8556.97	0.651658	39.2355	0.611119	3.98141e-20	0.238086	2.29878e+06	0.0675387	3.24791	1.14561
ARHGAP45	19	565923	1586628	7881.96	0.618192	8209.4	0.586123	48.1168	0.269137	5.24055e-20	0.120075	1.24601e+06	0.0056582	0.333798	0.249159
ARHGAP5	14	31576114	32659728	3772.46	0.884025	3569.64	0.900394	21.3664	0.477219	1.7022e-20	0.64825	2.00313e+06	0.0100578	3.34911	1.17236
ARHGAP8	22	44252558	45362788	8826.8	0.448069	8688.42	0.471311	43.1189	0.729042	4.1012e-20	0.698872	2.12108e+06	0.0147673	3.56183	1.22825
ARHGAP9	12	56972264	57988814	951.169	0.784928	1022.72	0.769433	5.98022	0.57943	5.57541e-21	0.736055	1.21449e+06	0.28766	0.236014	0.202663
ARHGDIA	17	81367721	82371378	8414.53	0.0357566	7912.72	0.052471	46.6468	0.0631758	3.38231e-20	0.0150931	1.01022e+06	0.596357	2.14397	0.844266
ARHGDIB	12	14442031	15461728	4950.1	0.227547	4827.75	0.243312	7.91757	0.394521	1.71602e-20	0.121807	1.3545e+06	0.0146283	0.305919	0.236426
ARHGDIG	16	1	783010	1458.01	0.975079	1505.2	0.972935	18.5809	0.106519	1.10445e-20	0.312441	1.27721e+06	0.219577	0.305919	0.236426
ARHGEF1	19	41383173	42430150	807.703	0.729467	792.737	0.730442	10.1424	0.435789	9.98182e-21	0.50597	1.07673e+06	0.38555	0.0970375	0.121815
ARHGEF10	8	1323926	2458641	13149.8	0.132785	12694.1	0.164235	67.1666	0.132054	5.95101e-20	0.187023	1.78636e+06	0.00178449	0.577205	0.349294
ARHGEF10L	1	17039698	18197874	15016	0.0509617	14989	0.0555535	45.996	0.647008	5.92986e-20	0.00207705	1.6317e+06	0.0464559	0.0698178	0.101493
ARHGEF11	1	156434840	157545742	7102.61	0.314993	7844.16	0.225515	70.1903	0.0226742	3.66093e-20	0.243303	2.42228e+06	0.00519827	0.0129713	0.0412815
ARHGEF12	11	119836413	120989937	7249.7	0.196866	7196.19	0.196651	28.1759	0.695244	2.41726e-20	0.744569	1.2814e+06	0.609885	0.0173326	0.0480515
ARHGEF15	17	7810241	8822514	12099.6	0.00817329	11910.2	0.00814365	9.70064	0.724426	2.57085e-20	0.180191	500381	0.28851	3.57828	1.23255
ARHGEF16	1	2954665	3981113	12427.7	0.100579	12233.6	0.115461	23.0002	0.84542	2.73093e-20	0.840012	1.16496e+06	0.299153	0.61343	0.363012
ARHGEF17	11	72808276	73869388	12008.6	0.00183215	11932.9	0.00171239	23.5979	0.179841	5.73934e-21	0.817081	1.40999e+06	0.19722	0.34564	0.254463
ARHGEF18	19	6848937	7972485	14954.3	0.0248128	14912.4	0.0281088	44.9688	0.336998	3.10242e-20	0.913987	1.57528e+06	0.800487	2.05693	0.819544
ARHGEF19	1	15697854	16712652	1949.26	0.787496	2180.71	0.770336	24.1021	0.34178	4.03623e-20	0.00120332	2.24799e+06	0.0507892	0.090049	0.116841
ARHGEF2	1	155446851	156507070	2780.99	0.680661	2559.82	0.717358	14.6445	0.229683	1.5675e-20	0.0543967	1.55301e+06	0.381457	0.0605523	0.093867
ARHGEF25	12	57110180	58117245	2230.33	0.403743	2331.89	0.399124	6.28289	0.690663	5.57292e-21	0.806385	1.51245e+06	0.0727184	0.0683797	0.100338
ARHGEF26	3	153621003	154757827	1101.14	0.794836	1196.21	0.767325	36.1343	0.0556248	3.02894e-20	0.0625898	651573	0.0822947	0.370863	0.265573
ARHGEF28	5	73126158	74441993	7135.29	0.120079	7710.02	0.091887	115.031	0.00228509	3.96328e-20	0.112852	1.45276e+06	0.0149655	4.62362	1.50121
ARHGEF3	3	56227418	57579329	3955.27	0.728542	4057.84	0.724962	16.8709	0.690587	2.39798e-20	0.443803	610451	0.237784	0.321855	0.243748
ARHGEF33	2	38389875	39475454	6555.67	0.0170309	6737.26	0.0171802	21.6609	0.0416939	1.7467e-20	0.0500711	2.28918e+06	0.0230399	0.604968	0.359828
ARHGEF35	7	143686083	144695879	1382.64	0.590634	1448.16	0.558196	8.25859	0.550014	4.75951e-21	0.6579	1.81354e+06	0.0273308	4.43944	1.45447
ARHGEF37	5	149051947	150134968	4366.57	0.421674	4334.14	0.425753	11.1822	0.969074	1.70091e-20	0.902015	2.07507e+06	0.134587	0.0119561	0.0395627
ARHGEF38	4	105052620	106208093	2976.55	0.53823	3147.97	0.500509	15.6397	0.457262	1.6652e-20	0.362043	546071	0.00495315	0.0119561	0.0395627
ARHGEF39	9	35158875	36175866	4702.61	0.233433	4447.25	0.27929	14.0214	0.0595163	1.51779e-20	0.538565	392714	0.164495	0.104352	0.126872
ARHGEF4	2	130336914	131547263	10356.7	0.0241734	10537	0.0243998	19.0933	0.101998	5.57199e-20	2.94706e-05	1.17956e+06	0.464629	0.301263	0.234263
ARHGEF40	14	20570273	21590248	10226.4	0.337701	10329.2	0.328095	61.0859	0.0303597	5.73921e-20	0.0729041	1.10856e+06	0.352414	1.13552	0.542722
ARHGEF5	7	143855288	144880632	1018.44	0.71739	1002.12	0.715383	2.42721	0.85512	3.60816e-21	0.844224	1.34835e+06	0.17159	3.28205	1.15465
ARHGEF7	13	110614559	111805737	10271.5	0.487613	10349.1	0.520549	32.0945	0.853693	5.24165e-20	0.406893	1.50888e+06	0.521643	0.0827128	0.111453
ARID1A	1	26193236	27282104	6705.31	0.0776514	6596.03	0.0760354	23.0871	0.111888	1.87847e-20	0.126596	368631	0.00687297	0.00454652	0.0239982
ARID1B	6	156276020	157710779	3559.16	0.838855	3684.3	0.823701	30.4485	0.226044	1.65227e-20	0.765782	1.81938e+06	0.0997091	0.143496	0.151916
ARID2	12	45229706	46408040	5181.98	0.151796	5017.53	0.163974	7.16709	0.66358	7.60976e-21	0.398853	2.00353e+06	0.351329	0.120639	0.137664
ARID3A	19	425781	1475939	8778.65	0.673299	9085.06	0.644854	44.4818	0.46831	6.13826e-20	0.104205	556703	0.252285	0.95235	0.482643
ARID3B	15	74041206	75098131	10434.1	0.00375563	10528.3	0.00333997	15.1741	0.336475	1.88751e-20	0.0883027	1.38708e+06	0.210438	3.2488	1.14584
ARID3C	9	34121049	35129066	3281.12	0.119794	3188.63	0.127341	6.02075	0.727622	6.58211e-21	0.894699	2.64506e+06	0.00359976	2.077	0.825259
ARID4A	14	57798504	58873887	3519.53	0.174702	3648.59	0.162413	12.5858	0.694732	2.0237e-20	0.489352	1.15299e+06	0.178277	2.3347	0.897842
ARID4B	1	234631634	235828219	1881.02	0.991115	1830.74	0.994013	10.4662	0.9493	7.84352e-21	0.98342	1.83882e+06	0.0109046	0.505123	0.321247
ARID5A	2	96036743	97052634	147.064	0.855592	135.397	0.876636	2.21388	0.573704	3.80891e-21	0.517612	1.50199e+06	0.0927806	0.0365952	0.0714548
ARID5B	10	61401684	62596944	23453.8	3.15898e-07	23066.9	2.887e-07	26.5523	0.200105	3.55778e-20	0.0461427	56136.7	0.88133	0.0169843	0.0475417
ARIH1	15	71974330	73102987	20884.3	0.000344381	21762	0.000319938	40.0506	0.0532974	1.51862e-20	0.0764231	958230	0.17804	2.14652	0.844987
ARIH2	3	48418821	49486382	2240.62	0.124859	2414.59	0.118834	4.1297	0.338888	6.20364e-22	0.94412	1.58857e+06	0.0175931	2.40959	0.918674
ARL1	12	100893116	101907772	939.945	0.834944	921.763	0.857714	27.7619	0.153052	1.43888e-20	0.379382	2.31853e+06	0.0243454	0.0203581	0.052301
ARL10	5	175865487	176901865	22508.2	1.10702e-05	22600.7	1.16147e-05	34.8774	0.107085	4.00621e-20	0.0213531	1.43981e+06	0.231195	0.013522	0.0421881
ARL11	13	49128507	50133872	3180.72	0.173726	3177.17	0.170128	10.4653	0.565039	1.75442e-20	0.122305	687750	0.496472	1.31665	0.59999
ARL13B	3	93480139	94555678	799.748	0.352609	858.585	0.321085	3.45733	0.366089	4.00201e-21	0.259203	674159	0.0733982	0.0989104	0.123124
ARL14	3	160177160	161178448	898.157	0.581888	876.216	0.556132	3.39019	0.836293	1.47004e-21	0.865061	1.36572e+06	0.243336	1.21508	0.568109
ARL14EP	11	29823104	30838223	3108.32	0.558072	3208.02	0.533425	18.328	0.270473	2.48373e-20	0.182013	826352	0.369994	0.217307	0.193075
ARL14EPL	5	115532324	116560118	4311.64	0.549914	4306.17	0.541372	8.01567	0.788998	1.29825e-20	0.91344	351291	0.354042	0.0797663	0.109236
ARL15	5	53383942	54810582	5884.11	0.420494	5877.51	0.43879	60.0401	0.0819551	4.07971e-20	0.23986	1.62305e+06	0.304369	3.36976	1.17781
ARL16	17	81181187	82183797	7900.94	0.0821857	7583.83	0.108916	68.2139	0.126758	3.98077e-20	0.01149	1.15772e+06	0.0904622	4.0043	1.34309
ARL17A	17	45999780	47079695	4257.77	0.13353	4384.22	0.137053	11.6516	0.5726	8.56904e-21	0.49295	3.36919e+06	0.0277942	2.12745	0.839587
ARL17B	17	45774784	46861766	4024.15	0.184842	4173.65	0.186099	11.9795	0.583481	9.27218e-21	0.374468	1.25346e+06	0.301495	0.794069	0.428439
ARL2	11	64514160	65522184	2843.64	0.269012	2771.11	0.269533	5.3011	0.76074	9.64588e-21	0.615039	1.18425e+06	0.172896	0.268258	0.218602
ARL2-SNX15	11	64514182	65540570	2843.64	0.269012	2771.11	0.269533	5.3011	0.76074	9.64588e-21	0.615039	1.06706e+06	0.121514	0.483893	0.312771
ARL2BP	16	56745259	57753635	6293.63	0.149298	6312.82	0.159258	43.0366	0.0799527	3.44791e-20	0.213278	2.02761e+06	0.102963	0.240479	0.204913
ARL3	10	102173731	103214397	1477.96	0.685818	1401.7	0.702539	7.32512	0.189812	4.37658e-21	0.382043	2.05368e+06	0.119782	0.0535012	0.0877359
ARL4A	7	12186856	13190958	919.453	0.983897	964.801	0.982714	7.68387	0.923823	8.09816e-21	0.947047	1.28185e+06	0.0180929	5.98048	1.83968
ARL4C	2	233993041	234997081	5744.55	0.500383	5993.91	0.457615	53.4987	0.0666863	4.53529e-20	0.116902	612036	0.575124	0.00063245	0.00880208
ARL4D	17	42898993	43901137	3510.73	0.381996	3651.38	0.355448	12.2387	0.281121	6.42861e-21	0.838762	1.52426e+06	0.0811535	1.16204	0.551228
ARL5A	2	151288984	152328492	1647.66	0.535732	1689.17	0.560399	7.78736	0.610091	9.75016e-21	0.455848	47627.1	0.942342	1.65713	0.703354
ARL5B	10	18159431	19181639	2781.46	0.0431509	2791.7	0.0498905	9.98173	0.839677	2.61349e-20	0.181207	1.87062e+06	0.167814	0.579003	0.349981
ARL5C	17	38656894	39667484	1607.58	0.496095	1694.85	0.505917	24.0325	0.348893	1.13458e-20	0.460024	389886	0.238223	2.30694	0.890093
ARL6	3	97264521	98301229	2646.09	0.526293	2644.3	0.564985	3.65538	0.959734	7.4687e-21	0.711287	2.14368e+06	0.0715048	0.012309	0.0401675
ARL6IP1	16	18291669	19301572	3560.99	0.277497	3502.23	0.281977	11.6008	0.543223	9.71608e-21	0.545465	1.84481e+06	0.133288	0.454985	0.30105
ARL6IP4	12	122480060	123482913	955.033	0.714267	1044.64	0.643167	7.16935	0.581292	2.07559e-20	0.0755823	766896	0.18715	2.57287	0.963728
ARL6IP5	3	68584937	69606092	7682.61	0.0179339	8094.38	0.0123342	42.0117	0.109032	2.50397e-20	0.199434	2.67384e+06	0.027973	0.0176223	0.0484722
ARL6IP6	2	152217647	153262396	5415.91	0.245749	5471.74	0.221817	48.0221	0.0459883	4.72741e-20	0.0132657	1.10311e+06	0.199069	1.21979	0.569598
ARL8A	1	201633404	202644743	1717.2	0.980621	1770.24	0.981138	19.5638	0.295034	1.10709e-20	0.929041	3.8786e+06	0.000245268	0.166824	0.165611
ARL8B	3	4622249	5680911	14137.8	0.198782	14308.6	0.18443	56.067	0.302786	6.54554e-20	0.0719341	515893	0.0207487	1.3295	0.603986
ARL9	4	56005209	57024959	3130.74	0.850258	3307.22	0.846916	17.2285	0.679016	1.84187e-20	0.511471	56467	0.644497	1.54939	0.671161
ARMC1	8	65102458	66134217	3905.41	0.324773	3880.66	0.344888	14.8815	0.595934	1.16466e-20	0.652156	1.87958e+06	0.0748654	0.132674	0.145284
ARMC10	7	102574881	103599759	4574.76	0.0550092	4651.53	0.058565	16.8154	0.322505	2.4366e-20	0.0922716	1.24813e+06	0.265627	2.04273	0.815494
ARMC12	6	35237032	36249079	375.932	0.943132	390.39	0.944951	6.43333	0.782452	9.2012e-21	0.888769	1.15916e+06	0.257914	4.84749	1.55773
ARMC2	6	108348416	109474476	3348.13	0.196565	3554.33	0.1848	24.1438	0.134845	1.26653e-20	0.0963645	834348	0.350849	3.30837	1.1616
ARMC3	10	22428024	23538523	8722.17	0.00431359	8803.25	0.00445288	10.0728	0.228904	5.79105e-21	0.613025	1.13222e+06	0.130566	4.0981	1.36723
ARMC5	16	30958080	31967166	16997.8	3.8561e-05	16838.3	3.74444e-05	5.44294	0.316418	1.48388e-20	0.204223	902332	0.152216	0.00275904	0.018585
ARMC6	19	18533575	19560311	1387.42	0.7159	1411.71	0.696933	8.30873	0.496394	4.89163e-21	0.632146	1.56424e+06	0.168315	6.72342	2.02157
ARMC7	17	74609952	75630272	13023.3	0.00495566	13285.2	0.00427144	45.9321	0.0406519	3.65698e-20	0.0206899	1.07994e+06	0.276916	0.0656542	0.0981208
ARMC8	3	137687248	138798384	1806.9	0.307081	1871.64	0.342104	11.8102	0.573807	6.00665e-21	0.750661	3.16437e+06	0.0169457	1.87351	0.766816
ARMC9	2	230698546	231876848	2262.52	0.908852	2325.22	0.915852	7.70327	0.980004	8.54327e-21	0.951782	1.19825e+06	0.201845	2.49752	0.942998
ARMH1	1	44174692	45225591	8657.85	0.0185811	9057.96	0.0156374	34.2646	0.00221011	1.84914e-20	0.281156	524764	0.530159	0.102991	0.125942
ARMH2	6	24297335	25298917	4747.05	0.536083	4915.4	0.533105	19.9841	0.511685	1.11391e-20	0.971167	35614.7	0.976812	3.56792	1.22984
ARMH3	10	101345599	102556193	994.408	0.514117	964.399	0.526364	0.938402	0.694589	4.958e-21	0.444126	962859	0.641626	0.137983	0.148561
ARMH4	14	57499735	58798139	6281.53	0.109419	6363.68	0.106647	15.7397	0.592485	1.23945e-20	0.918371	1.10841e+06	0.520582	4.09505	1.36644
ARMS2	10	121954653	122957352	9883.56	0.0505576	9968.09	0.0497334	27.211	0.15776	3.37629e-20	0.0885302	824431	0.390031	0.620164	0.365536
ARMT1	6	150952258	151970101	2807.29	0.747191	2830.04	0.75439	13.7137	0.756986	2.25232e-20	0.677929	1.57315e+06	0.070084	0.157131	0.160012
ARNT	1	150309713	151376708	2931.86	0.720102	2927.05	0.723401	11.1623	0.632661	5.42761e-21	0.808881	783524	0.137062	0.602396	0.358858
ARNT2	15	79904350	81097933	9917.45	0.0649408	9949.68	0.0605793	17.6304	0.952549	2.23634e-20	0.797686	894866	0.115006	1.12944	0.540765
ARPC1A	7	98825898	99866262	8055.96	0.0106889	8016.28	0.0111439	4.93078	0.72825	5.79738e-21	0.401534	2.13667e+06	0.0208435	0.286973	0.227556
ARPC1B	7	98874249	99894816	7012.17	0.00474813	7034.47	0.00581264	3.53769	0.700208	5.48294e-21	0.317529	1.02416e+06	0.788158	0.0802602	0.10961
ARPC2	2	217717141	218754356	2833.85	0.777419	2828.05	0.768687	22.3233	0.265745	1.12725e-20	0.345756	1.42295e+06	0.0624861	5.62462	1.75178
ARPC3	12	109934823	110950422	462.938	0.788958	447.056	0.775965	1.00871	0.762179	3.52568e-21	0.443469	1.38974e+06	0.0530144	0.832175	0.441718
ARPC4	3	9292495	10307101	4949.29	0.155531	5032.45	0.143362	17.2953	0.878052	2.93674e-20	0.301548	156111	0.247586	0.0219357	0.0544042
ARPC4-TTLL3	3	9293082	10335401	4951.96	0.17105	5034.72	0.155631	17.3113	0.892589	2.93731e-20	0.310409	1.79917e+06	0.00286364	0.171867	0.168477
ARPC5	1	183120846	184135783	4738.49	0.0301307	4435.77	0.0396366	15.1958	0.308734	1.43528e-20	0.317567	2.47642e+06	0.166729	0.106761	0.128507
ARPC5L	9	124362130	125377733	2609.36	0.0276916	2594.42	0.0228555	12.9059	0.0449683	1.16856e-20	0.0459362	2.5175e+06	0.160223	7.80981	2.2843
ARPIN	15	89395006	90412952	5941.17	0.0377466	6014.18	0.0339635	14.0479	0.279876	2.33796e-20	0.105467	298185	0.0950176	0.99033	0.495309
ARPIN-AP3S2	15	89334308	90412882	6121.51	0.0423606	6181.83	0.0383241	14.304	0.279478	2.38814e-20	0.148513	1.41863e+06	0.00641095	2.4654	0.934128
ARPP19	15	52047045	53069883	12506.3	0.00182682	11995.7	0.00178894	38.4019	0.0983397	4.87149e-20	0.0133947	794364	0.060851	0.645848	0.375098
ARPP21	3	35138945	36294496	4057.86	0.493047	4192.08	0.496129	20.9935	0.146484	1.98162e-20	0.400847	861192	0.0575757	0.0772224	0.107295
ARRB1	11	74760122	75851705	1650.77	0.887441	1723.17	0.88937	7.44435	0.972593	1.08293e-20	0.818639	1.46819e+06	0.106716	2.29679	0.887254
ARRB2	17	4210596	5221499	14081.2	0.00726027	14228.7	0.0080377	20.1654	0.910878	3.20783e-20	0.526297	1.98961e+06	0.0569945	0.580128	0.35041
ARRDC1	9	137105685	138115360	6629.76	0.237527	7022.55	0.2146	15.3835	0.751355	1.86767e-20	0.444371	1.46654e+06	0.132266	1.57716	0.6795
ARRDC2	19	17501132	18514102	8928.32	0.0681556	8348.31	0.0850157	33.2146	0.0200456	4.96519e-20	0.0236876	1.84697e+06	0.0404905	0.135088	0.14678
ARRDC3	5	90868631	91883317	3596.28	0.137516	3825.29	0.124391	14.593	0.435694	1.75781e-20	0.25888	557572	0.502952	0.0563731	0.0902713
ARRDC4	15	97460703	98473833	11659.1	0.0964767	11771.1	0.103356	25.1559	0.885025	5.15875e-20	0.118739	1.01324e+06	0.572583	0.00971352	0.0355094
ARRDC5	19	4390437	5402896	6685.16	0.263194	6831.35	0.244614	64.9435	0.170071	3.09071e-20	0.514537	692625	0.389841	1.21754	0.568888
ARSA	22	50122754	51128173	3263.04	0.388747	3640.98	0.353766	38.5706	0.291982	2.20406e-20	0.387686	680658	0.50414	0.0406639	0.0756235
ARSB	5	78277209	79486087	5675.92	0.192275	5556.5	0.223806	24.5849	0.263075	2.87369e-20	0.390192	1.94538e+06	0.0837506	0.261439	0.215288
ARSG	17	67759182	68922731	6383.21	0.017363	6836.38	0.011755	20.8012	0.192459	3.57212e-20	0.083443	1.94478e+06	0.011367	0.620455	0.365645
ARSI	5	149796343	150839307	3429.56	0.666935	3628.44	0.613322	12.4688	0.507596	1.25616e-20	0.487113	2.31531e+06	0.0254887	1.06878	0.521113
ARSJ	4	113400284	114479727	5054.45	0.0905361	5089.44	0.0909447	23.8421	0.07507	1.63123e-20	0.208769	1.71342e+06	0.162149	0.535631	0.333249
ARSK	5	95055101	96105102	2425.64	0.412653	2536.85	0.392441	10.3899	0.44553	9.89286e-21	0.855826	1.54497e+06	0.0123136	0.430688	0.291026
ART1	11	3145128	4164416	8476.37	0.556442	8530.5	0.546881	15.2038	0.962649	3.06182e-20	0.682701	821188	0.493582	5.08155	1.61651
ART3	4	75511184	76614048	3891.07	0.264349	3961.17	0.253676	8.80386	0.431545	1.81081e-20	0.247143	1.01329e+06	0.573857	5.39998	1.69601
ART4	12	14325569	15343526	1834.11	0.624936	1862.86	0.627163	4.47411	0.532676	1.6433e-20	0.0708836	1.63551e+06	0.825544	0.124909	0.140399
ART5	11	3138512	4142316	5959.28	0.889985	5979.03	0.889138	15.0312	0.962493	2.92571e-20	0.748766	1.94772e+06	0.0162605	0.138263	0.148733
ARTN	1	43433320	44437240	4115	0.0818749	4738.18	0.0621997	38.3329	0.0819611	7.17772e-21	0.645013	802605	0.825786	5.38928	1.69334
ARV1	1	230478981	231500733	6775.3	0.301595	7128.2	0.283859	21.4211	0.735244	2.1813e-20	0.588782	1.63406e+06	0.799877	0.0313986	0.0658279
ARVCF	22	19469896	20516823	5773.03	0.63704	5760.37	0.677872	23.7722	0.879927	2.56708e-20	0.875627	1.45534e+06	0.414129	4.34057	1.42929
AS3MT	10	102369470	103401899	1349.76	0.674938	1297.58	0.693724	7.80251	0.219597	4.41185e-21	0.384328	23983.1	0.861115	0.917895	0.471047
ASAH1	8	17555992	18584998	12847.4	0.153442	12861.5	0.152483	37.0526	0.54669	4.05528e-20	0.254926	2.65559e+06	0.0112626	3.6824	1.25972
ASAH2	10	49682778	50779720	14396	9.00151e-05	14189.2	0.000165967	21.4475	0.440916	1.57637e-20	0.12896	1.04014e+06	0.246308	0.555988	0.341148
ASAH2B	10	50239318	51316495	2892.43	0.487887	2992.19	0.505697	10.8569	0.658224	1.28615e-20	0.333164	981774	0.577136	0.0909433	0.117486
ASAP1	8	129552104	130943674	2688.06	0.702622	2953.06	0.650886	21.2873	0.471737	2.10082e-20	0.566796	2.38519e+06	0.00291834	6.02456	1.85053
ASAP2	2	8706765	9905683	5569.71	0.187116	5831.03	0.161454	31.2704	0.031426	2.84108e-20	0.14042	2.11402e+06	0.0129379	1.64397	0.699446
ASAP3	1	22928563	23984568	4248.87	0.273053	4495.59	0.25071	12.2244	0.543826	9.21571e-21	0.803115	1.11482e+06	0.875421	0.592271	0.355028
ASB1	2	237926742	238952250	2090.86	0.828331	2189.25	0.807979	24.1354	0.204368	2.53071e-20	0.484133	2.23177e+06	0.244925	0.580177	0.350429
ASB10	7	150675698	151687832	5278.77	0.23368	5155.96	0.248048	22.8393	0.545658	1.66224e-20	0.91273	1.64582e+06	0.23297	0.730892	0.406056
ASB13	10	5138867	6166595	15271.7	0.0258914	15750.1	0.020431	45.9135	0.339214	4.27045e-20	0.537438	87027.6	0.565722	0.0159458	0.0459926
ASB14	3	56768342	57792685	3743.12	0.521359	3825.89	0.509041	16.572	0.691097	2.23188e-20	0.413389	1.13523e+06	0.0653512	2.05525	0.819066
ASB15	7	123067010	124139481	1875.8	0.215584	1785.76	0.225129	10.6312	0.181162	1.54034e-20	0.0560348	1.67229e+06	0.194926	2.9881	1.07635
ASB16	17	43670447	44679084	2451.83	0.604406	2571.64	0.599096	7.74523	0.900272	1.31936e-20	0.401713	1.29201e+06	0.0191756	2.82579	1.03263
ASB17	1	75418873	76432404	4182.36	0.408378	4178.2	0.434689	35.0173	0.051469	2.30933e-20	0.347979	1.08504e+06	0.0457746	0.858681	0.450864
ASB18	2	235693459	236764409	1325.37	0.76491	1360.05	0.771814	5.97341	0.677938	7.84421e-21	0.515861	1.29279e+06	0.629953	0.0880073	0.11536
ASB2	14	93434166	94476739	28185.6	1.05305e-08	28172.9	1.47923e-08	20.8961	0.742068	2.31233e-20	0.600947	1.73431e+06	0.0245479	0.754276	0.414398
ASB3	2	53032672	54360160	1230.31	0.960039	1271.48	0.957385	8.55526	0.940684	1.39651e-20	0.753518	87663.1	0.221683	0.0706124	0.102127
ASB4	7	94978444	96040233	2283.11	0.635767	2276.75	0.647217	4.22135	0.991193	3.01791e-21	0.999121	925197	0.248232	1.43843	0.637531
ASB5	4	175713673	176777571	10607.2	0.117758	10403	0.136658	52.033	0.409524	4.39387e-20	0.0573747	3.14321e+06	0.0134486	0.714186	0.400054
ASB6	9	129134604	130142169	10636.4	0.15422	10801.8	0.144601	35.6302	0.369756	3.77389e-20	0.324381	1.03409e+06	0.55842	0.123459	0.139475
ASB7	15	100102589	101151701	13975.8	0.0501928	14298.8	0.047488	58.8977	0.101396	4.47614e-20	0.324989	539233	0.0641972	2.74383	1.01041
ASB8	12	47647789	48681213	1808.49	0.605194	1844.83	0.640025	17.3473	0.718019	1.86266e-20	0.387936	851808	0.758435	0.574884	0.348407
ASCC1	10	71596032	72717134	3252.81	0.193183	3310.82	0.190854	3.30797	0.834654	1.90632e-20	0.158919	1.0647e+06	0.00426295	0.928762	0.474716
ASCC2	22	29288609	30338304	1253.87	0.832119	1262.97	0.825793	2.67669	0.948704	8.62813e-21	0.660796	964645	0.392021	0.0270069	0.0607478
ASCC3	6	100008194	101381372	1947.25	0.866935	1996.86	0.859259	8.29582	0.726894	8.49605e-21	0.628906	1.96143e+06	0.0233517	0.170761	0.167851
ASCL1	12	102457674	103460513	1071.68	0.721796	1063.1	0.750114	5.42741	0.820654	5.14005e-21	0.931909	2.94274e+06	0.00635304	2.39377	0.914284
ASCL2	11	1768498	2770588	6791.84	0.653704	7023.14	0.625704	23.8271	0.853654	2.82179e-20	0.839179	1.22817e+06	0.0114547	6.31314	1.92138
ASCL3	11	8437578	9443016	3124.11	0.201814	3052.62	0.207397	9.78034	0.655305	1.0116e-20	0.849019	767680	0.427164	3.3122	1.16262
ASCL4	12	107274704	108276644	3427.94	0.469199	3400.67	0.489234	10.0965	0.890409	8.98823e-21	0.844735	2.08871e+06	0.00986339	4.15951	1.38298
ASCL5	1	200613943	201627184	6163.18	0.604201	6359.73	0.598421	23.562	0.591749	2.70561e-20	0.429805	1.28572e+06	0.282373	0.352658	0.257579
ASDURF	2	189161452	190166437	3946.49	0.476992	4069.98	0.448552	10.6744	0.724924	8.46659e-21	0.660189	1.14815e+06	0.168427	0.742322	0.410142
ASF1A	6	118394152	119409171	2310.46	0.714261	2354.83	0.714746	3.92809	0.860214	6.0613e-21	0.762213	191496	0.496142	0.813406	0.435198
ASF1B	19	13619512	14636613	4101.2	0.581439	4008.14	0.573544	21.5861	0.767889	1.75915e-20	0.560218	190772	0.956282	3.20667	1.13467
ASGR1	17	6673431	7679564	5275.15	0.505681	5325.56	0.497503	44.8868	0.126324	2.02179e-20	0.533129	1.45413e+06	0.0458436	0.288453	0.228256
ASGR2	17	6601322	7615700	5685.4	0.513863	5624.29	0.510707	22.973	0.476142	1.79779e-20	0.587956	1.16371e+06	0.448885	3.71912	1.26928
ASH1L	1	154835268	156063162	2191.5	0.800501	2113.55	0.818439	5.71454	0.74205	1.10855e-20	0.494289	1.34738e+06	0.46304	1.99617	0.802175
ASH2L	8	37605493	38644076	3433.72	0.290405	3566.17	0.274535	59.5979	0.00673419	1.79978e-20	0.202112	1.38182e+06	0.459351	0.0118958	0.0394585
ASIC1	12	49557548	50583611	6670.69	0.0118064	6727.95	0.013742	13.1514	0.636147	1.15023e-20	0.645011	626192	0.183339	0.306659	0.236768
ASIC2	17	32513087	34674964	9385.34	0.712761	9390.88	0.751021	36.3218	0.889568	4.44628e-20	0.929744	2.37372e+06	0.010618	1.0007	0.498748
ASIC3	7	150548292	151552756	4392.18	0.1983	4424.53	0.19866	14.5019	0.726443	1.46642e-20	0.929929	2.00262e+06	0.0084165	1.18073	0.557195
ASIC4	2	219014170	220038772	4599.29	0.426894	4947.54	0.35518	39.2063	0.0815831	1.54711e-20	0.615187	3.1957e+06	0.0703931	0.801128	0.430911
ASIC5	4	155329729	156366277	6916.26	0.0688991	6910.21	0.0644541	15.2115	0.817969	2.56496e-20	0.291322	1.72319e+06	0.0253296	6.34303	1.92869
ASIP	20	33694569	34769344	837.936	0.828747	911.228	0.810526	5.29248	0.619351	2.45634e-21	0.878394	222535	0.0978083	0.582578	0.351344
ASL	7	65575800	66594697	2937.23	0.133705	2981.73	0.127597	3.16183	0.486536	7.53162e-21	0.391831	618627	0.0973259	0.139451	0.14946
ASNS	7	97351677	98372542	3999.64	0.115364	3987.04	0.11926	11.0762	0.303023	1.84819e-20	0.115266	2.23446e+06	0.00545617	2.46411	0.933773
ASNSD1	2	189161385	190170831	3946.49	0.476992	4069.98	0.448552	10.6744	0.724924	8.46659e-21	0.660189	1.48898e+06	0.0612315	5.07247	1.61424
ASPA	17	2972374	4003405	5379.88	0.865242	5549.81	0.871528	26.2638	0.642281	2.31604e-20	0.742595	743549	0.177713	0.26384	0.216458
ASPDH	19	50011600	51014690	11087.8	0.0580394	11030.8	0.0635651	43.2836	0.724632	3.02123e-20	0.870652	190772	0.956287	0.16726	0.16586
ASPG	14	103585686	104615582	2348.5	0.751466	2753.37	0.66019	41.5331	0.0614995	2.93643e-20	0.0228851	1.55971e+06	0.841687	0.10927	0.130196
ASPH	8	61000556	62214640	2453.11	0.361764	2572.66	0.306719	17.0383	0.286722	2.39128e-20	0.109729	2.00067e+06	0.00265298	0.0210694	0.0532579
ASPHD1	16	29400375	30419864	6831	0.00260618	6692.78	0.00294316	3.62644	0.510422	9.46275e-21	0.305781	1.13456e+06	0.0884748	0.27711	0.222862
ASPHD2	22	25929260	26945015	6479.75	0.208187	6893.94	0.159671	28.7864	0.207164	2.30378e-20	0.85204	2.10312e+06	0.00478545	0.578954	0.349962
ASPM	1	196584121	197646694	3709.72	0.274141	3700.74	0.26921	4.57706	0.874724	8.49356e-21	0.705083	2.80201e+06	0.008158	0.578954	0.349962
ASPN	9	91956205	92982506	981.737	0.695887	1101.28	0.688792	8.4142	0.613174	3.5175e-21	0.604604	1.95229e+06	0.170753	0.662597	0.381278
ASPRV1	2	69460089	70461631	607.287	0.76734	602.96	0.784061	1.32945	0.91336	2.00444e-21	0.944904	311858	0.115845	0.140687	0.150213
ASPSCR1	17	81476807	82517406	8012.84	0.0299151	7474.67	0.0474265	34.7318	0.0515148	2.66217e-20	0.0329261	492278	0.730525	0.97304	0.489558
ASRGL1	11	61837448	62893412	28874.5	8.90445e-08	30057.8	7.92684e-08	45.5594	0.0182894	3.01621e-20	0.124707	1.73229e+06	0.206655	1.06801	0.520864
ASS1	9	129944961	131001274	4997.26	0.735885	5320.22	0.718691	23.6416	0.676531	4.5678e-20	0.162246	1.39811e+06	0.275179	0.894297	0.463043
ASTE1	3	130513875	131527649	1383.78	0.864037	1407.76	0.861228	8.47927	0.197734	9.10392e-21	0.448876	1.30825e+06	0.0326915	0.00887558	0.0338854
ASTL	2	95622818	96638502	570.301	0.309047	660.839	0.300683	4.02595	0.255936	2.90643e-21	0.41541	805974	0.8322	0.358259	0.260052
ASTN1	1	176357302	177664973	3315.16	0.336841	3245.82	0.363214	20.4145	0.0764988	8.52096e-21	0.409769	1.21398e+06	0.102825	0.732585	0.406662
ASTN2	9	115923112	117915070	9392.08	0.288146	9260.08	0.322217	56.1523	0.776206	4.48984e-20	0.62277	1.14201e+06	0.201731	0.745625	0.41132
ASXL1	20	31858330	32939319	1960.62	0.321837	1882.46	0.323958	4.032	0.858793	7.87808e-21	0.386153	789836	0.227532	0.00283088	0.0188305
ASXL2	2	25233753	26378487	4478.32	0.00995343	4579.75	0.00949986	11.0547	0.880712	2.88099e-20	0.0147447	2.36477e+06	0.114919	3.63417	1.24715
ASXL3	18	33078219	34251195	4063.64	0.0297897	3877.6	0.027873	16.1296	0.113466	3.02056e-20	0.00742702	1.25209e+06	0.51293	0.368762	0.264657
ASZ1	7	116863222	117928123	710.86	0.877959	778.779	0.859767	7.7307	0.568222	3.54122e-21	0.853405	2.09876e+06	0.0336319	0.312607	0.239514
ATAD1	10	87251512	88341361	2433.77	0.701968	2503.17	0.709637	11.5422	0.886569	1.38839e-20	0.844579	1.52317e+06	0.136673	1.79758	0.744714
ATAD2	8	122819850	123916350	7652.13	0.171843	7961	0.155585	18.2121	0.842271	1.57325e-20	0.81581	1.09031e+06	0.280462	0.399277	0.277808
ATAD2B	2	23248664	24427123	1666.95	0.955555	1844.81	0.938315	10.8054	0.903569	1.05007e-20	0.915491	2.95626e+06	0.0374146	11.4489	3.14547
ATAD3A	1	1012162	2034685	13402.4	0.0353821	13819	0.031702	24.5718	0.303114	2.02953e-20	0.630236	1.15557e+06	0.142475	0.137167	0.148061
ATAD3B	1	971765	1997848	13480	0.0392471	13890.1	0.0353393	23.1155	0.356999	1.96488e-20	0.723591	2.10826e+06	0.123541	0.366671	0.263744
ATAD3C	1	949689	1970163	12632.9	0.0482713	13067.1	0.0430598	22.3664	0.371545	1.94243e-20	0.74844	2.19946e+06	0.0109065	1.3091	0.597638
ATAD5	17	30331966	31395869	2004.2	0.226481	1979.19	0.230781	7.24836	0.424481	6.02919e-21	0.535496	2.20714e+06	0.0109214	4.28185	1.4143
ATAT1	6	30126842	31146823	1021.35	0.919383	1052.21	0.914128	5.50624	0.942836	8.88878e-21	0.811108	2.24684e+06	0.00943841	0.834558	0.442543
ATCAY	19	3379864	4428082	6657.3	0.806407	6600.89	0.833227	17.8266	0.843554	2.09762e-20	0.696459	1.47136e+06	0.0620842	0.834558	0.442543
ATE1	10	121209393	122428801	18285.3	0.00275131	17990.1	0.00337844	58.78	0.0105092	5.17945e-20	0.102332	1.16445e+06	0.307957	0.943609	0.479711
ATF1	12	50263710	51321162	5708.72	0.0688693	5600.36	0.0787498	9.25005	0.54235	1.32528e-20	0.436864	1.48735e+06	0.836679	0.00593224	0.0275163
ATF2	2	174572250	175668382	2147.39	0.890131	2210.38	0.890508	5.56742	0.844117	4.69942e-21	0.929327	1.25387e+06	0.0973833	2.63687	0.981262
ATF3	1	212065334	213120777	2474.55	0.934642	2413.74	0.935444	31.509	0.123471	2.47635e-20	0.0240145	2.10694e+06	0.0125369	0.0221396	0.0546711
ATF4	22	39019695	40022683	1291.15	0.960029	1270	0.968597	5.5374	0.98773	6.93581e-21	0.880774	260156	0.809222	0.189445	0.178238
ATF5	19	49428702	50433935	12324.9	0.026035	12555.1	0.022556	66.6971	0.0180337	2.08837e-20	0.426023	130145	0.61144	0.580082	0.350393
ATF6	1	161266298	162477574	11050.1	0.153912	11350.4	0.153198	48.6694	0.00895443	4.89385e-20	0.0141955	2.04976e+06	0.0515091	3.6458	1.25018
ATF6B	6	31615264	32628253	6006.38	0.0276859	6038.25	0.0373775	43.0844	0.333809	6.02201e-20	0.140156	1.5501e+06	0.048799	0.0478155	0.0825422
ATF7	12	53007856	54126410	6150.51	0.0675209	6362.58	0.055626	21.5455	0.0376466	1.71504e-20	0.261234	689820	0.210293	0.118261	0.136125
ATF7-NPFF	12	53006691	54125979	6192.22	0.0683828	6418.95	0.0568548	22.6479	0.0521478	1.74334e-20	0.263623	1.169e+06	0.20183	1.00665	0.500715
ATF7IP	12	13865676	15002931	5623.59	0.393021	5759.6	0.377827	21.9443	0.316742	2.39279e-20	0.0705459	2.44005e+06	0.0279098	1.00665	0.500715
ATF7IP2	16	9826434	10983638	9203.79	0.459909	9504.6	0.426115	41.6568	0.350551	3.94978e-20	0.281114	2.43347e+06	0.0276919	0.15027	0.155972
ATG10	5	81472023	82776857	4643.06	0.245609	4405.78	0.288399	13.0377	0.689344	2.48414e-20	0.351542	1.21523e+06	0.396745	0.0426297	0.0775735
ATG101	12	51569246	52577495	2640.08	0.748451	2586.73	0.78076	14.2718	0.930206	1.94537e-20	0.60706	2.27637e+06	0.0179273	0.0158861	0.0459022
ATG12	5	115328200	116341837	3580.94	0.846521	3454.81	0.868925	13.5684	0.498191	1.39274e-20	0.896978	1.7136e+06	0.321598	0.129749	0.143457
ATG13	11	46117527	47174818	9584.48	7.13372e-05	10107.2	6.5311e-05	16.0152	0.249364	5.9335e-21	0.268081	1.14309e+06	0.185553	0.327433	0.246283
ATG14	14	54866391	55911830	2065.64	0.317698	2109.28	0.339378	10.7678	0.453698	1.00772e-20	0.434451	621785	0.464336	0.321905	0.243771
ATG16L1	2	232710051	233795674	2822.76	0.741084	2747.02	0.755106	25.0328	0.625	1.29841e-20	0.882307	989171	0.220814	0.130116	0.143687
ATG16L2	11	72314406	73343674	13085.9	0.000854318	12923	0.00102252	20.4739	0.113943	9.57773e-21	0.608548	1.71925e+06	0.286464	1.76763e-05	0.00145931
ATG2A	11	64394546	65417209	2855.26	0.28221	2781.7	0.283677	5.34751	0.779803	9.85681e-21	0.68159	131255	0.772642	1.15673	0.549527
ATG2B	14	95779195	96863341	2797.51	0.840699	2992.96	0.799937	54.772	0.110775	2.30425e-20	0.454749	2.13372e+06	0.0206222	2.40748	0.91809
ATG3	3	112032510	113062046	9902.8	0.136968	10283.7	0.099918	26.7638	0.267011	3.88974e-20	0.00545305	2.32379e+06	0.048415	0.869707	0.454648
ATG4B	2	241137213	242173857	1985.75	0.54135	2094.21	0.519169	9.29048	0.736301	4.89453e-21	0.987756	1.12136e+06	0.257428	0.0164621	0.0467682
ATG4C	1	62284132	63365516	8167.19	0.0809597	8062.66	0.0818881	21.6926	0.700283	1.62863e-20	0.817877	1.21042e+06	0.24074	0.879947	0.458151
ATG4D	19	10043895	11053418	5664.75	0.223528	5189.68	0.293263	30.0032	0.0250268	7.62691e-21	0.727268	38447.8	0.950956	0.314636	0.240446
ATG5	6	105545423	106825791	6768.88	0.168078	6943.13	0.146965	56.2651	0.120022	3.02277e-20	0.233892	1.52032e+06	0.117545	0.675405	0.385975
ATG7	3	10772309	12057665	3086.91	0.876086	3041.21	0.910456	27.6424	0.730533	3.6877e-20	0.22459	2.13989e+06	0.0135561	1.18915	0.559875
ATG9A	2	218719380	219729717	3986.6	0.315946	4320.58	0.24078	35.6361	0.0174031	1.32758e-20	0.224179	1.44388e+06	0.395138	2.66235	0.988223
ATG9B	7	150512209	151524499	4413.54	0.209356	4448.04	0.21103	14.5533	0.734802	1.47963e-20	0.937731	1.64004e+06	0.224809	2.3027	0.888908
ATIC	2	214811956	215849773	14231.4	0.0122144	14211.8	0.012501	35.7277	0.425785	2.51648e-20	0.164974	249920	0.0227411	0.578793	0.349901
ATL1	14	50032509	51134017	4558.43	0.447668	4665.46	0.425703	24.3073	0.634728	2.07888e-20	0.70948	1.74606e+06	0.0247951	0.11632	0.13486
ATL2	2	37793954	38877285	4349.16	0.200612	4729.21	0.183632	26.9608	0.0852093	1.78524e-20	0.214317	231703	0.0158009	0.472643	0.308234
ATL3	11	63124087	64171921	6411.6	0.0124027	6612.36	0.0100879	18.0757	0.0996533	8.51343e-21	0.265555	2.06545e+06	0.0123926	0.539845	0.334891
ATM	11	107723044	108869102	2083.32	0.63553	2022.96	0.641271	3.91022	0.963487	8.15904e-21	0.67481	2.48362e+06	0.00761361	1.23183	0.573405
ATMIN	16	80535842	81547350	8646.67	0.287293	8818.67	0.277578	46.1587	0.188707	2.76955e-20	0.422587	1.41559e+06	0.270319	0.0619479	0.0950448
ATN1	12	6424463	7442321	10323.9	0.0730651	10419.7	0.0795764	34.1307	0.419307	3.30305e-20	0.274075	1.26967e+06	0.127841	0.0126523	0.0407483
ATOH1	4	93328753	94330964	2461.1	0.483134	2511.83	0.503073	2.72923	0.883177	1.51563e-20	0.242253	998093	0.635509	0.170336	0.167611
ATOH7	10	67730595	68732113	15004.3	2.49199e-05	15880.4	1.84344e-05	42.4221	0.0246559	4.28678e-20	0.00606076	1.20743e+06	0.584399	1.78107	0.739886
ATOH8	2	85251344	86291383	2212.8	0.638523	2187.07	0.661495	6.15761	0.728644	1.48063e-20	0.302891	780874	0.34079	0.15707	0.159976
ATOSA	15	52081317	53209817	12292	0.00506066	11733	0.00530074	36.0244	0.151155	3.86054e-20	0.0652904	1.31607e+06	0.263015	0.00230322	0.0169501
ATOSB	9	34604112	35616341	5096.8	0.0467393	4713.62	0.059014	13.3162	0.251495	1.03179e-20	0.818757	1.50172e+06	0.04878	0.621683	0.366105
ATOX1	5	151242316	152272532	3102.29	0.0774791	3127.33	0.079079	4.12261	0.889081	9.69695e-21	0.79816	1.60557e+06	0.107353	1.67441	0.708477
ATP10A	15	25177273	26365184	11765.5	0.200181	12170.6	0.181637	37.2103	0.562637	3.12486e-20	0.424839	1.46848e+06	0.166773	1.48157	0.650667
ATP10B	5	160063120	161352214	4286.37	0.696813	4255.6	0.681895	14.6907	0.476379	2.82571e-20	0.317752	449432	0.211884	0.25153	0.210419
ATP10D	4	46985275	48093486	5096.84	0.188914	5220.67	0.168584	14.2017	0.579149	1.76763e-20	0.598546	2.08726e+06	0.0409082	0.190756	0.178953
ATP11A	13	112190038	113387168	13236.4	0.0386769	13534.2	0.0380306	31.0431	0.701416	2.71936e-20	0.881686	397302	0.40879	0.640217	0.373011
ATP11B	3	182293503	183421629	2608.24	0.839156	2565.76	0.860345	12.6923	0.617432	9.56163e-21	0.931336	1.10137e+06	0.146651	3.87301	1.3092
ATP12A	13	24180408	25212472	26092.1	2.76433e-05	25872.1	3.77535e-05	51.0177	0.25249	4.73232e-20	0.154496	1.33572e+06	0.256149	1.02204	0.505796
ATP13A1	19	19145198	20163676	1823.47	0.698131	1904.51	0.701573	5.05093	0.915016	4.32081e-21	0.845297	361567	0.423745	1.44621	0.639906
ATP13A2	1	16485958	17511928	10235.3	0.0680278	10346	0.0624214	48.1235	0.201305	7.8011e-20	0.000115065	1.26551e+06	0.390586	0.281051	0.224744
ATP13A3	3	193902672	194998364	5176.18	0.908279	5155.43	0.925662	43.4963	0.829361	3.28797e-20	0.93325	2.72091e+06	0.0157637	0.00824741	0.0326208
ATP13A4	3	192898967	194093111	3327.52	0.342537	3172.62	0.38086	34.8182	0.528822	4.22789e-20	0.0775691	1.70227e+06	0.145477	3.82993	1.29804
ATP13A5	3	192774789	193878820	2699.98	0.503769	2577.77	0.546893	26.6445	0.568493	2.36848e-20	0.268391	430580	0.13768	1.59656	0.685309
ATP1A1	1	115872668	116910261	5336.49	0.00449327	4844.77	0.0108266	24.6018	0.0694285	1.33891e-20	0.330679	206561	0.409574	1.08697	0.527035
ATP1A2	1	159615759	160643591	4947.95	0.441697	5200.9	0.432324	17.2181	0.473249	2.79811e-20	0.251533	180942	0.434062	2.07462	0.824584
ATP1A3	19	41466582	42497497	691.648	0.71636	721.549	0.699516	4.08524	0.66655	8.22288e-21	0.413938	1.34286e+06	0.125885	0.25218	0.210741
ATP1A4	1	159651586	160686980	4954.57	0.444677	5211.12	0.436731	17.6072	0.515723	2.80549e-20	0.25696	365714	0.646562	0.192872	0.180103
ATP1B1	1	168605697	169810992	2331.22	0.6529	2390.31	0.652988	8.37355	0.69282	1.81854e-20	0.361974	1.57565e+06	0.038297	3.13944	1.11679
ATP1B2	17	7146627	8157770	9178.89	0.0413109	9077.17	0.0440749	50.2715	0.10827	2.47761e-20	0.227662	379627	0.626584	3.13944	1.11679
ATP1B3	3	141376124	142426549	6586.38	0.154776	6743	0.135506	43.8758	0.0034308	2.31963e-20	0.0341338	396200	0.849945	0.73827	0.408695
ATP23	12	57406039	58459148	2335.49	0.371658	2488.23	0.363991	10.8375	0.489903	1.10641e-20	0.61947	1.38901e+06	0.304232	0.0015148	0.0136969
ATP2A1	16	28378405	29404466	2958	0.046367	3427.45	0.0256868	32.6431	0.0711857	2.66813e-20	0.00445926	470948	0.858431	1.51337	0.660298
ATP2A2	12	109780756	110851093	523.225	0.587279	514.295	0.575019	0.416321	0.70903	3.01614e-21	0.367832	1.45801e+06	0.0329995	0.00208192	0.0161002
ATP2A3	17	3423870	4464464	8170.7	0.4273	8137.11	0.465504	32.987	0.565785	3.15297e-20	0.248779	1.55107e+06	0.201775	0.0242875	0.0574187
ATP2B1	12	89088049	90209366	37308.4	3.6127e-16	35111.9	2.48749e-15	92.8213	2.77066e-07	4.15947e-20	0.00109478	1.15745e+06	0.00116778	0.99027	0.49529
ATP2B2	3	9824023	11208007	5420.57	0.657052	5553.28	0.652677	41.4644	0.719229	5.1353e-20	0.0966141	1.60608e+06	0.687799	0.402671	0.279251
ATP2B4	1	203126832	204244081	6086.19	0.686835	6373.42	0.644579	37.3639	0.373676	3.12326e-20	0.473269	1.51851e+06	0.0675157	0.186458	0.176603
ATP2C1	3	130350595	131516712	1858.6	0.574887	1924.46	0.56362	8.62035	0.170356	1.06665e-20	0.523202	2.38618e+06	0.0331357	0.00240537	0.0173291
ATP2C2	16	83868527	84964187	19246.9	0.221162	18504.5	0.295564	84.584	0.665691	7.92425e-20	0.448758	690885	0.0933396	0.0326419	0.0672087
ATP4A	19	35050031	36063658	10564.1	0.00398387	10969.8	0.00312044	37.2425	0.0617323	2.71952e-20	0.33032	1.31978e+06	0.135416	1.31287	0.598815
ATP4B	13	113148804	114158198	4456.73	0.759542	4360.98	0.781192	20.4301	0.532372	1.7334e-20	0.25731	1.90863e+06	0.00451873	0.358869	0.260321
ATP5F1A	18	45580248	46604334	4101.02	0.702655	4024.04	0.715776	14.1231	0.83522	1.59864e-20	0.743915	1.07338e+06	0.313787	1.92094	0.780538
ATP5F1B	12	56138175	57145984	9233.28	0.00521277	9434.8	0.00521139	22.1038	0.0856969	9.48072e-21	0.438011	604242	0.802978	0.819987	0.437488
ATP5F1C	10	7288147	8307815	9474.32	0.173543	9707.77	0.163303	50.7994	0.229882	2.88106e-20	0.842065	1.13837e+06	0.231425	0.484109	0.312857
ATP5F1D	19	741746	1744825	7679.05	0.48755	7983.66	0.472559	44.4374	0.329915	4.52693e-20	0.084547	1.08716e+06	0.404462	0.819987	0.437488
ATP5F1E	20	58525475	59532345	4282.45	0.726357	4586.03	0.738987	41.1841	0.344381	3.60289e-20	0.108343	1.56204e+06	0.195039	0.484562	0.313039
ATP5IF1	1	27736109	28746906	269.188	0.9316	299.84	0.91707	3.3779	0.749501	3.5814e-21	0.490184	1.87129e+06	0.0294785	0.0393592	0.074307
ATP5MC1	17	48392765	49395871	3078.7	0.601035	3033.84	0.596786	7.85608	0.805337	1.11279e-20	0.551043	789878	0.465207	0.0393592	0.074307
ATP5MC2	12	53132726	54177408	6288.86	0.0549564	6433.65	0.0469393	13.9338	0.106115	1.84318e-20	0.159952	874958	0.497402	0.0043185	0.0233729
ATP5MC3	2	174676258	175681710	2137.77	0.891335	2197.91	0.890224	5.70667	0.872103	4.41815e-21	0.944361	1.40787e+06	0.226571	0.0393592	0.074307
ATP5ME	4	172436	1174330	5184.49	0.479555	5142.53	0.483998	24.8945	0.12038	1.19386e-20	0.741608	2.52371e+06	0.0227977	1.44399	0.639228
ATP5MF	7	98948475	99966186	6986.92	0.00225639	7005.53	0.00265509	3.40792	0.575909	5.42676e-21	0.192993	258083	0.790978	0.000150518	0.00427211
ATP5MF-PTCD1	7	98919749	99966197	6986.92	0.00225639	7005.53	0.00265509	3.40792	0.575909	5.42676e-21	0.192993	2.43315e+06	0.00142886	0.57983	0.350296
ATP5MG	11	117901346	118933278	3262.84	0.512479	3502.85	0.472147	13.7878	0.476975	2.44571e-20	0.0814357	1.3153e+06	0.0628093	2.92575	1.0596
ATP5MGL	22	42139803	43140601	7201.1	0.00391045	7571.44	0.00348617	56.0884	0.0547429	2.66002e-20	0.105377	1.34963e+06	0.0664525	2.85082	1.0394
ATP5MJ	14	103412288	104428269	5492.52	0.120498	5852.43	0.10084	37.8392	0.078763	1.10833e-20	0.626346	1.76277e+06	0.0671372	0.232958	0.201115
ATP5MK	10	102889041	103896492	2825.07	0.16319	2907.12	0.16162	14.1006	0.345851	1.60447e-20	0.138802	1.24003e+06	0.154914	0.0120542	0.0397316
ATP5PB	1	110948864	111962773	6330.84	0.309679	6569	0.316572	16.933	0.890498	2.02905e-20	0.759289	1.08536e+06	0.070259	0.22192	0.195465
ATP5PD	17	74538863	75546985	11552.8	0.00914089	11752.1	0.00778558	45.24	0.0108909	3.67376e-20	0.023008	1.4035e+06	0.0654143	3.69147	1.26208
ATP5PF	21	25216503	26235673	6477.4	0.0507182	6530.67	0.0471173	17.929	0.395271	1.06415e-20	0.480161	808517	0.687366	1.88497	0.770137
ATP5PO	21	33403453	34415814	3589.53	0.352937	3953.01	0.279851	46.0826	0.0873887	3.20725e-20	0.0838316	1.15394e+06	0.173093	0.110718	0.131163
ATP6V0A1	17	41958844	43022582	2745.26	0.684291	2862.91	0.664345	5.96942	0.63379	8.20165e-21	0.570204	1.55251e+06	0.103688	0.00591642	0.0274785
ATP6V0A2	12	123212353	124261755	8625.92	0.0189131	8614.99	0.018748	49.9432	0.0163676	4.55365e-20	0.00361173	1.85358e+06	0.00321862	0.000664774	0.00902648
ATP6V0A4	7	138206294	139299560	4056.76	0.492785	4192.89	0.470833	23.3923	0.467882	2.21216e-20	0.789591	1.19e+06	0.17146	0.0346154	0.0693546
ATP6V0B	1	43474487	44478295	4386.54	0.106394	5032.41	0.0781218	39.4837	0.0757933	1.01286e-20	0.435419	999832	0.00710946	0.166802	0.165598
ATP6V0C	16	2013952	3020218	13488.9	7.27437e-05	13222.5	7.39265e-05	31.4305	0.0586121	5.72453e-20	1.69591e-07	581568	0.424136	1.56822	0.676818
ATP6V0D1	16	66938014	67981181	11285	3.01064e-06	11167	3.05617e-06	0.324656	0.00735915	7.72641e-22	0.227388	1.43598e+06	0.420095	0.0190972	0.050567
ATP6V0D2	8	85487323	86654225	1524.65	0.518568	1499.75	0.55355	20.8666	0.246821	1.06668e-20	0.269678	1.65335e+06	0.0340496	2.81155	1.02878
ATP6V0E1	5	172483771	173535445	3736.96	0.715203	3696.97	0.734789	20.2345	0.681505	2.74721e-20	0.449796	2.17221e+06	0.101279	0.264678	0.216865
ATP6V0E2	7	149372968	150391204	20634.3	1.92786e-05	20604.5	1.82275e-05	53.8005	0.0904408	2.9475e-20	0.182416	1.53468e+06	0.137699	0.678107	0.386963
ATP6V1A	3	113246770	114312056	2670.29	0.171065	2658.21	0.151882	27.0022	0.0633271	2.70598e-20	0.0500386	208819	0.0676499	2.65092	0.985101
ATP6V1B1	2	70435900	71465431	10053.9	0.00907507	10149.5	0.00976497	19.3518	0.606348	1.71232e-20	0.550682	453115	0.165137	0.952061	0.482547
ATP6V1B2	8	19697381	20726819	2362.45	0.56801	2508.94	0.53963	18.7716	0.50866	1.52607e-20	0.778583	631387	0.881306	0.22821	0.198696
ATP6V1C1	8	102521063	103573051	4933.1	0.291673	4718.86	0.338849	31.3149	0.0719057	2.46632e-20	0.438691	2.04187e+06	0.101897	0.00492109	0.024994
ATP6V1C2	2	10221100	11285110	6673.37	0.361182	6709.77	0.366018	23.5772	0.646053	3.03103e-20	0.631859	2.44309e+06	0.0294926	1.63854	0.69783
ATP6V1D	14	66794371	67860265	7718.74	0.0262906	7754.78	0.0253517	15.2605	0.111829	1.3258e-20	0.076471	847933	0.344688	0.171867	0.168477
ATP6V1E1	22	17092136	18128749	4990.02	0.72313	5019.25	0.724217	34.9886	0.224835	3.05958e-20	0.421106	2.42378e+06	0.0206726	0.0233161	0.05619
ATP6V1E2	2	45990750	47042577	6091.98	0.31847	6135.82	0.335827	17.871	0.520322	2.31319e-20	0.644228	2.06108e+06	0.0692214	2.39996e-05	0.00170089
ATP6V1F	7	128362856	129365847	1231.67	0.943608	1174.18	0.958218	12.8144	0.576965	1.04809e-20	0.81743	1.1475e+06	0.562631	0.110578	0.131069
ATP6V1FNB	7	128366330	129372047	1231.67	0.943608	1174.18	0.958218	12.8144	0.576965	1.04809e-20	0.81743	1.14419e+06	0.162796	0.0126524	0.0407485
ATP6V1G1	9	114087706	115098915	4677.33	0.344517	4703.65	0.346925	23.2628	0.292801	4.31092e-20	0.0202405	688370	0.25633	0.533164	0.332286
ATP6V1G2	6	31044444	32048427	2378.43	0.886552	2434.24	0.897309	32.79	0.7378	4.37746e-20	0.701658	686807	0.261744	0.402414	0.279142
ATP6V1G2-DDX39B	6	31030219	32046608	2378.43	0.886552	2434.24	0.897309	32.79	0.7378	4.37746e-20	0.701658	1.28933e+06	0.0281588	1.86003	0.762907
ATP6V1G3	1	198023222	199040945	2327.16	0.297666	2409.21	0.281984	9.27618	0.189406	9.64931e-21	0.329772	1.08292e+06	0.285635	0.000222051	0.00519433
ATP6V1H	8	53215543	54343558	678.215	0.743779	702.948	0.767848	5.12518	0.868447	4.62644e-21	0.908254	1.09557e+06	0.289105	1.38314	0.620574
ATP7B	13	51430436	52512125	1216.98	0.973743	1278.78	0.97567	6.60008	0.878219	6.0639e-21	0.790782	118169	0.151725	0.00827136	0.0326698
ATP8A1	4	41908373	43157121	3180.37	0.575761	3381.11	0.543922	26.5743	0.0564325	4.0782e-20	0.0236366	2.90099e+06	0.0137333	0.0750795	0.10564
ATP8A2	13	24871974	26525851	24022.4	0.00224769	24067.7	0.00305166	79.4762	0.0861137	4.78042e-20	0.312558	1.22349e+06	0.241888	0.198659	0.183225
ATP8B1	18	57146426	58303315	6279.18	0.55788	6598.69	0.498422	37.4794	0.241821	2.30528e-20	0.679616	1.41889e+06	0.190453	0.762498	0.417314
ATP8B2	1	153825525	154851304	23561.1	4.83288e-10	25201.4	5.63337e-09	45.9686	0.0459164	2.69092e-20	0.44107	2.86507e+06	0.0486414	1.17973	0.556875
ATP8B3	19	1282075	2312276	7554.51	0.214124	7716.74	0.203155	28.1469	0.320426	3.28736e-20	0.208058	1.88832e+06	0.00921059	0.528118	0.330312
ATP8B4	15	49358238	50682817	3737.08	0.232869	3802.04	0.231844	15.8272	0.413354	2.46089e-20	0.050915	561291	0.236449	1.37374	0.617675
ATP9A	20	51096514	52268390	2811.08	0.950359	2731.53	0.957397	13.7028	0.965727	2.18804e-20	0.889256	2.3394e+06	0.00560471	0.241495	0.205423
ATP9B	18	78569285	79878287	17364.7	0.0699197	17414.9	0.0708802	34.0491	0.806917	3.82005e-20	0.67687	2.46655e+06	0.00977445	0.140604	0.150162
ATPAF1	1	46132737	47173867	7973.41	0.00930419	7900.86	0.01258	33.9801	0.0788565	2.47442e-20	0.0121405	1.10607e+06	0.545236	1.27234	0.58615
ATPAF2	17	17477409	18539209	1686.03	0.514883	1675.71	0.528561	7.38639	0.441552	1.53732e-20	0.145653	2.24497e+06	0.164042	4.41264	1.44765
ATPSCKMT	5	9725507	10749897	8763.87	0.264333	8615.71	0.30572	49.4148	0.0683059	4.66813e-20	0.105536	974029	0.203939	0.182768	0.17457
ATR	3	141949007	143078733	962.328	0.574963	976.641	0.593865	4.90626	0.592796	5.89561e-21	0.539735	1.07313e+06	0.55575	0.123888	0.139749
ATRAID	2	26712041	27717178	911.714	0.901488	915.358	0.902333	2.16756	0.916608	2.17317e-21	0.864815	2.38837e+06	0.0272156	0.29272	0.230266
ATRIP	3	47946710	48967645	322.715	0.876338	369.527	0.855863	4.27618	0.563435	2.42581e-21	0.573918	485753	0.484292	0.00723952	0.0304939
ATRN	20	2971018	4151118	6802.3	0.203034	6722.63	0.240005	51.3429	0.219144	2.84461e-20	0.538209	1.89058e+06	0.322338	0.0533851	0.0876322
ATRNL1	10	114593365	116448999	9767.5	0.0523711	9693.17	0.0518616	58.6717	0.0772957	1.94039e-20	0.193196	1.6008e+06	0.109798	2.26177	0.877449
ATXN1	6	15799112	17261491	9460.29	0.116374	9877.92	0.0936221	48.1683	0.170652	2.58293e-20	0.568455	1.90767e+06	0.834681	2.01548	0.807707
ATXN10	22	45171798	46345307	4897.2	0.640537	4947.25	0.623434	52.967	0.00881228	2.70558e-20	0.30333	1.8952e+06	0.0386918	0.204423	0.186303
ATXN1L	16	71308439	72385268	1624.21	0.362859	1726.96	0.330323	11.7449	0.28064	4.11679e-21	0.418598	2.56178e+06	0.0324123	3.5029	1.21281
ATXN2	12	110943485	112099676	448.92	0.251643	444.813	0.256649	0.205746	0.857092	8.74331e-22	0.798543	1.34372e+06	0.302226	5.56301	1.73651
ATXN2L	16	28322999	29337237	2955.39	0.0455283	3422.46	0.0247961	32.2623	0.0518574	2.6441e-20	0.0022323	1.91094e+06	0.0248466	2.0839	0.827223
ATXN3	14	91544496	92606621	6436.9	0.494633	6648.41	0.457134	44.2258	0.224555	3.01547e-20	0.453444	837650	0.759787	5.72732	1.77721
ATXN7	3	63363155	64503462	6249.33	0.331108	6478.44	0.349629	27.3377	0.70204	3.18392e-20	0.137661	1.39214e+06	0.291818	0.708133	0.39787
ATXN7L1	7	105104772	106376599	4383.89	0.910564	4512.59	0.911792	17.3924	0.845045	2.47405e-20	0.671174	581060	0.481261	5.72732	1.77721
ATXN7L2	1	108983479	109992804	6936.9	0.141009	6976.81	0.136259	20.9446	0.372709	1.84444e-20	0.40173	1.89697e+06	0.207226	1.0764	0.523596
ATXN7L3	17	43691805	44700113	2421.07	0.516627	2538.38	0.508057	7.69617	0.883243	1.31852e-20	0.396891	1.43e+06	0.242634	8.2594	2.3921
ATXN7L3B	12	74037835	75045430	2386.7	0.599694	2334.81	0.611766	8.02743	0.128437	8.77072e-21	0.248196	623796	0.205663	6.95114	2.07693
AUH	9	90713815	91861918	4027.33	0.658696	4098.26	0.691499	13.4752	0.937067	2.48555e-20	0.412139	1.27384e+06	0.602807	3.11058	1.1091
AUNIP	1	25331913	26359458	2500.59	0.371258	2460.77	0.357885	11.2182	0.449911	6.54558e-21	0.69623	1.02841e+06	0.23681	1.26117	0.582644
AUP1	2	74026645	75029760	734.301	0.976617	773.735	0.976246	6.4969	0.827129	4.52744e-21	0.936519	732878	0.449832	0.962231	0.48595
AURKA	20	55869389	56892337	6426.73	0.459204	6447.24	0.509723	22.6745	0.726393	1.96062e-20	0.977196	1.82877e+06	0.0687913	0.689922	0.39127
AURKAIP1	1	873730	1875207	15303.5	0.0158372	15542.9	0.0156154	26.6586	0.261158	2.2057e-20	0.596437	989211	0.27831	1.23183	0.573405
AURKB	17	7704733	8710600	13585.9	0.00202426	13232.9	0.00213092	12.9763	0.356862	2.48481e-20	0.175182	1.29786e+06	0.191493	0.176718	0.171206
AURKC	19	56731009	57735548	3250	0.494812	3116.54	0.552378	19.7724	0.451826	1.55573e-20	0.863435	1.89339e+06	0.0192061	1.52717	0.664467
AUTS2	7	69098296	71293506	15334.3	0.0160625	15662.5	0.0118297	39.7213	0.251581	4.20656e-20	0.0609732	1.31166e+06	0.285295	0.10189	0.125186
AVEN	15	33358782	34575155	19680.8	0.0019767	19818	0.00176932	65.0073	0.108993	4.96317e-20	0.285044	1.28242e+06	0.0180661	1.17651	0.55585
AVIL	12	57297376	58318734	2209.66	0.36614	2353.78	0.35766	10.3785	0.370233	8.96121e-21	0.581355	4.71075e+06	0.0407737	1.13679	0.54313
AVL9	7	31995426	33088726	9895.58	0.0718471	10391	0.0543006	28.5744	0.0620095	3.71583e-20	0.0774457	2.02558e+06	0.00584365	0.637811	0.372118
AVP	20	2582556	3584724	6479.53	0.0190778	6266.36	0.0300589	45.6462	0.0485239	3.4003e-20	0.037647	1.80001e+06	0.00768918	0.915515	0.470242
AVPI1	10	97177424	98187241	4080.9	0.240777	3955.1	0.221944	9.75334	0.669519	1.2683e-20	0.525896	1.34322e+06	0.399978	0.803763	0.431833
AVPR1A	12	62642759	63651201	10322.7	0.00924564	9797.11	0.0113634	50.7726	0.0179649	1.99261e-20	0.0607636	1.50775e+06	0.636961	0.0737553	0.104608
AVPR1B	1	205606936	206617699	6616.21	0.0169767	6668.45	0.019744	27.703	0.136826	1.22081e-20	0.369201	759444	0.155684	0.135066	0.146766
AXDND1	1	178865720	180054735	4349.54	0.199893	4399.79	0.209472	17.3404	0.338843	1.19191e-20	0.636674	1.25671e+06	0.209537	0.0309383	0.0653107
AXIN1	16	1	852723	1542.37	0.985473	1581.42	0.98438	18.8118	0.105944	1.2781e-20	0.312013	139158	0.428583	0.659487	0.380134
AXIN2	17	65028563	66061648	12524.5	0.0237302	12829.1	0.0194616	10.1669	0.585779	1.36924e-20	0.811797	528694	0.0309038	0.463777	0.304637
AXL	19	40719223	41761766	2445.69	0.652787	2586.22	0.632978	26.9391	0.329255	2.92858e-20	0.162422	1.85983e+06	0.00241607	0.0117344	0.0391786
AZGP1	7	99466720	100476042	4271.98	0.0142397	4247.54	0.012131	1.16605	0.731519	2.83537e-21	0.736158	1.18717e+06	0.299965	0.348734	0.255839
AZI2	3	27815003	28849050	2134.21	0.586726	2056.11	0.5987	13.6245	0.69774	1.35918e-20	0.599363	1.54862e+06	0.159194	0.931601	0.475672
AZIN1	8	102326111	103393864	3895.68	0.504448	3809.69	0.53838	27.0862	0.115307	2.28575e-20	0.527679	1.07321e+06	0.00627763	0.510033	0.323193
AZIN2	1	32581104	33623492	6715.65	0.089263	7433.21	0.0667249	27.0007	0.0112256	1.04905e-20	0.16405	950914	0.503372	3.22126	1.13854
AZU1	19	325097	1332018	11309.4	0.205208	11381	0.212522	41.9284	0.506071	5.95043e-20	0.154971	1.04042e+06	0.248028	0.673859	0.385409
B2M	15	44211358	45218851	4755.27	0.291492	4363.19	0.340412	20.4491	0.0229614	1.08049e-20	0.282725	862880	0.921096	0.028095	0.0620382
B3GALNT1	3	160583883	161605411	392.274	0.724702	384.474	0.670215	3.66756	0.756109	1.36679e-21	0.840161	2.52925e+06	0.00139065	0.211151	0.189857
B3GALNT2	1	234947190	236004452	877.777	0.994313	863.589	0.99654	8.13473	0.894647	6.92213e-21	0.968922	870638	0.736261	0.781846	0.424146
B3GALT1	2	166793001	168374045	9240.2	0.0222102	8777.7	0.0268853	55.4826	0.0209761	2.13193e-20	0.524771	381466	0.386945	4.73877	1.53032
B3GALT2	1	192678730	193686613	3662.32	0.0753402	3441.41	0.0813655	7.80247	0.260349	7.53332e-21	0.435601	31905.5	0.927528	0.685875	0.389797
B3GALT4	6	32777123	33784832	6426.17	0.0380152	6159.78	0.041923	18.4337	0.308335	3.13969e-20	0.159154	397855	0.707255	1.25502	0.580713
B3GALT5	21	39056442	40173137	4049.04	0.906093	3853.3	0.925124	30.0635	0.379735	2.38078e-20	0.793171	112570	0.404757	0.0499196	0.0844929
B3GALT6	1	732237	1735041	21018.3	0.00519045	21194.9	0.00508449	51.5966	0.0124065	3.32711e-20	0.209123	943570	0.700571	0.0374392	0.0723352
B3GALT9	9	120292403	121301787	1395.12	0.582884	1456.79	0.577894	3.69934	0.921646	1.1633e-20	0.196151	2.12163e+06	0.0498319	0.583525	0.351705
B3GAT1	11	133878504	134912242	5394.13	0.602716	5325.69	0.629953	38.22	0.281477	3.00664e-20	0.599605	1.87106e+06	0.0304636	0.118997	0.136603
B3GAT2	6	70356679	71457060	4004.54	0.343496	3941.27	0.381979	24.0397	0.115896	1.84273e-20	0.253981	1.09116e+06	0.311341	0.587403	0.35318
B3GAT3	11	62115296	63122154	11986.8	0.00228163	12454.3	0.00146956	25.359	0.221531	2.28768e-20	0.279299	860730	0.0069889	0.968116	0.487915
B3GLCT	13	30699975	31832276	15537.6	0.0136119	15275.8	0.0165714	53.8555	0.0911787	4.11654e-20	0.136554	2.05053e+06	0.108125	1.03393	0.509709
B3GNT2	2	61696115	62724731	4718.89	0.245182	4562.98	0.272965	8.18876	0.929994	1.288e-20	0.653709	1.34161e+06	0.0532901	0.835486	0.442865
B3GNT3	19	17294828	18313576	11695.7	0.0096814	11170.7	0.010308	43.2781	0.0090952	6.5098e-20	0.00316037	1.14816e+06	0.277511	0.0822287	0.111091
B3GNT4	12	121703681	122708952	2490.22	0.12037	2573.81	0.126757	11.4768	0.557074	1.06887e-20	0.58611	1.23637e+06	0.0440346	2.84954	1.03905
B3GNT5	3	182753253	183798504	2791.06	0.664299	2809.76	0.673538	10.6492	0.851237	1.54347e-20	0.714939	1.17704e+06	0.468626	1.02692	0.507401
B3GNT6	11	76534398	77541973	4379.44	0.292185	4278.22	0.309942	15.6505	0.41989	1.18052e-20	0.613728	1.06139e+06	0.0460799	1.58087	0.680611
B3GNT7	2	230895710	231901164	2224.89	0.815111	2274.06	0.817043	6.25336	0.921348	7.73834e-21	0.875114	307340	0.398008	0.00668824	0.0292719
B3GNT8	19	40925359	41928730	1139.15	0.952052	1214.26	0.946605	18.2124	0.54837	2.43713e-20	0.288446	1.51202e+06	0.0114473	0.615388	0.363747
B3GNT9	16	66648104	67650998	14027	3.32949e-07	13977.6	3.22777e-07	0.749765	0.00035775	1.73259e-21	0.078879	34040.4	0.955152	0.570327	0.346663
B3GNTL1	17	82442149	83551809	3765.68	0.253357	3699.23	0.251115	27.0077	0.404558	1.69703e-20	0.555261	1.50905e+06	0.222651	1.40188	0.626335
B4GALNT1	12	57123409	58133239	2230.33	0.403743	2331.89	0.399124	6.28289	0.690663	5.57292e-21	0.806385	2.02914e+06	0.0516756	0.146383	0.153653
B4GALNT2	17	48632460	49676840	3655.91	0.324336	3576.53	0.337926	8.6898	0.845305	1.47832e-20	0.420168	1.29383e+06	0.221282	0.0520817	0.0864618
B4GALNT3	12	1	1063509	13173.8	0.0179071	13469.8	0.0171602	50.8822	0.130144	4.85613e-20	0.0214339	1.44427e+06	0.0154594	0.195212	0.181369
B4GALNT4	11	1	882117	11670.2	0.0160834	12446.4	0.00956719	57.8724	0.00485176	4.22213e-20	0.00351473	1.46773e+06	0.16797	1.33504	0.605704
B4GALT1	9	32604082	33667356	7276.86	0.488101	7579.35	0.481161	41.6614	0.240099	5.21192e-20	0.00704246	2.26225e+06	0.00225446	0.293416	0.230593
B4GALT2	1	43478943	44491170	4386.54	0.106394	5032.41	0.0781218	39.4837	0.0757933	1.01286e-20	0.435419	1.87822e+06	0.00268363	0.00086403	0.0103055
B4GALT3	1	160671310	161677968	6285.7	0.348521	6376.07	0.34855	42.5465	0.038091	5.8881e-20	0.000701012	968679	0.84681	2.24637	0.873129
B4GALT4	3	118711732	119740946	4510.83	0.322599	4867.78	0.300406	22.6275	0.226047	1.45076e-20	0.617851	1.43516e+06	0.420434	1.07338	0.522613
B4GALT5	20	49132945	50213878	4159.28	0.0643422	4100.31	0.0688984	9.81199	0.899368	7.94559e-21	0.990657	372194	0.341928	0.641897	0.373634
B4GALT6	18	31122246	32185836	3055.79	0.388582	2999.27	0.400046	7.89594	0.934371	1.00618e-20	0.61668	1.57508e+06	0.0420402	0.682695	0.388638
B4GALT7	5	177100132	178110330	8912.24	0.0689176	8776.92	0.080335	72.6367	0.00113661	4.0331e-20	0.0121848	1.43574e+06	0.263024	0.0313543	0.0657782
B4GAT1	11	65845374	66847629	3225.2	0.174983	3068.68	0.176619	5.73965	0.561429	5.14742e-21	0.570687	1.1622e+06	0.300533	1.56985	0.677309
B9D1	17	18834308	19878193	9967.51	0.00121549	9546.41	0.00158863	19.2225	0.0974613	7.13743e-21	0.680713	324624	0.549611	2.55502	0.958827
B9D2	19	40854417	41864165	2167.4	0.63111	2256.57	0.621303	18.2601	0.546335	2.80561e-20	0.17358	1.53829e+06	0.0449536	1.94569	0.787674
BAALC	8	102640713	103730305	3858.68	0.298995	3572.38	0.370164	16.1715	0.193762	1.48217e-20	0.644778	3.06292e+06	0.0258504	0.363964	0.262558
BAAT	9	100854182	101885400	930.516	0.97794	1005.1	0.972177	12.6931	0.708222	1.62573e-20	0.403744	1.4996e+06	0.180581	2.35204	0.902677
BABAM1	19	16767376	17781249	10199.3	0.0105254	9894.44	0.00907301	59.2294	0.0380926	3.67192e-20	0.0662504	970770	0.340851	0.971614	0.489082
BABAM2	2	27389941	28838901	8502.27	0.135244	8743.65	0.117141	36.4352	0.235837	2.76556e-20	0.170383	682058	0.509528	0.00640308	0.0286212
BACE1	11	116785232	117816259	13012.4	0.00657284	12800.3	0.00590598	41.0718	0.131536	6.79436e-20	0.00162804	1.83478e+06	0.0406214	4.69165	1.51842
BACE2	21	40667801	41782530	8030.71	0.320398	8306.83	0.318026	23.8619	0.918069	2.84664e-20	0.877687	1.92476e+06	0.130181	0.000553691	0.00823051
BACH1	21	28694071	30130751	13106.9	0.00385027	13584.1	0.00336225	32.3349	0.102179	1.01373e-20	0.535374	1.08241e+06	0.101125	2.53296	0.95276
BACH2	6	89426528	90796843	9094.63	0.0323658	9179.94	0.0317824	33.8625	0.0815533	1.62211e-20	0.883634	1.58588e+06	0.167648	0.000553691	0.00823051
BAD	11	63769830	64784704	5916.24	0.00599985	6154.69	0.00604507	6.37655	0.465154	1.35673e-20	0.244169	3.68175e+06	0.005764	1.821	0.751551
BAG1	9	32747820	33764720	6036.05	0.347607	6247.81	0.344366	38.8218	0.151435	5.02711e-20	0.00651748	908536	0.173802	0.846954	0.446827
BAG2	6	56672326	57689833	3734.88	0.0553467	3299.02	0.0773694	32.31	0.00583981	2.03131e-20	0.000238303	2.28601e+06	0.0668804	0.0870134	0.114634
BAG3	10	119151380	120177819	5334.89	0.353154	5389.41	0.393969	22.5687	0.69323	2.23535e-20	0.440686	967398	0.713902	0.711079	0.398934
BAG4	8	37676533	38713301	2978.68	0.425942	3240.66	0.374848	48.8645	0.011616	1.69589e-20	0.281868	1.26703e+06	0.0223818	0.109793	0.130546
BAG5	14	103056545	104062657	8229	0.0246439	8116.26	0.0270705	47.4265	0.112154	1.84446e-20	0.396774	871161	0.165292	0.153736	0.158021
BAG6	6	31139028	32152705	1985.91	0.859365	2047.13	0.869139	30.7702	0.700194	4.19288e-20	0.663494	2.37767e+06	0.00985165	1.15889	0.550218
BAHCC1	17	80895457	81966331	10862.8	0.0741061	10969	0.0830307	95.6709	0.0905001	5.76894e-20	0.00704411	1.4252e+06	0.0631203	0.0123029	0.040157
BAHD1	15	39939721	40968236	3757.11	0.57373	3652.49	0.609675	43.9568	0.0383009	1.93142e-20	0.266803	1.12259e+06	0.283504	0.167321	0.165895
BAIAP2	17	80535122	81617434	8044.99	0.441357	8803.28	0.381067	74.0795	0.237724	5.0472e-20	0.062534	1.12599e+06	0.55259	3.68753	1.26106
BAIAP2L1	7	97791650	98901090	5082.91	0.387434	5112.91	0.41006	18.4055	0.634722	1.82644e-20	0.687542	1.10494e+06	0.73699	0.152695	0.157408
BAIAP2L2	22	37584652	38611015	2699.98	0.449641	2798.83	0.448283	11.8985	0.55918	1.08758e-20	0.704888	1.04345e+06	0.675991	0.345115	0.254229
BAIAP3	16	833638	1849439	5605.34	0.77762	5834.34	0.735647	50.089	0.510868	1.82493e-20	0.712624	1.28861e+06	0.340628	0.344078	0.253767
BAK1	6	33072547	34080293	5884.16	0.0361263	5549.86	0.0471748	28.2527	0.366566	2.74677e-20	0.44474	2.33286e+06	0.0100745	2.49404	0.942038
BAMBI	10	28177510	29182932	15915.3	0.0267995	16061.6	0.0200538	24.0865	0.755734	3.47152e-20	0.543832	1.87944e+06	0.0247426	0.256113	0.212679
BANF1	11	65502228	66504149	3463.71	0.180563	3350.42	0.182838	6.97839	0.614911	5.96054e-21	0.663176	1.19018e+06	0.272804	1.70273	0.716853
BANF2	20	17193672	18235871	3597.63	0.972301	3703.5	0.968763	17.6786	0.73065	2.19975e-20	0.612421	1.23889e+06	0.345611	1.23269	0.573677
BANK1	4	100911286	102574812	6203.41	0.180762	6182.11	0.180887	26.6283	0.232759	2.44263e-20	0.19115	1.31367e+06	0.13571	1.62015	0.692353
BANP	16	87449244	88577318	12304.1	0.230436	11925.4	0.274342	46.5396	0.64441	3.92708e-20	0.697145	1.03225e+06	0.764764	3.26169	1.14926
BAP1	3	51901008	52910008	493.047	0.679222	563.05	0.653029	3.55594	0.356052	1.91967e-21	0.363955	1.12578e+06	0.417882	0.350172	0.256478
BARD1	2	214225646	215309683	6657.25	0.487941	6640.39	0.485348	8.48831	0.898704	1.7916e-20	0.648798	2.79841e+06	0.0335853	0.969405	0.488346
BARHL1	9	132082606	133090252	8468.92	0.0234	8809.33	0.018302	64.3669	0.00390789	3.24955e-20	0.0892559	1.22817e+06	0.202631	2.22264	0.866459
BARHL2	1	90211539	91217302	1462.28	0.86773	1398.7	0.892588	12.497	0.281229	1.29083e-20	0.253956	140908	0.648785	0.28934	0.228674
BARX1	9	93451627	94455355	1359.1	0.922024	1372.22	0.924881	2.49056	0.987219	4.019e-21	0.985597	689786	0.102107	1.40254	0.626539
BARX2	11	128875848	129952279	2003.09	0.990908	2066.32	0.988406	17.3202	0.884845	1.43083e-20	0.886281	557313	0.500532	3.90921	1.31856
BASP1	5	16565598	17776843	14817	0.00151561	15213.5	0.00137937	24.0421	0.868348	4.95673e-20	0.0527538	845512	0.328002	0.238736	0.204036
BATF	14	75022455	76046993	5815.18	0.263378	5684.5	0.294519	44.2227	0.0735692	1.64968e-20	0.488777	943797	0.563369	1.818	0.750677
BATF2	11	64487945	65497018	2843.64	0.269012	2771.11	0.269533	5.3011	0.76074	9.64588e-21	0.615039	1.98993e+06	0.120782	0.534647	0.332865
BATF3	1	212186417	213199840	1437.86	0.944562	1458.44	0.933686	20.0409	0.268321	1.95814e-20	0.0832432	1.50742e+06	0.0592963	0.00464337	0.0242593
BAX	19	48454815	49461798	9483.41	0.191032	9794.34	0.159252	40.4652	0.259292	3.21062e-20	0.0856389	2.11394e+06	0.0683672	0.0347661	0.0695162
BAZ1A	14	34252731	35375647	4010.08	0.587489	4062.37	0.592694	11.8225	0.838639	1.80644e-20	0.592245	76361.8	0.807361	1.83257	0.754921
BAZ1B	7	72940406	74022293	4013.71	0.148511	4188.72	0.12805	9.49346	0.545454	8.15097e-21	0.410649	1.38497e+06	0.224899	3.98152e-05	0.00219201
BAZ2A	12	56095596	57136816	9263.15	0.0067289	9471.32	0.00728624	22.4376	0.141734	9.56087e-21	0.415741	1.97784e+06	0.0556755	0.000278107	0.00581722
BAZ2B	2	158818979	160116569	6360.33	0.182936	6501.39	0.170369	36.1496	0.163801	3.60572e-20	0.0284423	2.13481e+06	0.0121856	2.04273	0.815494
BBC3	19	46720822	47732766	6904.73	0.190465	6835.65	0.203146	24.1704	0.482998	2.75868e-20	0.215777	1.18651e+06	0.324961	0.208112	0.188257
BBIP1	10	110398730	111419201	8299.78	0.0978385	8375.02	0.114873	15.0853	0.948177	1.5804e-20	0.748771	542801	0.372679	0.61298	0.362843
BBLN	9	127660265	128663924	5844.43	0.257437	6043.21	0.214765	14.1826	0.586367	9.83773e-21	0.664924	1.03391e+06	0.104927	2.17341	0.852587
BBOF1	14	73519349	74582863	2160.68	0.85732	2160.46	0.859887	5.94352	0.760721	8.10992e-21	0.914896	1.55175e+06	0.0921442	0.0245001	0.0576848
BBOX1	11	26540725	27627809	5828.04	0.524425	5680.89	0.547813	29.1643	0.391784	2.22209e-20	0.254067	1.28859e+06	0.0879897	2.35556	0.903656
BBS1	11	66010606	67033613	1846.19	0.461173	1739.5	0.480295	4.11828	0.669012	3.18847e-21	0.792204	2.10297e+06	0.0145272	0.164624	0.164351
BBS10	12	75844474	76848415	3651.87	0.417375	3696.64	0.431046	11.4681	0.265815	2.97979e-20	0.011737	1.42053e+06	0.861969	3.62011	1.24348
BBS12	4	122232702	123244942	4167.21	0.153688	4195.97	0.153928	45.8472	0.0135932	2.52714e-20	0.0390381	1.43822e+06	0.043723	4.99329	1.59439
BBS2	16	55965640	57082667	10043.8	0.0313136	10233	0.0309737	13.0175	0.59551	4.3189e-20	0.0448197	1.92382e+06	0.00809182	0.142735	0.151456
BBS4	15	72186179	73238475	15518.9	0.00206109	15978.2	0.00199667	32.1589	0.0801881	1.49273e-20	0.0602156	786841	0.387039	2.16466	0.850116
BBS5	2	168979480	170006655	7323.65	0.123972	7163.38	0.137494	29.5143	0.278843	2.20398e-20	0.282087	1.38781e+06	0.209439	1.01027	0.501912
BBS7	4	121324329	122370487	3146.38	0.533047	3236.81	0.503616	24.4562	0.214922	2.35476e-20	0.232706	2.17169e+06	0.0150095	0.00972018	0.0355221
BBS9	7	32609557	34377180	11733.5	0.115406	11956.1	0.102905	45.6893	0.0459411	3.62722e-20	0.176113	436656	0.585678	0.089313	0.116309
BBX	3	107022936	108311339	5964.07	0.356558	5914.72	0.353564	12.4516	0.902246	1.73899e-20	0.726438	1.18052e+06	0.0955232	4.49927	1.46968
BCAM	19	44309071	45321421	2624.9	0.914479	2819.19	0.880746	24.1022	0.241252	2.93764e-20	0.29586	2.55137e+06	0.0994232	0.621215	0.36593
BCAN	1	156141390	157159532	6836.52	0.245773	7488.47	0.170561	62.2291	0.0157277	2.9493e-20	0.0256003	1.34697e+06	0.351919	0.00199195	0.0157422
BCAP29	7	107080246	108129170	2724.12	0.357127	2778.52	0.361799	1.92381	0.91323	9.00736e-21	0.516242	961344	0.597682	0.317296	0.241666
BCAR1	16	74728181	75768053	4063.55	0.493782	4151.07	0.479979	12.0499	0.393634	1.62053e-20	0.197543	269169	0.629589	0.125091	0.140515
BCAR3	1	93061741	94347150	6000.42	0.390929	5952.01	0.411574	17.7503	0.385072	1.72682e-20	0.422367	1.1783e+06	0.44065	0.207126	0.187736
BCAS1	20	53436777	54570594	1887.54	0.986615	1985.06	0.979419	8.31096	0.984084	1.93484e-20	0.730011	1.38902e+06	0.137713	0.173742	0.169535
BCAS2	1	114067557	115081629	1425.92	0.922501	1348.44	0.923839	14.1753	0.535895	1.44924e-20	0.504224	951725	0.594992	0.393007	0.275132
BCAS3	17	60177453	61892838	9196.38	0.0589626	9649.87	0.0525257	32.9402	0.0768837	3.40995e-20	0.0353222	2.74848e+06	0.016149	0.970755	0.488796
BCAS4	20	50294894	51377177	4831.45	0.352653	4665.41	0.36408	12.127	0.430936	1.98833e-20	0.572176	1.28505e+06	0.0284953	0.666053	0.382548
BCAT1	12	24310024	25449101	6294.4	0.49834	6591.76	0.460053	40.7199	0.187196	2.61847e-20	0.494298	2.88778e+06	0.0317556	2.04273	0.815494
BCAT2	19	48295062	49311029	10180	0.115839	10328.9	0.0993195	43.6027	0.0735124	3.78099e-20	0.0212006	2.09012e+06	0.0136314	0.183098	0.174753
BCCIP	10	125323546	126353695	3900.85	0.526916	4045.87	0.463369	10.2182	0.886587	1.3006e-20	0.824131	1.36978e+06	0.411974	0.0287335	0.0627853
BCDIN3D	12	49336043	50343106	2215.83	0.368324	2377.05	0.364581	9.20365	0.765212	8.75855e-21	0.751957	1.45131e+06	0.149829	0.258443	0.213823
BCHE	3	165272904	166337462	778.573	0.841599	779.889	0.822026	2.22719	0.920578	4.72061e-21	0.924058	822895	0.586085	15.1582	4.00494
BCKDHA	19	40897808	41925002	1139.15	0.952052	1214.26	0.946605	18.2124	0.54837	2.43713e-20	0.288446	1.35007e+06	0.166163	0.40619	0.280743
BCKDHB	6	79606647	80846270	4071.41	0.431892	3995.88	0.46555	10.6227	0.836735	9.67382e-21	0.924869	1.83792e+06	0.000992738	0.82199	0.438184
BCKDK	16	30606107	31612791	16884	8.98032e-06	16744.2	7.55222e-06	6.98395	0.0893355	1.28661e-20	0.054888	1.52858e+06	0.222686	1.88077	0.76892
BCL10	1	84765776	85776632	5649.78	0.323962	5685.96	0.327393	18.6141	0.50818	2.06321e-20	0.480134	1.3597e+06	0.783987	0.537633	0.33403
BCL11A	2	59950520	61054467	1742.16	0.816937	1771.85	0.806634	9.3465	0.417855	1.22399e-20	0.60583	1.05929e+06	0.330935	0.848012	0.447191
BCL11B	14	98669287	99772197	12232.1	0.110558	11758.5	0.144116	48.2789	0.0462196	3.58751e-20	0.34347	1.60107e+06	0.0361887	0.13641	0.147595
BCL2	18	62623346	63820128	21862.1	5.22039e-08	24754.2	5.56452e-09	118.752	3.16645e-08	1.71243e-20	0.471323	1.38454e+06	0.352694	2.67308	0.99115
BCL2A1	15	79460892	80471196	9427.03	0.00118373	9308.23	0.00133107	25.9695	0.350895	1.78878e-20	0.482335	1.45059e+06	0.184101	0.719687	0.402034
BCL2L1	20	31164452	32223989	865.098	0.458689	830.578	0.476347	2.6952	0.735091	1.57217e-21	0.853325	1.74141e+06	0.238932	0.967974	0.487868
BCL2L10	15	51609263	52612775	5450	0.0374507	5314.46	0.0403642	20.7552	0.194468	3.41825e-20	0.0250633	1.05297e+06	0.808758	0.169624	0.167206
BCL2L11	2	110619378	111668444	7126.11	0.151201	7001.19	0.144566	24.3894	0.366073	2.83704e-20	0.197921	1.14173e+06	0.306498	0.796994	0.429464
BCL2L12	19	49165142	50173916	10863.9	0.0148189	11070.1	0.012604	59.4179	0.010829	1.54015e-20	0.235755	1.17327e+06	0.15293	0.11407	0.133384
BCL2L13	22	17128855	18230855	5269.77	0.70271	5261.16	0.700609	36.7648	0.179499	3.20012e-20	0.327188	1.65292e+06	0.0882535	0.276343	0.222495
BCL2L14	12	11549844	12711084	22999.8	0.00419532	23840.3	0.00383193	40.205	0.64699	5.08272e-20	0.00576321	1.37118e+06	0.238638	1.01792	0.504436
BCL2L15	1	113376816	114387581	1933.85	0.808394	1868.69	0.803901	25.5247	0.287943	1.83742e-20	0.376653	1.15043e+06	0.706974	1.13468	0.542453
BCL2L2	14	22798790	23811751	11288.4	0.0397337	11443.6	0.0478494	52.7398	0.15186	3.1041e-20	0.266408	1.54746e+06	0.182666	0.0308095	0.0651653
BCL2L2-PABPN1	14	22806833	23826175	11287.7	0.0366355	11442.7	0.0437444	52.735	0.143484	3.10393e-20	0.257927	530741	0.925298	0.320146	0.242969
BCL3	19	44247705	45260044	2623.13	0.912785	2816.58	0.877696	24.0187	0.22133	2.93285e-20	0.284539	1.2444e+06	0.423818	0.00879029	0.0337162
BCL6	3	187221377	188245725	7405.75	0.478164	7711.76	0.46473	27.5129	0.687115	2.69266e-20	0.536223	1.25564e+06	0.426388	0.0052069	0.0257299
BCL6B	17	6523050	7530290	4774.71	0.501441	4686.58	0.484803	22.2669	0.376359	1.23164e-20	0.885852	893796	0.683191	0.377389	0.268408
BCL7A	12	121519422	122562044	3263.28	0.120477	3374.69	0.129071	11.5467	0.585108	1.05736e-20	0.632547	181635	0.955937	0.444583	0.296778
BCL7B	7	73036356	74057690	4075.17	0.152565	4254.32	0.13194	9.56104	0.547179	9.03259e-21	0.448665	1.25893e+06	0.492584	2.25643	0.875951
BCL7C	16	30333626	31394302	16070	2.38771e-05	15926.3	2.16667e-05	10.986	0.237731	1.91938e-20	0.0721946	1.07663e+06	0.0496541	2.25891	0.876647
BCL9	1	147041501	148126216	9668.22	0.0317473	9414.61	0.0322011	24.171	0.27937	2.92277e-20	0.07759	2.07889e+06	0.0118484	0.469204	0.306842
BCL9L	11	118393875	119425926	3155.03	0.181478	3075.85	0.187171	7.03108	0.220852	1.01561e-20	0.433744	1.47077e+06	0.0609449	0.0683954	0.10035
BCLAF1	6	135756627	136789851	466.829	0.780038	429.977	0.834837	6.79558	0.235044	1.02221e-20	0.233521	899180	0.0389378	0.0705141	0.102049
BCO1	16	80738689	81791142	14419.4	0.13977	14715.9	0.133904	64.629	0.138795	4.08698e-20	0.28042	1.47223e+06	0.0439183	0.0250238	0.0583356
BCO2	11	111675510	112724699	16803.5	1.13172e-06	17325.1	1.08379e-06	15.6471	0.525626	5.01902e-21	0.972018	285989	0.850098	0.422573	0.28764
BCR	22	22679704	23818037	9709.53	0.278929	9948.39	0.253229	29.0906	0.410392	3.744e-20	0.149287	1.06842e+06	0.647271	0.124723	0.140281
BCS1L	2	218158764	219163443	801.566	0.76273	801.526	0.740854	15.8733	0.259943	3.28708e-21	0.320378	941001	0.370839	0.200492	0.184207
BDH1	3	197009783	198073323	5506.85	0.279821	5428.75	0.280523	12.7757	0.776519	2.07044e-20	0.299344	1.44307e+06	0.354007	0.101916	0.125204
BDH2	4	102577592	103599870	224.365	0.962719	257.842	0.959273	4.45362	0.527582	2.67965e-21	0.783626	160652	0.0661138	0.43616	0.293298
BDKRB1	14	95756210	96768967	2744.41	0.787336	2954.2	0.748999	53.3038	0.0816239	2.15563e-20	0.344206	280271	0.11257	2.28567	0.884144
BDKRB2	14	95704679	96744166	2749.89	0.792402	2960.04	0.759799	53.2002	0.0503533	2.15732e-20	0.312965	829202	0.353119	0.00271382	0.0184289
BDNF	11	27154893	28222058	2567.43	0.432621	2435.64	0.468777	14.9522	0.362642	1.21309e-20	0.387578	1.06671e+06	0.218156	0.0482057	0.0829067
BDP1	5	70955651	72067820	452.966	0.615032	472.091	0.665826	10.1847	0.388045	6.10958e-21	0.635595	1.01284e+06	0.335816	0.914984	0.470062
BEAN1	16	65927295	66993529	3274.25	0.0574147	3466.52	0.0590198	11.985	0.34444	3.31101e-21	0.940159	1.5844e+06	0.256615	0.853253	0.448997
BECN1	17	42310134	43333350	2766.56	0.412541	2812.81	0.410721	8.51025	0.409324	6.41018e-21	0.525104	2.30798e+06	0.0436439	4.20352	1.39426
BECN2	1	241457767	242459062	8208.97	0.706867	8367.18	0.70673	39.3021	0.611397	3.16049e-20	0.653694	1.40852e+06	0.0467401	0.327208	0.246181
BEGAIN	14	100037147	101087417	7855.71	0.159757	7987.97	0.163441	24.1478	0.477305	3.4556e-20	0.230527	1.49691e+06	0.11776	3.32224	1.16527
BEND3	6	106565182	107615515	6990.53	0.114856	7224.07	0.100647	54.0594	0.117416	2.19954e-20	0.0777377	77668.4	0.881072	4.27727	1.41313
BEND4	4	41610853	42652878	1716.67	0.426803	1736.97	0.425807	12.3723	0.17309	2.65895e-20	0.0168275	1.04633e+06	0.00728424	1.6847	0.711526
BEND5	1	48227519	49276969	4336.72	0.544741	4601.88	0.470332	14.1048	0.75886	1.26998e-20	0.52246	807834	0.806975	2.35992	0.904871
BEND6	6	56455107	57527346	12054.3	2.29975e-05	11905.3	2.13162e-05	34.7142	0.00420342	2.09748e-20	0.00102377	1.1669e+06	0.218687	0.599819	0.357885
BEND7	10	12938484	14029014	13431.4	0.234668	13507.9	0.234078	57.4827	0.447922	4.31121e-20	0.606296	1.44088e+06	0.165106	0.230715	0.199975
BEST1	11	61450063	62465515	24831.7	2.11338e-06	25512.2	2.06534e-06	33.8886	0.151067	3.27954e-20	0.198548	1.55527e+06	0.0102025	0.6057	0.360104
BEST2	19	12251702	13258458	3465.19	0.717053	3388.94	0.728121	22.5946	0.351786	2.30453e-20	0.204043	1.78971e+06	0.0233623	0.30431	0.23568
BEST3	12	69143360	70199476	2364.4	0.698102	2511.35	0.697149	17.9455	0.184924	2.45548e-20	0.182534	1.19357e+06	0.0949777	0.0189935	0.0504221
BEST4	1	44283585	45288170	8974.12	0.0306626	9401.28	0.027749	34.9481	0.00519165	1.86539e-20	0.300976	1.47938e+06	0.0823747	0.635254	0.371167
BET1	7	93462762	94504382	3995.51	0.228184	4044.86	0.23144	7.60466	0.335193	1.58498e-20	0.0648	2.83726e+06	0.041384	0.00186734	0.0152334
BET1L	11	1	707399	11247.3	0.0152524	11925.8	0.00927429	49.5582	0.0102751	3.31869e-20	0.0165245	926557	0.632947	3.55119e-07	0.000206545
BFAR	16	14132931	15169236	3450.53	0.304406	3619.08	0.302706	22.1251	0.0616561	2.15476e-20	0.219454	844098	0.319841	0.24977	0.209548
BFSP1	20	16993905	18069220	4047.3	0.835692	4183.91	0.831311	20.0058	0.784105	2.4432e-20	0.686005	1.74291e+06	0.00155096	0.0836715	0.112168
BFSP2	3	132900056	133975222	5651.71	0.494306	5663.18	0.496761	36.5378	0.376434	3.90627e-20	0.0430982	1.07134e+06	0.553065	0.0171481	0.047782
BGLAP	1	155742184	156743317	4327.69	0.637348	4146.73	0.646293	24.7454	0.423366	2.32875e-20	0.119457	1.22849e+06	0.510814	3.17106	1.12521
BHLHA15	7	97711439	98715457	4020.13	0.359943	4086.72	0.382738	16.5503	0.601523	1.68895e-20	0.559495	1.28488e+06	0.0636989	1.96217	0.792415
BHLHA9	17	770444	1771815	13561.4	0.0737636	14093.9	0.0626019	37.7444	0.50689	3.73969e-20	0.347256	555713	0.200547	0.000839661	0.0101574
BHLHE22	8	64080365	65083627	2037.32	0.343147	2014.08	0.391512	9.81324	0.295331	7.30147e-21	0.569771	1.14595e+06	0.264248	0.755912	0.414979
BHLHE23	20	62505927	63507035	13038	0.16669	13254.3	0.171964	42.6323	0.634949	3.33883e-20	0.677003	1.87733e+06	0.0285716	0.668468	0.383434
BHLHE40	3	4479437	5485323	14729.3	0.208796	15019.5	0.196833	63.7945	0.347269	6.47967e-20	0.0692915	2.42463e+06	0.102533	0.719215	0.401865
BHLHE41	12	25620030	26625037	5286.48	0.135033	5185.86	0.143896	29.0381	0.240117	3.35606e-20	0.158016	1.15301e+06	0.24581	0.485854	0.313558
BHMT	5	78611809	79632288	3866.78	0.305501	3827.59	0.340069	22.2373	0.285913	2.43124e-20	0.279374	1.80609e+06	0.0936683	2.0659	0.822101
BHMT2	5	78569767	79590069	3842.57	0.269073	3801.29	0.299136	22.1943	0.277333	2.41866e-20	0.2427	2.10744e+06	0.027558	0.0783499	0.108158
BICC1	10	58012872	59331435	3183.4	0.501544	3187.74	0.506066	12.1985	0.51823	1.21065e-20	0.510692	1.80066e+06	0.05686	0.102485	0.125595
BICD1	12	31606835	32883633	8141.7	0.336643	8261.67	0.287595	62.1938	0.0771511	4.62434e-20	0.0476626	1.77909e+06	0.0463954	0.154058	0.158211
BICD2	9	92211363	93264833	1421.3	0.836156	1510.43	0.835953	11.4635	0.704117	6.86785e-21	0.737086	1.54147e+06	0.165536	0.0403047	0.0752629
BICDL1	12	119489236	120594494	677.648	0.845223	705.739	0.858296	3.67935	0.804263	9.23213e-21	0.661644	1.39302e+06	0.419552	0.0632833	0.0961616
BICDL2	16	2527682	3536944	2854.8	0.583712	3007.47	0.577179	9.8611	0.798067	1.26896e-20	0.539548	438212	0.927216	0.0292636	0.0634
BICRA	19	47108196	48203277	8585.44	0.10021	8509.89	0.105938	25.1625	0.336301	3.80411e-20	0.109023	772462	0.487817	0.674501	0.385644
BICRAL	6	42282052	43368558	1496.43	0.691651	1468.28	0.702115	4.97915	0.883121	4.45839e-21	0.963539	1.58506e+06	0.5296	0.0787637	0.108474
BID	22	17234138	18274770	4755.21	0.607331	4728.23	0.601226	32.6891	0.165814	2.75453e-20	0.267599	1.06871e+06	0.144362	2.87335	1.04548
BIK	22	42610750	43629712	7576.57	0.0183521	7900.6	0.014633	39.6694	0.0790416	2.58931e-20	0.254551	1.61676e+06	0.0998611	7.20468	2.13838
BIN1	2	126548027	127607288	4039.28	0.808177	3961.08	0.806947	20.7128	0.20011	1.27647e-20	0.754984	1.17416e+06	0.470712	0.234825	0.202062
BIN2	12	50781038	51824668	1815.36	0.89564	1721.29	0.924592	9.07043	0.777702	1.74966e-20	0.389867	1.60605e+06	0.1132	1.67825	0.709616
BIN3	8	22120418	23169148	5985.31	0.255332	5870.84	0.285353	17.8568	0.458601	2.65603e-20	0.141572	445883	0.966108	0.181597	0.173922
BIRC2	11	101847211	102878670	3529.58	0.503663	3587.11	0.482595	16.4268	0.658316	1.68037e-20	0.424097	977419	0.676348	0.00387837	0.0221198
BIRC3	11	101817484	102839403	3528.68	0.492581	3586.28	0.472613	16.4256	0.656374	1.67888e-20	0.382137	1.99319e+06	0.0882886	0.109295	0.130212
BIRC5	17	77714186	78725636	5444.01	0.477072	5497.09	0.492613	57.972	0.00476917	5.58162e-20	0.0178287	561092	0.625728	0.586794	0.352948
BIRC6	2	31857023	33119571	9345.92	0.00109505	8741.95	0.00152209	32.5472	0.0143133	2.38558e-20	0.0102125	558113	0.616159	0.000321019	0.00625301
BIRC7	20	62735883	63740495	18278	0.0198808	18373.9	0.0226971	45.9259	0.320987	3.91232e-20	0.362661	1.27977e+06	0.453655	1.09232	0.528769
BIVM	13	102299119	103341533	11010.1	0.00109877	11040.8	0.000830856	22.223	0.425313	2.02435e-20	0.431791	1.48561e+06	0.475921	0.219341	0.19413
BIVM-ERCC5	13	102299110	103375994	11010.1	0.00109877	11040.8	0.000830856	22.223	0.425313	2.02435e-20	0.431791	1.46476e+06	0.241241	2.3819	0.910985
BLACAT1	1	204934885	205957091	11253.9	0.0366778	11851.7	0.028223	35.6043	0.142368	2.94742e-20	0.419745	1.02772e+06	0.232525	0.761074	0.41681
BLCAP	20	36992472	38027931	3033.8	0.129303	3071.52	0.11821	14.673	0.547498	6.30495e-21	0.89535	1.03832e+06	0.245494	1.52807	0.664737
BLID	11	121615340	122616215	4565.69	0.53864	4488.21	0.592293	41.2283	0.102746	1.12512e-20	0.859354	254571	0.371264	2.57044	0.963063
BLK	8	10986894	12064599	7700.91	0.572044	7638.16	0.585952	43.8899	0.16768	3.4154e-20	0.321807	1.84448e+06	0.0043028	0.282868	0.225609
BLM	15	90217346	91316166	4108.77	0.17232	4167.01	0.196435	24.714	0.385715	2.08286e-20	0.322857	1.0227e+06	0.0556084	2.95552	1.0676
BLMH	17	29748203	30792056	1802.47	0.18436	1773.02	0.1736	5.6626	0.318633	4.18991e-21	0.142993	1.4365e+06	0.24392	2.08074	0.826325
BLNK	10	95689171	96771587	9092.93	0.0371618	8794.69	0.0480854	35.7878	0.204356	2.57159e-20	0.114646	614614	0.489382	0.0325929	0.0671547
BLOC1S1	12	55216038	56220087	6732.14	0.00990504	7170.37	0.0102913	49.6311	0.00347977	2.19537e-20	0.103794	1.72155e+06	0.315611	0.0676605	0.0997564
BLOC1S2	10	99773280	100786680	10262.2	0.00012367	11193.4	6.77733e-05	51.0023	0.0343104	1.787e-20	0.0227219	1.14726e+06	0.216027	0.788796	0.426589
BLOC1S3	19	44678784	45716933	2004.37	0.90884	2255.3	0.878639	22.3768	0.224655	2.19438e-20	0.168575	1.36653e+06	0.465074	1.22004	0.56968
BLOC1S4	4	6216174	7217664	18228.7	0.0431954	17818.5	0.0541323	52.3221	0.26604	6.47584e-20	0.0296851	1.30184e+06	0.00011106	0.237187	0.203256
BLOC1S5	6	7513567	8564396	5868.72	0.61269	5857.6	0.615966	42.5561	0.128468	2.00451e-20	0.830257	1.21153e+06	0.474094	0.21897	0.193938
BLOC1S5-TXNDC5	6	7381522	8564364	6028.98	0.671106	6043.95	0.673603	43.9274	0.128086	2.20999e-20	0.810853	1.52612e+06	0.411643	0.154576	0.158515
BLOC1S6	15	45087214	46115945	3222.17	0.030693	3228.44	0.0243942	40.391	0.00593901	3.4144e-20	0.0088328	1.6118e+06	0.115468	1.59943	0.686167
BLTP1	4	121652331	122864167	2991.76	0.349625	2883.23	0.378446	29.4137	0.128411	1.09269e-20	0.618077	1.7769e+06	0.163322	1.28513	0.590155
BLTP2	17	28114446	29145454	3261.38	0.126079	3129.43	0.126907	4.60274	0.579621	7.46225e-21	0.619802	1.28993e+06	0.26027	0.0256532	0.0591101
BLTP3A	6	34292083	35377514	4949.12	0.0280428	4884.34	0.0301137	14.5072	0.339253	9.69164e-21	0.46906	1.34035e+06	0.0516751	0.0101297	0.0362919
BLTP3B	12	99528455	100642874	2575.97	0.344108	2703.69	0.32968	5.15022	0.834091	3.22169e-21	0.963701	1.22888e+06	0.339377	0.145439	0.153087
BLVRA	7	43258680	44307342	827.306	0.908114	866.414	0.905383	5.84214	0.729035	5.84628e-21	0.918812	1.54275e+06	0.157306	0.0990657	0.123232
BLVRB	19	39947765	40965764	1641.5	0.661009	1710	0.654944	11.9571	0.566181	9.32618e-21	0.616483	1.19792e+06	0.00424152	0.659016	0.37996
BLZF1	1	168867970	169896540	2260.71	0.471883	2328.15	0.467637	8.05614	0.39028	1.78014e-20	0.225763	1.66127e+06	0.347613	0.161281	0.162424
BMAL1	11	12776652	13887266	2799.98	0.744958	2861.06	0.721723	14.8199	0.775631	1.657e-20	0.785161	1.09916e+06	0.74165	0.739506	0.409137
BMAL2	12	26832836	27925289	7114.04	0.434207	7212.91	0.42791	21.2182	0.692539	4.44386e-20	0.0561278	391130	0.629449	0.982588	0.492737
BMERB1	16	14934475	16125028	5837.69	0.0871059	5936.97	0.0980208	50.3769	0.0859336	3.39702e-20	0.100376	1.73437e+06	0.0509949	0.298101	0.232788
BMF	15	39587890	40608892	4517.04	0.53362	4308.8	0.571435	25.9019	0.269795	1.6619e-20	0.495462	1.81152e+06	0.28223	0.317062	0.241559
BMI1	10	21821099	22831484	341.727	0.968242	334.222	0.963463	1.43254	0.930407	2.11996e-21	0.968835	1.4057e+06	0.156744	0.897445	0.464114
BMP1	8	21665140	22712326	4962.83	0.219339	4957.18	0.236821	23.6914	0.376709	2.23335e-20	0.184935	1.6805e+06	0.208379	0.186637	0.176701
BMP10	2	68360909	69371397	4359.76	0.0899526	4340.32	0.0952555	5.28819	0.775444	1.25403e-20	0.349277	2.14698e+06	0.0730738	0.0590516	0.0925879
BMP2	20	6267686	7280246	3810.91	0.465012	3810.75	0.497315	5.14603	0.999479	1.01166e-20	0.986884	2.20762e+06	0.0784704	4.49927	1.46968
BMP2K	4	78276342	79416365	5213.86	0.152869	5133.34	0.171112	24.4261	0.0811915	1.14754e-20	0.711956	3.81927e+06	5.64111e-05	0.00205208	0.0159823
BMP3	4	80530708	81557627	4775.34	0.0640233	4929.06	0.0601394	12.0181	0.0640127	1.29051e-20	0.0790563	1.48765e+06	0.414459	0.0215082	0.0538412
BMP4	14	53449736	54458761	8681.33	0.0364049	8608.94	0.0362989	52.5835	0.0118939	3.5198e-20	0.0262366	2.29081e+06	0.0262068	0.406201	0.280748
BMP5	6	55253653	56375590	2176.27	0.915625	2199.95	0.914478	11.3022	0.903043	1.70263e-20	0.274479	1.00992e+06	0.650444	0.00340667	0.0206991
BMP6	6	7226099	8381728	6351.32	0.510123	6305.46	0.534633	47.7712	0.107001	3.80791e-20	0.174285	2.68438e+06	0.014976	0.202986	0.185539
BMP7	20	56668753	57766641	11577	0.0457481	11870.4	0.0517231	53.4956	0.182106	6.25179e-20	0.226731	1.46732e+06	0.539455	2.04414	0.815896
BMP8A	1	38991636	40029869	2709.46	0.719518	2921.64	0.683102	24.4982	0.237321	2.44096e-20	0.19122	1.71923e+06	0.220559	1.03996	0.511688
BMP8B	1	39257182	40288865	2272.29	0.79877	2548.39	0.746462	22.8327	0.35516	1.2081e-20	0.761932	1.34208e+06	0.0182457	0.684615	0.389338
BMPER	7	33404308	34656427	9878.2	0.0881156	10027.1	0.0771116	42.9877	0.0395275	2.81063e-20	0.13294	2.09296e+06	0.0669569	0.0097766	0.035629
BMPR1A	10	86256596	87432825	2486.33	0.78259	2685.35	0.755651	22.6873	0.5551	1.26423e-20	0.727905	1.95643e+06	0.0823242	2.7744	1.01871
BMPR1B	4	94257955	95658448	6425.53	0.163634	6199.11	0.191106	40.1032	0.255277	1.84233e-20	0.891203	2.14956e+06	0.00442962	1.54218	0.66899
BMPR2	2	201876327	203067751	9833.83	0.004748	9711.08	0.00603279	27.8032	0.168092	2.34134e-20	0.0937466	1.26608e+06	0.613019	2.27485	0.881113
BMS1	10	42282795	43334937	1893.15	0.5877	1974.05	0.585037	14.7093	0.0839646	2.05072e-20	0.0380801	1.79992e+06	0.105269	4.54558	1.48143
BMT2	7	112319147	113439875	4675.46	0.330151	4733.74	0.29989	24.6164	0.254477	8.09689e-21	0.736442	464450	0.0211343	0.0988929	0.123111
BNC1	15	82755884	83784664	2782.83	0.537071	2965.97	0.51231	9.70859	0.474178	8.67949e-21	0.860735	1.53944e+06	0.103358	0.00444316	0.0237166
BNC2	9	15909503	17370843	8903.89	0.366202	9040.21	0.393215	29.2822	0.744161	2.84854e-20	0.777969	1.29368e+06	0.28942	0.296258	0.231926
BNIP1	5	172644442	173664387	4961.89	0.530018	4892.03	0.558479	31.0603	0.272092	3.71962e-20	0.166915	1.0864e+06	0.110959	0.668424	0.383418
BNIP2	15	59159146	60189339	6068.81	0.31794	6099.58	0.309306	21.1027	0.533363	2.18591e-20	0.426215	2.48587e+06	0.0358626	2.53672	0.953796
BNIP3	10	131467684	132481967	7115.03	0.435219	6916.11	0.498712	44.088	0.174052	2.28771e-20	0.732816	226657	0.0840608	0.00207309	0.0160654
BNIP3L	8	25883054	27005636	4836.17	0.90697	4870.78	0.910112	20.116	0.824852	2.69585e-20	0.793088	2.02598e+06	0.0748926	0.201464	0.184726
BNIP5	6	35815761	36836888	5006.12	0.19191	4919.1	0.184681	8.84685	0.761158	1.18229e-20	0.669046	678927	0.588963	0.061092	0.0943237
BNIPL	1	150536321	151547720	3432.38	0.670686	3492.69	0.67552	15.2828	0.573869	5.42339e-21	0.843653	2.05899e+06	0.198834	0.137384	0.148194
BOC	3	112711003	113787459	3114.67	0.594819	3074.23	0.579553	13.0689	0.527347	1.26951e-20	0.718582	1.80484e+06	0.0355449	0.0388526	0.0737909
BOD1	5	173107145	174116659	3995.08	0.790032	3978.42	0.799126	45.9249	0.114584	4.19103e-20	0.0340266	1.72079e+06	0.0254322	1.88077	0.76892
BOD1L1	4	13068738	14127725	7326.46	0.116424	7136.13	0.129522	42.4635	0.0309942	4.19367e-20	0.0110998	843316	0.281488	5.53289	1.72904
BOD1L2	18	56647087	57650410	4015.19	0.214042	4157.71	0.193402	19.4274	0.523341	1.12917e-20	0.948704	246965	0.200876	0.297633	0.23257
BOK	2	241051424	242074131	1977.89	0.625581	2083.78	0.607864	9.17046	0.754048	4.04126e-21	0.98834	1.55236e+06	0.0625021	1.6847	0.711526
BOLA1	1	149387890	150400798	1051.18	0.847701	1106.91	0.831006	4.79631	0.732814	1.70069e-21	0.799005	1.28579e+06	0.0205948	4.59721	1.49452
BOLA2	16	28953590	29954351	6409.87	0.00513048	6452.79	0.0046356	18.8385	0.382005	3.75625e-21	0.966862	39487.5	0.962013	2.05415	0.818752
BOLA2-SMG1P6	16	28943230	29954651	6409.87	0.00513048	6452.79	0.0046356	18.8385	0.382005	3.75625e-21	0.966862	506304	0.110833	4.90682	1.57266
BOLA2B	16	29692932	30694306	6488.07	0.0031937	6371.3	0.00372604	7.51156	0.417704	1.36095e-20	0.145212	3.06147e+06	0.0012316	1.55362	0.672433
BOLA3	2	73635400	74647912	3653.99	0.2065	3692.57	0.205684	3.13716	0.64482	2.71639e-21	0.975828	3.09247e+06	0.00127402	0.140394	0.150034
BOLL	2	197226879	198286762	2615.47	0.00860269	2079.23	0.025553	52.2723	0.000954092	1.52454e-20	0.0499813	1.65351e+06	0.268984	0.113257	0.132847
BOP1	8	143762045	144791438	27740.9	1.26512e-08	28794.3	6.5382e-09	16.0119	0.0341363	6.72822e-21	0.630354	1.65082e+06	0.068012	0.0159613	0.046016
BORA	13	72227749	73256198	7541.83	0.155261	7771.1	0.141217	39.6433	0.0219166	2.90672e-20	0.0816042	62466.5	0.641987	1.62436	0.693607
BORCS5	12	11857078	12971233	21089.1	0.00179088	21383.6	0.00201506	61.3884	0.446089	6.57709e-20	0.00693669	538333	0.00406323	2.75195	1.01262
BORCS6	17	7688345	8690180	13034.4	0.00149181	12715.2	0.0016412	12.2926	0.298872	2.45897e-20	0.141585	2.15774e+06	0.0156357	0.424019	0.288245
BORCS7	10	102354259	103364961	1349.76	0.674938	1297.58	0.693724	7.80251	0.219597	4.41185e-21	0.384328	1.49793e+06	0.246051	1.04846	0.514473
BORCS7-ASMT	10	102354272	103401899	1349.76	0.674938	1297.58	0.693724	7.80251	0.219597	4.41185e-21	0.384328	1.35298e+06	0.279374	1.27429	0.586763
BORCS8	19	18676903	19692591	1264.84	0.701778	1250.26	0.69201	6.54166	0.525803	4.72799e-21	0.700156	1.03645e+06	0.240917	1.00292	0.499483
BORCS8-MEF2B	19	18645569	19692158	1265.26	0.782161	1250.62	0.765608	6.54363	0.620018	4.72877e-21	0.750044	1.0404e+06	0.248173	5.87204	1.81295
BPGM	7	134146811	135179816	3180.29	0.453007	3296.9	0.440424	5.03024	0.965392	5.73541e-21	0.984604	3.28505e+06	0.0154438	3.1719	1.12543
BPHL	6	2618374	3653578	7337.64	0.473573	7386.42	0.479027	24.226	0.703516	3.26783e-20	0.616642	3.30152e+06	0.0157334	0.639699	0.372819
BPI	20	37804150	38837505	3043.7	0.809396	3089.93	0.795891	13.7668	0.350641	9.4775e-21	0.552648	364919	0.42225	0.408951	0.281912
BPIFA1	20	32735995	33743311	1252.34	0.910958	1259.77	0.906954	0.877242	0.989006	3.0517e-21	0.861664	1.56363e+06	0.639961	0.592582	0.355146
BPIFA2	20	32661768	33681412	1324.17	0.857662	1311.21	0.854534	2.52939	0.807446	6.22555e-21	0.542173	2.44122e+06	0.00767972	0.365777	0.263352
BPIFA3	20	32717310	33727806	1252.34	0.910958	1259.77	0.906954	0.877242	0.989006	3.0517e-21	0.861664	957393	0.720745	9.50462	2.68834
BPIFB1	20	32773480	33809871	1170.59	0.921919	1181.68	0.918762	1.82566	0.94125	2.21991e-21	0.951591	961707	0.798653	2.69733	0.997764
BPIFB2	20	32507704	33523703	2729.61	0.611756	2700.07	0.609939	3.23502	0.921085	8.10689e-21	0.57331	960107	0.740407	0.399095	0.277731
BPIFB3	20	32553903	33573847	2722.29	0.535161	2693.33	0.538585	3.22324	0.891459	8.1003e-21	0.548859	976447	0.674424	0.86365	0.452571
BPIFB4	20	32579643	33611751	2722.29	0.535161	2693.33	0.538585	3.22324	0.891459	8.1003e-21	0.548859	1.10295e+06	0.690279	2.31501	0.892347
BPIFB6	20	32531648	33544047	2722.29	0.535161	2693.33	0.538585	3.22324	0.891459	8.1003e-21	0.548859	859520	0.91013	0.00161195	0.0141362
BPIFC	22	31913845	32964484	3971.85	0.565038	4116.66	0.53765	10.7415	0.933866	1.90787e-20	0.397967	852755	0.926278	0.00161195	0.0141362
BPNT1	1	219557482	220590462	3538.17	0.827782	3688.38	0.821082	53.1531	0.112898	2.17726e-20	0.214564	845698	0.925946	0.0115377	0.0388349
BPNT2	8	56457931	57493867	3289.29	0.458205	3277.09	0.463764	14.5713	0.395104	8.30443e-21	0.663616	1.22413e+06	0.580105	2.74643	1.01112
BPTF	17	67325503	68484378	9986.39	0.00523326	10577.8	0.00347675	25.1718	0.10154	1.52041e-20	0.714413	233413	0.0891094	2.74643	1.01112
BRAF	7	140219327	141424929	5846.22	0.239656	6034.39	0.239209	12.3383	0.817117	2.28104e-20	0.468638	1.5386e+06	0.00995232	1.0346	0.509927
BRAP	12	111142146	112185956	446.813	0.234887	441.673	0.229975	0.103119	0.527505	7.99972e-22	0.621073	1.69924e+06	0.092742	0.763359	0.417619
BRAT1	7	2037810	3055694	8059.97	0.0110641	7864.65	0.010988	25.9225	0.183408	2.20882e-20	0.604311	422833	0.473996	1.06225	0.518984
BRCA1	17	42544295	43670245	3047.07	0.262666	3180.28	0.238173	10.6442	0.152833	5.13316e-21	0.784571	730626	0.695084	3.56166	1.2282
BRCA2	13	31815086	32900268	3738.84	0.234953	3859.36	0.243902	9.96568	0.673399	1.85689e-20	0.270725	1.63693e+06	0.0573845	0.59613	0.35649
BRD1	22	49273283	50327873	8952.18	0.0382168	9134.08	0.0366763	42.1704	0.27288	3.49172e-20	0.181991	1.73112e+06	0.127931	1.11524	0.536188
BRD2	6	32468594	33481505	8081.37	0.0258843	8138.54	0.0294769	54.8107	0.176261	8.20878e-20	0.11649	1.20288e+06	0.503108	0.474204	0.308866
BRD3	9	133530305	134568535	17215.5	0.00447215	17820.7	0.00293784	68.6058	0.0161146	5.15739e-20	0.138681	1.41989e+06	0.167388	1.99144	0.80082
BRD3OS	9	133525481	134534666	17207.3	0.00416493	17809.2	0.0026775	68.3386	0.0130389	5.03114e-20	0.10919	1.12714e+06	0.64667	4.74884	1.53287
BRD4	19	14735519	15832545	4946.58	0.586957	5053.91	0.60305	45.3028	0.182816	2.99815e-20	0.454764	972575	0.00328693	0.426554	0.289303
BRD7	16	49813487	50868988	5544.77	0.236319	5821.23	0.225101	25.8083	0.315008	1.59604e-20	0.53275	964222	0.00299789	1.19013	0.560188
BRD8	5	137639770	138678953	4258.72	0.0658783	4147.72	0.0788966	4.37102	0.216823	5.6366e-21	0.401894	1.37114e+06	0.114012	2.12263	0.838221
BRD9	5	350291	1392801	20138.3	1.60865e-05	21122.1	9.63408e-06	79.011	0.080494	3.35309e-20	0.338558	2.1217e+06	0.00203903	2.02925	0.811644
BRDT	1	91449343	92514426	3555.01	0.428898	4027.85	0.351313	54.904	0.0718538	2.11487e-20	0.322747	511175	0.519554	0.0125787	0.0406243
BRF1	14	104709286	105815589	39009.7	4.67985e-05	40510	2.79441e-05	203.12	5.70866e-06	1.21553e-19	2.62834e-07	2.74259e+06	0.00100159	0.115285	0.134182
BRF2	8	37343268	38349861	1050.81	0.845681	1139.28	0.821115	55.3282	0.00914166	1.10799e-20	0.353748	596928	0.340444	0.06732	0.0994802
BRI3	7	97752379	98810441	4045.19	0.366054	4123.57	0.388379	17.1136	0.610129	1.78643e-20	0.625441	1.21001e+06	0.196968	1.14193	0.544782
BRI3BP	12	124493645	125531231	14776.1	0.0235708	15205.1	0.018149	42.4413	0.222266	4.24001e-20	0.21608	2.10535e+06	0.00163135	0.127853	0.142264
BRICD5	16	1709253	2710905	14658.7	0.000276953	14688	0.000176563	136.148	0.00797465	7.33851e-20	0.000105306	1.21082e+06	0.318409	0.0209952	0.0531588
BRINP1	9	118653458	119869435	5570.97	0.110349	5558.9	0.12896	20.5565	0.332193	2.0217e-20	0.66743	1.35757e+06	0.00707346	0.501532	0.319821
BRINP2	1	176670958	177782422	5649.95	0.0160034	5450.93	0.0175638	21.8282	0.0157272	1.46628e-20	0.07362	2.09691e+06	0.00673281	1.88759	0.770897
BRINP3	1	189597658	190978404	4099.84	0.272353	4330.05	0.255556	9.8273	0.261957	4.99361e-21	0.855528	1.68658e+06	0.0395558	0.177755	0.171785
BRIP1	17	61179139	62363559	7493.82	0.181893	7647.01	0.179748	27.2139	0.445354	3.13276e-20	0.123046	578370	0.515003	0.0012505	0.0124272
BRIX1	5	34415677	35425996	12038.9	0.00528946	12200.4	0.0050019	13.4659	0.947538	2.10635e-20	0.692628	214845	0.705094	0.00536312	0.0261241
BRK1	3	9615675	10627190	4092.91	0.446403	4308.41	0.408341	30.3106	0.584876	3.28159e-20	0.185134	1.84307e+06	0.0133665	0.759655	0.416306
BRME1	19	13382348	14406452	2922.2	0.845286	2768.31	0.854644	16.8518	0.889445	1.6455e-20	0.610662	1.48416e+06	0.153429	3.33442	1.16849
BRMS1	11	65837333	66845125	3225.2	0.174983	3068.68	0.176619	5.73965	0.561429	5.14742e-21	0.570687	2.83117e+06	0.0726979	5.52237e-05	0.0025827
BRMS1L	14	35326338	36432325	7440.57	0.037053	7712.6	0.0334415	24.4055	0.311745	1.09375e-20	0.930289	1.43251e+06	0.120657	0.171009	0.167992
BROX	1	222212553	223235196	5605.61	0.214978	5791.38	0.212115	29.1921	0.349912	2.22854e-20	0.385583	1.53947e+06	0.0456624	2.41388	0.919865
BRPF1	3	9231729	10248019	4764.7	0.294157	4845.12	0.280279	17.8214	0.896271	3.01192e-20	0.370964	1.82146e+06	0.0312517	0.00942154	0.0349512
BRPF3	6	35696744	36732790	4609.92	0.16797	4522.05	0.16126	8.72994	0.740333	1.07233e-20	0.799613	113047	0.950169	0.463981	0.304721
BRSK1	19	54782072	55812562	6595.65	0.555471	6669.6	0.535803	21.5649	0.405793	4.98823e-20	0.110307	1.98807e+06	0.287471	0.219123	0.194018
BRSK2	11	889899	1962689	9797.23	0.13619	9651.97	0.157473	25.0247	0.384482	1.4998e-20	0.974518	1.76074e+06	0.0327373	0.446132	0.297416
BRWD1	21	38684176	39821559	3599.58	0.76164	3362.64	0.80354	22.9841	0.704934	2.52011e-20	0.742751	1.7802e+06	0.26246	1.10492	0.532853
BSCL2	11	62189289	63209845	12211.9	0.00420687	12666.7	0.00265888	25.3465	0.175549	2.38333e-20	0.227584	2.33296e+06	0.00695348	0.60237	0.358848
BSDC1	1	31864633	32894731	4139.58	0.162232	4577	0.114783	16.9875	0.0275968	6.05599e-21	0.0698492	2.26073e+06	0.0780492	0.227169	0.198164
BSG	19	71277	1083494	11529.8	0.199976	11558.9	0.208375	35.9844	0.469204	5.74547e-20	0.143562	1.36082e+06	0.140451	0.589901	0.354129
BSN	3	49054477	50171549	4216.79	0.0186951	4538.4	0.0164164	10.6634	0.0147012	1.02394e-20	0.166421	1.18223e+06	0.477127	0.000581767	0.00843858
BSND	1	54498933	55517172	7840.7	0.349871	8176.99	0.313378	46.5387	0.28902	4.19671e-20	0.231171	2.26867e+06	0.00243964	0.613113	0.362893
BSPH1	19	47468046	48492170	6348.63	0.149845	6276.91	0.150869	19.6497	0.190364	3.44186e-20	0.0900601	1.45472e+06	0.248969	0.312327	0.239385
BSPRY	9	112849541	113871233	6130.37	0.196245	6127.63	0.218595	25.7812	0.782114	2.45851e-20	0.759837	2.09205e+06	0.288513	2.56382	0.961245
BST1	4	15203065	16238313	5059.72	0.112947	5230.7	0.11195	28.2857	0.130794	1.74416e-20	0.49756	1.11626e+06	0.145341	0.0111817	0.0382061
BST2	19	16902939	17905630	11999.6	0.00825244	11680.3	0.00696852	60.0618	0.039047	4.38992e-20	0.0272578	594526	0.696283	2.05262	0.818315
BSX	11	122477570	123481834	3949.83	0.59193	3959.75	0.608449	13.9899	0.59989	1.44724e-20	0.87868	1.4556e+06	0.107876	0.0108275	0.0375712
BTAF1	10	91423770	92531437	3808	0.178159	3763.52	0.176532	1.7659	0.908174	6.79622e-21	0.547417	1.44558e+06	0.220399	0.898636	0.464519
BTBD1	15	82516423	83567252	1317.43	0.913299	1345.01	0.917567	2.75606	0.971536	6.36849e-21	0.881225	1.10264e+06	0.199056	4.13559	1.37685
BTBD10	11	12888008	13963297	2846.46	0.734596	2921.96	0.710172	15.6092	0.741411	1.73327e-20	0.665248	618458	0.347266	0.423947	0.288215
BTBD16	10	121771296	122838159	13053.4	0.00805547	13191.2	0.0069348	35.2294	0.0563674	3.66078e-20	0.0624415	1.15161e+06	0.27629	0.253494	0.211389
BTBD17	17	73856416	74861868	5777.27	0.691059	5700.05	0.702695	35.7582	0.0937014	3.89886e-20	0.125531	1.7212e+06	0.0336463	0.363964	0.262558
BTBD18	11	57243514	58252675	1676.51	0.46052	1604.66	0.502842	5.5603	0.531607	1.22965e-20	0.290436	1.13538e+06	0.0899651	2.02381	0.810088
BTBD19	1	44308523	45315585	8974.12	0.0306626	9401.28	0.027749	34.9481	0.00519165	1.86539e-20	0.300976	1.19497e+06	0.0580739	0.442031	0.295726
BTBD2	19	1485438	2534881	6864.79	0.41714	7027.68	0.419517	37.2587	0.245178	3.96955e-20	0.191648	1.72374e+06	0.00479537	0.296258	0.231926
BTBD3	20	11390723	12426609	2275.1	0.722685	2299.42	0.744561	22.5155	0.457132	1.80255e-20	0.419369	948610	0.605719	0.788595	0.426519
BTBD6	14	104748533	105751093	31862.6	0.000369533	32250.6	0.00031794	154.454	0.00016834	1.04406e-19	7.01901e-07	2.15394e+06	0.00526336	2.20062	0.860262
BTBD7	14	92737550	93833092	28698.4	6.59571e-10	28493.2	4.41272e-10	15.3318	0.73865	2.3428e-20	0.184342	1.2315e+06	0.258585	1.54858	0.670917
BTBD8	1	91580305	92684725	3360.91	0.397448	3756.03	0.332388	47.3742	0.138189	1.83871e-20	0.402929	1.12019e+06	0.194184	1.03796	0.511033
BTBD9	6	37668451	39140148	3731.96	0.856539	3800.35	0.85219	9.33316	0.85091	1.19388e-20	0.943678	838523	0.515876	0.0420173	0.0769702
BTC	4	74244759	75294523	3062.17	0.548641	3235.36	0.508269	16.7489	0.442065	1.91717e-20	0.101282	639640	0.506854	1.71755	0.721227
BTD	3	15101341	16222311	3401.56	0.171513	3922.36	0.11433	46.9317	0.00300157	3.37193e-20	0.010102	3.05232e+06	0.0280822	0.00809946	0.0323165
BTF3	5	72998408	74005667	4178.94	0.208859	4571.37	0.169946	120.77	0.00175682	3.41636e-20	0.0468144	1.07527e+06	0.344539	0.14961	0.15558
BTF3L4	1	51556199	52590716	12485.7	0.000302378	12280.1	0.000407237	2.25009	0.656085	4.41905e-21	0.269782	1.4514e+06	0.142829	1.29575	0.593474
BTG1	12	91640278	92645846	2997.08	0.929995	3209.43	0.920707	26.4651	0.410472	1.32089e-20	0.855644	2.05734e+06	0.0120987	2.13123	0.840659
BTG2	1	202805491	203809602	7355.25	0.287427	7577.82	0.24329	30.6315	0.163318	3.02356e-20	0.299188	1.16162e+06	0.198646	0.613205	0.362927
BTG3	21	17093653	18112945	6411.48	0.372436	6339.14	0.38143	21.8144	0.693506	1.91396e-20	0.587162	465488	0.626493	0.0127564	0.040923
BTG4	11	110967526	112014367	12916.4	0.00315536	13288.4	0.00278498	21.4864	0.108569	1.21692e-20	0.350097	1.15509e+06	0.0553091	3.8186	1.29511
BTLA	3	111963966	112999472	11662	0.0908138	11961.5	0.0676576	33.3923	0.177698	4.84005e-20	0.00162047	1.13807e+06	0.524367	2.09705	0.830962
BTN1A1	6	26000303	27010425	3209.47	0.0820282	3300.44	0.0680216	20.3955	0.12844	7.28991e-21	0.274934	802537	0.697373	0.124734	0.140288
BTN2A1	6	25957904	26976621	3104.68	0.0872624	3242.06	0.0705442	13.6573	0.192806	6.52337e-21	0.318104	1.20532e+06	0.237641	0.0221291	0.0546574
BTN2A2	6	25883096	26894874	2689.81	0.10508	2744.06	0.086756	9.86427	0.263451	6.30571e-21	0.331429	1.80999e+06	0.23831	0.237884	0.203607
BTN3A1	6	25902237	26915208	2689.81	0.10508	2744.06	0.086756	9.86427	0.263451	6.30571e-21	0.331429	1.93133e+06	0.187347	6.83301	2.04823
BTN3A2	6	25865159	26878320	2691.19	0.105583	2746.56	0.0875606	10.0292	0.295145	6.51759e-21	0.408616	2.00761e+06	0.149422	0.00792203	0.0319482
BTN3A3	6	25940472	26953415	2689.81	0.10508	2744.06	0.086756	9.86427	0.263451	6.30571e-21	0.331429	1.98401e+06	0.16137	2.40543	0.917519
BTNL2	6	31893339	32907181	7174.18	0.0281835	7255.07	0.0357608	60.9278	0.257123	8.77348e-20	0.13522	2.03828e+06	0.148918	1.03052	0.508587
BTNL3	5	180488846	181506727	5440.86	0.127856	5163.62	0.180681	21.0011	0.0462482	2.01689e-20	0.0892412	1.95829e+06	0.167909	1.06315	0.519279
BTNL8	5	180399077	181450906	6328.39	0.134418	6011.02	0.186618	23.7575	0.0438703	2.33429e-20	0.083137	1.18171e+06	0.502583	0.00886561	0.0338657
BTNL9	5	180540225	181561521	5426.06	0.128646	5128.5	0.183148	16.6808	0.0500058	1.95848e-20	0.0960843	464923	0.482118	0.789741	0.426921
BTRC	10	100854033	102057321	2843.59	0.407263	2671.15	0.447203	20.999	0.231327	2.24252e-20	0.309624	431606	0.558501	1.08461	0.526268
BUB1	2	110137528	111178063	391.722	0.754014	319.084	0.814844	6.36626	0.233272	3.84747e-21	0.709505	478038	0.420371	2.46817	0.934896
BUB1B	15	39661023	40721123	4546.47	0.553351	4342.82	0.594585	26.068	0.291392	1.67624e-20	0.525532	762034	0.560602	1.15802	0.54994
BUB1B-PAK6	15	39718500	40764890	4515.87	0.472223	4313.72	0.517391	26.0479	0.263293	1.67555e-20	0.430776	1.74305e+06	0.0186295	0.322698	0.244132
BUB3	10	122654402	123670467	6664.52	0.385224	6612.46	0.367603	66.158	0.0145387	3.42787e-20	0.0225381	1.4673e+06	0.339935	4.28202	1.41434
BUD13	11	116248170	117272987	3108.93	0.713202	3027.83	0.709524	12.8761	0.981046	1.70679e-20	0.889609	1.28361e+06	0.546901	0.0294287	0.0635904
BUD23	7	73183597	74198212	4653.05	0.271252	4836.46	0.243182	10.9218	0.574467	1.0766e-20	0.549392	1.07489e+06	0.252462	2.29679	0.887254
BUD31	7	98908641	99919616	7011.76	0.00339356	7034.09	0.00428103	3.53739	0.683626	5.48183e-21	0.244706	1.74008e+06	0.0316243	0.718976	0.401779
BVES	6	104596822	105637157	6844.85	0.135517	6544.9	0.163271	22.4574	0.111965	8.57304e-21	0.272135	2.05116e+06	0.0179212	0.00614223	0.028014
BYSL	6	41421499	42433046	5416.77	0.639419	5637.67	0.606576	27.8737	0.337104	1.93478e-20	0.925051	1.35238e+06	0.0566966	0.0772773	0.107337
BZW1	2	200310594	201327338	4605.35	0.164854	4783.76	0.161466	25.933	0.339804	2.43157e-20	0.136516	1.2369e+06	0.241486	2.54958	0.957331
BZW2	7	16146131	17206523	3917.17	0.960415	4132.63	0.954638	32.4251	0.685497	4.1655e-20	0.176257	1.58037e+06	0.0388201	1.4897	0.653134
C10orf105	10	71211701	72237824	8123.06	0.0299736	7926.77	0.032039	44.0678	0.087233	3.84086e-20	0.121581	151154	0.659347	0.145581	0.153172
C10orf120	10	122197709	123199846	6250.59	0.291167	6197.64	0.300954	49.0328	0.000884791	3.42574e-20	0.0011903	2.25643e+06	0.0156909	8.08482	2.3503
C10orf143	10	129520025	130610830	4373.81	0.897409	4499.72	0.893151	28.3694	0.42801	3.45511e-20	0.241116	1.82297e+06	0.0380415	0.523357	0.328445
C10orf53	10	49179651	50210261	21442.9	7.05499e-06	21152.1	7.27865e-06	34.5056	0.318889	2.35668e-20	0.0738008	808438	0.361743	0.143957	0.152194
C10orf62	10	97089721	98090934	4621.85	0.29568	4451.71	0.281834	8.70551	0.761448	1.11102e-20	0.870287	965245	0.787391	0.00392558	0.0222573
C10orf67	10	22702696	23844845	8598.5	0.00187143	8684.1	0.00181707	11.1598	0.138077	1.37674e-20	0.0787981	1.38249e+06	0.254611	2.73574	1.00821
C10orf71	10	48799170	49827492	12376.5	0.0695258	12555.6	0.0591739	35.8291	0.13416	2.16939e-20	0.228073	730907	0.087802	0.359206	0.260469
C10orf82	10	116163696	117170264	19308.9	0.000220131	18897	0.000242907	72.2482	0.00982424	4.1117e-20	0.0207945	1.40413e+06	0.4167	1.95876	0.791434
C10orf88	10	122430901	123454311	6284.36	0.242267	6199.31	0.246972	46.3508	0.00060105	3.38686e-20	0.000698983	1.69393e+06	0.109347	0.135386	0.146964
C10orf90	10	125924997	127298708	9421.09	0.534833	9300.74	0.546068	26.156	0.953735	2.67455e-20	0.959685	1.57799e+06	0.0524531	3.03544	1.08903
C10orf95	10	101949837	102951543	1335.8	0.752062	1233.77	0.776814	7.14519	0.195572	4.02122e-21	0.448635	1.0029e+06	0.260944	0.367062	0.263914
C11orf16	11	8420076	9433006	3175.39	0.19764	3083.2	0.204764	12.443	0.570549	1.25411e-20	0.768454	751080	0.779852	1.08795	0.527351
C11orf21	11	1795628	2803049	7977.75	0.56315	8188.06	0.534702	25.2594	0.844329	3.20601e-20	0.77184	522001	0.667477	0.403339	0.279535
C11orf24	11	67761338	68772001	6202.73	0.190683	6232.14	0.191787	26.2573	0.221733	1.81037e-20	0.2562	1.31131e+06	0.249812	0.616478	0.364155
C11orf42	11	5705557	6711135	8242.18	0.340289	8307.1	0.328039	36.3863	0.536382	3.16132e-20	0.457545	2.11483e+06	0.00976198	0.0355126	0.0703126
C11orf52	11	111418032	112426871	17990.1	2.14679e-05	18490.1	1.16989e-05	15.8428	0.185849	5.59966e-21	0.849299	1.34536e+06	0.263135	0.0694729	0.101217
C11orf54	11	93241591	94264749	2478.03	0.0737737	2771.34	0.073792	14.5284	0.254645	1.34386e-20	0.363482	1.69437e+06	0.229773	1.38432	0.620936
C11orf58	11	16113132	17258340	4064.92	0.262377	3997.45	0.279359	12.2368	0.530863	7.05593e-21	0.926673	724439	0.429213	1.88853	0.77117
C11orf65	11	107808519	108967531	2258.81	0.625466	2211.4	0.628696	4.11586	0.959967	7.8017e-21	0.625022	795356	0.416679	1.51581	0.661038
C11orf68	11	65416810	66419062	3463.71	0.180563	3350.42	0.182838	6.97839	0.614911	5.96054e-21	0.663176	2.28431e+06	0.0205114	1.91321	0.778307
C11orf71	11	113891443	114900511	9670.66	0.123117	9885.54	0.106378	20.6003	0.569716	3.25568e-20	0.241172	1.3239e+06	0.100068	0.0174098	0.048164
C11orf80	11	66244451	67343516	4699.66	0.0815812	4775	0.0697552	4.37894	0.595829	1.94838e-21	0.963614	1.04813e+06	0.32765	0.0568127	0.0906546
C11orf86	11	66475277	67477009	4327.13	0.0375054	4459.57	0.0323759	1.69828	0.54025	1.64378e-21	0.788796	1.34459e+06	0.0506267	1.63854	0.69783
C11orf87	11	108922190	109929167	14223.3	4.17953e-05	15047.3	2.00673e-05	30.2574	0.00266548	1.15185e-20	0.23258	2.29782e+06	0.0274892	0.0890868	0.116145
C11orf91	11	33198261	34200826	7347.14	0.0162499	7136.49	0.0161653	11.745	0.560007	2.46322e-20	0.0518318	2.18962e+06	0.03379	3.3961	1.18475
C11orf96	11	43442637	44443878	4862.4	0.575569	5063.46	0.559849	11.1718	0.847893	1.81106e-20	0.553834	652681	0.133966	0.606987	0.360589
C11orf97	11	94012461	95032123	4229.99	0.107111	4231.21	0.111117	8.53025	0.451989	1.08671e-20	0.291542	1.27377e+06	0.216985	0.788796	0.426589
C11orf98	11	62162817	63165210	12211.9	0.00420687	12666.7	0.00265888	25.3465	0.175549	2.38333e-20	0.227584	1.44956e+06	0.415649	1.82423	0.752493
C12orf29	12	87533846	88550160	1226.83	0.812502	1183.67	0.824139	10.034	0.426975	1.32992e-20	0.540646	1.21898e+06	0.0926823	0.173742	0.169535
C12orf4	12	3987735	5038508	10797.8	0.375663	10905.4	0.382868	41.8832	0.255097	4.27331e-20	0.317837	1.32058e+06	0.105026	0.689007	0.390937
C12orf40	12	39126167	40408300	3015.49	0.258957	3136.16	0.29001	21.2496	0.343934	1.80855e-20	0.204484	2.75303e+06	0.0257841	0.00360789	0.0213159
C12orf42	12	102737591	103995978	1845.67	0.944126	1851.43	0.954453	45.5806	0.0821781	1.69332e-20	0.682269	1.95828e+06	0.12397	0.485533	0.313429
C12orf43	12	120500486	121516502	4928.41	0.521838	5104.97	0.497958	19.1641	0.0841398	1.62802e-20	0.401283	2.38164e+06	0.0709999	0.897274	0.464056
C12orf50	12	87480035	88534037	1227.56	0.835589	1184.28	0.843212	10.04	0.472893	1.33089e-20	0.593471	1.46197e+06	0.0910521	0.796007	0.429119
C12orf54	12	47982498	48996524	1286.52	0.352647	1336.25	0.341442	11.2217	0.84613	1.44632e-20	0.220543	1.15577e+06	0.390512	0.124949	0.140425
C12orf56	12	63764762	64890758	9033.62	0.0356662	9222.71	0.038433	12.6743	0.333427	1.5223e-20	0.246435	2.77712e+06	0.0257009	0.00109024	0.0115928
C12orf57	12	6442978	7446003	10090.1	0.0784378	10209	0.0867321	33.0035	0.417093	3.23162e-20	0.244023	1.49658e+06	0.114734	0.826033	0.439589
C12orf60	12	14303666	15406586	4612.49	0.142814	4454.8	0.153778	7.7353	0.297704	1.68612e-20	0.0702799	2.5706e+06	0.0707949	4.13891	1.3777
C12orf71	12	26581057	27582578	3554.03	0.572254	3515.77	0.578392	14.9194	0.802839	1.74439e-20	0.628335	1.1981e+06	0.557566	0.108788	0.129872
C12orf75	12	104735290	105896097	2211.26	0.498346	2396.89	0.478216	34.7021	0.350738	1.2173e-20	0.479582	1.21234e+06	0.3143	0.492686	0.316294
C12orf76	12	109527028	110573636	1142.31	0.535601	1198.21	0.505567	6.43698	0.762535	5.702e-21	0.720108	1.3641e+06	0.825114	1.09227	0.528754
C13orf42	13	50582119	51700252	4579.91	0.643756	4686.33	0.640092	19.7617	0.316263	1.70704e-20	0.460741	1.25487e+06	0.247095	1.21813	0.569073
C13orf46	13	113453705	114474076	2462.12	0.604721	2390.3	0.613216	14.2921	0.432014	1.47952e-20	0.205098	920502	0.0175883	0.20296	0.185525
C14orf119	14	22595505	23600456	9444.81	0.0713386	9012.5	0.0969385	34.4273	0.0956281	3.12273e-20	0.312292	1.51249e+06	0.258708	0.935426	0.47696
C14orf132	14	95539362	96593971	5317.64	0.407373	5693.35	0.361417	60.5322	0.0410925	2.66483e-20	0.456137	745966	0.523759	0.544984	0.336889
C14orf180	14	104079764	105090515	6324.77	0.236539	6758.18	0.19543	70.8456	0.00334762	5.32242e-20	0.000593111	1.15043e+06	0.269519	4.46387	1.46069
C14orf28	14	44397275	45407257	1081.56	0.595077	1145.25	0.601934	6.46436	0.487601	1.2418e-20	0.150488	1.16301e+06	0.286434	0.28794	0.228013
C14orf39	14	59896469	61015543	10689.2	0.0102962	10524.9	0.0107918	19.225	0.0337851	1.91311e-20	0.00178474	953862	0.279553	0.889995	0.461579
C14orf93	14	22485894	23510166	10009.6	0.109075	9575.14	0.152069	37.7975	0.0556966	3.84629e-20	0.335317	1.05776e+06	0.496987	2.36733	0.906933
C15orf39	15	74695643	75712169	4950.89	0.0981238	4924.72	0.098935	7.08088	0.720638	8.41771e-21	0.607244	1.36306e+06	0.350367	0.238775	0.204056
C15orf40	15	82488441	83511641	1157.02	0.762388	1302.7	0.708256	15.995	0.00616818	8.97631e-21	0.475698	1.42756e+06	0.227303	2.62045	0.976771
C15orf48	15	44930579	45948761	4583	0.065732	4430.7	0.0683728	47.9972	0.0019131	3.64811e-20	0.00691331	1.1696e+06	0.281812	1.63827	0.697748
C15orf61	15	67021131	68030146	6405.3	0.00904684	6294.43	0.00910697	13.8094	0.603703	1.429e-20	0.332125	1.19685e+06	0.263535	2.28671	0.884434
C15orf62	15	40269980	41272449	2507.12	0.680878	2507.73	0.690601	27.8096	0.100776	1.25911e-20	0.391448	1.1456e+06	0.398009	3.92345	1.32224
C16orf46	16	80553497	81577267	9343.37	0.299603	9582.65	0.29089	50.3432	0.226052	2.6782e-20	0.51076	2.24256e+06	0.0878581	1.33082	0.604395
C16orf54	16	29242463	30245990	6028.12	0.00431862	5925.01	0.00476843	3.3175	0.80233	3.62447e-21	0.930632	1.00235e+06	0.457425	2.00098	0.803554
C16orf74	16	85190084	86251129	13741.7	0.193914	13617.9	0.202457	73.3721	0.414747	6.42395e-20	0.46593	911238	0.750715	0.0391563	0.0741007
C16orf78	16	48873804	49899431	2777.02	0.610057	2878.01	0.577183	10.0843	0.56726	1.42041e-20	0.48383	2.96321e+06	0.00586879	0.591353	0.354679
C16orf82	16	26566927	27569166	8535.72	0.721487	8607.55	0.721567	14.7036	0.965966	2.66898e-20	0.74288	1.49343e+06	0.039261	0.187018	0.17691
C16orf86	16	67166814	68168757	43.4821	1	46.1214	1	0.0931921	0.9015	9.92556e-23	1	1.38586e+06	0.20585	0.211637	0.190112
C16orf87	16	46296603	47331180	22443	4.7061e-06	21033.7	8.08849e-06	102.098	8.27136e-05	3.21426e-20	0.000792746	1.37528e+06	0.836331	0.0875922	0.115057
C16orf89	16	4544122	5566110	12113.5	0.106925	11458.1	0.144974	48.6059	0.527176	2.60896e-20	0.984159	1.78676e+06	0.0904752	0.475714	0.309476
C16orf90	16	2993484	3995489	15423.2	0.000720242	16388.1	0.000505464	23.4478	0.180508	9.83182e-21	0.745422	980295	0.122594	1.18664	0.559078
C16orf92	16	29523198	30527736	6886.21	0.00505758	6764.66	0.00542362	7.82246	0.361775	1.44723e-20	0.262658	1.8226e+06	0.0845348	0.171229	0.168116
C16orf95	16	86583562	87817420	14000.9	0.450745	14188.7	0.459699	32.2084	0.955621	4.54167e-20	0.577124	1.53604e+06	0.847352	2.13724	0.842361
C16orf96	16	4056340	5100758	10563.2	0.0335331	9994.9	0.0447631	31.1393	0.674746	1.49177e-20	0.993694	1.60704e+06	0.269409	0.0355572	0.07036
C17orf100	17	6151762	7193202	6666.08	0.323153	6516.58	0.325311	33.9785	0.175615	2.25728e-20	0.596561	1.43733e+06	0.298144	0.170287	0.167582
C17orf107	17	4399418	5402934	16026.3	0.00335418	16372.8	0.00348663	28.1543	0.774925	3.96936e-20	0.310179	1.824e+06	0.131255	0.22271	0.195872
C17orf113	17	41538232	42550601	3058.85	0.477641	3220.35	0.443888	12.1348	0.59419	1.34974e-20	0.458963	1.62772e+06	0.355016	0.0366453	0.0715073
C17orf114	17	4301159	5307013	16608.6	0.00268932	16965.1	0.00269669	28.177	0.760626	4.0454e-20	0.327186	1.9321e+06	0.0840897	0.0648235	0.0974377
C17orf49	17	6514495	7517525	4753.75	0.466933	4669.86	0.456748	22.027	0.297184	1.2174e-20	0.84833	1.1996e+06	0.119537	0.392217	0.274794
C17orf50	17	35260887	36265079	1883.04	0.67502	2012.91	0.64931	8.8635	0.766402	8.95011e-21	0.719049	2.00241e+06	0.0745553	0.567268	0.34549
C17orf58	17	67491099	68496469	9606.01	0.00384215	10150.9	0.00250923	22.897	0.0696221	1.42391e-20	0.634869	1.22955e+06	0.534327	0.586515	0.352842
C17orf67	17	56291913	57338773	3855.89	0.745493	3843.93	0.754836	17.276	0.53764	1.64685e-20	0.921975	1.44964e+06	0.0270729	0.134714	0.146549
C17orf75	17	31824565	32850023	1906.71	0.536964	1815.49	0.548765	18.6823	0.113564	1.12509e-20	0.332268	1.36248e+06	0.18604	0.221886	0.195447
C17orf80	17	72732233	73748959	7445.49	0.851962	7676.26	0.844435	43.6434	0.240627	3.89739e-20	0.321588	1.08639e+06	0.178733	0.563907	0.344199
C17orf97	17	1	931062	9171.14	0.582099	9065.07	0.587854	25.6298	0.674338	3.44286e-20	0.395029	1.15278e+06	0.436644	0.000691678	0.00920922
C17orf98	17	38335086	39341438	1525.06	0.479868	1570.88	0.497175	15.2172	0.445234	8.75817e-21	0.503534	1.96164e+06	0.0061053	0.104246	0.1268
C17orf99	17	77646385	78666297	5444.49	0.544816	5497.51	0.555539	57.9738	0.0051142	5.58734e-20	0.0551556	1.98671e+06	0.0588564	2.20518	0.861546
C18orf15	18	12739543	13742076	7257.01	0.606197	7355.46	0.60881	32.7765	0.553884	3.35454e-20	0.322298	2.00286e+06	0.00162927	0.614023	0.363234
C18orf21	18	35472625	36479286	20445.2	3.91088e-06	20661.5	3.20415e-06	12.3561	0.642075	1.37742e-20	0.777572	2.18886e+06	0.107959	0.84324	0.445545
C18orf25	18	45673553	46766992	4300.27	0.643096	4220.9	0.645394	19.7388	0.800827	2.03169e-20	0.67849	1.24072e+06	0.575244	0.901687	0.465555
C18orf32	18	48977243	49987252	5805.65	0.0339571	5851.01	0.0337053	15.1871	0.0265382	1.87998e-20	0.302074	1.64723e+06	0.0126067	8.41291	2.4288
C18orf54	18	53857906	54885218	1896.65	0.48333	2008.36	0.496845	8.12643	0.794866	7.73513e-21	0.74151	1.72532e+06	0.0383878	0.290895	0.229407
C18orf63	18	73815839	74859189	14802.1	0.0454366	14891.2	0.0435687	36.9126	0.487012	3.92286e-20	0.245661	1.07456e+06	0.156604	0.677522	0.386749
C19orf12	19	29198937	30215789	5111.04	0.216742	5446.35	0.224714	17.3358	0.660724	2.48481e-20	0.401878	1.22607e+06	0.288387	0.0183895	0.0495712
C19orf18	19	57458437	58474534	1241.31	0.804973	1291.22	0.793863	6.40941	0.94655	7.3826e-21	0.906619	3.07118e+06	0.0315055	0.753939	0.414278
C19orf25	19	961143	1979219	7667.7	0.422896	8009.19	0.395807	39.6016	0.420647	4.02088e-20	0.247074	1.26037e+06	0.0604613	0.286973	0.227556
C19orf33	19	37804164	38805006	940.864	0.848508	996.492	0.840017	10.4294	0.782802	9.26044e-21	0.539605	3.06884e+06	0.00477324	0.00127144	0.0125323
C19orf38	19	10336575	11369790	5931.98	0.197175	5396.61	0.271212	31.9518	0.0415562	1.20803e-20	0.659981	1.35579e+06	0.0466585	0.00801707	0.0321459
C19orf44	19	15996394	17021352	10286.4	0.000101954	10289.9	0.000132542	43.355	0.103701	2.18648e-20	0.0868841	2.19842e+06	0.0103667	0.368987	0.264755
C19orf47	19	39819536	40848527	702.491	0.985673	765.059	0.98263	14.4948	0.533803	7.3138e-21	0.847485	2.43222e+06	0.00688188	4.09286	1.36588
C19orf53	19	13274456	14278773	2760.69	0.786899	2620.99	0.794773	13.2108	0.870245	1.65341e-20	0.639239	1.76073e+06	0.0590568	1.26268	0.58312
C19orf67	19	13581624	14585875	3157.55	0.754522	3002.28	0.751576	16.7227	0.928739	1.59192e-20	0.698461	2.03574e+06	0.0231183	0.383995	0.271262
C19orf73	19	48618402	49619143	7689.47	0.211639	8101.1	0.18136	32.3734	0.283486	2.81415e-20	0.0789669	1.11751e+06	0.767931	0.213477	0.191077
C19orf81	19	50149445	51159310	9733.48	0.218153	9980.72	0.203983	41.7121	0.865866	4.50779e-20	0.501299	1.60773e+06	0.0295436	3.37439	1.17903
C19orf84	19	50888289	51890591	7180.29	0.2762	7447.52	0.256511	33.4627	0.240434	4.37737e-20	0.349805	1.30246e+06	0.255224	0.929436	0.474943
C19orf85	19	54963001	55964751	6377.73	0.682953	6442.62	0.668755	20.7085	0.435051	6.00471e-20	0.0268032	1.37259e+06	0.184493	4.35463	1.43287
C1D	2	67541130	68610948	5401.41	0.0308022	5383.24	0.0331406	14.0998	0.513509	1.16516e-20	0.743018	2.01329e+06	0.0121191	0.270765	0.219813
C1GALT1	7	6656934	7748616	4634.72	0.54231	4847.56	0.558598	25.962	0.488573	4.68595e-20	0.0136058	957249	0.720549	0.388581	0.273235
C1GALT1C1L	2	43175151	44176429	2380.32	0.419864	2514.7	0.384665	30.8301	0.265305	1.92717e-20	0.271584	1.34265e+06	0.527667	0.524027	0.328708
C1orf100	1	243852635	244889663	15498.7	0.000423832	15274.3	0.00064515	26.8815	0.584032	2.90108e-20	0.334565	1.33206e+06	0.219001	0.86774	0.453974
C1orf105	1	171920685	172968831	4161.38	0.261829	4046.71	0.286318	14.1325	0.318851	1.06818e-20	0.618528	1.59326e+06	0.352299	0.712027	0.399276
C1orf109	1	37181570	38192249	3821.7	0.694659	3705.73	0.723241	21.2592	0.316989	9.02985e-21	0.965801	1.82197e+06	0.275715	0.034576	0.0693122
C1orf112	1	169162007	170354080	1277.04	0.938297	1456.67	0.915191	20.7036	0.166652	1.20446e-20	0.474552	904790	0.00399778	2.29438	0.886582
C1orf115	1	220190363	221199153	2107.03	0.832268	2194.57	0.826306	12.711	0.738	1.91137e-20	0.46546	203892	0.543091	0.311706	0.239099
C1orf116	1	206518522	207532756	3147.54	0.328611	3331.04	0.311222	17.2064	0.540491	1.29272e-20	0.613715	1.60549e+06	0.0146166	0.870553	0.454938
C1orf122	1	37306979	38309454	4116.86	0.730736	3997.98	0.749581	22.4153	0.355879	1.13286e-20	0.960522	485601	0.454587	3.37066	1.17805
C1orf127	1	10446471	11482076	3532.3	0.796564	3605.26	0.792049	16.1921	0.604323	1.33577e-20	0.667863	83334.6	0.198361	0.207462	0.187913
C1orf131	1	230723763	231741187	6698.27	0.225599	6927.97	0.201253	20.2678	0.28141	1.71128e-20	0.495808	61649.4	0.0402621	0.174995	0.170239
C1orf141	1	66592165	67731853	3963.54	0.490466	3921.03	0.515381	19.2598	0.512192	2.40444e-20	0.170059	1.99661e+06	0.00207366	0.624724	0.367242
C1orf146	1	91717915	92745813	2763.65	0.35878	3119.74	0.308896	41.9337	0.148314	1.2189e-20	0.461257	1.64177e+06	0.0842694	0.270645	0.219755
C1orf159	1	581818	1616361	13127.2	0.0660436	12964	0.0710712	40.4015	0.0264316	2.16145e-20	0.531061	31105	0.957282	0.0532422	0.0875044
C1orf162	1	110973792	111978512	6330.84	0.309679	6569	0.316572	16.933	0.890498	2.02905e-20	0.759289	2.18871e+06	0.0670662	2.97152	1.0719
C1orf167	1	11261787	12289585	5655.5	0.473296	5709.51	0.482477	9.86739	0.845796	1.52509e-20	0.832501	521276	0.623359	0.0440234	0.0789329
C1orf174	1	3389125	4400293	9267.45	0.429405	9250.25	0.456277	25.8292	0.79438	3.13419e-20	0.834792	2.17595e+06	0.0126687	0.809913	0.43398
C1orf185	1	50602221	51648086	4482.97	0.0054878	4485.11	0.00611612	0.728731	0.802523	1.32233e-21	0.345813	790758	0.687566	0.00059587	0.00854123
C1orf198	1	230337119	231369589	5968.04	0.379371	6426.15	0.350687	25.0636	0.699078	2.2227e-20	0.648477	1.23235e+06	0.264868	0.313387	0.239872
C1orf21	1	183887029	185129019	2724.15	0.142725	2688.28	0.164815	4.66462	0.810487	9.12388e-21	0.442441	1.40811e+06	0.847566	0.0713325	0.102699
C1orf210	1	42781877	43785617	2890.87	0.642798	3040.29	0.608816	20.5842	0.51132	8.83591e-21	0.880214	1.429e+06	0.268338	1.49131	0.65362
C1orf216	1	35213877	36218894	728.586	0.77339	790.487	0.75454	4.12506	0.46187	7.68943e-21	0.117756	20123.2	0.926259	0.45373	0.300536
C1orf226	1	161878841	162886812	9489.88	0.140996	9735.84	0.142012	21.1907	0.381388	2.39703e-20	0.163686	198618	0.299302	0.806558	0.432809
C1orf232	1	25664101	26668963	6465.09	0.103863	6184.14	0.101918	16.5596	0.260695	1.15265e-20	0.684482	1.67208e+06	0.171675	1.01196	0.50247
C1orf35	1	227600726	228605411	1824.68	0.723415	2244.77	0.58465	46.1209	0.00457812	8.13398e-21	0.637127	1.02752e+06	0.247393	0.781846	0.424146
C1orf43	1	153706696	154720637	22108.4	1.41581e-07	23684	1.18404e-07	33.9546	0.02106	1.78952e-20	0.205623	404619	0.413378	1.20557	0.565093
C1orf50	1	42267245	43279491	3549.66	0.384436	3740.49	0.342079	11.9504	0.678071	1.38004e-20	0.642264	2.09079e+06	0.0357954	0.424095	0.288277
C1orf52	1	84749953	85759672	5088.39	0.349881	5180.65	0.351031	18.4147	0.506601	2.27158e-20	0.472575	80604.9	0.31023	0.450093	0.299045
C1orf53	1	197402630	198407367	2605.56	0.115332	2650.23	0.108467	9.69129	0.295534	1.32322e-20	0.292907	586924	0.20113	3.21322	1.13641
C1orf54	1	149768200	150780916	2006.45	0.60417	1995.76	0.627097	6.62204	0.734627	3.10678e-21	0.646422	1.42079e+06	0.114754	1.18787	0.559469
C1orf56	1	150547751	151551986	3432.38	0.670686	3492.69	0.67552	15.2828	0.573869	5.42339e-21	0.843653	1.56241e+06	0.0381631	0.00227016	0.0168257
C1orf68	1	152219522	153220470	1201.18	0.276067	1266.72	0.247203	4.4015	0.667194	5.21587e-21	0.343684	64241.9	0.489026	0.673158	0.385153
C1orf74	1	209279208	210284559	4617.93	0.317081	4699.41	0.344664	13.8598	0.382174	2.61239e-20	0.139318	1.44378e+06	0.0123125	3.29258	1.15743
C1orf87	1	59487269	60573770	1048.28	0.909456	1119.01	0.883394	2.53092	0.954939	3.85403e-21	0.899889	1.72285e+06	0.0253355	0.190958	0.179063
C1orf94	1	33666883	34719131	3354.99	0.670178	3184.07	0.710802	13.6758	0.77508	1.71857e-20	0.738022	491135	0.0274798	1.89609	0.773358
C1QA	1	22135077	23139678	5370.27	0.227326	5574.33	0.233715	15.5396	0.942704	2.88115e-20	0.406541	60833.7	0.365137	1.27848	0.588073
C1QB	1	22152762	23161637	5172.35	0.191305	5345.9	0.198965	14.2947	0.955449	2.20394e-20	0.673802	2.10809e+06	0.125665	7.02332	2.09445
C1QBP	17	4932777	5948830	5872.61	0.2232	6130.62	0.193702	25.1579	0.542406	2.00138e-20	0.493298	2.15023e+06	0.00726495	2.48072	0.938362
C1QC	1	22143014	23148110	5320.23	0.174418	5521.81	0.178976	15.5099	0.940089	2.8807e-20	0.405446	1.95907e+06	0.0738824	0.0140387	0.0430236
C1QL1	17	44459693	45468303	2976.54	0.237316	2800.6	0.280741	8.70484	0.831994	8.21941e-21	0.905459	1.96878e+06	0.0751634	0.0265436	0.0601914
C1QL2	2	118656243	119658751	3847.78	0.613886	3956.42	0.654272	33.8373	0.277714	2.91539e-20	0.0117346	1.70912e+06	0.182575	2.38833	0.912772
C1QL3	10	16013734	17021879	1805.27	0.360718	1863.56	0.371465	4.82948	0.967256	1.38574e-20	0.629599	1.95815e+06	0.0745967	2.37582	0.909294
C1QL4	12	48832409	49837188	1527.42	0.399824	1583.97	0.390112	4.3477	0.711155	1.2915e-20	0.0447666	1.06376e+06	0.504582	0.314167	0.240231
C1QTNF1	17	78522814	79549788	17554.2	0.00814141	17381.3	0.0093157	50.0854	0.0500242	7.54037e-20	0.017277	1.49462e+06	0.0408421	0.0068817	0.0297059
C1QTNF12	1	742446	1746722	21018.3	0.00519045	21194.9	0.00508449	51.5966	0.0124065	3.32711e-20	0.209123	2.02368e+06	0.0225074	0.015888	0.0459051
C1QTNF2	5	159847754	160870641	3646.2	0.3914	3640.25	0.36763	5.78465	0.928358	2.34849e-20	0.269807	1.59584e+06	0.131255	0.00555586	0.0266031
C1QTNF3	5	33517858	34543213	18368.8	0.000304918	18709.5	0.000264043	25.0803	0.06157	2.18007e-20	0.016844	1.83029e+06	0.0341325	0.00634484	0.0284866
C1QTNF3-AMACR	5	33487174	34624528	19974.3	0.00073068	20229.2	0.000665935	29.0812	0.0622571	2.71014e-20	0.083507	1.87113e+06	0.0293858	0.00162251	0.0141831
C1QTNF4	11	47089667	48094411	122.578	0.996647	118.157	0.996811	0.654166	0.996853	1.34883e-21	0.985376	375304	0.419484	1.89195	0.772159
C1QTNF5	11	118838942	119840940	6138.06	0.127033	6229.42	0.121519	18.5253	0.0483501	2.07203e-20	0.167455	1.9067e+06	0.00187638	0.840416	0.44457
C1QTNF6	22	36680166	37699385	5293.41	0.428415	5173.58	0.44344	47.1481	0.15139	3.09179e-20	0.367557	2.0387e+06	0.00245815	0.0243716	0.0575241
C1QTNF7	4	14839818	15946167	4721.54	0.0691013	4968.78	0.0682357	49.9073	0.0142432	1.66669e-20	0.265118	925395	0.163203	0.000868333	0.0103314
C1QTNF8	16	588226	1596244	4996.37	0.895273	5143.33	0.87369	14.9039	0.993241	1.18721e-20	0.962943	1.48791e+06	0.0391021	0.42122	0.287074
C1QTNF9	13	23807166	24822535	14538.5	0.105772	14905.9	0.101144	37.8344	0.592261	4.01243e-20	0.44997	1.63057e+06	0.12204	1.90991	0.777352
C1QTNF9B	13	23391099	24397502	6372.54	0.959557	6381.44	0.966239	28.5576	0.932366	3.36491e-20	0.839768	1.35318e+06	0.133223	6.3523	1.93096
C1R	12	6580214	7592540	9920.64	0.106488	10087.7	0.11316	32.2256	0.412531	3.22642e-20	0.170579	2.11959e+06	0.0133705	0.19045	0.178787
C1RL	12	6589587	7609238	9920.64	0.106488	10087.7	0.11316	32.2256	0.412531	3.22642e-20	0.170579	1.81046e+06	0.088041	0.266494	0.217747
C1S	12	6488259	7571032	9924.46	0.107745	10091.7	0.114513	32.2275	0.412811	3.24755e-20	0.206575	1.95464e+06	0.0933926	0.286832	0.227489
C2	6	31397785	32445673	1087.51	0.838503	1149.87	0.817444	18.2394	0.262499	2.20499e-20	0.509956	1.38667e+06	0.440859	0.0610897	0.0943218
C20orf141	20	2314987	3315833	9616.59	0.0185049	9094.66	0.0257891	81.3878	0.000576646	8.13324e-20	0.000615975	1.40599e+06	0.433027	0.133972	0.14609
C20orf144	20	33162327	34165619	1769.23	0.73472	1860.3	0.725148	5.70517	0.634281	2.56893e-21	0.938856	1.42582e+06	0.427977	0.0124581	0.0404205
C20orf173	20	35023186	36029652	1460.45	0.648377	1431.45	0.652503	7.58046	0.601235	5.31088e-21	0.54641	1.02144e+06	0.402626	0.0448694	0.0797491
C20orf181	20	63343436	64343915	12152	0.0922867	12310.9	0.092337	28.0516	0.480305	3.00689e-20	0.187729	1.66823e+06	0.315395	0.00969867	0.0354812
C20orf202	20	703454	1709076	8961.26	0.481182	8976.8	0.499918	27.9392	0.826171	3.55493e-20	0.806143	1.28112e+06	0.213508	0.432238	0.29167
C20orf203	20	32131625	33173941	2008.97	0.453932	1927.61	0.461856	3.93085	0.770334	8.56205e-21	0.331781	1.03525e+06	0.333839	1.89986	0.774447
C20orf204	20	63534344	64539962	8638.28	0.055662	8629.91	0.0548264	20.1631	0.414883	2.16929e-20	0.0866364	1.2928e+06	0.26869	0.587955	0.353389
C20orf85	20	57650902	58661150	3563.3	0.891184	3793.33	0.875215	36.1352	0.198731	2.46485e-20	0.351232	1.86274e+06	0.0237202	2.38369	0.911482
C20orf96	20	1	790778	6934.24	0.187621	6569.85	0.236279	57.8977	0.0247784	4.58509e-20	0.084559	1.31066e+06	0.332594	1.43843	0.637531
C21orf140	21	33900112	34901072	12786.2	0.0023081	12620.5	0.00238191	53.3906	0.0364074	2.49723e-20	0.514597	2.04608e+06	0.150422	0.333153	0.248868
C21orf58	21	45800181	46823875	5432.78	0.545707	5572.95	0.540866	30.7377	0.532789	2.5877e-20	0.554334	1.42901e+06	0.0448218	0.444967	0.296937
C21orf62	21	32290673	33313743	5576.83	0.0616884	5765.32	0.0450195	30.6491	0.025976	4.22342e-20	0.0116865	1.79418e+06	0.00172732	0.462894	0.304278
C21orf91	21	17288974	18319386	9528.91	0.257641	9523.66	0.26296	26.0202	0.762182	2.8347e-20	0.478325	2.29835e+06	0.00408973	1.45318	0.64203
C22orf15	22	23262990	24265863	10991	0.0830844	11381.1	0.075522	35.2772	0.228154	4.23451e-20	0.0919603	1.02889e+06	0.129428	1.13679	0.54313
C22orf23	22	37443050	38453669	2849.69	0.19315	2933.34	0.21061	12.5958	0.662995	9.52448e-21	0.841586	1.33346e+06	0.406587	4.98253	1.59168
C22orf31	22	28558672	29561831	1380.41	0.871816	1391.58	0.881698	14.6861	0.584549	1.07896e-20	0.449099	1.18405e+06	0.477187	0.106635	0.128422
C22orf39	22	18851368	19947711	4291.9	0.695644	4389.01	0.689344	13.9591	0.720259	2.5701e-20	0.583665	1.79546e+06	0.165303	7.01529	2.0925
C22orf42	22	31649006	32659322	1629.33	0.968699	1659.9	0.963067	5.76221	0.938208	1.30953e-20	0.336726	2.37068e+06	0.00472309	1.05353	0.516134
C2CD2	21	41385112	42454018	10315.7	0.233268	10480.3	0.260372	59.9516	0.292194	3.93884e-20	0.8055	2.8626e+06	0.00271118	0.928031	0.474469
C2CD2L	11	118602198	119618544	3612.68	0.118561	3625.18	0.112373	15.8236	0.0358893	1.59069e-20	0.119279	3.07556e+06	0.0288393	0.45675	0.301772
C2CD3	11	73512718	74671210	11714.1	0.000193304	11330.3	0.000184356	22.618	0.203146	1.67413e-20	0.169237	1.15285e+06	0.247269	0.725475	0.404114
C2CD4A	15	61566977	62570917	5058.34	0.15864	5323.16	0.136913	19.1667	0.273507	2.28291e-20	0.427992	1.64378e+06	0.0450904	0.00165455	0.0143248
C2CD4B	15	61663535	62665285	5167.68	0.194132	5485	0.159832	20.3767	0.245648	2.4156e-20	0.343307	1.47558e+06	0.0408413	0.891918	0.462234
C2CD4C	19	1	909147	9771.44	0.25327	9663.21	0.265777	20.0258	0.699447	3.60955e-20	0.405622	2.17575e+06	0.0128892	0.00116829	0.0120062
C2CD4D	1	151337818	152340557	4814.4	0.30311	4807.21	0.301747	22.794	0.34291	1.59513e-20	0.267822	1.3129e+06	0.0203099	1.08243	0.525559
C2CD5	12	21948583	23044546	7416.3	0.175538	7354.25	0.216754	36.297	0.195605	1.53774e-20	0.632146	1.13328e+06	0.0432628	4.0043	1.34309
C2CD6	2	200987421	202119178	8452.53	0.136436	8738.58	0.156965	60.1342	0.163936	3.20128e-20	0.0781096	1.8934e+06	0.00284944	1.42509	0.63345
C2orf15	2	98641707	99651669	1307.81	0.362158	1299.62	0.356058	24.6809	0.0785907	1.21218e-20	0.144652	357175	0.220581	0.383866	0.271207
C2orf16	2	27037386	28082722	821.024	0.85216	798.578	0.855645	0.843048	0.932343	2.09634e-21	0.658693	2.08246e+06	0.086317	1.04494	0.51332
C2orf42	2	69649885	70748615	712.869	0.829266	679.059	0.843587	7.74547	0.828311	3.35375e-21	0.972754	154493	0.772643	4.07939	1.36242
C2orf49	2	104837532	105849211	1048.71	0.982733	1232.3	0.977532	28.3277	0.467308	1.47189e-20	0.832805	1.41723e+06	0.23698	0.13099	0.144234
C2orf50	2	10633128	11651317	7351.93	0.452191	7344.47	0.474671	23.6272	0.617579	2.99497e-20	0.492341	1.78595e+06	0.22616	0.276132	0.222394
C2orf66	2	196304417	197309355	5359.91	0.149105	5350.29	0.160307	7.80459	0.619672	8.11348e-21	0.771948	1.79812e+06	0.203555	0.0265718	0.0602254
C2orf68	2	85105254	86112066	1883.2	0.748018	1836.69	0.777085	5.9217	0.774064	1.03789e-20	0.6474	1.16454e+06	0.221651	0.0447592	0.0796432
C2orf69	2	199411293	200455935	4691.88	0.396531	4932.97	0.345521	30.5168	0.0711187	1.79421e-20	0.296102	1.35807e+06	0.227604	0.382022	0.270411
C2orf72	2	230537523	231549719	1662.17	0.820104	1688.33	0.843283	6.4423	0.949178	6.04415e-21	0.972717	337524	0.152875	0.333264	0.248918
C2orf73	2	53830034	54883742	1110.79	0.574267	1208.41	0.567258	21.339	0.208298	1.13021e-20	0.382048	1.47209e+06	0.026861	0.227829	0.198502
C2orf74	2	60645068	61664828	2045.06	0.323338	2097.69	0.311819	9.14468	0.510433	1.31283e-20	0.241774	74589.6	0.78758	0.0302715	0.0645554
C2orf76	2	118802225	119866834	3424.26	0.62612	3482.69	0.679073	29.0648	0.439443	2.92094e-20	0.0155319	23252.8	0.74513	0.996564	0.497377
C2orf78	2	73284183	74317148	3788.96	0.236251	3840.63	0.241831	3.46479	0.715766	3.14781e-21	0.981332	3.1242e+06	0.0295508	0.227829	0.198502
C2orf80	2	207665343	208690030	13577.1	0.00308504	14682.8	0.00181262	71.7132	0.00248122	2.76741e-20	0.160047	2.1386e+06	0.00652179	3.79958	1.29018
C2orf81	2	73914176	74921619	1311.27	0.901191	1331.06	0.914625	6.54944	0.849422	4.47195e-21	0.973615	1.56573e+06	0.0415866	0.105037	0.127338
C2orf88	2	189379609	190703484	5474.65	0.37649	5610.17	0.347981	20.852	0.542349	1.89098e-20	0.547143	2.01857e+06	0.0185903	0.606781	0.360511
C2orf92	2	97164217	98203066	60.1593	0.986669	74.6059	0.983378	1.26956	0.916612	7.55493e-22	0.9682	198734	0.381787	1.60328	0.687317
C3	19	6177704	7230562	9476.58	0.344213	9580.05	0.347765	21.6146	0.749824	2.74161e-20	0.928443	1.1569e+06	0.151856	0.715794	0.400633
C3AR1	12	7556844	8566359	8196.56	0.576183	8273.64	0.578274	84.2892	0.0249603	5.91614e-20	0.08051	235870	0.82089	0.424095	0.288277
C3orf14	3	61819015	62836213	7135.6	0.238792	7157.13	0.226469	18.6904	0.781328	2.52527e-20	0.532294	763400	0.159894	1.11566	0.536324
C3orf18	3	50058025	51071027	2017.31	0.583581	1986.19	0.58328	1.29187	0.911764	3.09831e-21	0.741285	1.58566e+06	0.398766	7.38003	2.18077
C3orf20	3	14175141	15273036	5555.59	0.470722	5509.45	0.477267	53.0358	0.156662	3.27406e-20	0.203149	1.52328e+06	0.126416	2.65112	0.985156
C3orf22	3	126026999	127058965	3132	0.510704	3233.97	0.468424	15.9058	0.465631	1.89604e-20	0.268076	1.29865e+06	0.0333256	3.2488	1.14584
C3orf33	3	155262617	156306278	3799.32	0.0199889	3501.74	0.0246803	41.1082	0.0110353	4.04403e-20	0.00169781	1.89535e+06	0.0130284	0.100129	0.12397
C3orf38	3	87649959	88668729	2430.48	0.607265	2408.49	0.611352	5.02614	0.785578	1.92784e-20	0.0721914	1.05283e+06	0.661209	0.00156206	0.0139122
C3orf49	3	63319299	64348636	4763.1	0.551384	5057.09	0.557739	23.7728	0.697115	2.62183e-20	0.232308	673656	0.603099	0.402544	0.279197
C3orf52	3	111586335	112631004	13145.3	0.0252486	13638.5	0.0170943	45.6436	0.125266	5.17326e-20	0.00196786	609398	0.1191	0.64294	0.374021
C3orf62	3	48768596	49777232	3424.01	0.0210717	3743.21	0.01884	9.48651	0.0214029	2.04071e-21	0.751837	2.84707e+06	0.0274934	0.0155649	0.045413
C3orf70	3	184576838	185653060	4438.13	0.489498	4344.42	0.4797	58.8273	0.067539	2.86016e-20	0.0745396	1.35494e+06	0.246456	0.232321	0.200792
C3orf80	3	159725422	160728213	1151.31	0.51509	1109.71	0.546155	4.82636	0.624517	2.5859e-21	0.668837	991076	0.390366	0.043417	0.0783436
C3orf84	3	48677634	49691858	3424.59	0.0213522	3744.09	0.019186	9.51653	0.0336124	2.06287e-21	0.77001	1.70134e+06	0.105295	0.0956626	0.120848
C3orf85	3	108618252	109651401	4889.71	0.346517	4877.9	0.343065	18.5833	0.483772	1.0503e-20	0.941376	287389	0.0853615	0.235406	0.202356
C4A	6	31482057	32502681	920.546	0.914747	1031.47	0.890278	15.9497	0.526208	2.10506e-20	0.598676	385690	0.576876	0.39339	0.275296
C4B	6	31514795	32535418	1072.45	0.922779	1279.09	0.873361	32.7126	0.179193	2.5045e-20	0.571477	1.52747e+06	0.133706	0.902104	0.465697
C4BPA	1	206604233	207644972	3118.11	0.27805	3296.76	0.254846	17.0217	0.48612	1.2892e-20	0.598901	803295	0.276211	2.03225	0.812499
C4BPB	1	206588860	207599993	3118.11	0.27805	3296.76	0.254846	17.0217	0.48612	1.2892e-20	0.598901	968658	0.443306	0.474309	0.308909
C4orf17	4	99011012	100042303	2320.71	0.780273	2256.73	0.79493	10.5848	0.561196	1.34576e-20	0.400696	1.18917e+06	0.202181	1.03789	0.51101
C4orf19	4	36953925	38123495	4004.3	0.858351	4080.39	0.838901	17.5107	0.753382	3.00043e-20	0.40396	61664	0.0446966	0.31024	0.238423
C4orf3	4	118796419	119804445	3239.02	0.471154	3270.17	0.464905	16.6972	0.691208	1.42448e-20	0.642358	61427.5	0.038921	0.57184	0.347243
C4orf33	4	128593317	129616640	6891.02	0.124432	6868.71	0.136867	26.8607	0.704993	2.47287e-20	0.296857	1.30376e+06	0.0412253	2.26128	0.87731
C4orf36	4	86376205	87392422	15567.3	4.34904e-07	15858.7	3.52599e-07	13.4171	0.180731	1.12672e-20	0.323973	1.90778e+06	0.00680731	0.342148	0.252905
C4orf45	4	158393134	159538760	29631.1	8.19989e-11	27633.5	1.26791e-10	52.1542	0.00053474	2.0545e-20	0.0627954	1.52481e+06	0.040216	0.347213	0.255163
C4orf46	4	158166675	159172255	29716.1	1.6742e-10	27785.2	2.66577e-10	52.7085	0.00158087	2.26114e-20	0.0865563	706576	0.410154	3.46638	1.20323
C4orf47	4	184926249	185949826	6379.51	0.770115	6567.14	0.754444	36.8878	0.571835	3.07764e-20	0.801525	1.15367e+06	0.49457	3.07676	1.10008
C4orf48	4	1541995	2543964	5825.07	0.255374	5579.36	0.281187	35.0354	0.212618	3.13905e-20	0.197422	723418	0.207621	0.0050131	0.0252331
C4orf50	4	5397373	6700555	22149.6	0.103435	22403.2	0.108784	80.6968	0.320172	8.14234e-20	0.100936	797702	0.469928	3.18241	1.12822
C4orf51	4	145180146	146271032	1556.75	0.849539	1617.2	0.859798	3.42765	0.976774	6.3939e-21	0.954466	289416	0.105996	0.376585	0.268059
C4orf54	4	99136529	100157828	2204.34	0.793412	2151.97	0.806903	6.20089	0.785686	1.05791e-20	0.487342	2.11695e+06	0.00459113	1.54922	0.671109
C5	9	120432987	121575195	1823.36	0.587115	1867.47	0.585533	3.30431	0.887236	1.4856e-20	0.136477	2.12238e+06	0.189662	4.07839e-06	0.000700356
C5AR1	19	46790023	47822066	7466.06	0.212007	7393.87	0.222816	24.6632	0.449884	2.97097e-20	0.295582	399036	0.304547	0.0951172	0.120463
C5AR2	19	46832175	47847329	7368.45	0.192405	7306.41	0.204419	24.6882	0.410706	2.83111e-20	0.196671	1.27315e+06	0.0365345	0.00578213	0.0271554
C5orf15	5	133455510	134468674	2729.2	0.673516	3093.1	0.577705	47.6801	0.0126551	1.97602e-20	0.614913	1.23075e+06	0.391719	0.100861	0.124476
C5orf22	5	31032287	32055053	16526.9	0.0174559	16560.6	0.0183614	48.4744	0.4042	3.05261e-20	0.707742	1.00658e+06	0.129461	0.171867	0.168477
C5orf24	5	134345680	135359735	2576.64	0.638247	2785.82	0.55563	60.3471	0.012676	2.08586e-20	0.19809	1.00301e+06	0.130994	0.757149	0.415418
C5orf34	5	42986709	44015148	1128.38	0.145177	1114.57	0.17092	13.0993	0.255819	1.60069e-20	0.00561342	998932	0.00244747	1.28382	0.589745
C5orf46	5	147380726	148406538	4047.18	0.0443304	4078.01	0.0531693	17.4937	0.110766	2.53333e-20	0.0295285	1.09729e+06	0.338528	0.817261	0.43654
C5orf47	5	173473779	174506140	6204.22	0.547942	6429.31	0.536163	61.6763	0.171948	4.62517e-20	0.0374816	350896	0.456512	0.53049	0.331241
C5orf52	5	157171533	158180158	1474.72	0.974971	1649.22	0.966671	11.013	0.784139	1.56285e-20	0.73331	1.89688e+06	0.198358	1.75929	0.733503
C5orf58	5	169729104	170752575	4738.88	0.372281	5221.79	0.269351	40.1385	0.0695603	2.29416e-20	0.477329	1.52104e+06	0.000355954	1.32494	0.60257
C5orf63	5	126545235	127573506	1142.63	0.769209	1197.61	0.765674	25.8162	0.109622	8.17708e-21	0.746568	241075	0.230613	1.4201	0.631924
C6	5	40642116	41761438	3576.07	0.319591	3655.2	0.31839	27.4749	0.478983	1.44081e-20	0.601604	419478	0.184408	0.0144198	0.0436308
C6orf118	6	164779664	165809605	4877.01	0.911561	4989.78	0.907197	28.2054	0.729533	2.42566e-20	0.680462	441956	0.561778	0.491392	0.315777
C6orf120	6	169202126	170206360	6121.28	0.193678	5898.23	0.246838	40.862	0.00537962	1.88188e-20	0.390984	443075	0.961665	0.997426	0.497663
C6orf132	6	41592233	42642620	2785.14	0.942484	2886.19	0.936278	24.0852	0.641174	1.75177e-20	0.969939	1.58552e+06	0.157446	0.0144198	0.0436308
C6orf136	6	30147039	31153210	1021.35	0.919383	1052.21	0.914128	5.50624	0.942836	8.88878e-21	0.811108	447848	0.418442	0.670299	0.384105
C6orf141	6	49050666	50061907	2225.43	0.517698	2088.81	0.543104	6.69976	0.887202	2.85778e-21	0.956931	403776	0.504575	1.48395	0.651388
C6orf15	6	30611223	31612575	2186.97	0.907835	2199.85	0.915141	26.3886	0.86191	4.25808e-20	0.642279	1.18229e+06	0.20934	0.920455	0.471912
C6orf163	6	86844813	87865463	5193.7	0.0340233	4973.41	0.0504956	14.6751	0.149993	1.2533e-20	0.152341	1.1197e+06	0.230593	0.0491206	0.0837563
C6orf226	6	42390265	43390821	2559.44	0.418226	2609.7	0.404973	6.30162	0.828626	3.02164e-21	0.983062	1.3411e+06	0.229691	0.0750889	0.105647
C6orf47	6	31158298	32160778	2013.54	0.854364	2084.16	0.862847	31.4561	0.690784	4.26451e-20	0.653301	1.04751e+06	0.345174	0.246714	0.20803
C6orf52	6	10171418	11194797	4314.25	0.135792	4117.69	0.163359	28.7772	0.386385	2.43904e-20	0.332725	1.19637e+06	0.241112	0.00103988	0.0113185
C6orf58	6	127019455	128091820	3149.6	0.267293	3274.89	0.249023	3.32948	0.729874	8.28821e-21	0.259308	1.46254e+06	0.167884	0.0406586	0.0756182
C6orf62	6	24204861	25220825	3922.43	0.783821	4025.12	0.788252	18.8137	0.635551	1.10973e-20	0.981577	1.12219e+06	0.273909	0.00103988	0.0113185
C6orf89	6	36371870	37428964	4392.63	0.320829	4439.53	0.311764	26.9501	0.170342	2.08049e-20	0.103815	2.05577e+06	0.0187048	2.24932	0.873956
C7	5	40409492	41520216	4018.22	0.270678	4153.15	0.275334	28.8374	0.530038	1.57058e-20	0.486021	673593	0.476484	4.48258	1.46544
C7orf25	7	42409273	43412305	5873.09	0.20925	6211.31	0.186339	27.8786	0.509218	2.16957e-20	0.354109	1.20883e+06	0.41487	0.000186763	0.0047614
C7orf31	7	24634692	25680356	3957.39	0.30634	4002.77	0.301294	36.2797	0.0699295	1.76583e-20	0.525894	1.30994e+06	0.430179	0.0470363	0.0818107
C7orf33	7	148090766	149115860	5716.53	0.241705	5616.01	0.289191	15.4877	0.718065	2.48695e-20	0.275437	1.30431e+06	0.369324	0.0962617	0.12127
C7orf50	7	496986	1638260	9546.96	0.0799081	9412.59	0.0806178	45.662	0.0390599	5.02284e-20	0.0176606	1.46551e+06	0.164973	1.27512	0.587021
C7orf57	7	47535511	48561304	3010.22	0.525198	3181.26	0.475587	28.1011	0.0957084	2.38396e-20	0.439314	1.06804e+06	0.527346	0.249511	0.20942
C8A	1	56354768	57418223	6835.77	0.303328	6766.01	0.304359	22.9774	0.290984	3.52441e-20	0.0320998	924936	0.0143829	0.228215	0.198699
C8B	1	56429207	57474383	6864.33	0.295472	6783.45	0.29377	23.0442	0.266654	3.5459e-20	0.0279149	2.42536e+06	0.0119074	0.0407884	0.0757482
C8G	9	136445185	137446975	8135.76	0.480287	8517.05	0.434146	25.1069	0.706363	2.92091e-20	0.378056	942909	0.271884	0.402434	0.279151
C8orf17	8	139431172	140433942	10282.2	0.000779814	10526.4	0.000636136	18.3113	0.399491	2.63047e-20	0.30278	1.51348e+06	0.0162835	0.921553	0.472283
C8orf33	8	144552465	145566685	387.861	0.784241	394.148	0.783659	1.28035	0.595483	1.68801e-21	0.655422	1.50548e+06	0.0123013	2.23759	0.870661
C8orf34	8	67830955	69319023	5323.81	0.335007	5350.75	0.327622	31.8168	0.188607	2.75797e-20	0.489739	420031	0.722021	2.40748	0.91809
C8orf44-SGK3	8	66167596	67360472	3552.46	0.048105	3526.34	0.0484797	2.06015	0.200853	7.7721e-21	0.0788649	389383	0.386924	0.148424	0.154873
C8orf48	8	13066869	14068288	11904.9	0.137682	11772.2	0.153129	52.7708	0.685433	3.73689e-20	0.581236	320552	0.556815	0.4324	0.291737
C8orf58	8	22099599	23104150	5830.74	0.270543	5760.31	0.298053	10.7263	0.823476	1.48908e-20	0.764686	3.89155e+06	0.000393891	4.57227	1.4882
C8orf74	8	10172628	11200590	9242.4	0.293168	9150.29	0.353241	19.6954	0.980845	1.74074e-20	0.96255	2.46388e+06	0.0281848	0.827716	0.440173
C8orf76	8	122719967	123741377	7678.74	0.198561	7893.85	0.185891	11.8902	0.956733	1.33271e-20	0.895	1.54229e+06	0.0575293	0.168154	0.16637
C8orf82	8	144025733	145029132	26749.9	3.3452e-07	27738.7	3.15717e-07	15.1362	0.0237181	4.47942e-21	0.289033	1.86948e+06	0.074908	0.234741	0.202019
C8orf88	8	90458471	91485238	1181.3	0.548504	1247.66	0.537255	1.32339	0.897762	4.10001e-21	0.673913	2.05767e+06	0.0188829	0.111795	0.131879
C8orf89	8	72741331	73759530	1723.14	0.917069	1734.46	0.927042	18.9972	0.333422	2.21227e-20	0.213835	1.30102e+06	0.144109	0.583078	0.351534
C8orf90	8	141014638	142018737	5577.89	0.851097	5637.51	0.861866	29.1385	0.607197	2.28455e-20	0.686467	272568	0.114591	0.047449	0.0821989
C9	5	38784140	39871324	4572.17	0.246186	4432.19	0.260019	26.7496	0.113806	3.10016e-20	0.00605271	569580	0.602601	0.1185	0.13628
C9orf131	9	34541095	35545986	5613.67	0.05984	5270.72	0.076424	14.8794	0.299339	1.22126e-20	0.772519	2.03648e+06	0.0555454	0.554739	0.340666
C9orf152	9	109690048	110708159	5006.37	0.158084	5066	0.145212	32.9592	0.424286	3.31877e-20	0.185728	309412	0.932096	2.10463	0.833116
C9orf153	9	85720265	86759657	1730.33	0.3802	1611.86	0.496207	24.9424	0.576085	1.53404e-20	0.490137	1.97103e+06	0.129293	1.19457	0.5616
C9orf24	9	33879019	34897828	2252.43	0.392962	2333.98	0.402812	5.15413	0.912433	5.81164e-21	0.880107	1.41279e+06	0.155678	0.0538106	0.0880117
C9orf40	9	74446583	75452912	8222.91	0.0227583	8288.48	0.0250341	16.852	0.304023	2.34293e-20	0.0398398	922338	0.00247021	0.0466102	0.0814086
C9orf43	9	112910054	113929690	5135.04	0.275442	5129.21	0.297126	25.0352	0.668303	2.14332e-20	0.794903	1.12483e+06	0.504773	0.0590964	0.0926263
C9orf50	9	129112225	130121101	10609.6	0.149815	10783.2	0.141735	34.8834	0.31839	3.76547e-20	0.318777	2.34693e+06	0.00382774	0.219955	0.194448
C9orf57	9	71551376	72572721	3437.24	0.260288	3522	0.303817	11.7081	0.853065	1.77098e-20	0.501269	1.11664e+06	0.207673	4.47964	1.46469
C9orf64	9	83438311	84456986	2015.24	0.449174	1959.8	0.475097	13.187	0.608243	9.46458e-21	0.916984	519417	0.908571	12.5333	3.39819
C9orf72	9	27035640	28073866	11581.1	0.0966619	11753.5	0.0925661	36.3427	0.513591	4.53941e-20	0.197265	862593	0.761686	0.770936	0.420299
C9orf78	9	129327290	130335863	9354.82	0.40911	9670.29	0.366654	35.2887	0.442623	4.09149e-20	0.305329	1.84203e+06	0.0309972	0.550763	0.339129
C9orf85	9	71411510	72486054	9214.65	0.00635084	9726.97	0.00508174	24.4438	0.4316	2.84327e-20	0.195932	1.38282e+06	0.00562213	0.64147	0.373476
CA1	8	84827608	85879014	1248.04	0.353443	1204.3	0.393591	3.64349	0.505784	1.52881e-21	0.856151	1.77666e+06	0.222334	0.594275	0.355787
CA10	17	51130313	52660017	4257.05	0.348772	4179.03	0.359097	10.0043	0.923149	1.34439e-20	0.764184	901013	0.733464	0.0108544	0.0376198
CA11	19	48137946	49146187	10864.6	0.0551245	11082.9	0.0458153	44.9841	0.0619697	3.88247e-20	0.00913296	2.06223e+06	0.0136572	2.69245	0.996433
CA12	15	62821378	63881846	16966.6	0.000348505	17148.2	0.000309969	32.3211	0.216698	4.5907e-20	0.0056737	1.67878e+06	0.0311439	0.282421	0.225396
CA13	8	84720587	85784073	1294.13	0.2968	1263.38	0.328315	4.52688	0.479588	2.67925e-21	0.773882	1.72838e+06	0.292384	0.0903906	0.117088
CA14	1	149757251	150765078	2104.12	0.645236	2087.88	0.664634	6.70313	0.743239	3.21633e-21	0.674824	1.46512e+06	0.0686126	0.0407181	0.0756778
CA2	8	84963968	85981493	1153.79	0.301796	1104.42	0.343107	3.56368	0.497823	1.64145e-21	0.871009	1.48956e+06	0.236448	0.713585	0.399837
CA3	8	84873436	85949040	1282.41	0.383741	1241.41	0.427053	3.69563	0.516727	1.74662e-21	0.882697	1.61278e+06	0.0373465	0.245485	0.207417
CA4	17	59649942	60670899	948.946	0.742981	1023.2	0.717363	9.11664	0.611547	7.42372e-21	0.382335	1.42871e+06	0.0125048	0.677675	0.386805
CA5A	16	87381546	88436580	11931.8	0.186551	11468.8	0.225988	40.7388	0.600954	3.59133e-20	0.607984	1.64172e+06	0.0349305	0.00282198	0.0188002
CA6	1	8445867	9475092	5511.92	0.228615	5469.51	0.253939	18.6946	0.85746	1.9901e-20	0.751102	1.65288e+06	0.0376646	2.81219	1.02895
CA7	16	66344414	67354153	13998.9	2.54962e-07	13950.8	3.16523e-07	1.47883	0.51586	1.8218e-21	0.193047	1.0338e+06	0.452796	0.307179	0.237009
CA8	8	59685412	60781400	1963.96	0.101945	1967.36	0.104808	7.78515	0.300744	1.07365e-20	0.308841	2.79592e+06	0.0337054	3.40844	1.188
CA9	9	35173928	36181159	4716.93	0.238015	4459.93	0.283917	14.071	0.0614981	1.55906e-20	0.58758	1.29256e+06	0.297913	0.910832	0.468657
CAAP1	9	26340685	27392803	2752.8	0.891095	2713.45	0.88745	39.8548	0.307472	4.22294e-20	0.0807325	2.18504e+06	0.026805	0.680236	0.38774
CAB39	2	230212842	231321075	2202.17	0.606828	2172.62	0.628831	10.3679	0.736988	1.01399e-20	0.883272	1.49753e+06	0.238888	0.311376	0.238947
CAB39L	13	48808650	49944064	3172.27	0.310592	3048.77	0.316331	15.7202	0.544661	2.11272e-20	0.137349	990874	0.336243	2.08586	0.827781
CABCOCO1	10	61162929	62266766	19265.2	2.1969e-07	19147.5	1.71724e-07	37.4081	0.0143271	3.84284e-20	0.00350944	1.67986e+06	0.580265	0.0151541	0.0447808
CABIN1	22	23511192	24678628	7199.89	0.100845	7459.19	0.0822047	29.2221	0.221954	3.28785e-20	0.0973477	22960.4	0.971678	0.238579	0.203957
CABLES1	18	22634564	23760470	678.302	0.906728	705.613	0.908633	15.9499	0.174583	1.46542e-20	0.0740819	1.79097e+06	0.122636	0.710721	0.398805
CABLES2	20	61888634	62907285	7380.18	0.377594	7455.69	0.371017	18.5151	0.964499	1.81285e-20	0.668489	1.76716e+06	0.0112559	0.217099	0.192966
CABP1	12	120140626	121167324	3960.75	0.691008	4098.4	0.669741	19.4282	0.0307522	1.93212e-20	0.112812	2.22865e+06	0.111364	0.353073	0.257763
CABP2	11	67018912	68024517	13025.7	0.0110798	13218.6	0.00945325	23.6833	0.158753	1.79609e-20	0.213807	1.42343e+06	0.296198	0.804378	0.432048
CABP4	11	66952406	67961752	12998	0.00817576	13189.3	0.00709413	23.6367	0.148156	1.78364e-20	0.190799	1.29435e+06	0.0333247	2.69863	0.998117
CABP5	19	47529383	48544079	6464.47	0.0976634	6436.85	0.10038	22.2129	0.134037	3.68089e-20	0.0770272	1.17082e+06	0.346519	0.041416	0.0763742
CABP7	22	29220003	30231833	1275.54	0.843475	1291.5	0.846394	1.72029	0.991295	6.07754e-21	0.861497	2.23404e+06	0.0900462	0.503246	0.320502
CABS1	4	69834981	70837116	2146.76	0.671862	2083.59	0.66772	2.92933	0.991451	8.05035e-21	0.974334	2.16418e+06	0.100758	1.15424	0.548731
CABYR	18	23638987	24661600	14789.7	9.05276e-05	15452.6	5.75738e-05	35.5013	0.0108931	5.23187e-20	0.000567321	994124	0.221368	4.78049	1.54085
CACFD1	9	132959965	133970848	18020.2	0.0109311	18559.4	0.00800231	77.0625	0.0138575	4.6503e-20	0.193954	2.98923e+06	0.00564979	0.397495	0.277049
CACHD1	1	63970129	65193058	5036.53	0.364034	5181.41	0.348765	31.8543	0.196914	3.46096e-20	0.0875035	1.88174e+06	0.144604	0.846983	0.446837
CACNA1A	19	12706442	14133025	4864.23	0.841229	4961.03	0.815974	33.8175	0.410682	1.52724e-20	0.917406	2.1004e+06	0.107092	0.0137299	0.0425261
CACNA1B	9	137377782	138624624	5434.87	0.225731	5816.49	0.202323	15.2628	0.58502	1.45068e-20	0.351537	1.25798e+06	0.0610789	0.267866	0.218412
CACNA1C	12	1470772	3197950	11965.4	0.625858	11675.6	0.659691	98.3603	0.225964	7.58412e-20	0.0519193	2.69869e+06	0.11291	1.2695	0.585258
CACNA1D	3	52828963	54313733	6412.42	0.342457	6761.86	0.302252	32.2294	0.0971305	2.07924e-20	0.516189	2.06642e+06	0.052105	0.0400675	0.075024
CACNA1E	1	180817690	182313262	10416.7	0.0214186	10227	0.0276077	21.9539	0.393833	1.81724e-20	0.824654	577052	0.441035	1.78073	0.739785
CACNA1G	17	50060715	51127474	21404.3	3.47008e-05	21470.2	3.94692e-05	27.4675	0.547191	2.96298e-20	0.452881	3.17819e+06	0.0134391	0.290027	0.228999
CACNA1H	16	653106	1721771	5102.57	0.887474	5273.25	0.862867	16.0978	0.990252	1.22936e-20	0.956343	3.46086e+06	0.0126624	2.02837	0.811391
CACNA1I	22	39070753	40189735	1271.3	0.965094	1246.21	0.973307	5.3593	0.989717	6.80182e-21	0.898437	483975	0.287199	0.463432	0.304497
CACNA1S	1	200539512	201612451	6168.59	0.605577	6364.98	0.59974	23.5631	0.591816	2.74717e-20	0.459607	2.00044e+06	0.0127711	2.51548	0.947949
CACNA2D1	7	81446444	82943956	3928.49	0.6834	4157.17	0.693076	15.8596	0.794692	1.56488e-20	0.75934	2.39294e+06	0.00379253	0.666519	0.382719
CACNA2D2	3	49862613	51004244	2117.03	0.55564	2077.7	0.557386	1.46792	0.885062	6.06575e-21	0.357101	2.12351e+06	0.0474979	0.511718	0.323859
CACNA2D3	3	53622552	55574557	4543.36	0.938338	4530.27	0.946243	46.6786	0.599057	3.743e-20	0.681561	181942	0.525839	0.0272998	0.0610973
CACNA2D4	12	1291963	2418666	6144.07	0.455331	6231.49	0.453033	64.4335	0.104851	5.31133e-20	0.0488338	1.86485e+06	0.309017	0.291062	0.229486
CACNB1	17	38673453	39697702	1607.58	0.496095	1694.85	0.505917	24.0325	0.348893	1.13458e-20	0.460024	2.17363e+06	0.00260385	0.247314	0.208328
CACNB2	10	17640424	19043557	4365.59	0.0271561	4340.57	0.0292421	14.5993	0.869803	3.22973e-20	0.150736	4.44572e+06	0.0290035	0.884025	0.459543
CACNB3	12	48313794	49328941	977.129	0.697715	1045.8	0.652262	10.2506	0.818355	2.17082e-20	0.0774105	2.45379e+06	0.00509864	1.42835	0.634448
[truncated: 16,957 more rows]

## Sheet: 2.Schizophrenia
Supplementary Data Table 2.Schizophrenia showing gene-disease associations for methods compared including RBAM-ED, RBAM-D, RBAM-E, RBAM-XAI, SKAT, REGENIE. )The table includes gene name, chromosome, region start and end),
Gene_name	Gene_chromosome	Region_start	Region_end	Q_test (RBAM_ED)	pvalue (RBAM_ED)	Q_test (RBAM_D)	pvalue (RBAM_D)	Q_test (RBAM_E)	pvalue (RBAM_E)	Q_test (RBAM_XAI)	pvalue (RBAM_XAI)	Q_test (SKAT)	pvalue (SKAT)	CHISQ (REGENIE)	pvalue (REGENIE)
A1BG	19	57845178	58853492	6323.1	0.876489	2.73565	0.985728	2.73565	0.985728	2.59515e-14	0.920727	1.38629e+06	0.383193	2.46328	0.116535
A1CF	10	50299409	51385675	5801.69	0.97883	7.15852	0.733979	7.15852	0.733979	6.74259e-14	0.73336	1.45378e+06	0.287634	0.998981	0.317557
A2M	12	8567664	9616229	15264.2	0.591771	14.905	0.522402	14.905	0.522402	6.26989e-14	0.715737	1.66901e+06	0.0352715	5.38263	0.0203381
A2ML1	12	8322621	9387001	21034.7	0.650965	17.7376	0.564825	17.7376	0.564825	7.60684e-14	0.760714	1.90089e+06	0.030002	NA	NA
A3GALT2	1	32806766	33821098	9706.74	0.928711	18.1077	0.516496	18.1077	0.516496	8.41269e-14	0.241945	2.15984e+06	0.0460408	2.90119	0.0885136
A4GALT	22	42192121	43221298	38469.2	0.0503007	17.3976	0.0576928	17.3976	0.0576928	1.87629e-13	0.0528553	1.39371e+06	0.371905	NA	NA
A4GNT	3	137623713	138632390	9935.48	0.669386	4.93246	0.722481	4.93246	0.722481	1.85784e-14	0.711526	530942	0.886145	0.0301955	0.862047
AAAS	12	52807456	53824864	21852.3	0.27256	39.7558	0.0119523	39.7558	0.0119523	8.69452e-14	0.187385	1.32314e+06	0.95234	0.500698	0.479194
AACS	12	124565434	125643333	44417.8	0.6013	51.0085	0.286255	51.0085	0.286255	1.89217e-13	0.443232	1.02984e+06	0.171713	NA	NA
AADAC	3	151314073	152328488	14099	0.749898	5.6387	0.856112	5.6387	0.856112	8.12261e-14	0.619037	425165	0.608716	2.24252	0.134262
AADACL2	3	151233916	152261339	14154.6	0.779509	5.74657	0.91125	5.74657	0.91125	8.12337e-14	0.61988	438988	0.627967	2.26082	0.132684
AADACL3	1	12216110	13228760	9438.73	0.18746	17.01	0.150485	17.01	0.150485	1.0095e-13	0.00590551	1.72969e+06	0.109903	3.04324	0.0810737
AADACL4	1	12144085	13167076	11022.2	0.309368	18.1642	0.289265	18.1642	0.289265	1.01334e-13	0.00745483	1.68906e+06	0.120714	2.9495	0.0859033
AADAT	4	169560222	170591699	7549.75	0.846076	6.60056	0.667626	6.60056	0.667626	4.58174e-14	0.603647	866487	0.00273419	0.684096	0.40818
AAGAB	15	66700667	67755195	23666.7	0.656116	14.7908	0.664552	14.7908	0.664552	2.10005e-13	0.317025	1.67987e+06	0.105962	NA	NA
AAK1	2	68957997	70174349	29312	0.0204242	28.6394	0.177416	28.6394	0.177416	1.72948e-13	0.0163437	2.13783e+06	0.00628173	2.7127	0.099552
AAMDC	11	77321109	78418432	13294.2	0.541267	1.97957	0.841243	1.97957	0.841243	1.66801e-14	0.667393	1.41097e+06	0.941329	0.609495	0.434978
AAMP	2	217764129	218770178	11496.7	0.531624	2.06068	0.991465	2.06068	0.991465	2.79971e-14	0.935499	128355	0.692775	0.0172121	0.895621
AANAT	17	75953351	76970117	13292.4	0.620146	14.6576	0.731491	14.6576	0.731491	1.30993e-13	0.408295	1.50306e+06	0.776851	2.85895	0.0908657
AAR2	20	35736131	36770918	1969	0.793858	1.33524	0.872051	1.33524	0.872051	2.76397e-15	0.970703	1.63574e+06	0.571777	3.82788	0.0504069
AARD	8	116438207	117444487	21317.4	0.4084	15.9843	0.649947	15.9843	0.649947	8.19926e-14	0.552635	1.18476e+06	0.196058	NA	NA
AARS1	16	69751983	70789707	10675.2	0.14091	14.7016	0.148148	14.7016	0.148148	6.01393e-14	0.180668	1.18577e+06	0.732944	4.63887	0.0312558
AARS2	6	43798731	44813347	24048.9	0.798669	32.8186	0.559225	32.8186	0.559225	1.51431e-13	0.501445	1.42666e+06	0.476359	NA	NA
AARSD1	17	42450526	43464498	4219.51	0.731155	0.627044	0.838479	0.627044	0.838479	1.75932e-14	0.4844	1.31615e+06	0.686867	0.0487955	0.825173
AASDH	4	55838287	56887508	45217.2	0.304758	33.8021	0.185153	33.8021	0.185153	1.48258e-13	0.575539	1.47934e+06	0.491805	NA	NA
AASDHPPT	11	105575501	106598699	11132.8	0.435376	19.0135	0.0178991	19.0135	0.0178991	3.39674e-13	0.00454998	1.15276e+06	0.316437	1.27361	0.25909
AASS	7	121564583	122644308	11437.9	0.674636	20.2	0.298419	20.2	0.298419	3.36907e-14	0.510257	700025	0.87756	0.204529	0.65109
AATF	17	36448925	37556871	13997.4	0.882573	8.55108	0.959048	8.55108	0.959048	1.04892e-13	0.409393	1.41351e+06	0.910635	0.349834	0.554207
AATK	17	80610487	81666221	17971.9	0.618537	22.6576	0.32346	22.6576	0.32346	1.01199e-13	0.538688	1.47952e+06	0.389196	NA	NA
ABAT	16	8174596	9284575	27483.5	0.892024	42.201	0.524338	42.201	0.524338	1.49964e-13	0.762042	2.11146e+06	0.0170218	NA	NA
ABCA1	9	104281006	105428155	33343.6	0.349681	27.7094	0.260762	27.7094	0.260762	1.40612e-13	0.537836	1.05704e+06	0.561178	NA	NA
ABCA10	17	68647214	69744846	49600.7	0.0745866	15.9496	0.66632	15.9496	0.66632	1.59479e-13	0.263282	1.94851e+06	0.0109262	NA	NA
ABCA12	2	214431542	215638626	32800.6	0.127732	19.3564	0.35519	19.3564	0.35519	2.07364e-13	0.0343441	166462	0.806893	NA	NA
ABCA13	7	47671458	49147497	38952.5	0.29394	41.1646	0.0395025	41.1646	0.0395025	1.60725e-13	0.444918	1.93278e+06	0.447929	NA	NA
ABCA2	9	136507234	137528915	14528.9	0.162116	11.9743	0.333808	11.9743	0.333808	1.62242e-13	0.101993	624754	0.623597	1.23609	0.266226
ABCA3	16	1775881	2840746	8585.29	0.638467	11.9488	0.554848	11.9488	0.554848	2.29409e-14	0.942744	1.46951e+06	0.586658	1.41185e-05	0.997002
ABCA4	1	93492834	94621148	34843.3	0.448141	23.1333	0.279335	23.1333	0.279335	2.06169e-13	0.114855	1.29517e+06	0.300044	NA	NA
ABCA5	17	68744311	69827244	24215.7	0.538766	10.2786	0.82941	10.2786	0.82941	9.89846e-14	0.555572	1.91968e+06	0.00671367	NA	NA
ABCA6	17	68578702	69641895	53233.2	0.0929857	18.0157	0.584798	18.0157	0.584798	1.60219e-13	0.268236	1.94108e+06	0.00727907	NA	NA
ABCA7	19	539997	1565572	13535.2	0.916014	15.7579	0.833059	15.7579	0.833059	1.04275e-13	0.684264	1.17874e+06	0.559059	0.0763965	0.782242
ABCA8	17	68367289	69455392	53392.6	0.0755809	18.7141	0.606063	18.7141	0.606063	1.60212e-13	0.0855941	2.08987e+06	0.00400776	NA	NA
ABCA9	17	68474488	69560949	53306.6	0.0936603	18.5269	0.668403	18.5269	0.668403	1.6151e-13	0.29475	1.9225e+06	0.00654177	NA	NA
ABCB1	7	87003017	88213323	7330.33	0.682189	4.24592	0.610415	4.24592	0.610415	1.4121e-14	0.810088	1.35854e+06	0.494922	1.71644	0.190152
ABCB10	1	229016582	230058707	19977.2	0.403447	29.0437	0.128634	29.0437	0.128634	9.74612e-14	0.37245	107393	0.635964	NA	NA
ABCB11	2	168415498	169531324	28904.1	0.493798	19.4319	0.496761	19.4319	0.496761	2.14365e-13	0.272439	708163	0.593655	NA	NA
ABCB4	7	86901696	87980435	4649.97	0.752498	4.42265	0.736431	4.42265	0.736431	1.45114e-14	0.818645	1.31767e+06	0.186234	1.66428	0.197026
ABCB5	7	20115667	21277038	37626.2	0.194659	32.8001	0.329137	32.8001	0.329137	2.17492e-13	0.409679	2.05341e+06	0.325342	NA	NA
ABCB6	2	218709772	219718994	9972.09	0.858701	7.02977	0.679642	7.02977	0.679642	1.1367e-14	0.895826	194932	0.331506	6.36261	0.0116549
ABCB8	7	150528422	151547782	34581.5	0.450692	16.1345	0.931864	16.1345	0.931864	2.11728e-13	0.245305	573851	0.384725	NA	NA
ABCB9	12	122420951	123481649	1200.15	0.731078	2.07284	0.721697	2.07284	0.721697	4.83902e-15	0.770416	837170	0.503359	1.03368	0.309296
ABCC1	16	15449138	16643257	7035.75	0.949321	15.424	0.614953	15.424	0.614953	4.37415e-14	0.818887	1.91346e+06	0.345654	0.0472859	0.827855
ABCC10	6	42927366	43950427	23155.3	0.735303	14.787	0.618449	14.787	0.618449	3.45534e-14	0.903707	1.30532e+06	0.846396	0.792965	0.373205
ABCC11	16	47665773	48747568	5927.73	0.330202	2.41614	0.776272	2.41614	0.776272	1.54774e-14	0.470658	1.50499e+06	0.214588	1.41113	0.234868
ABCC12	16	47580882	48656018	5927.48	0.330108	2.41123	0.772916	2.41123	0.772916	1.5477e-14	0.470613	1.48463e+06	0.185224	1.39897	0.236896
ABCC2	10	99282640	100352594	39337.7	0.176224	13.3908	0.595463	13.3908	0.595463	1.22463e-13	0.312711	1.03584e+06	0.602199	0.327256	0.567279
ABCC3	17	50134777	51192253	28896.4	0.599746	20.0621	0.407471	20.0621	0.407471	7.71692e-14	0.664453	1.2954e+06	0.240359	NA	NA
ABCC4	13	94519835	95801475	50048.9	0.536513	32.5425	0.426271	32.5425	0.426271	2.96433e-13	0.134381	1.59267e+06	0.459291	NA	NA
ABCC5	3	183419934	184517939	46200.5	0.194166	16.2189	0.749124	16.2189	0.749124	2.274e-13	0.106414	362170	0.199626	NA	NA
ABCC6	16	15649565	16723522	6331.36	0.960654	15.2326	0.589348	15.2326	0.589348	4.2559e-14	0.856429	1.67815e+06	0.58186	0.0539313	0.816358
ABCC8	11	16892498	17976894	25973.5	0.0560387	27.4863	0.188715	27.4863	0.188715	1.77831e-13	0.0253313	1.94375e+06	0.0460874	NA	NA
ABCC9	12	21297389	22442543	41352	0.315201	20.7383	0.182232	20.7383	0.182232	1.38698e-13	0.367237	1.96552e+06	0.275282	NA	NA
ABCD2	12	39050033	40119803	26423.5	0.2091	9.3536	0.379434	9.3536	0.379434	5.27013e-14	0.547592	1.59396e+06	0.496198	0.505818	0.476955
ABCD3	1	93918389	95018666	42770.6	0.6246	29.0186	0.359509	29.0186	0.359509	1.7563e-13	0.334658	1.33603e+06	0.374625	NA	NA
ABCD4	14	73785269	74803055	4951.15	0.913449	6.84958	0.859244	6.84958	0.859244	1.87166e-14	0.824329	1.43002e+06	0.436734	0.264055	0.607347
ABCE1	4	144598288	145629524	8239.55	0.798013	1.57125	0.880427	1.57125	0.880427	3.02149e-14	0.639915	418102	0.588066	0.440786	0.506743
ABCF1	6	30071393	31097179	19205.9	0.0721097	13.8628	0.351518	13.8628	0.351518	1.00046e-13	0.085192	2.04522e+06	0.0469187	1.20372	0.27258
ABCF2	7	150711484	151727205	45037.9	0.401175	31.9091	0.492535	31.9091	0.492535	2.67305e-13	0.114288	550266	0.440014	NA	NA
ABCF2-H2BK1	7	150707837	151727166	45037.9	0.401175	31.9091	0.492535	31.9091	0.492535	2.67305e-13	0.114288	555060	0.430005	NA	NA
ABCF3	3	183686095	184694012	46106.8	0.179263	41.9981	0.16268	41.9981	0.16268	2.90614e-13	0.0372122	292992	0.125375	NA	NA
ABCG1	21	41699689	42797244	52687.6	0.314389	53.5386	0.458648	53.5386	0.458648	3.12724e-13	0.385017	1.4948e+06	0.383945	NA	NA
ABCG2	4	87590150	88731628	20110.8	0.685479	7.83446	0.9306	7.83446	0.9306	9.56717e-14	0.186816	1.36008e+06	0.545893	NA	NA
ABCG4	11	118649052	119662653	12444.5	0.514791	14.416	0.512908	14.416	0.512908	1.04343e-13	0.375647	807581	0.867499	1.09419	0.295545
ABCG5	2	43312472	44338865	17122.4	0.339975	6.68545	0.790178	6.68545	0.790178	4.13568e-14	0.654591	1.38747e+06	0.532487	0.508966	0.475587
ABCG8	2	43331942	44382988	17122.4	0.339975	6.68545	0.790178	6.68545	0.790178	4.13568e-14	0.654591	1.43804e+06	0.520113	0.458671	0.498246
ABHD1	2	26623789	27630812	62862.3	0.00307772	18.2372	0.089163	18.2372	0.089163	8.28786e-14	0.0408909	1.59109e+06	0.420749	2.79014	0.0948462
ABHD10	3	111479010	112493368	27813.5	0.288615	13.9246	0.241436	13.9246	0.241436	9.59727e-14	0.507447	1.29986e+06	0.0516247	7.08586	0.00776945
ABHD11	7	73236094	74238852	10875	0.632499	5.97988	0.39469	5.97988	0.39469	1.21735e-13	0.222709	1.54172e+06	0.332604	0.585636	0.444111
ABHD12	20	24794742	25890835	10821.8	0.0975755	5.67506	0.157622	5.67506	0.157622	1.4182e-14	0.51006	1.8504e+06	0.459716	0.80612	0.36927
ABHD12B	14	50372053	51404970	133957	0.0186223	35.983	0.0442589	35.983	0.0442589	3.16422e-13	0.0992297	1.41604e+06	0.287858	NA	NA
ABHD13	13	107718392	108734243	20405.4	0.875681	28.5508	0.455085	28.5508	0.455085	8.49339e-14	0.906311	1.04501e+06	0.202228	NA	NA
ABHD14A	3	51471426	52481196	10300.6	0.00788487	11.4515	0.0610442	11.4515	0.0610442	7.48713e-14	0.0642603	1.59041e+06	0.482974	0.119014	0.730106
ABHD14A-ACY1	3	51474706	52489183	10300.6	0.00788487	11.4515	0.0610442	11.4515	0.0610442	7.48713e-14	0.0642603	1.59597e+06	0.486188	0.119014	0.730106
ABHD14B	3	51468510	52483409	10300.6	0.00788487	11.4515	0.0610442	11.4515	0.0610442	7.48713e-14	0.0642603	1.59093e+06	0.485269	0.119014	0.730106
ABHD15	17	29060547	30067037	1651.72	0.812117	1.57608	0.833948	1.57608	0.833948	3.55821e-14	0.628932	1.99339e+06	0.305386	6.2928	0.012123
ABHD16A	6	31186955	32203356	20335.2	0.390157	14.7614	0.41725	14.7614	0.41725	9.05878e-14	0.29102	1.75875e+06	0.136173	NA	NA
ABHD16B	20	63361498	64362988	23503.8	0.261345	48.5769	0.00409218	48.5769	0.00409218	1.03836e-13	0.191293	1.3523e+06	0.150426	0.893366	0.344566
ABHD17A	19	1376810	2385496	8815.56	0.831128	36.7465	0.039962	36.7465	0.039962	7.41647e-14	0.673797	1.43358e+06	0.29889	1.07749	0.29926
ABHD17B	9	71362452	72411193	32537.1	0.450682	23.6236	0.182912	23.6236	0.182912	1.36866e-13	0.329533	1.49061e+06	0.671084	0.552996	0.457097
ABHD17C	15	80179684	81255621	19620.3	0.938864	17.9533	0.824081	17.9533	0.824081	1.5949e-13	0.665592	1.75483e+06	0.04615	NA	NA
ABHD18	4	127465315	128539953	5049.49	0.509329	3.60991	0.374691	3.60991	0.374691	2.62798e-15	0.96476	950708	0.432052	0.897162	0.343544
ABHD2	15	88587459	89702355	25282.5	0.753679	11.8955	0.978152	11.8955	0.978152	7.4344e-14	0.962104	1.2998e+06	0.627169	NA	NA
ABHD3	18	21150901	22204780	5056.23	0.275878	1.11158	0.427347	1.11158	0.427347	3.03347e-14	0.275442	1.80406e+06	0.312556	0.733609	0.391716
ABHD4	14	22098290	23112963	21856.3	0.950006	28.8845	0.448713	28.8845	0.448713	1.31188e-13	0.631441	1.53489e+06	0.768317	NA	NA
ABHD5	3	43190108	44234371	16612	0.673396	5.67408	0.701923	5.67408	0.701923	6.27625e-14	0.432983	1.37688e+06	0.723489	0.309856	0.577769
ABHD6	3	57737532	58795693	12284.9	0.620277	9.866	0.627609	9.866	0.627609	9.06082e-14	0.717512	1.4179e+06	0.375717	0.244009	0.621325
ABHD8	19	16792131	17810236	20914.8	0.693805	37.5991	0.167206	37.5991	0.167206	3.55469e-13	0.144935	1.95505e+06	0.0136553	NA	NA
ABI1	10	26246593	27361087	39323.5	0.230152	31.5082	0.390406	31.5082	0.390406	1.28198e-13	0.35711	1.92768e+06	0.416385	NA	NA
ABI2	2	202828280	203947728	9748.3	0.170318	7.60721	0.538321	7.60721	0.538321	3.50721e-14	0.418865	183834	0.496506	0.72321	0.395093
ABI3	17	48710411	49723225	22313	0.586937	13.0716	0.912242	13.0716	0.912242	1.12212e-13	0.535548	986941	0.898312	1.09635	0.295068
ABI3BP	3	100249156	101493515	11128.3	0.743745	11.4878	0.299969	11.4878	0.299969	7.81661e-14	0.535066	1.55597e+06	0.0572951	2.51715	0.112614
ABITRAM	9	108434400	109450744	10915.1	0.920456	19.2164	0.740665	19.2164	0.740665	7.60398e-14	0.608572	824839	0.65055	NA	NA
ABL1	9	130213043	131387675	42599.4	0.450766	30.4548	0.207305	30.4548	0.207305	2.5626e-13	0.371806	1.16111e+06	0.252807	NA	NA
ABL2	1	178599330	179729684	12987.3	0.773528	9.25895	0.435279	9.25895	0.435279	6.7947e-14	0.669124	434301	0.230038	0.933972	0.333833
ABLIM1	10	113931112	115268061	67150	0.032087	19.5728	0.45	19.5728	0.45	1.52298e-13	0.124798	1.56335e+06	0.0544162	NA	NA
ABLIM2	4	7465310	8658832	66474.3	0.255738	29.6407	0.589572	29.6407	0.589572	3.19334e-13	0.473734	2.30697e+06	0.0572773	NA	NA
ABLIM3	5	148641483	149760542	28186.8	0.624371	15.1928	0.754113	15.1928	0.754113	7.45739e-14	0.827178	345716	0.675692	NA	NA
ABO	9	132733278	133776024	27937.5	0.546315	24.276	0.375307	24.276	0.375307	1.40879e-13	0.639308	722979	0.583181	NA	NA
ABR	17	503519	1729738	22431.1	0.366754	24.0697	0.536012	24.0697	0.536012	2.02865e-13	0.312971	1.44719e+06	0.51006	NA	NA
ABRA	8	106259483	107270244	13799.1	0.718494	16.562	0.324139	16.562	0.324139	2.40295e-13	0.00642496	1.06343e+06	0.339796	1.88007	0.170327
ABRACL	6	138528745	139543302	22525.1	0.662063	22.9633	0.467608	22.9633	0.467608	8.40747e-14	0.734104	658779	0.143214	NA	NA
ABRAXAS1	4	82959517	84023348	14598.4	0.796183	21.7667	0.711987	21.7667	0.711987	2.2e-13	0.149149	1.2514e+06	0.735153	0.75616	0.384533
ABRAXAS2	10	124301819	125336667	41090.8	0.0661229	34.9314	0.556715	34.9314	0.556715	1.02466e-13	0.630085	992246	0.0773477	NA	NA
ABT1	6	26096953	27100739	5742.51	0.541746	8.88216	0.100644	8.88216	0.100644	9.68568e-15	0.682535	1.74554e+06	0.418189	3.19388	0.0739146
ABTB1	3	127172935	128180926	11180.5	0.817414	13.5297	0.277297	13.5297	0.277297	4.07672e-14	0.85852	813958	0.507629	0.885816	0.346614
ABTB2	11	33650987	34858010	40954.8	0.535797	56.1707	0.0719478	56.1707	0.0719478	1.73326e-13	0.513556	2.50642e+06	0.0124343	NA	NA
ABTB3	12	106818421	108159642	23301.8	0.600704	19.2352	0.593678	19.2352	0.593678	1.42576e-13	0.356098	1.54844e+06	0.357267	NA	NA
ACAA1	3	37603129	38637242	10120.5	0.900809	13.8438	0.818167	13.8438	0.818167	6.65289e-14	0.817807	2.00757e+06	0.0468352	0.0466321	0.829031
ACAA2	18	49282164	50313953	37600.7	0.182116	38.1388	0.139772	38.1388	0.139772	1.27879e-13	0.477694	946482	0.737349	NA	NA
ACACA	17	36584992	37906836	30445.4	0.477128	22.6844	0.646761	22.6844	0.646761	2.77023e-13	0.073233	1.78949e+06	0.783992	NA	NA
ACACB	12	108616587	109768226	35451	0.320837	23.7786	0.393763	23.7786	0.393763	9.38001e-14	0.449408	960097	0.642582	NA	NA
ACAD10	12	111186053	112257107	6827.32	0.149611	6.52905	0.33905	6.52905	0.33905	2.80536e-14	0.139802	1.2348e+06	0.120648	0.438753	0.507724
ACAD11	3	132058138	133160082	23431.5	0.649201	11.0363	0.495892	11.0363	0.495892	3.41527e-14	0.7635	897163	0.23033	NA	NA
ACAD8	11	133753548	134765855	27673.1	0.813369	40.277	0.515547	40.277	0.515547	3.20903e-13	0.0698157	547961	0.961567	NA	NA
ACAD9	3	128379596	129424003	10139	0.654981	14.0164	0.203996	14.0164	0.203996	8.27274e-14	0.12828	949173	0.290637	0.603936	0.43708
ACADL	2	209687126	210725447	5885.89	0.617487	2.92212	0.84163	2.92212	0.84163	1.86009e-14	0.564011	87670.8	0.947927	0.0458437	0.83046
ACADM	1	75224431	76287575	15597.3	0.432383	14.9856	0.094323	14.9856	0.094323	8.84457e-14	0.299987	1.65004e+06	0.140585	1.79589	0.18021
ACADS	12	120225774	121240008	15645.7	0.409317	13.0417	0.756974	13.0417	0.756974	7.19403e-14	0.49876	1.02941e+06	0.536196	0.777447	0.377924
ACADSB	10	122508979	123558290	19197.9	0.637857	19.734	0.594268	19.734	0.594268	6.51949e-14	0.971741	807240	0.545672	NA	NA
ACADVL	17	6717125	7725266	21296.9	0.298188	29.4083	0.384834	29.4083	0.384834	1.39315e-13	0.628282	1.77533e+06	0.226623	0.187861	0.664704
ACAN	15	88303436	89375353	22143.3	0.77334	8.94636	0.995959	8.94636	0.995959	6.6006e-14	0.967338	1.41059e+06	0.302489	NA	NA
ACAP1	17	6836529	7851477	21855.7	0.189065	29.8731	0.409798	29.8731	0.409798	1.07149e-13	0.684094	1.7725e+06	0.283792	0.324941	0.568653
ACAP2	3	194774745	195943044	24393.1	0.228609	24.3804	0.453536	24.3804	0.453536	1.86272e-13	0.390267	255210	0.2248	NA	NA
ACAP3	1	792390	1809609	8083.39	0.38554	2.56711	0.769837	2.56711	0.769837	3.01895e-15	0.904965	1.14923e+06	0.707984	1.46452	0.226213
ACAT1	11	107616695	108647603	12920.7	0.526085	6.88046	0.776434	6.88046	0.776434	4.17898e-14	0.547555	1.11156e+06	0.259542	0.714148	0.398071
ACAT2	6	159262045	160279112	103231	0.00872912	44.3577	0.027297	44.3577	0.027297	1.69754e-13	0.15403	650265	0.341452	NA	NA
ACBD3	1	225644679	226686741	36541	0.0875233	38.6695	0.0605572	38.6695	0.0605572	1.97635e-13	0.0899693	116001	0.427727	NA	NA
ACBD4	17	44632600	45644181	14726.4	0.236568	17.5203	0.512846	17.5203	0.512846	1.62895e-13	0.0409377	1.37826e+06	0.627606	0.291834	0.589047
ACBD5	10	26668135	27743046	16546.6	0.671624	6.54551	0.882434	6.54551	0.882434	6.93382e-14	0.310555	1.71386e+06	0.576272	0.133298	0.715038
ACBD6	1	179769653	181002954	21786.2	0.428064	11.4289	0.494967	11.4289	0.494967	9.15324e-14	0.517587	535739	0.0468285	2.89734	0.0887258
ACBD7	10	14575475	15588776	54168.9	0.0639929	20.4223	0.241392	20.4223	0.241392	1.76648e-13	0.153469	1.55891e+06	0.156416	NA	NA
ACCS	11	43565925	44584237	50207.4	0.242053	18.8365	0.741671	18.8365	0.741671	1.27697e-13	0.369175	1.40189e+06	0.549033	NA	NA
ACCSL	11	43547981	44559977	48478.7	0.264184	18.2914	0.758265	18.2914	0.758265	8.34127e-14	0.720973	1.40156e+06	0.511892	NA	NA
ACD	16	67157512	68160810	2909.78	0.446264	3.1332	0.0878611	3.1332	0.0878611	7.54495e-14	0.0143109	1.25952e+06	0.579539	2.08074	0.149168
ACE	17	62977061	63998380	38650.6	0.00266982	24.5	0.0213934	24.5	0.0213934	1.30962e-13	0.00732402	1.42661e+06	0.0785639	4.27102	0.0387677
ACER1	19	5806142	6833612	18059	0.203606	27.7787	0.250838	27.7787	0.250838	2.13014e-13	0.216367	NA	NA	1.62821	0.201951
ACER2	9	18909009	19952505	56969	0.0284062	21.8334	0.353984	21.8334	0.353984	2.19202e-13	0.126357	2.45504e+06	0.0140022	NA	NA
ACER3	11	76360859	77526797	19418.9	0.495972	10.5216	0.876847	10.5216	0.876847	4.1348e-14	0.990296	1.89809e+06	0.437104	NA	NA
ACHE	7	100389994	101396974	33844.1	0.0702136	8.91642	0.69461	8.91642	0.69461	4.0479e-14	0.240845	1.21834e+06	0.100828	1.3927	0.23795
ACIN1	14	22558564	23595614	26517.2	0.637686	26.0701	0.381024	26.0701	0.381024	1.06161e-13	0.656961	1.62485e+06	0.775266	NA	NA
ACKR1	1	158704875	159706500	21608.4	0.430295	15.6632	0.457401	15.6632	0.457401	1.27372e-13	0.172585	596766	0.382515	2.04718	0.152488
ACKR2	3	42304752	43387974	23508.8	0.466342	17.5393	0.626617	17.5393	0.626617	1.33764e-13	0.437742	1.46107e+06	0.539051	NA	NA
ACKR3	2	236067787	237082354	25221.4	0.0910069	51.0626	0.0136491	51.0626	0.0136491	2.06164e-13	0.0432348	236013	0.219424	0.179133	0.672119
ACKR4	3	132097270	133118967	19904.7	0.67726	10.7902	0.474586	10.7902	0.474586	3.41163e-14	0.763162	853240	0.185963	0.781705	0.376621
ACLY	17	41366917	42430542	4856.83	0.736796	8.25916	0.833899	8.25916	0.833899	3.56102e-14	0.919454	1.57729e+06	0.443722	0.0808167	0.776193
ACMSD	2	134338616	135402034	4409.43	0.845697	3.19094	0.751028	3.19094	0.751028	1.22109e-14	0.619784	712063	0.360926	0.0211969	0.884244
ACO1	9	31884603	32954769	17042.7	0.638921	13.1102	0.365969	13.1102	0.365969	1.295e-13	0.297499	1.8102e+06	0.186707	NA	NA
ACO2	22	40947830	42029273	4017.35	0.719557	1.7726	0.595382	1.7726	0.595382	1.05247e-14	0.799189	1.54043e+06	0.62726	3.07696	0.079409
ACOD1	13	76448511	77458638	9039.69	0.863572	8.69847	0.70058	8.69847	0.70058	5.97944e-14	0.564337	1.66649e+06	0.361378	5.81444	0.015895
ACOT1	14	73037143	74043796	21869.9	0.213645	5.38607	0.512667	5.38607	0.512667	3.26841e-14	0.624105	1.45743e+06	0.499446	0.256982	0.612201
ACOT11	1	54042257	55139192	19298.1	0.482347	34.3541	0.0839097	34.3541	0.0839097	2.58676e-13	0.125739	1.98558e+06	0.0463939	NA	NA
ACOT12	5	80829996	81894179	15307.4	0.694115	17.6279	0.699699	17.6279	0.699699	8.73394e-14	0.544371	1.35184e+06	0.529156	NA	NA
ACOT13	6	24167035	25205065	32015.6	0.444849	7.91695	0.958296	7.91695	0.958296	1.60031e-13	0.232349	2.24774e+06	0.0809796	NA	NA
ACOT2	14	73067620	74075658	21869.9	0.213645	5.38607	0.512667	5.38607	0.512667	3.26841e-14	0.624105	1.47338e+06	0.461181	0.252902	0.615039
ACOT4	14	73091873	74095766	21912.7	0.21364	5.52577	0.512519	5.52577	0.512519	3.27102e-14	0.624096	1.47288e+06	0.468018	0.221488	0.637908
ACOT6	14	73110945	74119888	21971.3	0.213697	6.96806	0.505952	6.96806	0.505952	3.27222e-14	0.624098	1.4847e+06	0.47605	0.217728	0.640776
ACOT7	1	5764269	6893767	11189.9	0.3568	19.2327	0.183473	19.2327	0.183473	8.45744e-14	0.3804	NA	NA	0.109813	0.740357
ACOT8	20	45341721	46357405	27236.7	0.31013	23.1575	0.0640944	23.1575	0.0640944	1.26923e-13	0.0419023	1.4537e+06	0.0674355	1.25657	0.262302
ACOX1	17	75441507	76479177	14380	0.291171	17.5044	0.246786	17.5044	0.246786	8.10447e-14	0.155812	1.69724e+06	0.174806	0.0196001	0.88866
ACOX2	3	58005136	59037283	12479.6	0.414593	10.8841	0.572739	10.8841	0.572739	8.90313e-14	0.594716	1.33656e+06	0.353449	0.212258	0.645003
ACOX3	4	7866282	8940723	53090.9	0.197639	25.1547	0.316961	25.1547	0.316961	2.15126e-13	0.396122	1.98963e+06	0.0702454	NA	NA
ACOXL	2	110232539	111618548	18431.4	0.495981	24.1116	0.433165	24.1116	0.433165	5.18822e-14	0.780857	1.15403e+06	0.652181	0.589748	0.442517
ACP1	2	1	778283	17345	0.415302	10.1846	0.88314	10.1846	0.88314	4.87118e-14	0.671374	870217	0.365945	0.369017	0.543541
ACP2	11	46739302	47748906	2042.08	0.429764	0.92195	0.272394	0.92195	0.272394	3.79192e-16	0.524071	1.08303e+06	0.704779	0.495385	0.481535
ACP3	3	131817369	132868302	31412.8	0.470774	12.2769	0.534028	12.2769	0.534028	5.0265e-14	0.589793	858322	0.107155	0.292857	0.588395
ACP4	19	50290415	51295219	46302.6	0.117907	69.4406	0.158222	69.4406	0.158222	3.89857e-13	0.195095	1.30113e+06	0.223163	NA	NA
ACP5	19	11074653	12079993	13080.4	0.442394	17.5306	0.325735	17.5306	0.325735	9.56518e-14	0.321654	1.65875e+06	0.583867	0.174889	0.675803
ACP6	1	147129652	148170524	7783.58	0.513598	4.69054	0.385507	4.69054	0.385507	2.82974e-14	0.873992	734824	0.0887071	0.838679	0.359775
ACP7	19	38583913	39611493	17684.1	0.177143	18.5686	0.191047	18.5686	0.191047	1.30555e-13	0.226177	1.71426e+06	0.109762	4.31862	0.0376973
ACRBP	12	6138075	7147433	47722.3	0.0140152	34.6283	0.0711114	34.6283	0.0711114	1.73357e-13	0.0420256	NA	NA	7.05522	0.00790351
ACRV1	11	125171522	126180874	14981.2	0.886328	23.0922	0.38385	23.0922	0.38385	8.0702e-14	0.821197	716856	0.770311	NA	NA
ACSBG1	15	77667468	78745688	29641.9	0.461928	32.3913	0.26712	32.3913	0.26712	9.56076e-14	0.337014	1.51766e+06	0.768941	NA	NA
ACSBG2	19	5635247	6693094	17705.9	0.150857	20.417	0.304772	20.417	0.304772	1.43645e-13	0.306513	NA	NA	1.77879	0.182298
ACSF2	17	49926158	50974845	43635.2	0.37039	24.3373	0.439679	24.3373	0.439679	1.4059e-13	0.336742	1.12341e+06	0.522322	NA	NA
ACSF3	16	88588375	89664121	10418	0.629863	9.69575	0.843647	9.69575	0.843647	6.99965e-14	0.79904	1.26824e+06	0.59848	6.51455	0.0106997
ACSL1	4	184255595	185326818	30650.5	0.863034	53.7279	0.242524	53.7279	0.242524	1.96399e-13	0.39969	287417	0.108637	NA	NA
ACSL3	2	222360942	223444639	11058.1	0.72576	18.5934	0.432949	18.5934	0.432949	6.69019e-14	0.879519	209861	0.140009	NA	NA
ACSL5	10	111874116	112928379	15074.8	0.838417	20.0956	0.617641	20.0956	0.617641	6.19324e-14	0.844826	1.42933e+06	0.00967349	NA	NA
ACSL6	5	131449973	132512243	7873.93	0.291115	1.79622	0.524118	1.79622	0.524118	4.38033e-14	0.38706	929223	0.048032	1.44794	0.22886
ACSM1	16	20123235	21198890	7692.64	0.91115	9.54038	0.74526	9.54038	0.74526	2.80957e-14	0.957168	1.89123e+06	0.325449	2.40702	0.120793
ACSM2A	16	19951461	20987669	8244.93	0.928927	9.55701	0.624499	9.55701	0.624499	3.00241e-14	0.973063	1.95855e+06	0.118728	2.38963	0.122142
ACSM2B	16	20036226	21076427	8195.66	0.91573	9.47342	0.611472	9.47342	0.611472	2.99177e-14	0.972261	1.94887e+06	0.139044	2.36049	0.124443
ACSM3	16	20110243	21297581	17552	0.630751	13.7662	0.616045	13.7662	0.616045	5.82463e-14	0.856926	2.0883e+06	0.350462	2.39829	0.121468
ACSM4	12	6804072	7828719	46358.3	0.00224805	31.2663	0.0734869	31.2663	0.0734869	1.11661e-13	0.263218	1.79972e+06	0.305191	0.704029	0.401433
ACSM5	16	19909534	20941336	8244.83	0.927863	9.55701	0.624496	9.55701	0.624496	3.00237e-14	0.972619	2.00247e+06	0.0842	2.40617	0.120858
ACSM6	10	94694200	95728929	34715.2	0.266696	12.4603	0.0998176	12.4603	0.0998176	3.32915e-14	0.809299	1.32225e+06	0.532049	1.18787	0.27576
ACSS1	20	24506230	25558980	64342.3	0.00298968	20.2161	0.072228	20.2161	0.072228	1.67773e-13	0.00927709	1.85115e+06	0.287059	0.105724	0.745066
ACSS2	20	34372146	35427962	2930.05	0.552596	3.30563	0.363129	3.30563	0.363129	3.49893e-15	0.725164	1.93656e+06	0.00974482	0.751364	0.386045
ACSS3	12	80436414	81761210	10252.3	0.5362	7.93203	0.174833	7.93203	0.174833	2.60515e-14	0.691173	1.79105e+06	0.502135	0.218422	0.640245
ACTA1	1	228930365	229934104	30263.4	0.245862	32.5053	0.126915	32.5053	0.126915	2.20811e-13	0.0260417	106701	0.462616	NA	NA
ACTA2	10	88435074	89491339	19459.5	0.83901	13.8785	0.772622	13.8785	0.772622	9.84859e-14	0.832917	1.366e+06	0.368929	NA	NA
ACTB	7	5026409	6063902	20877.4	0.643519	11.9705	0.751918	11.9705	0.751918	1.40509e-13	0.517245	1.89459e+06	0.640985	NA	NA
ACTBL2	5	56980018	57982811	26799.4	0.253324	19.981	0.494972	19.981	0.494972	3.52659e-14	0.863945	1.50839e+06	0.547077	0.409274	0.522338
ACTC1	15	34290107	35295589	21626.5	0.666952	14.1861	0.796763	14.1861	0.796763	1.3305e-13	0.475791	1.90307e+06	0.013388	NA	NA
ACTG1	17	81009413	82023847	13935.3	0.179456	20.4312	0.0883998	20.4312	0.0883998	6.44729e-14	0.511264	1.31995e+06	0.421051	0.00626847	0.936895
ACTG2	2	73392314	74419865	6094.22	0.724075	9.52605	0.42709	9.52605	0.42709	3.0662e-14	0.797444	1.61451e+06	0.344311	0.911346	0.339757
ACTL10	20	33166943	34168525	13556	0.112782	8.47827	0.201813	8.47827	0.201813	7.71442e-14	0.254424	2.20676e+06	0.0135595	0.0934062	0.75989
ACTL6A	3	179062886	180088407	14020.3	0.700627	10.4576	0.769495	10.4576	0.769495	5.17162e-14	0.939978	425716	0.061955	NA	NA
ACTL6B	7	100143097	101156448	17228	0.0481142	6.00375	0.494872	6.00375	0.494872	1.81001e-14	0.403381	1.10289e+06	0.189232	0.988912	0.320008
ACTL7A	9	108362266	109363756	10979.1	0.964353	14.5066	0.951241	14.5066	0.951241	8.05288e-14	0.578053	817772	0.622781	NA	NA
ACTL7B	9	108354588	109355986	10979.1	0.964353	14.5066	0.951241	14.5066	0.951241	8.05288e-14	0.578053	812839	0.629959	NA	NA
ACTL8	1	17255333	18327063	24842	0.690714	22.4927	0.941729	22.4927	0.941729	1.14876e-13	0.745356	1.80105e+06	0.111923	NA	NA
ACTL9	19	8197400	9198795	23058.3	0.447813	26.1395	0.698248	26.1395	0.698248	1.10075e-13	0.633387	2.01195e+06	0.0129149	NA	NA
ACTMAP	19	40240856	41251553	6651.51	0.943108	12.2144	0.351641	12.2144	0.351641	1.16352e-13	0.216397	1.57009e+06	0.357948	0.919731	0.337545
ACTN1	14	68374128	69479440	33177.3	0.572564	25.1999	0.292406	25.1999	0.292406	2.19461e-13	0.102727	2.10584e+06	0.00386508	NA	NA
ACTN2	1	236164141	237264631	162310	0.0121181	41.2184	0.24349	41.2184	0.24349	2.60408e-13	0.160905	291986	0.296897	NA	NA
ACTN3	11	66046395	67063334	3679.55	0.817896	1.12251	0.788928	1.12251	0.788928	7.69333e-15	0.711783	1.56401e+06	0.0865523	0.0601769	0.806217
ACTN4	19	38147649	39231589	17458.1	0.242979	22.8557	0.147042	22.8557	0.147042	1.04361e-13	0.29957	2.27099e+06	0.00922842	11.3722	0.000745504
ACTR10	14	57700080	58735636	27252.7	0.190106	17.0812	0.649138	17.0812	0.649138	1.53423e-13	0.302733	1.39472e+06	0.363528	0.0125142	0.910929
ACTR1A	10	101961881	103002712	4429.91	0.725376	3.25258	0.52594	3.25258	0.52594	1.81565e-14	0.633573	963485	0.404526	1.30687	0.252962
ACTR1B	2	97155939	98164044	4682.04	0.36961	3.57443	0.40261	3.57443	0.40261	6.9077e-15	0.725376	1.15537e+06	0.237104	1.55175	0.212878
ACTR2	2	64727788	65771253	44034	0.256417	19.6171	0.76164	19.6171	0.76164	1.28635e-13	0.762126	1.21447e+06	0.479894	NA	NA
ACTR3	2	113390063	114462596	3550.19	0.878133	5.74985	0.560544	5.74985	0.560544	1.4896e-14	0.883532	1.0562e+06	0.196638	1.5743	0.209583
ACTR3B	7	152259749	153355378	39983.4	0.343532	19.7209	0.755179	19.7209	0.755179	1.85832e-13	0.380748	568163	0.138339	NA	NA
ACTR3C	7	149743916	150823725	32596.1	0.34881	22.1607	0.471945	22.1607	0.471945	2.23055e-13	0.0615642	469268	0.453851	NA	NA
ACTR5	20	38248460	39272520	32500.9	0.129289	31.084	0.1033	31.084	0.1033	1.5833e-13	0.0540004	2.15054e+06	0.00758455	2.66763	0.102408
ACTR6	12	99699122	100741865	13311.1	0.372132	14.1829	0.447588	14.1829	0.447588	6.83156e-14	0.682554	1.1043e+06	0.217543	0.664371	0.415021
ACTR8	3	53367066	54382152	26098.3	0.537429	28.2776	0.450941	28.2776	0.450941	9.81412e-14	0.457766	1.63897e+06	0.215222	NA	NA
ACTRT2	1	2521467	3522903	8764.27	0.969672	11.9914	0.962711	11.9914	0.962711	4.06368e-14	0.937784	1.51137e+06	0.447431	2.06068	0.151142
ACTRT3	3	169266921	170269561	18996.7	0.40311	21.7024	0.0626704	21.7024	0.0626704	1.1701e-13	0.146354	940897	0.000834425	1.83727	0.175271
ACVR1	2	157236251	158376330	10850.7	0.504664	9.89747	0.334651	9.89747	0.334651	6.86161e-14	0.372406	570011	0.65335	0.167615	0.68224
ACVR1B	12	51451699	52497078	71662.7	0.309627	28.3396	0.565051	28.3396	0.565051	1.45385e-13	0.737631	1.63484e+06	0.4753	NA	NA
ACVR1C	2	157026767	158128864	8470.28	0.56209	10.9866	0.300895	10.9866	0.300895	4.51286e-14	0.402056	615647	0.354097	0.105136	0.745751
ACVR2A	2	147344517	148430826	18315	0.105646	7.99257	0.16379	7.99257	0.16379	8.17426e-14	0.00664371	708152	0.143277	0.925406	0.336059
ACVR2B	3	37953890	38993142	8848.17	0.986748	12.7619	0.85424	12.7619	0.85424	8.2375e-14	0.763656	2.13511e+06	0.0210567	NA	NA
ACVRL1	12	51406908	52423361	70382	0.311773	24.4039	0.610907	24.4039	0.610907	1.41789e-13	0.738426	1.56924e+06	0.449167	NA	NA
ACY1	3	51483340	52489197	10300.6	0.00788487	11.4515	0.0610442	11.4515	0.0610442	7.48713e-14	0.0642603	1.58116e+06	0.477468	0.119014	0.730106
ACY3	11	67142555	68150730	5546.27	0.447059	7.48071	0.195472	7.48071	0.195472	1.9172e-14	0.262714	1.27993e+06	0.540563	0.0446985	0.832559
ACYP1	14	74553237	75569483	9748.2	0.968679	24.6624	0.429724	24.6624	0.429724	6.33043e-14	0.854057	1.02481e+06	0.434394	NA	NA
ACYP2	2	53470838	54805300	51158.6	0.0768408	16.4235	0.590135	16.4235	0.590135	8.47102e-14	0.705764	2.22354e+06	0.159506	NA	NA
ADA	20	44084896	45152252	36731.9	0.200372	57.8041	0.076935	57.8041	0.076935	1.89209e-13	0.503122	1.43279e+06	0.655703	NA	NA
ADA2	22	16678790	17758235	22570.5	0.804718	36.0794	0.451133	36.0794	0.451133	2.27225e-13	0.051181	2.08176e+06	0.020324	NA	NA
ADAD1	4	121878966	122929802	19561.3	0.154525	9.22666	0.45459	9.22666	0.45459	4.94171e-14	0.579248	706903	0.786498	0.631098	0.426953
ADAD2	16	83691138	84697168	43078.9	0.845869	44.2719	0.784886	44.2719	0.784886	2.21088e-13	0.905985	1.16213e+06	0.777541	NA	NA
ADAL	15	42830672	43854569	171.449	0.646976	0.464445	0.605439	0.464445	0.605439	1.3436e-15	0.853453	1.29478e+06	0.841683	0.483859	0.486679
ADAM10	15	58088809	59249791	14383.1	0.920277	11.1261	0.912146	11.1261	0.912146	5.58144e-14	0.905283	1.54439e+06	0.41599	NA	NA
ADAM11	17	44258988	45281846	36379.1	0.0928098	11.5608	0.657315	11.5608	0.657315	1.4052e-13	0.062833	1.31334e+06	0.84369	0.111985	0.737896
ADAM12	10	125512381	126888477	94148	0.0836403	40.7629	0.705234	40.7629	0.705234	3.30588e-13	0.171174	896966	0.75352	NA	NA
ADAM15	1	154550566	155562775	25170.9	0.817901	16.6885	0.448246	16.6885	0.448246	4.62627e-14	0.754915	430113	0.667494	NA	NA
ADAM17	2	8988486	10056732	42752.1	0.310833	21.4572	0.673944	21.4572	0.673944	2.67408e-13	0.0147443	1.39305e+06	0.58038	NA	NA
ADAM18	8	39084489	40230065	53816	0.0508477	18.2681	0.0595193	18.2681	0.0595193	1.33386e-13	0.115057	1.66048e+06	0.625501	NA	NA
ADAM19	5	156895534	158075775	57925.4	0.0580698	22.3064	0.021561	22.3064	0.021561	2.78688e-13	0.00778867	675955	0.264096	NA	NA
ADAM2	8	39243735	40338227	56721.7	0.0462239	19.3373	0.0979897	19.3373	0.0979897	1.36928e-13	0.147013	1.65547e+06	0.564663	NA	NA
ADAM20	14	70022358	71035015	34964.1	0.179182	17.34	0.343149	17.34	0.343149	1.75364e-13	0.0490947	1.11639e+06	0.888458	0.766962	0.381159
ADAM21	14	69917107	70960427	36948.3	0.185124	18.1036	0.190246	18.1036	0.190246	1.75468e-13	0.0490202	1.12241e+06	0.898901	NA	NA
ADAM22	7	87434143	88702889	14638.6	0.476894	11.8723	0.329468	11.8723	0.329468	5.58627e-14	0.483899	1.43341e+06	0.600074	0.421538	0.51617
ADAM23	2	205943532	207121127	38203.8	0.711981	30.7535	0.197816	30.7535	0.197816	1.84059e-13	0.136843	142387	0.363554	NA	NA
ADAM28	8	23794069	24859014	12083.5	0.751692	5.59477	0.946419	5.59477	0.946419	3.37757e-14	0.9036	2.51144e+06	0.0742673	0.415006	0.51944
ADAM29	4	174329668	175478180	13359.4	0.589966	10.14	0.5783	10.14	0.5783	1.14469e-13	0.673952	235625	0.965775	NA	NA
ADAM30	1	119393533	120396515	10499.7	0.507826	15.0967	0.53782	15.0967	0.53782	4.58366e-14	0.72134	802775	0.338019	0.88927	0.345675
ADAM32	8	38606990	39784917	17203.2	0.284635	16.9193	0.366955	16.9193	0.366955	1.48513e-13	0.196427	1.8277e+06	0.222183	NA	NA
ADAM33	20	3167965	4182246	21354	0.584736	19.0276	0.591725	19.0276	0.591725	1.59606e-13	0.712166	1.72198e+06	0.0975403	NA	NA
ADAM7	8	23940930	25026970	16149.1	0.696986	7.17782	0.886392	7.17782	0.886392	3.81849e-14	0.970528	2.53944e+06	0.0544872	0.644387	0.422127
ADAM8	10	132762420	133776868	4821.01	0.988572	6.69998	0.928515	6.69998	0.928515	3.47342e-14	0.841112	699371	0.605409	1.5551	0.212385
ADAM9	8	38496754	39605445	20115.6	0.282874	18.7634	0.319149	18.7634	0.319149	1.6993e-13	0.210658	2.07587e+06	0.025557	NA	NA
ADAMDEC1	8	23884285	24906013	14050.9	0.684695	8.95857	0.809336	8.95857	0.809336	3.74945e-14	0.929511	2.43476e+06	0.0623538	0.591885	0.441691
ADAMTS1	21	26335755	27345409	27405.3	0.776216	31.5252	0.80921	31.5252	0.80921	1.86414e-13	0.713092	1.71634e+06	0.45402	NA	NA
ADAMTS10	19	8080240	9110735	21173.5	0.497746	23.543	0.703494	23.543	0.703494	1.0465e-13	0.619521	1.97245e+06	0.0411387	NA	NA
ADAMTS12	5	33023535	34392019	27733.7	0.361821	19.1908	0.573967	19.1908	0.573967	9.20449e-14	0.377417	2.85513e+06	0.0276122	NA	NA
ADAMTS13	9	132914358	133959402	29271.9	0.577191	23.9246	0.473529	23.9246	0.473529	1.2766e-13	0.515326	681077	0.667117	NA	NA
ADAMTS14	10	70172506	71262441	33907.9	0.761116	32.7857	0.39398	32.7857	0.39398	1.04339e-13	0.958644	1.36911e+06	0.622448	NA	NA
ADAMTS15	11	129948645	130976645	29963.1	0.419639	28.2081	0.203429	28.2081	0.203429	3.09724e-13	0.0165734	982232	0.401601	NA	NA
ADAMTS16	5	4640330	5820304	50390.4	0.0798016	60.7987	0.0917037	60.7987	0.0917037	4.78275e-13	0.0325505	2.22729e+06	0.2576	NA	NA
ADAMTS17	15	99471437	100842005	32090.8	0.89655	37.9903	0.754946	37.9903	0.754946	2.31405e-13	0.652129	1.42738e+06	0.33175	NA	NA
ADAMTS18	16	76747813	77935034	94220.7	0.11976	67.7451	0.0382371	67.7451	0.0382371	3.3879e-13	0.117422	1.71269e+06	0.779914	NA	NA
ADAMTS19	5	128960281	130238683	8795.33	0.60145	8.17911	0.785018	8.17911	0.785018	5.55456e-14	0.79912	1.14111e+06	0.118103	1.65916	0.197717
ADAMTS2	5	178610853	179845461	58715	0.260636	34.1695	0.270958	34.1695	0.270958	2.47871e-13	0.270849	455071	0.252301	NA	NA
ADAMTS20	12	42853866	44052203	49984.7	0.0415927	22.2635	0.0715155	22.2635	0.0715155	4.21769e-13	0.021035	1.5564e+06	0.837184	2.00367	0.156919
ADAMTS3	4	71780969	73069221	3599.94	0.927022	14.2737	0.127144	14.2737	0.127144	1.33986e-13	0.0727101	1.76347e+06	0.315756	0.249154	0.617672
ADAMTS4	1	160684302	161699054	123265	0.033892	17.691	0.380533	17.691	0.380533	2.14875e-13	0.112279	320477	0.97979	0.456473	0.499278
ADAMTS5	21	26417922	27467088	26946.2	0.774061	32.9086	0.814809	32.9086	0.814809	1.78102e-13	0.679429	1.68453e+06	0.577959	NA	NA
ADAMTS6	5	64648738	65981920	15473.4	0.769248	8.53047	0.719683	8.53047	0.719683	5.29983e-14	0.430784	1.74997e+06	0.239783	2.68602	0.101233
ADAMTS7	15	78259206	79311464	32067.2	0.530886	29.9545	0.0779461	29.9545	0.0779461	1.14449e-13	0.433991	1.7833e+06	0.488965	NA	NA
ADAMTS8	11	129904923	130928609	29979.5	0.424765	28.2349	0.212711	28.2349	0.212711	3.09727e-13	0.0165874	1.00746e+06	0.327019	NA	NA
ADAMTS9	3	64015654	65188000	78249.7	0.0705663	27.5172	0.256769	27.5172	0.256769	1.57386e-13	0.338073	1.3282e+06	0.459287	NA	NA
ADAMTSL1	9	17406563	19410950	63598.7	0.145399	80.8709	0.201953	80.8709	0.201953	4.90468e-13	0.0507572	3.69902e+06	0.0253048	NA	NA
ADAMTSL2	9	133032164	134075519	19963	0.767411	21.6356	0.459991	21.6356	0.459991	1.01659e-13	0.686433	617199	0.8346	NA	NA
ADAMTSL3	15	83154088	84539842	23342.9	0.352132	21.59	0.150551	21.59	0.150551	4.27067e-14	0.681919	1.63583e+06	0.813842	3.07504	0.0795024
ADAMTSL4	1	150049369	151060937	9344.55	0.30543	1.74355	0.792027	1.74355	0.792027	2.22665e-14	0.596718	484515	0.479669	0.0158983	0.899662
ADAMTSL5	19	1005022	2013604	14566.7	0.52859	23.3974	0.613901	23.3974	0.613901	1.25883e-13	0.515911	1.20471e+06	0.73534	0.493201	0.482503
ADAP1	7	397900	1455407	6722.81	0.696895	2.84312	0.756024	2.84312	0.756024	1.86994e-14	0.693581	1.25267e+06	0.537284	0.6686	0.41354
ADAP2	17	30406344	31459322	35301.9	0.0497009	11.5413	0.0892411	11.5413	0.0892411	9.11353e-14	0.172334	1.91996e+06	0.196346	0.68602	0.407521
ADAR	1	154081695	155128013	22863.8	0.883017	15.7899	0.559405	15.7899	0.559405	3.32545e-14	0.971753	471806	0.627866	NA	NA
ADARB1	21	44573853	45726560	35050.6	0.655927	45.3358	0.0763577	45.3358	0.0763577	1.48386e-13	0.581697	1.55157e+06	0.646448	NA	NA
ADARB2	10	677313	2237525	42084.5	0.974742	43.2709	0.748811	43.2709	0.748811	1.86105e-13	0.927425	1.97085e+06	0.525573	NA	NA
ADAT1	16	75096868	76123300	11827.9	0.703493	6.48781	0.503803	6.48781	0.503803	1.32654e-13	0.181498	1.51984e+06	0.129801	0.825601	0.363547
ADAT2	6	142922832	143950695	40005.8	0.370097	23.949	0.416698	23.949	0.416698	1.98548e-13	0.0558749	475247	0.597198	NA	NA
ADAT3	19	1405399	2413447	9153.1	0.820248	39.6706	0.0320945	39.6706	0.0320945	9.15147e-14	0.551781	1.42676e+06	0.288523	0.841139	0.359072
ADCK1	14	77300109	78435014	40174.4	0.157133	39.6163	0.113129	39.6163	0.113129	1.71547e-13	0.219469	1.47553e+06	0.934833	NA	NA
ADCK2	7	140172945	141196261	10458.9	0.489242	80.8777	0.00270886	80.8777	0.00270886	1.65704e-13	0.0335791	423720	0.390503	0.0452476	0.831549
ADCK5	8	143873101	144893242	7530.84	0.793933	0.850404	0.914811	0.850404	0.914811	7.12316e-15	0.668483	462182	0.386159	0.746027	0.387737
ADCY1	7	45074140	46223116	23442.6	0.48818	23.3197	0.122271	23.3197	0.122271	7.11648e-14	0.729961	1.56306e+06	0.215827	NA	NA
ADCY10	1	167309386	168414215	25519.9	0.495869	23.7484	0.704695	23.7484	0.704695	1.39442e-13	0.792206	550934	0.31851	NA	NA
ADCY2	5	6896138	8330081	50926.7	0.609162	36.7224	0.109298	36.7224	0.109298	2.42082e-13	0.639169	2.48552e+06	0.271497	NA	NA
ADCY3	2	24319169	25420237	14594.6	0.624768	12.2898	0.404194	12.2898	0.404194	3.42902e-14	0.169902	2.10236e+06	0.108351	1.72592	0.188933
ADCY4	14	23818349	24835093	8876.94	0.951849	5.83872	0.990902	5.83872	0.990902	2.96375e-14	0.98424	2.39085e+06	0.0906969	1.79568	0.180236
ADCY5	3	122782296	123949090	26851.6	0.337236	29.723	0.104904	29.723	0.104904	1.788e-13	0.185007	1.0088e+06	0.410939	0.00305359	0.955932
ADCY6	12	48266194	49289089	6395.17	0.598611	3.5104	0.918677	3.5104	0.918677	3.30434e-14	0.632886	1.22655e+06	0.567067	0.114224	0.735385
ADCY7	16	49746137	50818135	18034.8	0.644438	15.683	0.393395	15.683	0.393395	1.29797e-13	0.423838	988083	0.746339	0.220518	0.638646
ADCY8	8	130280301	131540909	23120.5	0.974115	21.2211	0.689506	21.2211	0.689506	1.1948e-13	0.877418	1.25211e+06	0.215285	NA	NA
ADCY9	16	3453387	4616442	43969.8	0.312684	17.0448	0.589819	17.0448	0.589819	2.10792e-13	0.0570226	1.92092e+06	0.544076	NA	NA
ADCYAP1	18	404871	1412172	18354.5	0.943251	28.3162	0.620504	28.3162	0.620504	1.02695e-13	0.952339	1.19354e+06	0.558383	NA	NA
ADCYAP1R1	7	30552308	31611474	22381.2	0.920977	12.2843	0.973177	12.2843	0.973177	7.60911e-14	0.883413	2.03118e+06	0.071663	NA	NA
ADD1	4	2343844	3430076	12675.6	0.537653	13.3121	0.531833	13.3121	0.531833	3.76942e-14	0.473348	1.56009e+06	0.574931	0.0964197	0.756169
ADD2	2	70107618	71268225	29506.1	0.376061	32.6057	0.193845	32.6057	0.193845	1.31043e-13	0.324669	1.4939e+06	0.529077	NA	NA
ADD3	10	109496368	110635565	20436.2	0.34321	28.0654	0.0361347	28.0654	0.0361347	1.09841e-13	0.216388	1.0233e+06	0.551681	6.07588	0.0137041
ADGB	6	146098967	147315462	14687.3	0.858431	11.9249	0.47826	11.9249	0.47826	5.71226e-14	0.716278	866327	0.00750412	NA	NA
ADGRA1	10	132587924	133631675	5759.1	0.988469	7.82412	0.927054	7.82412	0.927054	3.98218e-14	0.820617	800377	0.298046	1.55919	0.211784
ADGRA2	8	37284191	38344896	4586.97	0.719386	3.97866	0.631262	3.97866	0.631262	4.79487e-14	0.654974	1.59853e+06	0.407357	0.682955	0.408571
ADGRA3	4	21845071	23016066	22959.3	0.310167	20.2307	0.269481	20.2307	0.269481	6.37983e-14	0.456506	1.87472e+06	0.603264	0.732039	0.392223
ADGRB1	8	141949430	143045009	22300	0.588289	8.43851	0.738374	8.43851	0.738374	9.49149e-14	0.284724	821583	0.0844121	NA	NA
ADGRB2	1	31227117	32264893	79338.8	0.0886372	5.43474	0.567757	5.43474	0.567757	7.87728e-14	0.0469209	1.76552e+06	0.141276	1.65097	0.198828
ADGRB3	6	68135282	69890571	49737.4	0.138269	24.9297	0.388885	24.9297	0.388885	1.89167e-13	0.326694	2.94218e+06	0.00587031	NA	NA
ADGRD1	12	130453907	131641469	92251.1	0.027371	70.0592	0.206834	70.0592	0.206834	3.63369e-13	0.033365	1.15311e+06	0.168277	NA	NA
ADGRD2	9	123950451	124978589	37526.8	0.109518	12.9126	0.463385	12.9126	0.463385	6.50355e-14	0.776033	766263	0.484947	2.12081	0.14531
ADGRE1	19	6387566	7440459	17710.5	0.492122	31.5295	0.311032	31.5295	0.311032	2.12137e-13	0.227469	NA	NA	NA	NA
ADGRE2	19	14232392	15278560	22890.8	0.569355	33.8043	0.265543	33.8043	0.265543	1.76612e-13	0.412535	1.89443e+06	0.138625	NA	NA
ADGRE3	19	14119117	15190027	22910.1	0.588506	33.8699	0.324575	33.8699	0.324575	1.75695e-13	0.435934	1.94839e+06	0.210076	NA	NA
ADGRE5	19	13880501	14908725	17187	0.409465	27.4739	0.269031	27.4739	0.269031	1.34002e-13	0.204715	1.85792e+06	0.306958	NA	NA
ADGRF1	6	46497708	47542350	12809.5	0.89012	9.19366	0.877508	9.19366	0.877508	4.0568e-14	0.927932	1.16379e+06	0.824446	NA	NA
ADGRF3	2	25808173	26846817	77151	0.00297495	34.9369	0.00983458	34.9369	0.00983458	2.13346e-13	0.00857176	1.90001e+06	0.475884	0.249704	0.617284
ADGRF4	6	47185864	48222021	9815.18	0.478356	20.508	0.289615	20.508	0.289615	3.88145e-14	0.535546	1.26797e+06	0.401645	0.00139676	0.970187
ADGRF5	6	46352522	47454943	13043.4	0.887581	9.23876	0.875686	9.23876	0.875686	4.06837e-14	0.927635	1.28981e+06	0.788404	NA	NA
ADGRG1	16	57110652	58165580	32564.7	0.390664	29.6005	0.178407	29.6005	0.178407	1.88383e-13	0.217714	1.57385e+06	0.603858	NA	NA
ADGRG3	16	57168277	58189378	32317.2	0.383318	29.5972	0.178348	29.5972	0.178348	1.88335e-13	0.217559	1.48142e+06	0.682699	NA	NA
ADGRG5	16	57042643	58091681	39300.5	0.313696	32.3965	0.164455	32.3965	0.164455	1.97107e-13	0.234605	1.54769e+06	0.565881	NA	NA
ADGRG6	6	141801854	142946266	59965.2	0.0607247	28.5191	0.0339897	28.5191	0.0339897	9.33885e-14	0.235267	757683	0.136156	3.06886	0.079805
ADGRG7	3	100109601	101195479	10625.6	0.767347	11.4048	0.335615	11.4048	0.335615	6.20029e-14	0.655661	1.22506e+06	0.11758	2.76148	0.0965584
ADGRL1	19	13647743	14706187	13889.1	0.271129	31.4238	0.112695	31.4238	0.112695	1.27861e-13	0.176539	2.05727e+06	0.13838	0.487934	0.484851
ADGRL2	1	80806147	82493932	51696.8	0.234349	20.7928	0.824354	20.7928	0.824354	2.48877e-13	0.224144	2.16419e+06	0.316034	NA	NA
ADGRL3	4	60700326	62578335	32054.3	0.677689	23.9836	0.498926	23.9836	0.498926	1.82182e-13	0.0437111	2.41505e+06	0.560403	NA	NA
ADGRL4	1	78389764	79782124	12120.1	0.386194	20.7513	0.0273246	20.7513	0.0273246	8.38125e-14	0.41678	2.49619e+06	0.227247	3.31381	0.0687005
ADGRV1	5	90029344	91664437	24532.6	0.193871	8.67832	0.82954	8.67832	0.82954	1.19934e-13	0.123918	1.5969e+06	0.832639	0.0219461	0.882231
ADH1A	4	98776369	99791003	9898.51	0.608395	18.3598	0.374494	18.3598	0.374494	4.54765e-14	0.538303	1.19619e+06	0.28808	0.344261	0.55738
ADH1B	4	98804971	99821401	14098	0.270557	17.2953	0.390371	17.2953	0.390371	5.91717e-14	0.348042	1.16907e+06	0.27765	0.363374	0.546638
ADH1C	4	98836497	99852746	14595.6	0.341485	17.2357	0.409878	17.2357	0.409878	5.9215e-14	0.351958	1.10327e+06	0.41427	0.433324	0.510363
ADH4	4	98623657	99657792	10553.8	0.791908	18.5472	0.404004	18.5472	0.404004	4.66438e-14	0.702542	1.23531e+06	0.339582	0.286307	0.592596
ADH5	4	98570978	99588801	10971.1	0.801137	19.4414	0.395695	19.4414	0.395695	5.38837e-14	0.696135	1.24745e+06	0.314274	0.304873	0.580843
ADH6	4	98702638	99719537	10145.7	0.750996	18.3535	0.385918	18.3535	0.385918	4.54522e-14	0.674808	1.25027e+06	0.319372	0.38988	0.532362
ADH7	4	98912261	99935510	14595.6	0.341485	17.2357	0.409878	17.2357	0.409878	5.9215e-14	0.351958	1.06995e+06	0.484844	0.507005	0.476439
ADHFE1	8	65932492	66968907	1275.67	0.985416	2.2003	0.961831	2.2003	0.961831	1.42607e-14	0.913454	1.60805e+06	0.07744	2.88515	0.0894005
ADI1	2	2997366	4019531	112172	0.0562675	23.931	0.374949	23.931	0.374949	2.9891e-13	0.0740459	1.73428e+06	0.0718252	NA	NA
ADIG	20	38081195	39088463	32349.9	0.301399	30.0987	0.114715	30.0987	0.114715	1.5775e-13	0.0530094	2.19172e+06	0.00745293	4.00115	0.0454695
ADIPOQ	3	186342704	187358463	40712.7	0.667237	64.2675	0.142002	64.2675	0.142002	1.72557e-13	0.562081	175155	0.967863	NA	NA
ADIPOR1	1	202440826	203458572	63673	0.12355	14.6318	0.594133	14.6318	0.594133	2.93266e-13	0.0274036	163285	0.272109	NA	NA
ADIPOR2	12	1188574	2288674	37701.9	0.00620268	48.7033	0.0159348	48.7033	0.0159348	2.27362e-13	0.0751965	1.46925e+06	0.443094	NA	NA
ADIRF	10	86468432	87483934	11001.9	0.359247	9.74867	0.126375	9.74867	0.126375	1.83937e-14	0.558661	1.30362e+06	0.072276	0.00122069	0.972129
ADISSP	20	3253508	4267781	24420.8	0.554293	19.171	0.399808	19.171	0.399808	1.59232e-13	0.655015	1.81308e+06	0.0787677	NA	NA
ADK	10	73651202	75209963	10518.5	0.291532	9.02454	0.470162	9.02454	0.470162	1.20737e-14	0.413546	2.14637e+06	0.34869	0.192192	0.661098
ADM	11	9805073	10807397	66854.2	0.210557	18.5681	0.280205	18.5681	0.280205	2.37671e-13	0.000257411	1.6963e+06	0.254347	NA	NA
ADM5	19	49189594	50190575	23062	0.00714598	9.92055	0.396198	9.92055	0.396198	2.61977e-13	0.0270515	878164	0.746741	0.705684	0.400881
ADNP	20	50388916	51431437	26969.3	0.5905	30.3085	0.347379	30.3085	0.347379	1.33308e-13	0.792714	1.39828e+06	0.330988	NA	NA
ADNP2	18	79609262	80647523	15940.7	0.14789	2.17082	0.817178	2.17082	0.817178	6.81213e-14	0.635912	1.71506e+06	0.151695	0.938083	0.332771
ADO	10	62304720	63308479	69668.4	0.00203758	13.1241	0.731068	13.1241	0.731068	4.378e-14	0.434646	1.25695e+06	0.23835	1.02021	0.31247
ADORA1	1	202590654	203667405	64517.2	0.133231	17.5979	0.640056	17.5979	0.640056	3.02412e-13	0.0338874	193850	0.323033	NA	NA
ADORA2A	22	23917879	24942357	23606.4	0.506088	21.5535	0.166408	21.5535	0.166408	6.48485e-14	0.618891	2.43267e+06	0.0621404	NA	NA
ADORA2B	17	15445130	16475746	20435	0.0620642	7.46659	0.487522	7.46659	0.487522	9.30549e-14	0.121231	1.58321e+06	0.497322	0.636248	0.425072
ADORA3	1	110999429	112003633	75436	0.149107	20.7451	0.467063	20.7451	0.467063	2.19362e-13	0.482058	1.10837e+06	0.153276	NA	NA
ADPGK	15	72251294	73285846	4535.18	0.474544	0.81081	0.65457	0.81081	0.65457	2.21216e-14	0.667496	1.25884e+06	0.334989	0.742766	0.388776
ADPRH	3	119079268	120089945	14107.6	0.820837	7.01321	0.87441	7.01321	0.87441	2.44378e-14	0.948798	689361	0.954419	NA	NA
ADPRHL1	13	112899611	113953488	11853.9	0.819628	17.4826	0.66111	17.4826	0.66111	5.64936e-14	0.886681	1.25624e+06	0.233623	NA	NA
ADPRM	17	10197594	11211558	24589.5	0.650754	26.512	0.340056	26.512	0.340056	2.2304e-13	0.241674	1.75876e+06	0.149096	NA	NA
ADPRS	1	35588892	36593932	4056.05	0.442621	2.54993	0.960405	2.54993	0.960405	8.38921e-14	0.504052	1.68532e+06	0.401811	4.10349	0.0427947
ADRA1A	8	26248150	27367278	33555.5	0.321539	22.3584	0.199653	22.3584	0.199653	9.50479e-14	0.981967	1.93197e+06	0.41285	NA	NA
ADRA1B	5	159365080	160473012	27753.1	0.505933	27.1462	0.668468	27.1462	0.668468	2.2629e-13	0.306711	664142	0.314037	NA	NA
ADRA1D	20	3720630	4749287	49236.8	0.656661	26.1886	0.470587	26.1886	0.470587	2.33294e-13	0.570879	1.79353e+06	0.612561	NA	NA
ADRA2A	10	110577029	111580907	59511.2	0.0174447	21.4201	0.491743	21.4201	0.491743	1.37057e-13	0.132855	814912	0.576507	0.00331971	0.954054
ADRA2B	2	95612876	96616571	1516.88	0.789274	3.21455	0.476025	3.21455	0.476025	2.94077e-15	0.822288	1.08359e+06	0.377696	0.682938	0.408577
ADRA2C	4	3266348	4268526	15275.8	0.735355	25.4519	0.568761	25.4519	0.568761	9.18006e-14	0.800704	1.75649e+06	0.101229	NA	NA
ADRB1	10	113543866	114546904	61062.9	0.0558194	23.4494	0.463345	23.4494	0.463345	1.63061e-13	0.268099	1.04082e+06	0.124787	NA	NA
ADRB2	5	148326611	149328623	31836.1	0.415218	16.7342	0.716142	16.7342	0.716142	9.0422e-14	0.682646	377300	0.536602	NA	NA
ADRB3	8	37462990	38466599	2951.69	0.837911	4.03806	0.771336	4.03806	0.771336	2.64479e-14	0.83622	1.64205e+06	0.242249	0.630016	0.427349
ADRM1	20	61802093	62808862	16845.1	0.666291	34.571	0.381781	34.571	0.381781	1.32321e-13	0.325717	1.05501e+06	0.73542	NA	NA
ADSL	22	39846461	40890463	11544.4	0.0835497	28.4566	0.0149481	28.4566	0.0149481	2.21256e-13	0.0435293	1.93381e+06	0.128303	7.18649	0.00734548
ADSS1	14	104224174	105247325	7650.35	0.682976	24.6229	0.309376	24.6229	0.309376	1.42374e-13	0.136754	981304	0.408001	0.115293	0.734196
ADSS2	1	243908494	244951909	26596.9	0.775418	26.1667	0.487388	26.1667	0.487388	1.59028e-13	0.59186	108839	0.0282026	NA	NA
ADTRP	6	11212054	12307046	20171.3	0.863634	26.177	0.565698	26.177	0.565698	1.42286e-13	0.685018	1.71846e+06	0.365901	NA	NA
AEBP1	7	43604345	44614562	1999.1	0.972574	1.68107	0.995335	1.68107	0.995335	2.63752e-14	0.989617	1.35112e+06	0.633066	0.0908271	0.763129
AEBP2	12	18904045	20220801	26156.1	0.496298	62.0915	0.0547468	62.0915	0.0547468	2.06868e-13	0.163198	2.98974e+06	0.010841	NA	NA
AEN	15	88121337	89132281	18299.8	0.591023	25.3434	0.450843	25.3434	0.450843	6.60547e-14	0.919377	1.23095e+06	0.496155	NA	NA
AFAP1	4	7258714	8439926	71957.4	0.371135	36.7359	0.673674	36.7359	0.673674	3.88529e-13	0.507545	1.99955e+06	0.353447	NA	NA
AFAP1L1	5	148771859	149843637	33508.2	0.499647	19.5348	0.66625	19.5348	0.66625	9.56949e-14	0.771223	388949	0.354559	NA	NA
AFAP1L2	10	113794824	114904756	65317.2	0.0344648	19.0701	0.517399	19.0701	0.517399	1.53525e-13	0.123322	1.33561e+06	0.0246474	NA	NA
AFDN	6	167326893	168472023	36339	0.130879	55.8004	0.0594563	55.8004	0.0594563	1.56688e-13	0.0415509	586738	0.290199	NA	NA
AFF1	4	86435002	87641039	6830.36	0.984186	6.70086	0.811595	6.70086	0.811595	1.98053e-14	0.983251	1.48666e+06	0.157965	0.409913	0.522014
AFF3	2	99045419	100692428	22354.9	0.725859	8.56173	0.590456	8.56173	0.590456	8.22446e-14	0.106938	1.8443e+06	0.143764	NA	NA
AFF4	5	132375395	133463634	30140	0.577802	25.2176	0.228513	25.2176	0.228513	2.24808e-13	0.0574736	810209	0.36982	NA	NA
AFG1L	6	107794991	109026796	38682.1	0.0405516	29.9754	0.0320544	29.9754	0.0320544	1.26064e-13	0.086532	1.20017e+06	0.294085	4.01399	0.0451243
AFG3L2	18	11828944	12877227	20663.2	0.197935	43.1533	0.100678	43.1533	0.100678	1.59295e-13	0.41199	1.53729e+06	0.348067	0.207532	0.648709
AFM	4	72981745	74004001	2218.72	0.971811	6.97343	0.539998	6.97343	0.539998	5.13116e-15	0.978524	1.4748e+06	0.494146	0.00421929	0.948209
AFMID	17	77687358	78707702	75297.8	0.181917	33.7549	0.636735	33.7549	0.636735	1.95422e-13	0.55339	1.34684e+06	0.879418	NA	NA
AFP	4	72931138	73956174	1715.61	0.976956	6.88248	0.530367	6.88248	0.530367	5.01046e-15	0.97495	1.48616e+06	0.392846	0.00562844	0.940196
AFTPH	2	64024299	65093005	27458.3	0.545249	26.896	0.507816	26.896	0.507816	1.33519e-13	0.825141	1.25765e+06	0.427247	NA	NA
AGA	4	176930774	177942437	20235.3	0.80317	35.1177	0.541883	35.1177	0.541883	1.00336e-13	0.709576	293948	0.609423	NA	NA
AGAP1	2	234994043	236631793	66385.9	0.0815825	48.5463	0.182755	48.5463	0.182755	2.52953e-13	0.769989	168130	0.716326	NA	NA
AGAP2	12	57223761	58242157	7286.65	0.388005	11.4325	0.204795	11.4325	0.204795	6.76986e-14	0.0702907	1.47234e+06	0.686692	0.0863783	0.768833
AGAP3	7	150585831	151644436	40096.8	0.355866	33.0045	0.532284	33.0045	0.532284	2.65731e-13	0.120676	604271	0.348876	NA	NA
AGAP4	10	45325594	46353875	27411.8	0.0242667	11.6801	0.239996	11.6801	0.239996	7.96303e-14	0.1726	1.48541e+06	0.070085	2.62293	0.10533
AGAP5	10	73174287	74198109	8326.1	0.210338	6.57566	0.186894	6.57566	0.186894	4.01592e-15	0.173056	1.52232e+06	0.435922	0.198229	0.656154
AGAP6	10	49482190	50511654	19102.8	0.382595	22.2438	0.0123685	22.2438	0.0123685	2.04848e-13	0.0186171	1.00976e+06	0.630647	2.70613	0.0999632
AGAP9	10	47001854	48023638	21622.5	0.348443	11.7229	0.176247	11.7229	0.176247	2.3252e-14	0.624929	1.32197e+06	0.250056	1.80472	0.179143
AGBL1	15	85579871	87549169	49482.1	0.334753	72.5285	0.0372023	72.5285	0.0372023	2.41584e-13	0.0291378	2.36333e+06	0.169731	NA	NA
AGBL2	11	47159591	48215389	1451.05	0.824565	0.599231	0.503186	0.599231	0.503186	2.22171e-15	0.686895	1.28354e+06	0.385799	0.0915001	0.762279
AGBL3	7	134486508	135647963	28370.3	0.742566	15.7243	0.755555	15.7243	0.755555	1.6932e-13	0.32494	774999	0.225042	NA	NA
AGBL4	1	48032854	50523954	48347.8	0.227829	18.4853	0.539224	18.4853	0.539224	1.63959e-13	0.138618	2.62554e+06	0.732454	NA	NA
AGBL5	2	26542364	27570622	66140.3	0.00317276	22.5339	0.103	22.5339	0.103	1.03071e-13	0.0331543	1.63152e+06	0.466502	2.67827	0.101726
AGER	6	31680968	32684322	21815.7	0.0808957	28.2762	0.0203017	28.2762	0.0203017	1.515e-13	0.0896867	1.6984e+06	0.0721994	0.238983	0.624941
AGFG1	2	226972152	228061217	31845.2	0.15529	36.2613	0.163757	36.2613	0.163757	2.04049e-13	0.416307	131984	0.569222	NA	NA
AGFG2	7	100039203	101068220	17032.9	0.043355	5.82476	0.384713	5.82476	0.384713	1.32064e-14	0.414938	1.11653e+06	0.219303	1.29687	0.254786
AGGF1	5	76529251	77565234	43051.4	0.286408	19.436	0.48718	19.436	0.48718	8.11329e-14	0.716972	1.76581e+06	0.380088	NA	NA
AGK	7	141051278	142155244	33713.7	0.256888	25.855	0.257054	25.855	0.257054	4.55883e-14	0.810388	672784	0.179681	NA	NA
AGL	1	99350361	100424023	16265.3	0.621453	3.65642	0.938097	3.65642	0.938097	4.84401e-14	0.826875	1.12156e+06	0.305425	0.861714	0.35326
AGMAT	1	15071699	16085051	15660.8	0.480386	22.6869	0.396876	22.6869	0.396876	1.05835e-13	0.3902	1.71786e+06	0.189989	0.184649	0.667409
AGMO	7	14700317	16062015	16749.6	0.895324	16.3972	0.78824	16.3972	0.78824	6.45144e-14	0.845769	2.24389e+06	0.198351	NA	NA
AGO1	1	35369808	36430532	1678.17	0.0897511	1.36806	0.576222	1.36806	0.576222	1.81206e-14	0.756742	1.83836e+06	0.349767	2.10809	0.146522
AGO2	8	140020156	141135633	24883.7	0.371398	8.86356	0.956934	8.86356	0.956934	5.94429e-14	0.837172	395916	0.618708	NA	NA
AGO3	1	35430718	36572500	3329.85	0.595827	2.48304	0.95881	2.48304	0.95881	6.6878e-14	0.676849	1.96623e+06	0.370883	2.29387	0.129886
AGO4	1	35308016	36357890	1658.51	0.0688428	0.874609	0.220105	0.874609	0.220105	1.34348e-14	0.649586	1.80694e+06	0.317655	2.01577	0.155672
AGPAT1	6	31668212	32678096	21815.7	0.0808957	28.2762	0.0203017	28.2762	0.0203017	1.515e-13	0.0896867	1.71993e+06	0.0626453	0.161428	0.687846
AGPAT2	9	136173143	137187457	15008	0.325524	13.3342	0.279215	13.3342	0.279215	1.60001e-13	0.163005	562190	0.453101	1.16991	0.279419
AGPAT3	21	43365223	44487592	9295.61	0.910192	7.99874	0.911159	7.99874	0.911159	2.477e-14	0.985054	1.51189e+06	0.590152	0.53868	0.46298
AGPAT4	6	160629967	161774061	49275.4	0.110259	26.0028	0.761873	26.0028	0.761873	1.44086e-13	0.767194	391614	0.97146	NA	NA
AGPAT5	8	6208642	7261503	80493.7	0.293725	35.0984	0.456117	35.0984	0.456117	2.04404e-13	0.634998	NA	NA	NA	NA
AGPS	2	176892746	178067024	18689.5	0.214366	6.75534	0.312754	6.75534	0.312754	4.14796e-14	0.445913	359710	0.690601	0.294337	0.587454
AGR2	7	16291811	17333433	40619.1	0.22796	49.848	0.372653	49.848	0.372653	8.54233e-14	0.838793	1.9019e+06	0.0417841	NA	NA
AGR3	7	16359412	17381987	40234.8	0.227732	48.72	0.373066	48.72	0.373066	7.14784e-14	0.877886	1.95857e+06	0.038748	NA	NA
AGRN	1	520120	1556118	1271.04	0.787403	0.97188	0.881965	0.97188	0.881965	2.92506e-15	0.806519	1.19164e+06	0.569008	1.48091	0.223632
AGRP	16	66982571	67983547	364.901	0.347741	0.647711	0.2512	0.647711	0.2512	8.56782e-17	0.803347	1.38523e+06	0.462426	3.57895	0.0585167
AGT	1	230190776	231245576	67871.2	0.211973	31.1214	0.77562	31.1214	0.77562	1.06995e-13	0.676415	248282	0.193459	NA	NA
AGTPBP1	9	85046539	86242029	8702.76	0.744084	9.63258	0.788204	9.63258	0.788204	5.22422e-14	0.896543	1.39972e+06	0.285163	2.82644	0.0927235
AGTR1	3	148197784	149243008	12193.4	0.864011	10.6629	0.638274	10.6629	0.638274	1.6406e-13	0.0900569	425589	0.377188	0.268522	0.604324
AGTRAP	1	11236084	12254802	43131.9	0.174666	31.5584	0.115731	31.5584	0.115731	3.54122e-13	0.0221509	1.49597e+06	0.555065	NA	NA
AGXT	2	240368824	241380502	14563.9	0.648951	31.7217	0.0524106	31.7217	0.0524106	1.68404e-13	0.0976315	68087.9	0.584334	NA	NA
AGXT2	5	34498101	35548135	15978.2	0.932891	15.7645	0.858737	15.7645	0.858737	6.78321e-14	0.916535	1.91048e+06	0.0162637	NA	NA
AHCTF1	1	246339098	247431948	18467.6	0.581714	34.3944	0.104878	34.3944	0.104878	2.72617e-13	0.0272199	44397.4	0.456088	NA	NA
AHCY	20	33780268	34811802	2067.23	0.886674	4.91847	0.322861	4.91847	0.322861	3.412e-14	0.381843	1.99519e+06	0.0600556	0.00740444	0.931427
AHCYL1	1	109484765	110523742	33403.2	0.577158	16.7892	0.924673	16.7892	0.924673	2.17761e-13	0.21906	975051	0.508405	NA	NA
AHCYL2	7	128725030	129930211	20146.2	0.721851	23.6514	0.143991	23.6514	0.143991	1.10539e-13	0.626204	1.04966e+06	0.14669	0.228114	0.632926
AHDC1	1	27034035	28104431	7262.76	0.389261	24.1273	0.0540399	24.1273	0.0540399	6.82221e-14	0.291466	1.75774e+06	0.664829	0.581654	0.445664
AHI1	6	134783407	135998434	12924.8	0.357129	9.62613	0.464968	9.62613	0.464968	1.61632e-14	0.757776	963431	0.0297477	12.5689	0.00039222
AHNAK	11	61933542	63056235	22918.7	0.363686	19.9731	0.359899	19.9731	0.359899	2.23362e-13	0.0942048	1.27579e+06	0.50265	4.45617	0.0347752
AHNAK2	14	104437244	105478374	5776.18	0.575332	12.2199	0.392945	12.2199	0.392945	1.38205e-13	0.147796	939908	0.691702	0.0435718	0.834652
AHR	7	16416359	17846152	53804.7	0.179808	67.6968	0.354066	67.6968	0.354066	1.15383e-13	0.86045	2.71144e+06	0.0179773	NA	NA
AHRR	5	1	938291	6583.79	0.216182	2.55379	0.798377	2.55379	0.798377	7.84917e-14	0.104437	1.02955e+06	0.453487	0.043529	0.834732
AHSA1	14	76957870	77969472	18249.3	0.477304	20.3567	0.458174	20.3567	0.458174	3.14073e-14	0.960321	1.45728e+06	0.715321	NA	NA
AHSG	3	186113060	187121318	36640.8	0.705848	67.7183	0.197063	67.7183	0.197063	1.68911e-13	0.76484	133664	0.998533	NA	NA
AHSP	16	31027900	32028803	3462.6	0.717675	3.44518	0.418763	3.44518	0.418763	2.13771e-14	0.748442	1.82156e+06	0.123414	2.84701	0.091544
AICDA	12	8102155	9113242	21628.8	0.540878	17.6361	0.681159	17.6361	0.681159	8.6306e-14	0.567217	1.96214e+06	0.0356808	3.35941	0.0668221
AIDA	1	222168013	223213210	24647.6	0.191761	33.6939	0.00350793	33.6939	0.00350793	9.67526e-14	0.108143	145470	0.269653	1.31573	0.25136
AIF1	6	31115217	32117021	22827	0.371541	22.0581	0.256553	22.0581	0.256553	9.17218e-14	0.281514	1.76842e+06	0.116077	NA	NA
AIF1L	9	130596476	131623152	18887	0.836311	23.277	0.244161	23.277	0.244161	1.65758e-13	0.352199	984414	0.178009	3.74052	0.053108
AIFM2	10	69598223	70632934	29131.3	0.818511	51.2603	0.339352	51.2603	0.339352	1.16049e-13	0.943173	1.30614e+06	0.364703	NA	NA
AIFM3	22	20465108	21481360	6295.57	0.936	14.3888	0.796455	14.3888	0.796455	3.2091e-14	0.943542	1.54958e+06	0.787482	0.273426	0.601042
AIG1	6	142560496	143841058	53370.1	0.201761	49.0849	0.0360632	49.0849	0.0360632	2.73344e-13	0.0235693	745630	0.302579	NA	NA
AIM2	1	158561599	159687843	22328.7	0.466142	15.9863	0.530676	15.9863	0.530676	1.32785e-13	0.223492	637362	0.358907	NA	NA
AIMP1	4	105815544	106849456	4306.18	0.899646	2.324	0.926187	2.324	0.926187	2.29589e-14	0.819957	1.12988e+06	0.594223	0.00594762	0.938527
AIMP2	7	5509255	6523834	12953.3	0.475661	7.30275	0.450451	7.30275	0.450451	1.38188e-13	0.219683	NA	NA	0.142501	0.705807
AIP	11	66968174	67991154	4637.95	0.523143	2.12854	0.370939	2.12854	0.370939	1.8444e-14	0.260916	1.39728e+06	0.463344	0.0400858	0.841313
AIPL1	17	5893693	6935199	57797.1	0.589915	31.8415	0.255735	31.8415	0.255735	4.61186e-13	0.0855495	NA	NA	NA	NA
AIRE	21	43785838	44798648	24765	0.72765	20.393	0.443536	20.393	0.443536	8.38825e-14	0.759459	1.43124e+06	0.462711	1.28101	0.257712
AJAP1	1	4154609	5292534	62568.7	0.331413	86.6709	0.222524	86.6709	0.222524	4.17506e-13	0.183734	1.94112e+06	0.602911	NA	NA
AJM1	9	136342478	137348801	14808.1	0.162032	11.8055	0.290385	11.8055	0.290385	1.63272e-13	0.102042	619622	0.488117	1.32766	0.249222
AJUBA	14	22471177	23482551	27659.4	0.699812	29.9037	0.54387	29.9037	0.54387	1.10638e-13	0.826715	1.53189e+06	0.825815	NA	NA
AK1	9	127366486	128377675	6148.35	0.884678	3.43717	0.822553	3.43717	0.822553	6.6399e-14	0.31865	889099	0.369659	0.377418	0.538988
AK2	1	32507986	33580996	4134.05	0.946725	7.87008	0.274361	7.87008	0.274361	7.48895e-14	0.236221	1.98614e+06	0.144039	0.11604	0.73337
AK3	9	4209556	5242043	90100.4	0.0138398	22.829	0.881395	22.829	0.881395	1.54875e-13	0.702574	1.76152e+06	0.522823	NA	NA
AK4	1	64647549	65732145	37845.7	0.0175338	10.6481	0.47938	10.6481	0.47938	1.16164e-13	0.163937	1.276e+06	0.495922	0.0625194	0.802557
AK4P3	12	31115023	32152095	34451.4	0.177236	19.2203	0.776836	19.2203	0.776836	1.01535e-13	0.848436	1.80248e+06	0.143547	NA	NA
AK5	1	76782019	78059966	15123.6	0.225909	21.1234	0.149506	21.1234	0.149506	1.11401e-13	0.0726699	1.84742e+06	0.7423	1.66741	0.196606
AK6	5	68850984	69870013	12206	0.297057	7.94669	0.269823	7.94669	0.269823	3.2098e-14	0.404393	1.84599e+06	0.00416963	0.0702263	0.791008
AK7	14	95892128	96989427	29424.6	0.294178	28.2987	0.80232	28.2987	0.80232	4.60088e-13	0.00633778	1.19653e+06	0.425179	NA	NA
AK8	9	132225578	133378777	46835.4	0.207573	17.3624	0.552251	17.3624	0.552251	2.0645e-13	0.347337	880011	0.231798	NA	NA
AK9	6	108992855	110191217	32829.1	0.0770229	5.80014	0.849398	5.80014	0.849398	9.71001e-14	0.0942874	1.13019e+06	0.382994	0.660903	0.416241
AKAIN1	18	4642911	5697503	40568.4	0.126515	12.4483	0.839467	12.4483	0.839467	1.23994e-13	0.373	1.96529e+06	0.228584	NA	NA
AKAP1	17	56585092	57621346	28499.2	0.768628	53.9561	0.153482	53.9561	0.153482	1.51117e-13	0.483414	1.57834e+06	0.375499	NA	NA
AKAP10	17	19404302	20478343	7773.11	0.250502	6.3108	0.115598	6.3108	0.115598	1.62038e-13	0.0105258	2.49303e+06	0.0106114	2.80005	0.0942606
AKAP11	13	41772152	42823261	9886.82	0.934046	12.0872	0.76587	12.0872	0.76587	3.26111e-14	0.792613	1.33339e+06	0.512214	2.26913	0.131974
AKAP12	6	150739967	151858559	19890.6	0.963934	30.8197	0.591259	30.8197	0.591259	9.22526e-14	0.913351	578471	0.503371	NA	NA
AKAP13	15	84880571	86249358	21435.7	0.641995	41.7098	0.176863	41.7098	0.176863	8.7134e-14	0.63044	1.64788e+06	0.205223	NA	NA
AKAP3	12	4115508	5149051	58343.2	0.328646	32.0696	0.801563	32.0696	0.801563	3.01113e-13	0.42891	1.82348e+06	0.468305	NA	NA
AKAP5	14	63965499	64974503	6877.22	0.433698	10.603	0.517292	10.603	0.517292	1.46047e-14	0.916444	1.17261e+06	0.466704	0.00403939	0.949324
AKAP6	14	31829298	33337684	57422.4	0.399701	75.324	0.0157933	75.324	0.0157933	7.15128e-13	0.00153636	2.56315e+06	0.199657	NA	NA
AKAP7	6	130635467	131783535	81611.5	0.0328592	15.6614	0.449245	15.6614	0.449245	2.29193e-13	0.0368096	1.08712e+06	0.15431	6.5302	0.0106057
AKAP8	19	14853385	15879815	16874.8	0.901716	26.3255	0.295705	26.3255	0.295705	8.3512e-14	0.901369	1.69484e+06	0.130024	NA	NA
AKAP8L	19	14880050	15919141	16141	0.905728	25.824	0.269379	25.824	0.269379	7.54858e-14	0.877964	1.70871e+06	0.139245	NA	NA
AKAP9	7	91440840	92610673	12810.2	0.67345	9.66	0.632371	9.66	0.632371	1.66615e-14	0.854381	1.00212e+06	0.596829	2.33363	0.126606
AKIP1	11	8411139	9420084	12024.7	0.667552	2.30789	0.717645	2.30789	0.717645	3.3771e-14	0.568436	1.79539e+06	0.0234949	2.11157	0.146189
AKIRIN1	1	38491276	39506059	132496	0.0279653	14.9933	0.306816	14.9933	0.306816	1.21128e-13	0.112626	1.91035e+06	0.019466	0.363317	0.54667
AKIRIN2	6	87174860	88202233	31326.2	0.129705	9.93676	0.638238	9.93676	0.638238	1.80003e-13	0.311092	1.12449e+06	0.681375	NA	NA
AKNA	9	113834156	114894405	36088.5	0.507722	31.5641	0.109492	31.5641	0.109492	2.95265e-13	0.0958858	1.28355e+06	0.0275705	NA	NA
AKNAD1	1	108315898	109463484	7321.94	0.772979	28.5134	0.0431533	28.5134	0.0431533	8.66762e-14	0.607446	948119	0.653252	0.00262702	0.959123
AKR1A1	1	45050543	46070049	815.833	0.909262	2.0234	0.51725	2.0234	0.51725	2.11003e-15	0.94398	1.28798e+06	0.330764	0.0692786	0.79239
AKR1B1	7	133942356	134959284	26857.3	0.751043	9.35493	0.876569	9.35493	0.876569	7.78355e-14	0.533821	593120	0.872946	NA	NA
AKR1B10	7	134027567	135041412	26667.1	0.730865	9.34274	0.874431	9.34274	0.874431	7.77596e-14	0.531032	606854	0.870421	NA	NA
AKR1B15	7	134049110	135079875	25804.9	0.744973	8.89845	0.887838	8.89845	0.887838	4.80345e-14	0.685092	678729	0.742424	NA	NA
AKR1C1	10	4463253	5483283	20065.5	0.933176	44.2857	0.446956	44.2857	0.446956	1.92682e-13	0.595967	1.80206e+06	0.313827	NA	NA
AKR1C2	10	4487775	5518031	22204.9	0.89563	45.6517	0.372386	45.6517	0.372386	1.98917e-13	0.638099	1.81719e+06	0.315088	NA	NA
AKR1C3	10	4535354	5607686	23825.6	0.95303	36.5929	0.783756	36.5929	0.783756	1.6737e-13	0.843755	1.90983e+06	0.289344	NA	NA
AKR1C4	10	4695462	5718949	25869.4	0.838537	30.7781	0.718701	30.7781	0.718701	1.21369e-13	0.920825	1.91754e+06	0.196763	NA	NA
AKR1C8	10	4653920	5685187	27054.4	0.902201	31.4654	0.80355	31.4654	0.80355	1.29303e-13	0.922786	1.93e+06	0.225524	NA	NA
AKR1D1	7	137502324	138618305	21647.9	0.123191	35.5969	0.136231	35.5969	0.136231	1.01607e-13	0.244811	606268	0.839004	0.736338	0.390836
AKR1E2	10	4286629	5348062	20472.5	0.952313	44.3621	0.441893	44.3621	0.441893	1.87233e-13	0.777812	1.72437e+06	0.768527	NA	NA
AKR7A2	1	18803965	19812144	17053.8	0.533607	11.5017	0.939723	11.5017	0.939723	8.01222e-14	0.40066	2.20517e+06	0.0377474	NA	NA
AKR7A3	1	18782573	19788770	17414.9	0.553643	11.0323	0.94716	11.0323	0.94716	8.01935e-14	0.41252	2.1898e+06	0.0439402	NA	NA
AKR7L	1	18765982	19774194	18269	0.521226	12.4521	0.915541	12.4521	0.915541	8.38229e-14	0.399181	2.16896e+06	0.0487986	NA	NA
AKT1	14	104269349	105295751	7681.65	0.641374	24.541	0.268944	24.541	0.268944	1.43947e-13	0.189382	994513	0.446587	0.118118	0.731085
AKT1S1	19	49369033	50378459	17335	0.0664551	11.2026	0.686062	11.2026	0.686062	2.60041e-13	0.112382	941128	0.68608	0.510915	0.474743
AKT2	19	39730317	40785536	7538.79	0.914973	13.5669	0.509848	13.5669	0.509848	6.83994e-14	0.60075	1.89082e+06	0.11938	0.0572233	0.81094
AKT3	1	242988233	244351079	27030.5	0.571604	32.6302	0.267065	32.6302	0.267065	1.46148e-13	0.550278	103648	0.00401979	NA	NA
AKTIP	16	52991040	54004411	37535.3	0.263904	11.0621	0.6183	11.0621	0.6183	1.24888e-13	0.0995691	1.34234e+06	0.864682	NA	NA
ALAD	9	112886312	113901290	15041.9	0.967776	20.2261	0.980037	20.2261	0.980037	5.29589e-14	0.995022	1.22138e+06	0.21786	NA	NA
ALAS1	3	51698086	52714327	10328.6	0.00964249	11.494	0.0706211	11.494	0.0706211	7.54734e-14	0.0695285	1.61054e+06	0.360728	0.0234293	0.878346
ALB	4	72897114	73921482	1715.61	0.976956	6.88248	0.530367	6.88248	0.530367	5.01046e-15	0.97495	1.45701e+06	0.465914	0.00392644	0.950036
ALCAM	3	104866909	106076900	23345.1	0.485924	27.164	0.132308	27.164	0.132308	1.1874e-13	0.567202	1.16272e+06	0.614015	NA	NA
ALDH16A1	19	48953225	49971050	43423.4	0.00230969	32.7921	0.0360544	32.7921	0.0360544	2.69376e-13	0.020773	866793	0.822113	1.09425	0.295532
ALDH18A1	10	95105941	96156711	39546	0.227248	15.1629	0.117899	15.1629	0.117899	3.42697e-14	0.778236	1.28163e+06	0.331518	NA	NA
ALDH1A1	9	72400671	73580442	5446.93	0.593462	5.20471	0.592981	5.20471	0.592981	1.63823e-14	0.912693	1.42746e+06	0.425558	0.515819	0.472631
ALDH1A2	15	57453424	58997866	24430.6	0.965313	24.5933	0.846007	24.5933	0.846007	1.10868e-13	0.849397	2.08126e+06	0.438356	NA	NA
ALDH1A3	15	100377714	101416626	27374.3	0.929382	20.5612	0.94889	20.5612	0.94889	1.89201e-13	0.433305	1.27801e+06	0.0839595	NA	NA
ALDH1B1	9	37892702	38898661	51575	0.225976	41.754	0.153196	41.754	0.153196	1.79052e-13	0.405935	2.00512e+06	0.038128	NA	NA
ALDH1L1	3	125603562	126697994	17729.3	0.651328	18.5293	0.585576	18.5293	0.585576	5.12426e-14	0.326349	714666	0.624134	NA	NA
ALDH1L2	12	104519784	105607643	29732	0.679412	10.5758	0.753974	10.5758	0.753974	1.32121e-13	0.426905	975759	0.732861	NA	NA
ALDH2	12	111266887	112317532	6827.32	0.149611	6.52905	0.33905	6.52905	0.33905	2.80536e-14	0.139802	1.24587e+06	0.133261	0.442942	0.505706
ALDH3A1	17	19237984	20248943	7823.89	0.259393	6.76493	0.196792	6.76493	0.196792	1.62689e-13	0.0105211	2.26214e+06	0.0432005	2.16922	0.140798
ALDH3A2	17	19148136	20185760	7823.89	0.259393	6.76493	0.196792	6.76493	0.196792	1.62689e-13	0.0105211	2.44626e+06	0.0116577	2.16988	0.140738
ALDH3B1	11	67508578	68529282	5977.6	0.813881	8.47733	0.199605	8.47733	0.199605	5.44298e-14	0.123335	1.20074e+06	0.800127	1.32963	0.248871
ALDH3B2	11	67162155	68181224	5546.52	0.447035	8.28374	0.171111	8.28374	0.171111	5.37523e-14	0.0699753	1.26496e+06	0.586222	0.0662472	0.796881
ALDH4A1	1	18371430	19402724	28349.3	0.205435	23.3153	0.890162	23.3153	0.890162	1.51201e-13	0.518048	2.00679e+06	0.0581639	NA	NA
ALDH5A1	6	23994867	25037207	26444	0.640909	10.8832	0.955828	10.8832	0.955828	1.20682e-13	0.48246	2.49188e+06	0.0453214	NA	NA
ALDH6A1	14	73556847	74584492	8774.48	0.901108	8.78457	0.902586	8.78457	0.902586	3.69635e-14	0.748688	1.53048e+06	0.593268	0.135556	0.71274
ALDH7A1	5	126031200	127095362	13554.1	0.263083	28.5986	0.206644	28.5986	0.206644	2.21742e-13	0.0129669	723497	0.782545	NA	NA
ALDH8A1	6	134417393	135450115	12815.6	0.809841	12.7772	0.578875	12.7772	0.578875	3.06531e-14	0.751189	719778	0.312356	10.2889	0.00133835
ALDH9A1	1	165162216	166198562	31328	0.346645	20.66	0.841257	20.66	0.841257	1.11942e-13	0.709705	337810	0.982218	NA	NA
ALDOA	16	29564164	30570457	2552.28	0.886906	0.31451	0.998895	0.31451	0.998895	6.79313e-15	0.981465	2.3178e+06	0.0505959	0.85202	0.355981
ALDOB	9	100920560	101949664	21340.7	0.414947	15.2937	0.90416	15.2937	0.90416	6.28858e-14	0.690232	1.17911e+06	0.373107	NA	NA
ALDOC	17	28073115	29076948	4265.43	0.817614	5.89757	0.635555	5.89757	0.635555	1.54695e-14	0.842736	1.19809e+06	0.716331	1.29393	0.255325
ALG1	16	4533702	5587379	28380.1	0.700425	11.8017	0.578747	11.8017	0.578747	8.8049e-14	0.945441	1.86483e+06	0.330011	NA	NA
ALG10	12	33522468	34529694	2722.6	0.24718	4.01902	0.194447	4.01902	0.194447	5.86077e-15	0.277179	2.14985e+06	0.0550202	3.45039	0.0632368
ALG10B	12	37816762	38829721	7572.23	0.0824647	15.1993	0.0466191	15.1993	0.0466191	6.17929e-15	0.00221264	2.03885e+06	0.0257697	1.9644	0.161043
ALG11	13	51512391	52579232	4285.98	0.675038	2.94946	0.430702	2.94946	0.430702	9.73903e-15	0.333927	1.68296e+06	0.437936	0.0192548	0.889638
ALG12	22	49400229	50418438	14168.1	0.843682	14.4704	0.787207	14.4704	0.787207	8.33121e-14	0.376388	948450	0.709764	NA	NA
ALG14	1	94474405	95572951	34688.2	0.831172	27.2387	0.465856	27.2387	0.465856	1.06079e-13	0.487137	1.43702e+06	0.234198	NA	NA
ALG1L2	3	129581831	130613227	11807.3	0.0291861	4.12353	0.237197	4.12353	0.237197	7.34187e-14	0.0722626	1.04844e+06	0.110998	1.61263	0.204123
ALG2	9	98716425	99721942	21349.7	0.221681	15.9492	0.385832	15.9492	0.385832	5.20374e-14	0.765418	1.21416e+06	0.335999	0.0152511	0.901715
ALG3	3	183742301	184749548	61897.1	0.0907348	47.6161	0.125558	47.6161	0.125558	2.96544e-13	0.0571	287539	0.138584	NA	NA
ALG5	13	36449738	37500763	19300.7	0.846345	32.177	0.350007	32.177	0.350007	1.30425e-13	0.396977	1.31536e+06	0.929945	NA	NA
ALG6	1	62867575	63938553	34230.9	0.308918	21.6202	0.426294	21.6202	0.426294	1.25917e-13	0.39721	1.47188e+06	0.0676638	NA	NA
ALG8	11	77595244	78639660	4384.74	0.484932	1.59553	0.83651	1.59553	0.83651	1.67055e-14	0.663063	1.32271e+06	0.944799	2.86511	0.0905191
ALG9	11	111282195	112371581	4590.15	0.752581	3.70356	0.30437	3.70356	0.30437	6.22571e-14	0.386525	1.27717e+06	0.149269	0.583574	0.444915
ALK	2	28692774	30421586	72833.9	0.103209	50.2829	0.0471944	50.2829	0.0471944	3.05839e-13	0.00811109	3.38107e+06	0.119588	NA	NA
ALKAL1	8	52034037	53065430	9779.97	0.83736	19.2779	0.027422	19.2779	0.027422	7.93025e-14	0.404784	1.42844e+06	0.807848	0.0303193	0.861768
ALKAL2	2	1	788851	17389.1	0.414635	14.2842	0.794709	14.2842	0.794709	5.05884e-14	0.661417	874026	0.392534	0.369665	0.543187
ALKBH1	14	77172404	78208023	30306.2	0.125354	28.2627	0.311409	28.2627	0.311409	7.73462e-14	0.380621	1.48425e+06	0.809121	NA	NA
ALKBH2	12	108588188	109593631	16738.3	0.608459	13.5093	0.42161	13.5093	0.42161	7.23535e-14	0.42993	813263	0.693503	2.49259	0.114383
ALKBH3	11	43380811	44420274	40291.4	0.380661	14.4901	0.893666	14.4901	0.893666	9.70087e-14	0.721239	1.4367e+06	0.515785	NA	NA
ALKBH4	7	101956238	102964863	1675.23	0.955418	6.06198	0.60757	6.06198	0.60757	1.33247e-14	0.986263	939426	0.342155	0.146316	0.702082
ALKBH5	17	17683078	18709954	6775.23	0.396639	4.58639	0.248546	4.58639	0.248546	2.10695e-14	0.240529	1.59329e+06	0.200174	0.878044	0.348738
ALKBH6	19	35509120	36514239	5318.57	0.887068	8.22828	0.629462	8.22828	0.629462	7.45685e-14	0.361321	1.75149e+06	0.330521	0.0321555	0.857687
ALKBH7	19	5872794	6875250	18442.5	0.240384	27.8109	0.184139	27.8109	0.184139	2.12742e-13	0.204105	NA	NA	1.63654	0.200801
ALKBH8	11	107002727	108065742	8306.1	0.993088	6.53771	0.963885	6.53771	0.963885	1.99061e-14	0.949831	1.27288e+06	0.327607	NA	NA
ALLC	2	3158200	4202671	45361.4	0.226227	31.3717	0.146807	31.3717	0.146807	2.86984e-13	0.0854351	1.78216e+06	0.133773	NA	NA
ALMS1	2	72885758	74125166	8997.94	0.327465	6.07919	0.50602	6.07919	0.50602	7.84733e-14	0.290376	1.74901e+06	0.445012	0.249328	0.617548
ALOX12	17	6496049	7510754	28006.4	0.707186	28.9326	0.347334	28.9326	0.347334	1.37204e-13	0.735533	NA	NA	NA	NA
ALOX12B	17	7572636	8587716	16062.8	0.505311	8.74497	0.936426	8.74497	0.936426	1.33034e-13	0.264931	1.76137e+06	0.32676	NA	NA
ALOX15	17	4130919	5142294	51596.9	0.148948	43.5979	0.134044	43.5979	0.134044	7.77975e-14	0.763578	1.7651e+06	0.550232	0.268834	0.604116
ALOX15B	17	7539034	8549134	16470.9	0.607777	9.48701	0.929586	9.48701	0.929586	1.37822e-13	0.36942	1.77081e+06	0.312036	NA	NA
ALOX5	10	44874176	45946119	20214.7	0.0199787	4.84659	0.415099	4.84659	0.415099	2.50438e-14	0.63912	1.40859e+06	0.507792	1.10343	0.293515
ALOX5AP	13	30213478	31264426	38165.6	0.528015	35.5542	0.484191	35.5542	0.484191	2.87173e-13	0.0647111	1.95425e+06	0.127139	NA	NA
ALOXE3	17	7595900	8619047	16062.8	0.505311	8.74497	0.936426	8.74497	0.936426	1.33034e-13	0.264931	1.85756e+06	0.157477	NA	NA
ALPG	2	231906844	232910714	17242.7	0.345154	14.421	0.671846	14.421	0.671846	6.97301e-14	0.457729	275671	0.471855	1.64684	0.19939
ALPI	2	231956125	232960753	30269	0.0515457	20.5893	0.319251	20.5893	0.319251	8.04975e-14	0.374421	251578	0.614796	0.873176	0.350077
ALPK1	4	111785509	112942621	31629.3	0.101656	14.0944	0.489921	14.0944	0.489921	3.91326e-14	0.903437	1.55237e+06	0.0125227	3.27418	0.0703785
ALPK2	18	57981247	59129091	32836.6	0.872512	28.1318	0.37113	28.1318	0.37113	1.11127e-13	0.746735	1.5148e+06	0.444832	NA	NA
ALPK3	15	84317356	85373479	5573.53	0.969746	5.10085	0.858618	5.10085	0.858618	2.25023e-14	0.915742	1.24408e+06	0.337996	1.78904	0.181043
ALPL	1	21009397	22078410	6165.57	0.991036	10.9245	0.887356	10.9245	0.887356	4.51327e-14	0.946815	1.857e+06	0.24205	0.261148	0.609332
ALPP	2	231878724	232882889	8820.52	0.857472	14.2027	0.681292	14.2027	0.681292	6.6133e-14	0.494221	273286	0.451875	1.67196	0.195996
ALS2	2	201200267	202282112	25328.3	0.553021	21.0665	0.18162	21.0665	0.18162	1.48824e-13	0.445437	211692	0.141212	NA	NA
ALS2CL	3	46168995	47193704	4950.2	0.831537	6.66047	0.809893	6.66047	0.809893	2.88686e-14	0.770344	1.23549e+06	0.696622	0.277529	0.598326
ALX1	12	84780220	85801784	13283	0.586582	69.9445	0.00158028	69.9445	0.00158028	5.62911e-14	0.116621	1.29968e+06	0.0769109	1.96427	0.161058
ALX3	1	109559870	110570672	33412.5	0.582716	16.7942	0.925917	16.7942	0.925917	2.1783e-13	0.219687	966311	0.525991	NA	NA
ALX4	11	43760440	44810139	62388	0.17038	28.0156	0.516817	28.0156	0.516817	1.50871e-13	0.494845	1.45883e+06	0.485128	NA	NA
ALYREF	17	81387835	82391586	17955.8	0.0383304	13.4271	0.207482	13.4271	0.207482	7.74776e-14	0.314425	1.20612e+06	0.548889	0.102968	0.748297
AMACR	5	33486165	34508104	30628.5	0.285626	18.3592	0.478717	18.3592	0.478717	1.02912e-13	0.323202	2.36881e+06	0.00595462	3.53258	0.0601742
AMBN	4	70092256	71107288	6265.57	0.399393	6.47452	0.469185	6.47452	0.469185	2.97892e-14	0.54888	1.19631e+06	0.702274	0.00751104	0.930937
AMBP	9	113560127	114578328	31852.7	0.581508	34.189	0.276243	34.189	0.276243	2.63245e-13	0.115095	1.01784e+06	0.120159	NA	NA
AMBRA1	11	45896414	47094125	6574.57	0.559889	1.92695	0.849638	1.92695	0.849638	1.53624e-15	0.958591	1.48205e+06	0.536784	0.0891453	0.765267
AMD1	6	110374770	111398879	7558.37	0.951207	12.505	0.583911	12.505	0.583911	4.09559e-14	0.209555	818250	0.732938	0.0807663	0.776261
AMDHD1	12	95443331	96468720	30305.4	0.378638	26.4933	0.694471	26.4933	0.694471	1.42769e-13	0.909586	1.12958e+06	0.459497	NA	NA
AMDHD2	16	2020357	3031422	12486.7	0.705178	8.80746	0.708884	8.80746	0.708884	5.53678e-14	0.731504	1.35098e+06	0.603447	0.0026969	0.958583
AMER2	13	24661679	25672288	124527	0.00574388	40.1077	0.0216552	40.1077	0.0216552	1.68846e-13	0.0631889	1.8004e+06	0.294042	NA	NA
AMER3	2	130255540	131268134	3412.19	0.400365	6.98702	0.0938034	6.98702	0.0938034	9.0997e-15	0.49001	971374	0.39117	0.00325146	0.954528
AMFR	16	55861452	56925545	42341.4	0.0980052	25.1246	0.0547175	25.1246	0.0547175	3.22042e-13	0.0403156	1.50611e+06	0.535437	NA	NA
AMH	19	1749309	2752073	37422.5	0.070711	32.3559	0.135445	32.3559	0.135445	6.76213e-14	0.81584	1.38895e+06	0.560022	1.24614	0.264291
AMHR2	12	52923855	53931672	20725.5	0.33814	45.0465	0.0121838	45.0465	0.0121838	1.31929e-13	0.131851	1.32332e+06	0.908609	1.9396	0.163712
AMIGO1	1	109004178	110009738	7066.38	0.928909	18.9029	0.646354	18.9029	0.646354	4.00177e-14	0.93622	978453	0.39354	1.59308	0.206886
AMIGO2	12	46575707	47579959	7652.74	0.969614	8.39987	0.981467	8.39987	0.981467	7.08362e-14	0.741972	1.13583e+06	0.7584	NA	NA
AMIGO3	3	49216829	50219684	177.569	0.908623	0.575757	0.855842	0.575757	0.855842	1.95599e-15	0.817568	903013	0.741352	0.70769	0.400212
AMMECR1L	2	127361630	128385967	10732.8	0.507277	5.57118	0.601959	5.57118	0.601959	3.67365e-14	0.665885	904550	0.342676	0.0699656	0.791387
AMN	14	102422663	103433596	11649	0.343837	16.0894	0.41023	16.0894	0.41023	5.67084e-14	0.339388	804745	0.964607	0.414317	0.519787
AMN1	12	31171142	32229121	36028.6	0.178186	19.5353	0.793404	19.5353	0.793404	1.02717e-13	0.868177	1.80142e+06	0.137868	NA	NA
AMOTL1	11	94206431	95376748	17004.2	0.618059	11.7091	0.911555	11.7091	0.911555	1.0349e-13	0.678671	1.41147e+06	0.464293	1.94607	0.163011
AMOTL2	3	133855347	134875479	25049.3	0.435544	20.2827	0.364319	20.2827	0.364319	7.92967e-14	0.7554	553470	0.966548	0.611424	0.434252
AMPD1	1	114173090	115195618	19061.7	0.459004	21.3439	0.0981318	21.3439	0.0981318	1.49087e-13	0.198257	1.15735e+06	0.0813581	0.860235	0.353673
AMPD2	1	109116104	110132051	7670.74	0.960347	9.75704	0.991243	9.75704	0.991243	3.35153e-14	0.995826	1.01269e+06	0.392645	NA	NA
AMPD3	11	9808313	11007579	69952.8	0.20912	16.3369	0.34373	16.3369	0.34373	2.39914e-13	0.00237353	2.00721e+06	0.209169	NA	NA
AMPH	7	37883704	39131420	39104.9	0.434401	40.7838	0.0477679	40.7838	0.0477679	1.99305e-13	0.34036	2.40658e+06	0.0162809	NA	NA
AMT	3	48916778	49922685	1729.46	0.63356	0.764779	0.841858	0.764779	0.841858	5.50185e-15	0.847701	888686	0.806126	0.207069	0.649075
AMTN	4	70018569	71032743	6384.51	0.515865	6.47653	0.535069	6.47653	0.535069	3.04467e-14	0.595297	1.11941e+06	0.878695	0.00488395	0.944285
AMY1A	1	103155760	104164554	2073.24	0.597436	3.90174	0.427636	3.90174	0.427636	1.20791e-14	0.542642	936208	0.731848	2.02527	0.154702
AMY1B	1	103187415	104196454	2073.24	0.597436	3.90174	0.427636	3.90174	0.427636	1.20791e-14	0.542642	939132	0.644689	1.88905	0.169309
AMY1C	1	103245323	104258726	2165.57	0.822164	3.9139	0.476376	3.9139	0.476376	1.20896e-14	0.555952	936441	0.628746	1.8061	0.178977
AMY2A	1	103117427	104125780	5961.74	0.29606	4.91687	0.338048	4.91687	0.338048	3.0454e-14	0.200211	892605	0.791982	2.38464	0.122533
AMY2B	1	103053815	104079534	5961.74	0.29606	4.91687	0.338048	4.91687	0.338048	3.0454e-14	0.200211	917269	0.784329	2.00738	0.156536
AMZ1	7	2179522	3275500	31761.6	0.305035	28.7739	0.321678	28.7739	0.321678	2.55873e-13	0.0403424	1.49119e+06	0.676937	NA	NA
AMZ2	17	67705481	68757712	45007.6	0.0756818	17.4027	0.597397	17.4027	0.597397	1.48077e-13	0.094094	1.25545e+06	0.678835	NA	NA
ANAPC1	2	111111639	112384690	12138.7	0.50023	38.7047	0.0586615	38.7047	0.0586615	6.59668e-14	0.310976	1.41565e+06	0.204973	0.544387	0.46062
ANAPC10	4	144331908	145598541	23702.3	0.595134	3.77216	0.459571	3.77216	0.459571	4.51358e-14	0.537768	491217	0.553365	0.446522	0.503991
ANAPC11	17	81390790	82400991	17955.8	0.0383304	13.4271	0.207482	13.4271	0.207482	7.74776e-14	0.314425	1.21481e+06	0.556066	0.102968	0.748297
ANAPC13	3	133977706	134986716	32763.6	0.321918	18.3883	0.393444	18.3883	0.393444	7.25216e-14	0.61052	591782	0.880254	0.762725	0.382477
ANAPC15	11	71606378	72612780	32725	0.0673478	19.8914	0.14645	19.8914	0.14645	1.38203e-13	0.038587	1.54764e+06	0.361362	2.16119	0.141535
ANAPC16	10	71716000	72735860	9574.4	0.666603	11.6474	0.256338	11.6474	0.256338	3.55602e-14	0.678345	1.49602e+06	0.356438	0.225748	0.634695
ANAPC2	9	136674784	137688560	5219.95	0.655881	6.11222	0.5513	6.11222	0.5513	4.77872e-14	0.588769	555090	0.741019	3.56352	0.0590623
ANAPC4	4	24877263	25918498	36757.1	0.418844	34.5918	0.276292	34.5918	0.276292	2.01582e-13	0.461986	1.6758e+06	0.612802	NA	NA
ANAPC5	12	120808245	121899896	7411.28	0.94885	8.2683	0.9167	8.2683	0.9167	4.60606e-14	0.875959	985192	0.846309	0.591342	0.441901
ANAPC7	12	109872900	110903730	6009.7	0.463535	1.19399	0.322315	1.19399	0.322315	1.59077e-14	0.319145	861700	0.715718	0.16831	0.681618
ANG	14	20184177	21198971	59403.7	0.18821	68.2236	0.337356	68.2236	0.337356	4.94273e-13	0.0384226	1.80135e+06	0.293444	NA	NA
ANGEL1	14	76286009	77326246	29676.6	0.372996	34.3604	0.346395	34.3604	0.346395	1.27898e-13	0.902711	1.66928e+06	0.456421	NA	NA
ANGEL2	1	212492182	213515867	58099.6	0.119163	11.4028	0.702328	11.4028	0.702328	1.2197e-13	0.577557	176331	0.282173	2.74471	0.0975776
ANGPT1	8	106749482	107998055	24552.5	0.489962	38.4113	0.0982384	38.4113	0.0982384	2.50505e-13	0.00888063	1.30497e+06	0.647808	NA	NA
ANGPT2	8	5999632	7063409	103711	0.278241	38.2681	0.492866	38.2681	0.492866	2.34597e-13	0.691739	NA	NA	NA	NA
ANGPT4	20	369900	1416334	136502	0.0635115	83.9197	0.106071	83.9197	0.106071	4.72679e-13	0.0412889	1.25174e+06	0.529619	NA	NA
ANGPTL1	1	178349535	179371077	10044.2	0.798336	7.25576	0.413513	7.25576	0.413513	5.28362e-14	0.613741	430958	0.231984	0.442039	0.50614
ANGPTL2	9	126587348	127622635	27494.5	0.578741	19.0483	0.39863	19.0483	0.39863	1.23075e-13	0.195857	811435	0.829099	0.93558	0.333417
ANGPTL3	1	62097520	63106313	51562.4	0.126532	18.9715	0.594978	18.9715	0.594978	2.67613e-13	0.0680733	1.18993e+06	0.24091	NA	NA
ANGPTL4	19	7863289	8874370	20050.5	0.0872357	21.5657	0.393121	21.5657	0.393121	1.22553e-13	0.114113	1.8416e+06	0.132578	NA	NA
ANGPTL5	11	101390674	102416522	8274.8	0.68107	17.4055	0.392708	17.4055	0.392708	4.14262e-13	0.00844304	1.03352e+06	0.441572	1.38565	0.239142
ANGPTL6	19	9592338	10602678	18545.7	0.0749729	17.7184	0.336864	17.7184	0.336864	1.08531e-13	0.3418	1.66738e+06	0.317569	3.09666	0.0784531
ANGPTL7	1	10689355	11695981	25374.1	0.286726	31.7768	0.100184	31.7768	0.100184	2.22085e-13	0.0258887	1.71242e+06	0.352333	0.00429748	0.947732
ANGPTL8	19	10737502	11741943	18990.7	0.0336857	29.4946	0.250681	29.4946	0.250681	1.33533e-13	0.109683	1.67105e+06	0.4288	0.362544	0.547097
ANHX	12	132718312	133735877	8968.23	0.325993	2.36689	0.877355	2.36689	0.877355	1.38262e-14	0.622442	714665	0.546929	0.718775	0.396546
ANK1	8	41153220	42396741	20913.6	0.303612	24.0093	0.225164	24.0093	0.225164	7.92112e-14	0.34614	1.73325e+06	0.615265	NA	NA
ANK2	4	112318032	113884221	49366.2	0.213286	34.8183	0.218503	34.8183	0.218503	1.5842e-13	0.694178	2.14e+06	0.013238	NA	NA
ANK3	10	59526298	61233490	23342.3	0.781103	19.8492	0.734252	19.8492	0.734252	8.90257e-14	0.699693	2.76907e+06	0.169989	NA	NA
ANKAR	2	189174290	190261193	6163.19	0.460789	6.84073	0.645575	6.84073	0.645575	3.28128e-14	0.751223	285810	0.641137	1.69481	0.192968
ANKDD1A	15	64411902	65458691	12494.4	0.114112	5.19852	0.415614	5.19852	0.415614	6.31046e-14	0.602016	1.11203e+06	0.706757	0.4797	0.488558
ANKDD1B	5	75111182	76181773	15815.1	0.235232	9.39921	0.108782	9.39921	0.108782	5.19669e-14	0.381851	1.62801e+06	0.11689	0.299056	0.584475
ANKEF1	20	9486126	10558303	34599.9	0.731006	33.7556	0.673745	33.7556	0.673745	2.29725e-13	0.342648	1.66977e+06	0.378959	NA	NA
ANKFN1	17	55382301	57017016	22631.2	0.660985	20.4753	0.880207	20.4753	0.880207	6.33896e-14	0.993788	2.66921e+06	0.0560012	NA	NA
ANKFY1	17	3663821	4763995	43043.6	0.187989	55.4589	0.141196	55.4589	0.141196	1.055e-13	0.862784	1.87689e+06	0.676953	NA	NA
ANKH	5	14204800	15371778	21006.8	0.284859	34.0973	0.0576441	34.0973	0.0576441	1.54537e-13	0.144843	2.1376e+06	0.0902911	0.703387	0.401647
ANKHD1	5	139901814	141039856	2778.6	0.97987	1.99268	0.993528	1.99268	0.993528	1.06773e-14	0.954513	400158	0.762339	0.365892	0.545252
ANKHD1-EIF4EBP3	5	139901908	141049569	6413.51	0.790939	2.08574	0.992255	2.08574	0.992255	2.94397e-14	0.689054	415849	0.715466	0.471971	0.492081
ANKIB1	7	91745974	92901383	3663.6	0.832494	3.42147	0.872301	3.42147	0.872301	5.43039e-15	0.960391	915624	0.642921	0.305915	0.580198
ANKK1	11	112887779	113900416	27131.4	0.188414	15.7205	0.47969	15.7205	0.47969	9.89761e-14	0.137466	1.22136e+06	0.217778	1.10443	0.293295
ANKLE1	19	16781645	17787646	20675	0.636099	36.3651	0.145713	36.3651	0.145713	3.24127e-13	0.196369	1.92309e+06	0.0135358	NA	NA
ANKLE2	12	132225503	133261832	12761.8	0.47954	6.12053	0.915681	6.12053	0.915681	3.61006e-14	0.647271	802198	0.272747	0.469804	0.493077
ANKMY1	2	239979422	241069209	32583.4	0.162353	40.7858	0.0314868	40.7858	0.0314868	2.00957e-13	0.0510317	76439.5	0.947495	NA	NA
ANKMY2	7	16099779	17145817	37152.9	0.29956	43.2496	0.376887	43.2496	0.376887	8.9019e-14	0.811303	1.77567e+06	0.180618	NA	NA
ANKRA2	5	73052190	74065667	28495.3	0.216754	10.6702	0.636147	10.6702	0.636147	1.86175e-13	0.0551893	1.47108e+06	0.461589	NA	NA
ANKRD1	10	90412096	91421087	16858.7	0.489061	27.0282	0.181326	27.0282	0.181326	7.19298e-14	0.844281	1.14692e+06	0.558772	0.10287	0.748412
ANKRD10	13	110378540	111415069	90963.6	0.00191037	111.535	0.00141424	111.535	0.00141424	2.87186e-13	0.163226	825183	0.758512	NA	NA
ANKRD11	16	88767630	89990561	10638.3	0.526043	15.8192	0.450583	15.8192	0.450583	1.13086e-13	0.420228	1.38284e+06	0.482575	4.45782	0.0347416
ANKRD12	18	8636228	9785985	48656.7	0.603184	50.6721	0.523454	50.6721	0.523454	3.71122e-13	0.112196	1.68266e+06	0.146707	NA	NA
ANKRD13A	12	109499186	110539763	30981.2	0.155553	13.5859	0.287191	13.5859	0.287191	4.68633e-14	0.33	974216	0.500646	0.552141	0.457444
ANKRD13B	17	29089769	30114761	1651.72	0.812117	1.57608	0.833948	1.57608	0.833948	3.55821e-14	0.628932	2.09201e+06	0.22563	6.81476	0.00904066
ANKRD13C	1	69758999	70854734	16142.4	0.450769	17.4145	0.274241	17.4145	0.274241	3.76323e-14	0.854003	1.22943e+06	0.824908	2.13232	0.144222
ANKRD13D	11	66789300	67802485	4637.06	0.429362	2.12845	0.355243	2.12845	0.355243	1.8444e-14	0.260886	1.54913e+06	0.221028	0.0452962	0.83146
ANKRD16	10	5361616	6389906	94262.5	0.00829761	53.9335	0.108386	53.9335	0.108386	5.64964e-13	0.00821151	2.08895e+06	0.340998	NA	NA
ANKRD17	4	72573376	73758798	1732.97	0.998603	8.17754	0.720024	8.17754	0.720024	1.07624e-14	0.973752	1.51077e+06	0.362782	0.00383399	0.950627
ANKRD18A	9	38040567	39120596	50840.2	0.208417	41.3041	0.144379	41.3041	0.144379	1.78884e-13	0.348912	2.27591e+06	0.00841048	NA	NA
ANKRD18B	9	33024251	34108848	18105.5	0.103437	8.52257	0.895879	8.52257	0.895879	1.79094e-14	0.977323	2.3335e+06	0.0224433	0.0863175	0.768913
ANKRD2	10	97072499	98083884	43980.4	0.164062	20.4346	0.195107	20.4346	0.195107	4.3883e-14	0.735082	1.21922e+06	0.157236	1.19022	0.275286
ANKRD20A1	9	67332765	68420552	176.4	0.421794	0.0264183	0.421794	0.0264183	0.421794	6.3448e-16	0.421794	1.23958e+06	0.821817	0.034332	0.853002
ANKRD22	10	88319896	89351844	18118.8	0.790743	12.835	0.756542	12.835	0.756542	9.85256e-14	0.836642	1.37598e+06	0.269199	NA	NA
ANKRD23	2	96324526	97357934	948.677	0.62142	2.78183	0.454879	2.78183	0.454879	9.07504e-15	0.342182	1.13653e+06	0.531063	0.488684	0.484515
ANKRD24	19	3682689	4724814	18142.8	0.0677442	22.0282	0.0314628	22.0282	0.0314628	6.30468e-14	0.200715	1.78599e+06	0.671171	0.38492	0.534982
ANKRD26	10	26473793	27600494	21946.8	0.568065	16.0284	0.881753	16.0284	0.881753	1.25873e-13	0.370463	1.7748e+06	0.542745	NA	NA
ANKRD27	19	32097006	33176597	37755.5	0.0801691	20.6493	0.439064	20.6493	0.439064	2.10093e-13	0.0847292	1.96342e+06	0.194067	0.321426	0.570751
ANKRD28	3	15167236	16359771	69079.3	0.118391	27.0367	0.042448	27.0367	0.042448	1.36987e-13	0.0563237	1.84287e+06	0.23523	NA	NA
ANKRD29	18	23098926	24162911	9977.23	0.584448	7.26829	0.386432	7.26829	0.386432	2.98599e-14	0.258143	2.01382e+06	0.509811	1.43924	0.230262
ANKRD30A	10	36625598	37732567	6786.55	0.795783	4.36481	0.345412	4.36481	0.345412	7.97041e-14	0.27398	1.37503e+06	0.929422	0.333147	0.563812
ANKRD30B	18	14228272	15354667	24937.4	0.160968	9.86299	0.229606	9.86299	0.229606	5.33309e-14	0.571292	2.02186e+06	0.113913	0.411925	0.520994
ANKRD30BL	2	131647591	132757969	36825.4	0.344943	12.5694	0.631785	12.5694	0.631785	8.62028e-14	0.663591	945346	0.0794971	NA	NA
ANKRD31	5	74568275	75736911	21535	0.0110014	18.4728	0.022608	18.4728	0.022608	8.44157e-14	0.261152	1.38664e+06	0.157664	0.798132	0.371652
ANKRD33	12	51388009	52391727	69409.4	0.308009	24.3678	0.613503	24.3678	0.613503	1.41694e-13	0.730276	1.52693e+06	0.467672	NA	NA
ANKRD33B	5	10064070	11157816	68481	0.0298827	24.7162	0.880549	24.7162	0.880549	1.65541e-13	0.161761	1.91756e+06	0.109325	NA	NA
ANKRD34A	1	145459441	146464575	3317.23	0.410151	5.43581	0.190419	5.43581	0.190419	3.52175e-14	0.173547	688529	0.0140457	4.92535	0.0264655
ANKRD34B	5	80056755	81070280	9575.88	0.78394	13.3046	0.520453	13.3046	0.520453	8.80493e-14	0.60415	1.53962e+06	0.156853	NA	NA
ANKRD34C	15	78782722	79798239	40455.8	0.366375	31.7902	0.0447959	31.7902	0.0447959	1.39707e-13	0.40911	1.81425e+06	0.277064	NA	NA
ANKRD35	1	145366560	146385866	3317.23	0.410151	5.43581	0.190419	5.43581	0.190419	3.52175e-14	0.173547	697842	0.0103952	4.92535	0.0264655
ANKRD36	2	96613153	97764521	1164.95	0.656126	2.55885	0.361212	2.55885	0.361212	9.21058e-15	0.352609	1.44858e+06	0.429386	1.52395	0.217023
ANKRD36B	2	96992663	98089877	1391.34	0.817329	3.19854	0.468967	3.19854	0.468967	1.55102e-15	0.790865	1.35063e+06	0.17127	0.876758	0.349091
ANKRD36C	2	95336919	96491831	1533.6	0.783712	5.12202	0.236504	5.12202	0.236504	2.99216e-15	0.817258	1.2969e+06	0.44272	1.1703	0.279341
ANKRD37	4	184896021	185900628	29121.3	0.852779	41.9106	0.441364	41.9106	0.441364	3.08013e-13	0.20591	203558	0.323813	NA	NA
ANKRD39	2	96336611	97358016	942.07	0.590278	2.78074	0.452889	2.78074	0.452889	9.07493e-15	0.342131	1.13088e+06	0.480168	0.675561	0.411119
ANKRD40	17	50193198	51207914	28147.9	0.582158	20.0308	0.398074	20.0308	0.398074	7.52147e-14	0.647111	1.24227e+06	0.265806	NA	NA
ANKRD40CL	17	50261029	51267557	23085.3	0.411972	18.7872	0.323479	18.7872	0.323479	7.22728e-14	0.572884	1.27194e+06	0.185257	NA	NA
ANKRD42	11	82693712	83760694	5749.51	0.917716	2.97877	0.977317	2.97877	0.977317	4.07013e-14	0.505626	1.29506e+06	0.497327	0.345401	0.556728
ANKRD44	2	196467017	197811173	7872.8	0.380311	4.61116	0.474649	4.61116	0.474649	6.88586e-14	0.393891	60894.8	0.966241	0.119422	0.729662
ANKRD45	1	173108336	174169851	67274	0.0266843	11.6528	0.380317	11.6528	0.380317	2.80444e-14	0.81664	379192	0.815214	0.194699	0.659034
ANKRD46	8	100009752	101059784	24034.4	0.856141	17.3355	0.818986	17.3355	0.818986	1.49566e-13	0.574084	1.14448e+06	0.228223	NA	NA
ANKRD49	11	93993979	94999578	11827.7	0.676607	10.6306	0.317109	10.6306	0.317109	7.26709e-14	0.496353	1.23394e+06	0.378287	0.280188	0.596578
ANKRD50	4	124164048	125212732	10207.4	0.619287	5.78061	0.65413	5.78061	0.65413	3.33023e-14	0.662917	1.01681e+06	0.0744436	0.437474	0.508344
ANKRD52	12	55737807	56758384	4252.17	0.942559	2.84429	0.962029	2.84429	0.962029	8.2471e-15	0.984925	1.57059e+06	0.361023	1.2742	0.258981
ANKRD53	2	70478380	71485499	26387	0.433081	29.7634	0.234073	29.7634	0.234073	1.30017e-13	0.424981	1.31837e+06	0.81704	NA	NA
ANKRD54	22	37330855	38349327	18992.7	0.621508	15.2786	0.6057	15.2786	0.6057	7.40891e-14	0.841898	1.54756e+06	0.407843	0.422243	0.51582
ANKRD55	5	55599680	56733330	50871	0.0631588	32.1184	0.500794	32.1184	0.500794	1.35177e-13	0.669005	1.84514e+06	0.18627	NA	NA
ANKRD6	6	88933152	90133834	20359.4	0.343089	19.2152	0.338454	19.2152	0.338454	2.54825e-13	0.155536	1.39369e+06	0.261071	NA	NA
ANKRD60	20	57716126	58728653	62107.3	0.278717	28.5635	0.700049	28.5635	0.700049	1.65564e-13	0.4558	1.37855e+06	0.305356	NA	NA
ANKRD61	7	5531376	6536552	12985.3	0.498937	7.29058	0.473981	7.29058	0.473981	1.30373e-13	0.200621	NA	NA	0.147774	0.700672
ANKRD62	18	11593843	12629764	17694	0.516647	42.8384	0.0940268	42.8384	0.0940268	1.56692e-13	0.34667	1.67691e+06	0.182921	0.280186	0.596579
ANKRD63	15	39778372	40783064	31663.5	0.192497	33.1137	0.0125909	33.1137	0.0125909	1.38588e-13	0.12872	1.85465e+06	0.101004	1.11436	0.291135
ANKRD65	1	918420	1921769	8083.39	0.38554	2.56711	0.769837	2.56711	0.769837	2.81221e-15	0.861696	1.18739e+06	0.699229	1.0098	0.314951
ANKRD66	6	46246933	47259506	13639.4	0.698331	6.27326	0.822384	6.27326	0.822384	7.16678e-14	0.640689	1.22883e+06	0.713642	0.211754	0.645397
ANKRD7	7	117714669	118996171	12055.1	0.545576	14.0836	0.0549409	14.0836	0.0549409	1.03118e-13	0.186174	1.26991e+06	0.39634	0.0309908	0.860261
ANKRD9	14	102001767	103009799	7587.17	0.2207	7.35206	0.451293	7.35206	0.451293	4.50481e-14	0.174035	932689	0.416514	0.0874764	0.767411
ANKS1A	6	34389255	35591406	10016.3	0.341679	13.5708	0.00711271	13.5708	0.00711271	2.59223e-14	0.881507	2.18914e+06	0.0140111	0.633345	0.426131
ANKS1B	12	98226457	100484936	46028.7	0.335712	24.2677	0.62407	24.2677	0.62407	1.92077e-13	0.598418	2.63432e+06	0.223032	NA	NA
ANKS3	16	4196510	5234378	30905.5	0.458936	12.1642	0.223059	12.1642	0.223059	5.67121e-14	0.933415	1.78868e+06	0.546769	NA	NA
ANKS4B	16	20733699	21753850	16988.1	0.2739	6.1183	0.490859	6.1183	0.490859	3.62859e-14	0.552936	1.60852e+06	0.497116	1.0121	0.3144
ANKS6	9	98231329	99296965	35686.9	0.284526	41.6059	0.604067	41.6059	0.604067	1.32951e-13	0.368386	1.39126e+06	0.223724	NA	NA
ANKUB1	3	149261100	150468385	26344.8	0.236268	22.743	0.51545	22.743	0.51545	1.22748e-13	0.647244	416003	0.779798	NA	NA
ANKZF1	2	218729783	219736679	11066	0.872536	7.08435	0.683733	7.08435	0.683733	1.13971e-14	0.896483	192806	0.349302	6.30215	0.0120592
ANLN	7	35889821	36953791	31238.4	0.397274	43.3337	0.155255	43.3337	0.155255	1.12914e-13	0.284982	1.61792e+06	0.820422	NA	NA
ANO1	11	69485907	70689530	37895.7	0.207748	19.9496	0.842861	19.9496	0.842861	1.23648e-13	0.664671	1.44844e+06	0.556642	NA	NA
ANO10	3	42854859	44191594	30934.2	0.456372	15.1701	0.392375	15.1701	0.392375	1.05432e-13	0.50556	1.7601e+06	0.749292	0.194724	0.659013
ANO2	12	5031869	6446232	90986.1	0.271508	49.7404	0.631551	49.7404	0.631551	4.43607e-13	0.13997	2.6813e+06	0.507478	NA	NA
ANO3	11	25688842	27163289	61164.4	0.135741	31.587	0.111037	31.587	0.111037	1.46957e-13	0.283638	2.54281e+06	0.582386	NA	NA
ANO4	12	100217526	101628641	35560.4	0.25494	32.4537	0.300343	32.4537	0.300343	1.88575e-13	0.612316	1.74328e+06	0.0903586	NA	NA
ANO5	11	21282659	22783567	43722.2	0.227183	27.2323	0.509452	27.2323	0.509452	1.16584e-13	0.620413	2.60231e+06	0.318498	NA	NA
ANO6	12	44715987	45982280	30719.2	0.206569	21.8723	0.166902	21.8723	0.166902	9.05395e-14	0.221158	1.67747e+06	0.482606	0.164082	0.685425
ANO7	2	240688509	241725976	11288.1	0.859773	14.8141	0.400051	14.8141	0.400051	1.84621e-13	0.122765	70970.2	0.761804	5.15718	0.0231505
ANO8	19	16823223	17834855	22335	0.664649	39.0677	0.170832	39.0677	0.170832	3.55917e-13	0.15541	1.9181e+06	0.018598	NA	NA
ANO9	11	1	942011	10963.2	0.374556	10.6758	0.361371	10.6758	0.361371	8.78347e-14	0.137513	1.02979e+06	0.453595	0.724722	0.394599
ANP32A	15	68278535	69320897	20800.3	0.908916	6.46559	0.952717	6.46559	0.952717	7.29367e-14	0.809168	1.88689e+06	0.0185214	0.823616	0.364125
ANP32B	9	97483341	98515943	69811	0.115618	41.9023	0.538117	41.9023	0.538117	9.21277e-14	0.534645	1.22889e+06	0.193826	NA	NA
ANP32D	12	47972559	48973622	9273.78	0.454649	5.92557	0.519884	5.92557	0.519884	5.25505e-14	0.469625	1.36848e+06	0.366248	0.130013	0.718418
ANP32E	1	149718417	150736156	8159.69	0.271524	1.2671	0.869604	1.2671	0.869604	3.17179e-14	0.641681	398241	0.504889	0.538652	0.462991
ANPEP	15	89284895	90315401	45866.2	0.135797	19.0462	0.626855	19.0462	0.626855	1.02547e-13	0.563814	1.04432e+06	0.474682	NA	NA
ANTKMT	16	220581	1222590	17100.9	0.557511	11.383	0.497401	11.383	0.497401	2.52869e-13	0.0311209	1.24018e+06	0.448107	2.02033	0.155206
ANTXR1	2	68513176	69749327	31990.8	0.19047	29.1403	0.307253	29.1403	0.307253	1.75359e-13	0.0271038	2.14305e+06	0.00855071	2.29615	0.129696
ANTXR2	4	79401146	80625454	10168.5	0.606944	16.6239	0.619157	16.6239	0.619157	3.90894e-14	0.614135	1.97701e+06	0.103695	0.061311	0.804436
ANTXRL	10	45786345	46830207	27697.6	0.0406739	11.1612	0.227021	11.1612	0.227021	7.01345e-14	0.165855	1.33508e+06	0.22104	6.93978	0.00842985
ANXA1	9	72651865	73670393	5342.11	0.748457	3.44076	0.89754	3.44076	0.89754	1.95878e-14	0.936948	1.19595e+06	0.52296	0.301558	0.582907
ANXA10	4	167592537	168687736	49870.7	0.124261	15.9656	0.777246	15.9656	0.777246	1.3069e-13	0.496024	570771	0.444901	NA	NA
ANXA11	10	79650889	80705572	17749.1	0.325139	12.3673	0.480062	12.3673	0.480062	7.99619e-14	0.145171	1.72096e+06	0.145418	NA	NA
ANXA13	8	123180794	124237402	11755.8	0.923028	26.8627	0.20345	26.8627	0.20345	8.39082e-14	0.849348	702447	0.813527	NA	NA
ANXA2	15	59847134	60902883	39658.9	0.322871	28.047	0.192445	28.047	0.192445	2.31227e-13	0.282423	1.66598e+06	0.240672	NA	NA
ANXA2R	5	42539233	43543170	3227.47	0.574118	3.19149	0.61101	3.19149	0.61101	1.21795e-14	0.527302	1.28146e+06	0.772772	0.0117583	0.91365
ANXA3	4	78051747	79110451	9105.07	0.505429	5.48063	0.8061	5.48063	0.8061	8.23611e-15	0.974541	1.74674e+06	0.55426	0.0420542	0.837516
ANXA4	2	69144425	70327112	6889.42	0.301198	7.46761	0.550613	7.46761	0.550613	5.98518e-14	0.172221	1.74443e+06	0.0397185	1.22986	0.267434
ANXA5	4	121167946	122196995	28785.9	0.424934	12.6562	0.739168	12.6562	0.739168	5.79507e-14	0.842222	846630	0.826605	NA	NA
ANXA6	5	150600706	151657815	38813.7	0.795931	13.0001	0.964554	13.0001	0.964554	6.89711e-14	0.792851	607079	0.344125	NA	NA
ANXA7	10	72875101	73914076	1284.98	0.568591	5.79531	0.14838	5.79531	0.14838	1.75263e-14	0.327363	1.43759e+06	0.517222	0.196772	0.657338
ANXA8	10	46960162	47984158	21622.5	0.348443	11.7229	0.176247	11.7229	0.176247	2.3252e-14	0.624929	1.28364e+06	0.327662	1.80472	0.179143
ANXA8L1	10	45875627	46891784	27697.6	0.0406739	11.1612	0.227021	11.1612	0.227021	7.01345e-14	0.165855	1.24188e+06	0.370002	6.93978	0.00842985
ANXA9	1	150482249	151495634	9484.63	0.168614	2.99583	0.498595	2.99583	0.498595	2.62516e-14	0.472372	567427	0.379041	1.13169	0.287416
AOAH	7	36012941	37224549	30767.4	0.457631	44.3398	0.226794	44.3398	0.226794	1.146e-13	0.396486	1.56202e+06	0.965212	NA	NA
AOC1	7	150324627	151361504	31081.9	0.503887	22.6874	0.781481	22.6874	0.781481	2.48453e-13	0.142705	605873	0.364023	NA	NA
AOC2	17	42344580	43350707	6181.57	0.607081	3.41509	0.181748	3.41509	0.181748	8.36619e-15	0.633447	1.36231e+06	0.521429	0.513001	0.473842
AOC3	17	42351184	43358130	6181.57	0.607081	3.41509	0.181748	3.41509	0.181748	8.36619e-15	0.633447	1.36256e+06	0.512907	0.513001	0.473842
AOPEP	9	94226604	95651793	33121.6	0.16268	9.83129	0.720802	9.83129	0.720802	3.23154e-14	0.779715	1.73312e+06	0.461164	0.446409	0.504045
AOX1	2	200086014	201177064	17195.6	0.704838	6.91077	0.719936	6.91077	0.719936	9.15291e-14	0.164384	136515	0.858532	1.03971	0.307888
AP1AR	4	111731740	112773110	30985.6	0.0933216	13.1519	0.470465	13.1519	0.470465	3.30168e-14	0.752649	1.43793e+06	0.00750008	6.93446	0.00845512
AP1B1	22	28827680	29888583	13987.3	0.594195	11.472	0.56609	11.472	0.56609	3.01523e-14	0.696039	1.83485e+06	0.633733	0.969888	0.324708
AP1G1	16	71229000	72309201	14970.7	0.601459	6.39729	0.477171	6.39729	0.477171	3.51745e-14	0.392286	1.49387e+06	0.874723	0.754265	0.38513
AP1G2	14	23059565	24068070	16799.6	0.395052	32.375	0.37815	32.375	0.37815	8.27372e-14	0.436387	1.76391e+06	0.698023	0.00790869	0.929137
AP1M1	19	15697854	16745906	16241.5	0.220131	16.0482	0.254552	16.0482	0.254552	5.21258e-14	0.610867	1.62568e+06	0.648986	NA	NA
AP1M2	19	10072671	11087315	11938.2	0.0859598	20.304	0.2412	20.304	0.2412	8.10786e-14	0.153342	1.76044e+06	0.082098	1.12304	0.289265
AP1S1	7	100654456	101661596	42390.6	0.117079	22.3637	0.48588	22.3637	0.48588	1.00331e-13	0.269753	1.18793e+06	0.492224	1.89452	0.168693
AP1S3	2	223167680	224338027	14765.1	0.639825	9.65834	0.840739	9.65834	0.840739	4.77611e-14	0.838863	291935	0.285972	0.0796281	0.777802
AP2A1	19	49267001	50307114	17015.6	0.0566637	10.3399	0.673461	10.3399	0.673461	2.59244e-13	0.111753	951234	0.761619	0.52916	0.46696
AP2A2	11	424881	1512245	6080.97	0.914909	4.0137	0.943835	4.0137	0.943835	5.43211e-14	0.423139	1.24409e+06	0.692878	2.18436	0.139419
AP2B1	17	35078046	36226413	16703.4	0.787344	7.06533	0.954596	7.06533	0.954596	4.73766e-14	0.841128	2.10613e+06	0.0811013	NA	NA
AP2M1	3	183674689	184684214	46106.8	0.179263	41.9981	0.16268	41.9981	0.16268	2.90614e-13	0.0372122	308733	0.151349	NA	NA
AP2S1	19	46338136	47350846	9337.14	0.719798	12.9624	0.716074	12.9624	0.716074	1.07109e-13	0.531619	1.26322e+06	0.683334	0.022669	0.880321
AP3B1	5	77500522	78794762	17076.9	0.795274	28.8671	0.48369	28.8671	0.48369	1.05512e-13	0.750854	1.75887e+06	0.842624	NA	NA
AP3B2	15	82159281	83210112	6961.36	0.791368	12.3075	0.377647	12.3075	0.377647	2.39462e-14	0.640056	1.35625e+06	0.30631	2.74712	0.0974294
AP3D1	19	1600988	2664468	42777.4	0.0529822	41.3115	0.0620291	41.3115	0.0620291	1.12989e-13	0.483187	1.48471e+06	0.295838	1.38402	0.239418
AP3M1	10	73620255	74650842	8396.29	0.226145	6.62459	0.190648	6.62459	0.190648	4.08168e-15	0.194126	1.58083e+06	0.419817	1.11116	0.29183
AP3M2	8	41652946	42671673	10839.2	0.566274	11.5121	0.37584	11.5121	0.37584	1.30882e-14	0.972062	1.3792e+06	0.453394	1.89817	0.168283
AP3S1	5	115341592	116414081	12229.8	0.851017	12.3604	0.844679	12.3604	0.844679	6.04732e-14	0.902305	1.16882e+06	0.149762	NA	NA
AP3S2	15	89330599	90394638	44044.9	0.157236	18.1466	0.634337	18.1466	0.634337	1.01475e-13	0.578497	1.01043e+06	0.631713	NA	NA
AP4B1	1	113394194	114405201	22919.4	0.266771	23.2876	0.106574	23.2876	0.106574	2.02856e-13	0.249637	980283	0.231956	NA	NA
AP4E1	15	50408672	51505895	9953.23	0.719303	12.2981	0.166556	12.2981	0.166556	3.39593e-14	0.693429	1.489e+06	0.348435	NA	NA
AP4M1	7	99601549	100610345	2681.84	0.562576	2.16962	0.68832	2.16962	0.68832	8.52777e-15	0.505567	1.06061e+06	0.219857	0.809256	0.36834
AP4S1	14	30525106	31630996	17566.1	0.40819	20.5572	0.458148	20.5572	0.458148	6.61862e-14	0.551302	2.16844e+06	0.0567767	3.22022	0.0727344
AP5B1	11	65273898	66280976	6338.5	0.8579	2.62407	0.813259	2.62407	0.813259	8.49478e-15	0.859353	1.4597e+06	0.267665	1.84392	0.174493
AP5M1	14	56768924	57798742	42954.4	0.0165453	40.3388	0.0331705	40.3388	0.0331705	9.91086e-14	0.121402	1.47272e+06	0.481833	0.199288	0.655297
AP5S1	20	3320524	4328838	25960.4	0.569358	21.2852	0.424578	21.2852	0.424578	1.59717e-13	0.66767	1.6544e+06	0.236893	NA	NA
AP5Z1	7	4275615	5294397	19774.2	0.677003	22.6535	0.23123	22.6535	0.23123	8.40792e-14	0.804344	1.64588e+06	0.669201	NA	NA
APAF1	12	98145290	99235433	32470.5	0.34544	12.263	0.84486	12.263	0.84486	1.42881e-13	0.38602	1.37916e+06	0.266838	NA	NA
APBA1	9	68927532	70172371	26498.3	0.288728	51.6669	0.0912251	51.6669	0.0912251	1.69284e-13	0.230827	2.18528e+06	0.00652638	NA	NA
APBA2	15	28384483	29618315	14612.9	0.192952	17.4871	0.485699	17.4871	0.485699	1.43466e-13	0.379712	1.72355e+06	0.664842	1.01069	0.314736
APBA3	19	3250772	4261692	14475	0.30629	26.5795	0.215037	26.5795	0.215037	5.07622e-14	0.70892	1.81665e+06	0.0746269	0.0425039	0.836662
APBB1	11	5895125	6919414	20981	0.800742	29.2531	0.429817	29.2531	0.429817	1.231e-13	0.773121	NA	NA	NA	NA
APBB1IP	10	25938341	27067803	27432.8	0.250924	31.1017	0.402979	31.1017	0.402979	1.24452e-13	0.472882	2.03572e+06	0.482659	NA	NA
APBB2	4	40310027	41716714	24535.9	0.808914	36.7889	0.322392	36.7889	0.322392	1.45006e-13	0.879666	2.24625e+06	0.328356	NA	NA
APBB3	5	140058268	141064781	3878.37	0.452447	0.547722	0.992383	0.547722	0.992383	1.89954e-14	0.237891	355344	0.615131	1.00294	0.316599
APC	5	112207518	113346239	37365.6	0.285973	16.8199	0.299423	16.8199	0.299423	9.37662e-14	0.562122	1.81683e+06	0.00244145	NA	NA
APC2	19	946302	1973244	14898.3	0.520355	23.3044	0.591802	23.3044	0.591802	1.26081e-13	0.43086	1.19337e+06	0.846335	0.442074	0.506123
APCDD1	18	9954635	10989949	69962.3	0.382312	35.7789	0.419979	35.7789	0.419979	1.8066e-13	0.902491	1.75208e+06	0.148053	NA	NA
APCDD1L	20	57959101	59015399	90395.4	0.125657	33.5856	0.618442	33.5856	0.618442	1.29731e-13	0.535504	1.36994e+06	0.377919	NA	NA
APCS	1	159087826	160088865	21317.9	0.522242	12.9812	0.863438	12.9812	0.863438	8.81776e-14	0.67277	617367	0.428263	NA	NA
APEH	3	49174014	50183971	177.569	0.908623	0.575757	0.855842	0.575757	0.855842	1.95599e-15	0.817568	873786	0.745145	0.707697	0.400209
APELA	4	164377178	165398965	26916.8	0.261041	19.0758	0.612602	19.0758	0.612602	7.00366e-14	0.914377	375275	0.514602	NA	NA
APEX1	14	19955191	20957772	49597.3	0.386236	43.8699	0.721522	43.8699	0.721522	1.56695e-13	0.827518	1.90877e+06	0.0998086	NA	NA
APH1A	1	149765399	150769580	8267.53	0.272856	1.26711	0.869605	1.26711	0.869605	3.17705e-14	0.641796	409629	0.486864	0.518546	0.471462
APH1B	15	62776018	63809126	10065.2	0.679088	6.49541	0.551548	6.49541	0.551548	3.90654e-14	0.623382	1.47386e+06	0.0518488	4.5531	0.0328594
API5	11	42811963	43844529	9272.25	0.923382	9.08016	0.915193	9.08016	0.915193	7.05681e-14	0.907538	1.29823e+06	0.846771	1.01355	0.314055
APIP	11	34353094	35416379	24592.2	0.756172	11.3359	0.90416	11.3359	0.90416	6.91667e-14	0.873082	1.96317e+06	0.0115292	NA	NA
APLF	2	67967572	69155862	44251.7	0.256735	48.0548	0.258169	48.0548	0.258169	1.81272e-13	0.0405381	1.98637e+06	0.0376254	NA	NA
APLNR	11	56733577	57737250	14458.5	0.565045	11.8192	0.480013	11.8192	0.480013	4.85772e-14	0.689698	1.44136e+06	0.504241	2.40415	0.121014
APLP1	19	35367899	36379792	7876.87	0.937305	15.2594	0.696737	15.2594	0.696737	9.56824e-14	0.630012	1.77257e+06	0.316231	0.00928374	0.923241
APLP2	11	129568147	130644811	35113.3	0.0878338	26.5639	0.386295	26.5639	0.386295	2.56184e-13	0.0640692	1.08437e+06	0.129215	NA	NA
APMAP	20	24462925	25492751	64847.3	0.00306248	25.2929	0.103082	25.2929	0.103082	1.70111e-13	0.00924983	1.78855e+06	0.29804	0.017006	0.896244
APOA1	11	116335751	117337622	29270.2	0.0940754	39.9459	0.253691	39.9459	0.253691	2.06907e-13	0.240977	1.23792e+06	0.1647	NA	NA
APOA2	1	160722292	161723631	129746	0.0288461	16.9418	0.352874	16.9418	0.352874	2.11046e-13	0.0870685	301446	0.988033	0.249154	0.617672
APOA4	11	116320700	117323304	29270.2	0.0940754	39.9459	0.253691	39.9459	0.253691	2.06907e-13	0.240977	1.24192e+06	0.166579	NA	NA
APOA5	11	116289367	117292420	30488.8	0.115388	41.208	0.267868	41.208	0.267868	2.11932e-13	0.250354	1.25751e+06	0.189222	NA	NA
APOB	2	20501429	21544073	25318.1	0.357692	8.63148	0.981571	8.63148	0.981571	5.65729e-14	0.73095	1.52422e+06	0.765788	NA	NA
APOBEC1	12	7149400	8165908	31285.8	0.0191657	31.4154	0.12059	31.4154	0.12059	1.07542e-13	0.28839	1.67775e+06	0.268908	0.259909	0.610183
APOBEC2	6	40553202	41564891	27950.7	0.42527	29.8703	0.17745	29.8703	0.17745	1.37285e-13	0.251316	1.37534e+06	0.651352	NA	NA
APOBEC3A	22	38452741	39463184	29671.1	0.236555	9.75552	0.301295	9.75552	0.301295	7.51393e-14	0.152881	1.88061e+06	0.0150198	0.23333	0.629066
APOBEC3B	22	38482347	39492804	32998.5	0.0591664	10.1803	0.278314	10.1803	0.278314	1.11997e-13	0.0399848	1.89348e+06	0.0188432	0.196	0.65797
APOBEC3C	22	38514257	39520352	32990.3	0.057885	10.1753	0.271537	10.1753	0.271537	1.11997e-13	0.0399795	1.90032e+06	0.0167107	0.177517	0.673516
APOBEC3D	22	38521113	39533277	33088.3	0.0595943	10.277	0.287629	10.277	0.287629	1.13197e-13	0.0472034	1.8916e+06	0.0176398	0.177517	0.673516
APOBEC3F	22	38540604	39555972	33089.7	0.0595984	11.0156	0.323462	11.0156	0.323462	1.13247e-13	0.047218	1.84532e+06	0.038549	0.152686	0.695982
APOBEC3G	22	38577067	39587743	35220.3	0.0517263	11.0175	0.323387	11.0175	0.323387	1.2271e-13	0.0383959	1.75461e+06	0.0626997	0.215476	0.642509
APOBEC3H	22	38597224	39604067	35220.3	0.0517263	11.0175	0.323387	11.0175	0.323387	1.2271e-13	0.0383959	1.67934e+06	0.103204	0.158721	0.690337
APOBEC4	1	183146275	184153316	38000.8	0.641027	28.2479	0.492658	28.2479	0.492658	1.39981e-13	0.250926	284986	0.333257	NA	NA
APOBR	16	27994643	28998964	6954.69	0.838154	2.24584	0.805523	2.24584	0.805523	2.09476e-15	0.993716	1.18243e+06	0.724716	0.473437	0.49141
APOC1	19	44414247	45419349	29427.8	0.111911	42.3421	0.0772126	42.3421	0.0772126	4.33563e-13	0.00904531	1.22173e+06	0.879153	NA	NA
APOC2	19	44446035	45449565	29416.8	0.110698	42.3345	0.0768668	42.3345	0.0768668	4.33562e-13	0.00904525	1.22495e+06	0.878845	NA	NA
APOC3	11	116329706	117333072	29270.2	0.0940754	39.9459	0.253691	39.9459	0.253691	2.06907e-13	0.240977	1.23949e+06	0.170044	NA	NA
APOC4	19	44442237	45445496	29416.8	0.110698	42.3345	0.0768668	42.3345	0.0768668	4.33562e-13	0.00904525	1.22339e+06	0.868994	NA	NA
APOC4-APOC2	19	44442238	45449565	29416.8	0.110698	42.3345	0.0768668	42.3345	0.0768668	4.33562e-13	0.00904525	1.22791e+06	0.876695	NA	NA
APOD	3	195068705	196084033	15993.3	0.046246	13.7619	0.157509	13.7619	0.157509	1.12461e-13	0.0557308	221305	0.127676	2.07004	0.150218
APOE	19	44405791	45409393	29427.8	0.111911	42.3421	0.0772126	42.3421	0.0772126	4.33563e-13	0.00904531	1.22509e+06	0.889708	NA	NA
APOF	12	55860568	56862857	9631.6	0.543606	3.02054	0.953838	3.02054	0.953838	8.2273e-15	0.974435	1.44896e+06	0.453446	0.822631	0.364412
APOH	17	65712033	66756525	8072.66	0.902963	7.70168	0.851116	7.70168	0.851116	2.12747e-14	0.876481	1.69503e+06	0.0624423	0.0383172	0.844808
APOL1	22	35753071	36767530	45914.2	0.303385	18.0948	0.461003	18.0948	0.461003	1.30782e-13	0.16347	1.59031e+06	0.599919	NA	NA
APOL2	22	35726209	36739954	45892.8	0.303215	17.9783	0.457067	17.9783	0.457067	1.30778e-13	0.163459	1.63559e+06	0.478108	NA	NA
APOL3	22	35640329	36666177	44923.4	0.28531	23.0684	0.12155	23.0684	0.12155	1.32077e-13	0.123188	1.74258e+06	0.383347	NA	NA
APOL4	22	35689124	36704840	45206.4	0.307955	16.7452	0.518455	16.7452	0.518455	1.308e-13	0.16392	1.6573e+06	0.459545	NA	NA
APOL5	22	35217872	36229483	58064.2	0.252854	28.2555	0.104844	28.2555	0.104844	1.40521e-13	0.401654	1.78488e+06	0.163886	NA	NA
APOL6	22	35148446	36168404	32278.5	0.574589	26.9082	0.106711	26.9082	0.106711	9.04383e-14	0.663719	1.94923e+06	0.0597824	NA	NA
APOLD1	12	12225917	13329975	75937.1	0.226454	43.2037	0.399776	43.2037	0.399776	2.07362e-13	0.32179	1.86851e+06	0.139177	NA	NA
APOM	6	31152416	32158210	22438.3	0.360975	22.1374	0.266457	22.1374	0.266457	9.05375e-14	0.291065	1.74499e+06	0.139845	NA	NA
APP	21	25380535	26671128	11280.7	0.945874	5.59171	0.996269	5.59171	0.996269	5.16146e-14	0.966255	2.33249e+06	0.670361	NA	NA
APPBP2	17	59943158	61026242	1851.16	0.564319	0.255527	0.737446	0.255527	0.737446	2.40252e-15	0.691461	1.54329e+06	0.562344	2.5175	0.112589
APPL1	3	56727726	57778105	12277.4	0.766782	11.6932	0.771389	11.6932	0.771389	6.73505e-14	0.824024	1.50734e+06	0.492579	NA	NA
APPL2	12	104673297	105736203	30877.1	0.762597	10.5858	0.722494	10.5858	0.722494	1.3906e-13	0.450211	966731	0.707042	NA	NA
APRT	16	88309339	89311937	7805.38	0.851343	10.4612	0.702514	10.4612	0.702514	7.3358e-14	0.711866	1.33007e+06	0.270285	5.6652	0.0173045
APTX	9	32386601	33525130	28753.9	0.101551	14.9808	0.675392	14.9808	0.675392	1.30574e-13	0.416287	2.0402e+06	0.17627	NA	NA
AQP1	7	30411853	31425517	19011.7	0.862518	8.65167	0.990978	8.65167	0.990978	5.73137e-14	0.981032	1.85273e+06	0.167709	0.0326335	0.856644
AQP10	1	153821090	154825325	18276.3	0.854081	6.47261	0.899466	6.47261	0.899466	2.25704e-14	0.966086	485577	0.416304	0.661703	0.415959
AQP11	11	77089391	78110356	13429.4	0.564872	6.87177	0.786986	6.87177	0.786986	2.64117e-14	0.529968	1.46521e+06	0.746548	0.554317	0.456559
AQP12A	2	240191866	241198483	18113.7	0.473844	40.7936	0.0304179	40.7936	0.0304179	2.18995e-13	0.0285854	77185.3	0.771394	NA	NA
AQP12B	2	240176418	241182906	18113.7	0.474971	40.7937	0.0339229	40.7937	0.0339229	2.18995e-13	0.0293431	78534.7	0.78335	NA	NA
AQP2	12	49450737	50458878	7443.2	0.467826	11.2367	0.190697	11.2367	0.190697	9.53667e-14	0.288202	953988	0.68486	1.07632	0.299523
AQP3	9	32941156	33947596	18324.2	0.0903916	9.89828	0.832201	9.89828	0.832201	1.76672e-14	0.954383	2.23758e+06	0.0201824	2.21731	0.136471
AQP4	18	26352043	27365771	42288	0.688631	21.3697	0.673724	21.3697	0.673724	2.51544e-13	0.254789	1.72145e+06	0.468678	NA	NA
AQP5	12	49461872	50465682	7443.2	0.467826	11.2367	0.190697	11.2367	0.190697	9.53667e-14	0.288202	958152	0.662184	1.07632	0.299523
AQP6	12	49467194	50477139	7443.2	0.467826	11.2367	0.190697	11.2367	0.190697	9.53667e-14	0.288202	983120	0.643449	1.07632	0.299523
AQP7	9	32883179	33902682	22379.2	0.0895511	12.9268	0.740988	12.9268	0.740988	9.80757e-14	0.337543	2.20512e+06	0.0267606	2.10183	0.147123
AQP7B	2	94087101	95112744	1476.5	0.248094	0.0258993	0.379923	0.0258993	0.379923	1.08474e-14	0.227455	1.2786e+06	0.365225	0.227338	0.633505
AQP8	16	24715731	25728932	8078.74	0.818905	18.6194	0.367211	18.6194	0.367211	6.76932e-14	0.812749	1.82456e+06	0.314778	NA	NA
AQP9	15	57638169	58685911	19517.6	0.958097	16.1694	0.945247	16.1694	0.945247	8.24395e-14	0.840923	1.41579e+06	0.419143	NA	NA
AQR	15	34351782	35469742	20637.8	0.654755	18.5369	0.599455	18.5369	0.599455	1.31757e-13	0.458932	2.05424e+06	0.0151838	NA	NA
ARAP1	11	72185069	73293599	38251.9	0.050051	33.3544	0.165578	33.3544	0.165578	2.10689e-13	0.104388	1.35432e+06	0.423043	2.73383	0.0982426
ARAP2	4	35448221	36744514	25523.6	0.457246	23.3788	0.202255	23.3788	0.202255	1.2509e-13	0.08328	2.17521e+06	0.413553	0.839988	0.3594
ARAP3	5	141153401	142182230	19966.8	0.333386	10.0236	0.980314	10.0236	0.980314	7.40422e-14	0.254598	643303	0.172816	NA	NA
ARC	8	142111049	143114479	13044.3	0.488248	7.44261	0.797244	7.44261	0.797244	9.27209e-14	0.18337	702188	0.0737158	0.57503	0.448267
ARCN1	11	118072390	119103033	19123.4	0.279207	8.2658	0.829052	8.2658	0.829052	7.59835e-14	0.348246	852612	0.722364	0.168369	0.681566
AREG	4	73945136	74955005	13094.6	0.256946	17.6802	0.318902	17.6802	0.318902	5.45456e-14	0.676934	1.35632e+06	0.338349	2.43232	0.118857
AREL1	14	74153437	75213117	4909.08	0.949506	5.62247	0.947951	5.62247	0.947951	1.99601e-14	0.895083	1.3014e+06	0.402726	0.34949	0.554402
ARF1	1	227582708	228599212	16956.6	0.138455	11.3111	0.187765	11.3111	0.187765	6.39147e-14	0.530257	128531	0.318484	1.07086	0.300752
ARF3	12	48435723	49457487	10761.1	0.195712	3.41704	0.952987	3.41704	0.952987	5.97253e-14	0.391665	1.10165e+06	0.786105	0.414786	0.519551
ARF4	3	57071363	58098220	5376.86	0.911983	6.14333	0.694817	6.14333	0.694817	5.83798e-14	0.595925	1.52337e+06	0.538584	0.0307342	0.860835
ARF5	7	127088386	128091700	10765.2	0.189199	21.9578	0.135321	21.9578	0.135321	7.06801e-14	0.21045	850476	0.521217	0.352334	0.552795
ARF6	14	49393079	50397054	18246.8	0.315168	7.14604	0.674542	7.14604	0.674542	2.03571e-14	0.958567	915937	0.757378	0.0864099	0.768792
ARFGAP1	20	62772785	63789790	22789.4	0.403356	25.4645	0.144692	25.4645	0.144692	5.4692e-14	0.8483	1.47089e+06	0.0428566	0.789987	0.374104
ARFGAP2	11	46664299	47677125	2042.08	0.429764	0.92195	0.272394	0.92195	0.272394	3.79192e-16	0.524071	1.12246e+06	0.688409	0.397813	0.528221
ARFGAP3	22	42296502	43358106	41943.3	0.109795	28.1405	0.0799157	28.1405	0.0799157	1.97154e-13	0.268073	1.41716e+06	0.560353	NA	NA
ARFGEF1	8	66673511	67843781	11407.9	0.219399	17.7155	0.0338386	17.7155	0.0338386	6.55729e-14	0.27295	1.83973e+06	0.114527	2.16678	0.141021
ARFGEF2	20	48421711	49536693	13871.6	0.698969	17.2892	0.318132	17.2892	0.318132	1.67416e-13	0.0955978	1.24374e+06	0.696236	1.48776	0.222565
ARFGEF3	6	137661939	138844663	17831.2	0.790643	24.5623	0.524359	24.5623	0.524359	1.30692e-13	0.657114	653431	0.798218	NA	NA
ARFIP1	4	152279937	153418463	21018.1	0.700339	18.9167	0.323044	18.9167	0.323044	2.25748e-13	0.250775	586639	0.161016	0.343634	0.557739
ARFIP2	11	5974683	6981479	15700.8	0.957265	27.661	0.51114	27.661	0.51114	8.42436e-14	0.969315	NA	NA	NA	NA
ARFRP1	20	63198642	64208025	23711.2	0.198517	50.9904	0.00352408	50.9904	0.00352408	1.04327e-13	0.130611	1.27002e+06	0.175183	0.880864	0.347965
ARG1	6	130970832	132084332	86487.5	0.0222222	12.6503	0.387794	12.6503	0.387794	2.43965e-13	0.0392821	1.10072e+06	0.0335414	6.56769	0.0103846
ARG2	14	67119920	68151708	5902.13	0.985652	3.95835	0.940124	3.95835	0.940124	4.80728e-14	0.689401	1.32021e+06	0.555252	0.273099	0.601261
ARGFX	3	121067949	122090622	18007.2	0.0827981	15.4487	0.221449	15.4487	0.221449	7.82505e-14	0.357643	873927	0.837921	0.619289	0.431311
ARGLU1	13	106041673	107068137	34875.9	0.468574	41.1709	0.300191	41.1709	0.300191	1.01448e-13	0.648873	1.03566e+06	0.616742	NA	NA
ARHGAP1	11	46177080	47200619	6021.69	0.485392	1.90851	0.766346	1.90851	0.766346	1.79061e-15	0.880268	1.22924e+06	0.695065	0.290534	0.589878
ARHGAP10	4	147232063	148572776	17013.4	0.483237	14.6366	0.538342	14.6366	0.538342	1.49401e-13	0.637414	851216	0.124783	NA	NA
ARHGAP11A	15	32115144	33139941	23704.3	0.247979	23.9768	0.319917	23.9768	0.319917	6.76428e-14	0.659224	1.85679e+06	0.223086	0.911645	0.339678
ARHGAP11A-SCG5	15	32113860	33197095	23985.2	0.267366	24.1033	0.330686	24.1033	0.330686	6.89537e-14	0.707558	1.9651e+06	0.207967	NA	NA
ARHGAP11B	15	30124494	31149529	12842.5	0.189091	10.5057	0.405244	10.5057	0.405244	4.28528e-14	0.340079	1.9759e+06	0.0825178	0.112365	0.737468
ARHGAP12	10	31305398	32428876	7830.87	0.832585	9.19481	0.835007	9.19481	0.835007	1.24486e-14	0.974819	2.07537e+06	0.0687775	3.98754	0.0458385
ARHGAP15	2	142591362	144268352	21789.4	0.308647	31.9351	0.41151	31.9351	0.41151	1.33673e-13	0.37164	938402	0.469651	NA	NA
ARHGAP17	16	24419389	25515666	12552.9	0.873125	22.3264	0.40124	22.3264	0.40124	7.09833e-14	0.883019	1.94708e+06	0.298211	NA	NA
ARHGAP18	6	129076132	130210177	63663.8	0.0465802	47.708	0.0414046	47.708	0.0414046	2.85856e-13	0.0292007	1.04876e+06	0.0980821	NA	NA
[truncated: 17,979 more rows]

## Sheet: 3.Alzheimer's Disease
Supplementary Data Table 3.Alzheimer's Disease showing gene-disease associations for methods compared including RBAM-ED, RBAM-D, RBAM-E, RBAM-XAI, SKAT, REGENIE. )The table includes gene name, chromosome, region start and end),
[truncated: 18,822 more rows]

[truncated: 17 more sheets: 4.Obsessive Compulsive Disorder, 5.Breast Cancer, 6.Prostate cancer, 7.Colon Cancer, 8.Type 2 Diabetes, 9.Type 1 Diabetes, 10.Bipolar Disorder, 11.Chron's Disease, 12.Coronary Disease, 13.Hypertension, 14.Rheumatoid arthritis, 15.HDL cholesterol, 16.LDL Cholesterol, 17.Eosinophil count, 18. EOS  + T1D + RA, 19. ALZ + LDL, 20. CAD+HT+RA+T1D+CD]
